# Supplementary material for: Identification of Candidate Genes for the Plateau Adaptation of a Tibetan Amphipod, Gammarus lacustris, Through Integration of Genome and Transcriptome Sequencing
Source: Front Genet. 2019 Feb 11;10:53. doi: 10.3389/fgene.2019.00053 (PMC6378286; doi:10.3389/fgene.2019.00053)
Supplement: Table S1 — Summary of BLASTx results for unigenes of the full-length transcritpome of G. lacustris. [file Table_1.XLS]

#Gene id	NR id	NR annotation	Swissprot id	Swissprot annotation	KEGG id	KO	KEGG gene name	KEGG description	Pathway	Pathway definition	KOG id	KOG defination	KOG code	KOG categories	KOG class	eggNOG abbreviation	eggNOG id	eggNOG description	GO annotation	Pfam IDs	Pfam Description
i0_HQ_sampled12fd9_c10004_f2p0_466	--	--	--	--	--	--	--	--	--	--	--	--	--	--	--	--	--	--	--	--	--
i0_HQ_sampled12fd9_c10027_f4p0_339	--	--	--	--	--	--	--	--	--	--	--	--	--	--	--	--	--	--	--	--	--
i0_HQ_sampled12fd9_c1002_f16p0_600	--	--	--	--	--	--	--	--	--	--	--	--	--	--	--	--	--	--	--	--	--
i0_HQ_sampled12fd9_c10036_f2p0_414	--	--	--	--	--	--	--	--	--	--	--	--	--	--	--	--	--	--	--	--	--
i0_HQ_sampled12fd9_c1003_f11p0_485	--	--	--	--	--	--	--	--	--	--	--	--	--	--	--	--	--	--	--	--	--
i0_HQ_sampled12fd9_c10046_f2p0_802	--	--	--	--	--	--	--	--	--	--	--	--	--	--	--	--	--	--	--	--	--
i0_HQ_sampled12fd9_c10081_f4p0_533	--	--	--	--	--	--	--	--	--	--	--	--	--	--	--	--	--	--	--	--	--
i0_HQ_sampled12fd9_c10089_f6p4_992	--	--	--	--	--	--	--	--	--	--	--	--	--	--	--	--	--	--	--	--	--
i0_HQ_sampled12fd9_c10092_f2p0_317	--	--	--	--	--	--	--	--	--	--	--	--	--	--	--	--	--	--	--	--	--
i0_HQ_sampled12fd9_c10101_f2p0_380	--	--	--	--	--	--	--	--	--	--	--	--	--	--	--	--	--	--	--	--	--
i0_HQ_sampled12fd9_c1010_f5p0_935	--	--	--	--	--	--	--	--	--	--	--	--	--	--	--	--	--	--	--	--	--
i0_HQ_sampled12fd9_c1014_f6p0_408	--	--	--	--	--	--	--	--	--	--	--	--	--	--	--	--	--	--	--	--	--
i0_HQ_sampled12fd9_c10222_f4p0_613	gi|870825932|gb|AKP18001.1|	chitinase 2 [Eriocheir sinensis]	--	--	tca:652967	K01183	E3.2.1.14	chitinase	ko00520	Amino sugar and nucleotide sugar metabolism	--	--	--	--	--	G	COG3325	chitinase	--	--	--
i0_HQ_sampled12fd9_c10272_f2p0_481	--	--	--	--	--	--	--	--	--	--	--	--	--	--	--	--	--	--	--	--	--
i0_HQ_sampled12fd9_c10323_f4p0_395	gi|289169085|emb|CAX46429.1|	hemocyanin subunit 2 precursor, partial [Odontodactylus scyllarus]	P04254.2	RecName: Full=Hemocyanin A chain	--	--	--	--	--	--	--	--	--	--	--	--	--	--	--	--	--
i0_HQ_sampled12fd9_c1032_f6p0_723	gi|985390981|ref|XP_015380174.1|	PREDICTED: protein BRICK1 [Diuraphis noxia]	Q6IQ86.1	RecName: Full=Probable protein BRICK1	--	--	--	--	--	--	--	--	--	--	--	S	ENOG4111UHX	BRICK1, SCAR WAVE actin-nucleating complex subunit	--	--	--
i0_HQ_sampled12fd9_c10341_f2p1_468	--	--	--	--	--	--	--	--	--	--	--	--	--	--	--	--	--	--	--	--	--
i0_HQ_sampled12fd9_c1034_f6p0_398	--	--	--	--	--	--	--	--	--	--	--	--	--	--	--	--	--	--	--	--	--
i0_HQ_sampled12fd9_c10359_f4p0_837	--	--	--	--	--	--	--	--	--	--	--	--	--	--	--	--	--	--	--	--	--
i0_HQ_sampled12fd9_c1035_f6p0_507	--	--	--	--	--	--	--	--	--	--	--	--	--	--	--	--	--	--	--	--	--
i0_HQ_sampled12fd9_c10398_f2p0_670	--	--	--	--	--	--	--	--	--	--	--	--	--	--	--	--	--	--	--	--	--
i0_HQ_sampled12fd9_c103_f9p0_529	--	--	--	--	--	--	--	--	--	--	--	--	--	--	--	--	--	--	--	--	--
i0_HQ_sampled12fd9_c10431_f2p0_447	--	--	--	--	--	--	--	--	--	--	--	--	--	--	--	--	--	--	--	--	--
i0_HQ_sampled12fd9_c10458_f2p0_352	--	--	--	--	--	--	--	--	--	--	--	--	--	--	--	--	--	--	--	--	--
i0_HQ_sampled12fd9_c10486_f2p4_947	--	--	--	--	--	--	--	--	--	--	--	--	--	--	--	--	--	--	--	--	--
i0_HQ_sampled12fd9_c1048_f9p0_667	--	--	--	--	--	--	--	--	--	--	--	--	--	--	--	--	--	--	--	--	--
i0_HQ_sampled12fd9_c1053_f5p0_484	gi|334690638|gb|AEG80154.1|	Tcp-1-beta [Litopenaeus vannamei]	Q3ZBH0.3	RecName: Full=T-complex protein 1 subunit beta; Short=TCP-1-beta; AltName: Full=CCT-beta	cfo:105251382	K09494	CCT2	T-complex protein 1 subunit beta	--	--	KOG0363	Chaperonin complex component, TCP-1 beta subunit (CCT2)	[O]	CELLULAR PROCESSES AND SIGNALING	Posttranslational modification, protein turnover, chaperones	O	COG0459	Prevents misfolding and promotes the refolding and proper assembly of unfolded polypeptides generated under stress conditions (By similarity)	Molecular Function: ATP binding (GO:0005524);|Cellular Component: cytoplasm (GO:0005737);|Biological Process: protein folding (GO:0006457);|Molecular Function: unfolded protein binding (GO:0051082);	--	--
i0_HQ_sampled12fd9_c10542_f3p2_519	--	--	--	--	--	--	--	--	--	--	--	--	--	--	--	--	--	--	--	--	--
i0_HQ_sampled12fd9_c10550_f2p3_841	--	--	--	--	--	--	--	--	--	--	--	--	--	--	--	--	--	--	--	--	--
i0_HQ_sampled12fd9_c10584_f3p0_849	--	--	--	--	--	--	--	--	--	--	--	--	--	--	--	--	--	--	--	--	--
i0_HQ_sampled12fd9_c1058_f3p0_824	--	--	--	--	--	--	--	--	--	--	--	--	--	--	--	--	--	--	--	--	--
i0_HQ_sampled12fd9_c1060_f21p0_584	gi|768410055|ref|XP_011556168.1|	PREDICTED: probable NADH dehydrogenase [ubiquinone] iron-sulfur protein 6, mitochondrial [Plutella xylostella]	Q19724.1	RecName: Full=Probable NADH dehydrogenase [ubiquinone] iron-sulfur protein 6, mitochondrial; AltName: Full=Complex I-13kD-A; Short=CI-13kD-A; AltName: Full=NADH-ubiquinone oxidoreductase 13 kDa-A subunit; Flags: Precursor	pxy:105387174	K03939	NDUFS6	NADH dehydrogenase (ubiquinone) Fe-S protein 6	ko00190	Oxidative phosphorylation	--	--	--	--	--	I	ENOG4111W6X	electron transport chain	--	--	--
i0_HQ_sampled12fd9_c1061_f5p0_669	--	--	--	--	--	--	--	--	--	--	--	--	--	--	--	--	--	--	--	--	--
i0_HQ_sampled12fd9_c10646_f2p0_626	--	--	--	--	--	--	--	--	--	--	--	--	--	--	--	--	--	--	--	--	--
i0_HQ_sampled12fd9_c10654_f2p5_737	gi|970911450|ref|XP_015121944.1|	PREDICTED: uncharacterized protein LOC107044541 [Diachasma alloeum]	--	--	--	--	--	--	--	--	--	--	--	--	--	S	ENOG410XP6K	Notch ligand involved in the mediation of Notch signaling (By similarity)	--	--	--
i0_HQ_sampled12fd9_c10663_f4p0_499	--	--	--	--	--	--	--	--	--	--	--	--	--	--	--	--	--	--	--	--	--
i0_HQ_sampled12fd9_c10670_f2p1_499	--	--	--	--	--	--	--	--	--	--	--	--	--	--	--	--	--	--	--	--	--
i0_HQ_sampled12fd9_c1067_f5p0_746	gi|759047919|ref|XP_011332997.1|	PREDICTED: cytochrome b-c1 complex subunit 9 [Cerapachys biroi]	--	--	dwi:Dwil_GK21685	K00419	QCR9, UCRC	ubiquinol-cytochrome c reductase subunit 9	ko00190|ko04260	Oxidative phosphorylation|Cardiac muscle contraction	--	--	--	--	--	C	ENOG410XUZE	mitochondrial electron transport, ubiquinol to cytochrome c	--	--	--
i0_HQ_sampled12fd9_c10705_f2p0_684	--	--	--	--	--	--	--	--	--	--	--	--	--	--	--	--	--	--	--	--	--
i0_HQ_sampled12fd9_c10728_f3p8_970	--	--	--	--	--	--	--	--	--	--	--	--	--	--	--	--	--	--	--	--	--
i0_HQ_sampled12fd9_c10769_f7p0_812	gi|113866028|ref|NP_001038957.1|	ubiquinol-cytochrome C reductase complex 14kD subunit [Bombyx mori]	Q9D855.3	RecName: Full=Cytochrome b-c1 complex subunit 7; AltName: Full=Complex III subunit 7; AltName: Full=Complex III subunit VII; AltName: Full=Ubiquinol-cytochrome c reductase complex 14 kDa protein	bmor:751613	K00417	QCR7, UQCRB	ubiquinol-cytochrome c reductase subunit 7	ko00190|ko04260	Oxidative phosphorylation|Cardiac muscle contraction	--	--	--	--	--	C	ENOG4111V1G	component of the ubiquinol-cytochrome c reductase complex (complex III or cytochrome b-c1 complex), which is part of the mitochondrial respiratory chain (By similarity)	Cellular Component: mitochondrion (GO:0005739);|Cellular Component: membrane (GO:0016020);	--	--
i0_HQ_sampled12fd9_c10771_f2p4_458	--	--	--	--	--	--	--	--	--	--	--	--	--	--	--	--	--	--	--	--	--
i0_HQ_sampled12fd9_c10784_f2p0_336	--	--	--	--	--	--	--	--	--	--	--	--	--	--	--	--	--	--	--	--	--
i0_HQ_sampled12fd9_c1079_f9p0_996	--	--	--	--	--	--	--	--	--	--	--	--	--	--	--	--	--	--	--	--	--
i0_HQ_sampled12fd9_c10811_f3p9_381	--	--	--	--	--	--	--	--	--	--	--	--	--	--	--	--	--	--	--	--	--
i0_HQ_sampled12fd9_c10851_f2p2_879	--	--	--	--	--	--	--	--	--	--	--	--	--	--	--	--	--	--	--	--	--
i0_HQ_sampled12fd9_c10894_f2p0_703	--	--	--	--	--	--	--	--	--	--	--	--	--	--	--	--	--	--	--	--	--
i0_HQ_sampled12fd9_c10928_f4p9_463	--	--	--	--	--	--	--	--	--	--	--	--	--	--	--	--	--	--	--	--	--
i0_HQ_sampled12fd9_c10994_f4p2_825	--	--	--	--	--	--	--	--	--	--	--	--	--	--	--	--	--	--	--	--	--
i0_HQ_sampled12fd9_c10996_f2p0_646	--	--	--	--	--	--	--	--	--	--	--	--	--	--	--	--	--	--	--	--	--
i0_HQ_sampled12fd9_c11073_f2p0_332	--	--	--	--	--	--	--	--	--	--	--	--	--	--	--	--	--	--	--	--	--
i0_HQ_sampled12fd9_c1107_f3p0_390	--	--	--	--	--	--	--	--	--	--	--	--	--	--	--	--	--	--	--	--	--
i0_HQ_sampled12fd9_c1110_f6p0_769	--	--	--	--	--	--	--	--	--	--	--	--	--	--	--	--	--	--	--	--	--
i0_HQ_sampled12fd9_c111287_f2p0_233	--	--	--	--	--	--	--	--	--	--	--	--	--	--	--	--	--	--	--	--	--
i0_HQ_sampled12fd9_c11141_f8p0_655	gi|332373212|gb|AEE61747.1|	unknown [Dendroctonus ponderosae]	Q24320.1	RecName: Full=DNA-directed RNA polymerases I, II, and III subunit RPABC2; Short=RNA polymerases I, II, and III subunit ABC2; AltName: Full=RPB6 homolog	tca:664251	K03014	RPB6, POLR2F	DNA-directed RNA polymerases I, II, and III subunit RPABC2	ko03020|ko04623|ko00230|ko00240	RNA polymerase|Cytosolic DNA-sensing pathway|Purine metabolism|Pyrimidine metabolism	--	--	--	--	--	K	COG1758	Promotes RNA polymerase assembly. Latches the N- and C- terminal regions of the beta' subunit thereby facilitating its interaction with the beta and alpha subunits (By similarity)	Molecular Function: DNA binding (GO:0003677);|Molecular Function: DNA-directed 5'-3' RNA polymerase activity (GO:0003899);|Cellular Component: DNA-directed RNA polymerase II, core complex (GO:0005665);|Biological Process: transcription, DNA-templated (GO:0006351);	--	--
i0_HQ_sampled12fd9_c11150_f3p0_413	--	--	--	--	--	--	--	--	--	--	--	--	--	--	--	--	--	--	--	--	--
i0_HQ_sampled12fd9_c11156_f2p0_487	--	--	--	--	--	--	--	--	--	--	--	--	--	--	--	--	--	--	--	--	--
i0_HQ_sampled12fd9_c11158_f2p0_501	--	--	--	--	--	--	--	--	--	--	--	--	--	--	--	--	--	--	--	--	--
i0_HQ_sampled12fd9_c11186_f4p0_336	--	--	--	--	--	--	--	--	--	--	--	--	--	--	--	--	--	--	--	--	--
i0_HQ_sampled12fd9_c11203_f7p0_695	gi|46575823|dbj|BAD16776.1|	calcification-associated peptide-2 [Procambarus clarkii]	P81589.1	RecName: Full=Cuticle protein CP575; Short=CPCP575	--	--	--	--	--	--	--	--	--	--	--	--	--	--	Molecular Function: structural constituent of cuticle (GO:0042302);	--	--
i0_HQ_sampled12fd9_c11231_f2p0_872	--	--	--	--	--	--	--	--	--	--	--	--	--	--	--	--	--	--	--	--	--
i0_HQ_sampled12fd9_c11248_f2p0_401	--	--	--	--	--	--	--	--	--	--	--	--	--	--	--	--	--	--	--	--	--
i0_HQ_sampled12fd9_c11250_f2p7_343	--	--	--	--	--	--	--	--	--	--	--	--	--	--	--	--	--	--	--	--	--
i0_HQ_sampled12fd9_c11282_f2p0_273	--	--	--	--	--	--	--	--	--	--	--	--	--	--	--	--	--	--	--	--	--
i0_HQ_sampled12fd9_c112_f32p0_951	gi|260796361|ref|XP_002593173.1|	hypothetical protein BRAFLDRAFT_72748 [Branchiostoma floridae]	Q9TSM4.3	RecName: Full=Glutathione S-transferase Mu 2; AltName: Full=GST class-mu 2; AltName: Full=GSTM2-2	bfo:BRAFLDRAFT_72748	K00799	GST, gst	glutathione S-transferase	ko00982|ko00480|ko00980	Drug metabolism - cytochrome P450|Glutathione metabolism|Metabolism of xenobiotics by cytochrome P450	--	--	--	--	--	O	ENOG4110YU0	Glutathione S-transferase, mu	--	--	--
i0_HQ_sampled12fd9_c11315_f2p6_751	--	--	--	--	--	--	--	--	--	--	--	--	--	--	--	--	--	--	--	--	--
i0_HQ_sampled12fd9_c11331_f3p0_959	gi|926654480|ref|XP_013793884.1|	PREDICTED: putative N-acetylated-alpha-linked acidic dipeptidase, partial [Limulus polyphemus]	--	--	--	--	--	--	--	--	--	--	--	--	--	--	--	--	--	--	--
i0_HQ_sampled12fd9_c11336_f2p0_301	--	--	--	--	--	--	--	--	--	--	--	--	--	--	--	--	--	--	--	--	--
i0_HQ_sampled12fd9_c113458_f2p0_360	--	--	--	--	--	--	--	--	--	--	--	--	--	--	--	--	--	--	--	--	--
i0_HQ_sampled12fd9_c11346_f4p0_668	gi|629729692|ref|XP_007824392.1|	hypothetical protein MAA_08203 [Metarhizium robertsii ARSEF 23]	--	--	--	--	--	--	--	--	--	--	--	--	--	--	--	--	--	--	--
i0_HQ_sampled12fd9_c1136_f5p0_554	--	--	--	--	--	--	--	--	--	--	--	--	--	--	--	--	--	--	--	--	--
i0_HQ_sampled12fd9_c11492_f4p0_452	--	--	--	--	--	--	--	--	--	--	--	--	--	--	--	--	--	--	--	--	--
i0_HQ_sampled12fd9_c11563_f2p4_746	--	--	--	--	--	--	--	--	--	--	--	--	--	--	--	--	--	--	--	--	--
i0_HQ_sampled12fd9_c115782_f2p0_956	--	--	--	--	--	--	--	--	--	--	--	--	--	--	--	--	--	--	--	--	--
i0_HQ_sampled12fd9_c1160_f5p0_504	--	--	--	--	--	--	--	--	--	--	--	--	--	--	--	--	--	--	--	--	--
i0_HQ_sampled12fd9_c11631_f3p0_674	--	--	--	--	--	--	--	--	--	--	--	--	--	--	--	--	--	--	--	--	--
i0_HQ_sampled12fd9_c11688_f2p0_777	--	--	--	--	--	--	--	--	--	--	--	--	--	--	--	--	--	--	--	--	--
i0_HQ_sampled12fd9_c11747_f3p0_704	gi|765170200|ref|XP_011471566.1|	PREDICTED: uncharacterized protein LOC105353733 [Oryzias latipes]	--	--	--	--	--	--	--	--	--	--	--	--	--	S	ENOG410Y65V	Retrotransposon protein	--	--	--
i0_HQ_sampled12fd9_c11771_f5p0_439	gi|665811138|ref|XP_008554024.1|	PREDICTED: protein Asterix [Microplitis demolitor]	Q9U516.1	RecName: Full=Protein Asterix	--	--	--	--	--	--	--	--	--	--	--	S	ENOG4111WDX	WD repeat domain 83 opposite strand	--	--	--
i0_HQ_sampled12fd9_c1177_f7p0_951	--	--	--	--	--	--	--	--	--	--	--	--	--	--	--	--	--	--	--	--	--
i0_HQ_sampled12fd9_c11782_f2p0_527	--	--	--	--	--	--	--	--	--	--	--	--	--	--	--	--	--	--	--	--	--
i0_HQ_sampled12fd9_c11801_f6p0_583	gi|966711968|gb|KTG44206.1|	hypothetical protein cypCar_00022029 [Cyprinus carpio]	P53803.1	RecName: Full=DNA-directed RNA polymerases I, II, and III subunit RPABC4; Short=RNA polymerases I, II, and III subunit ABC4; AltName: Full=ABC10-alpha; AltName: Full=DNA-directed RNA polymerase II subunit K; AltName: Full=RNA polymerase II 7.0 kDa subunit; Short=RPB7.0; AltName: Full=RPB10alpha	phd:102322123	K03009	RPB12, POLR2K	DNA-directed RNA polymerases I, II, and III subunit RPABC4	ko03020|ko04623|ko00230|ko00240	RNA polymerase|Cytosolic DNA-sensing pathway|Purine metabolism|Pyrimidine metabolism	--	--	--	--	--	K	COG1996	DNA-dependent RNA polymerase catalyzes the transcription of DNA into RNA using the four ribonucleoside triphosphates as substrates	--	--	--
i0_HQ_sampled12fd9_c11850_f2p10_331	gi|167508662|gb|ABZ81537.1|	chitin binding peritrophin-A domain-containing protein [Artemia franciscana]	--	--	--	--	--	--	--	--	--	--	--	--	--	--	--	--	--	--	--
i0_HQ_sampled12fd9_c118752_f20p0_961	gi|321474219|gb|EFX85184.1|	hypothetical protein DAPPUDRAFT_300212 [Daphnia pulex]	Q9BL19.1	RecName: Full=60S ribosomal protein L17	phu:Phum_PHUM245140	K02880	RP-L17e, RPL17	large subunit ribosomal protein L17e	ko03010	Ribosome	--	--	--	--	--	J	COG0091	The globular domain of the protein is located near the polypeptide exit tunnel on the outside of the subunit, while an extended beta-hairpin is found that lines the wall of the exit tunnel in the center of the 70S ribosome (By similarity)	Molecular Function: structural constituent of ribosome (GO:0003735);|Biological Process: translation (GO:0006412);|Cellular Component: large ribosomal subunit (GO:0015934);	--	--
i0_HQ_sampled12fd9_c118754_f20p0_380	--	--	--	--	--	--	--	--	--	--	--	--	--	--	--	--	--	--	--	--	--
i0_HQ_sampled12fd9_c118757_f33p0_489	gi|541042565|gb|ERG81670.1|	40s ribosomal protein s26 [Ascaris suum]	P61251.3	RecName: Full=40S ribosomal protein S26	loa:LOAG_00472	K02976	RP-S26e, RPS26	small subunit ribosomal protein S26e	ko03010	Ribosome	--	--	--	--	--	J	COG4830	Ribosomal protein	Molecular Function: structural constituent of ribosome (GO:0003735);|Cellular Component: ribosome (GO:0005840);|Biological Process: translation (GO:0006412);	--	--
i0_HQ_sampled12fd9_c118762_f22p0_956	--	--	--	--	--	--	--	--	--	--	--	--	--	--	--	--	--	--	--	--	--
i0_HQ_sampled12fd9_c118770_f40p0_575	gi|328899546|gb|AEB54640.1|	ribosomal protein L24 [Procambarus clarkii]	Q9VJY6.1	RecName: Full=60S ribosomal protein L24	tca:654912	K02896	RP-L24e, RPL24	large subunit ribosomal protein L24e	ko03010	Ribosome	--	--	--	--	--	J	COG2075	Ribosomal protein	Cellular Component: ribosome (GO:0005840);	--	--
i0_HQ_sampled12fd9_c118780_f22p0_658	gi|328899005|gb|AEB54627.1|	trap [Procambarus clarkii]	Q2TBX5.1	RecName: Full=Translocon-associated protein subunit delta; Short=TRAP-delta; AltName: Full=Signal sequence receptor subunit delta; Short=SSR-delta; Flags: Precursor	phu:Phum_PHUM548270	K04571	SSR4	translocon-associated protein subunit delta	ko04141	Protein processing in endoplasmic reticulum	--	--	--	--	--	U	ENOG4111GCB	Signal sequence receptor delta	Cellular Component: endoplasmic reticulum (GO:0005783);|Cellular Component: integral component of membrane (GO:0016021);	--	--
i0_HQ_sampled12fd9_c118797_f11p0_291	gi|913305613|ref|XP_013183199.1|	PREDICTED: translocation protein SEC62 [Amyelois transitella]	Q5R4Q3.1	RecName: Full=Translocation protein SEC62; AltName: Full=Translocation protein 1; Short=TP-1	pxy:105385621	K12275	SEC62	translocation protein SEC62	ko04141|ko03060	Protein processing in endoplasmic reticulum|Protein export	--	--	--	--	--	U	COG5232	translocation protein	--	--	--
i0_HQ_sampled12fd9_c118804_f4p0_491	--	--	--	--	--	--	--	--	--	--	--	--	--	--	--	--	--	--	--	--	--
i0_HQ_sampled12fd9_c118820_f19p0_846	--	--	--	--	--	--	--	--	--	--	--	--	--	--	--	--	--	--	--	--	--
i0_HQ_sampled12fd9_c118825_f2p0_230	--	--	--	--	--	--	--	--	--	--	--	--	--	--	--	--	--	--	--	--	--
i0_HQ_sampled12fd9_c118842_f3p0_903	gi|591385820|ref|XP_007067335.1|	PREDICTED: pulmonary surfactant-associated protein D-like [Chelonia mydas]	Q66S50.1	RecName: Full=Mannose-binding protein C; Short=MBP-C; AltName: Full=MBP1; AltName: Full=Mannan-binding protein; AltName: Full=Mannose-binding lectin; Flags: Precursor	cmy:102944101	K03991	MBL	mannose-binding lectin	ko04610|ko04145	Complement and coagulation cascades|Phagosome	--	--	--	--	--	U	ENOG410XRS3	mannose receptor, C type 1	--	--	--
i0_HQ_sampled12fd9_c118847_f28p0_856	gi|340383261|ref|XP_003390136.1|	PREDICTED: small nuclear ribonucleoprotein Sm D3-like [Amphimedon queenslandica]	O44437.1	RecName: Full=Small nuclear ribonucleoprotein Sm D3; Short=Sm-D3; AltName: Full=snRNP core protein D3	aqu:100638061	K11088	SNRPD3, SMD3	small nuclear ribonucleoprotein D3	ko03040|ko04139	Spliceosome|Regulation of mitophagy - yeast	--	--	--	--	--	K	COG1958	small nuclear ribonucleoprotein	--	--	--
i0_HQ_sampled12fd9_c118859_f2p0_247	--	--	--	--	--	--	--	--	--	--	--	--	--	--	--	--	--	--	--	--	--
i0_HQ_sampled12fd9_c118863_f8p0_822	--	--	--	--	--	--	--	--	--	--	--	--	--	--	--	--	--	--	--	PF01391.17	Collagen triple helix repeat (20 copies)
i0_HQ_sampled12fd9_c118864_f3p0_419	--	--	--	--	--	--	--	--	--	--	--	--	--	--	--	--	--	--	--	--	--
i0_HQ_sampled12fd9_c118869_f2p0_236	--	--	--	--	--	--	--	--	--	--	--	--	--	--	--	--	--	--	--	--	--
i0_HQ_sampled12fd9_c118874_f4p0_422	--	--	--	--	--	--	--	--	--	--	--	--	--	--	--	--	--	--	--	--	--
i0_HQ_sampled12fd9_c118883_f6p0_462	gi|1048010365|ref|XP_017466003.1|	PREDICTED: uncharacterized protein C7orf73 isoform X2 [Rhagoletis zephyria]	--	--	--	--	--	--	--	--	--	--	--	--	--	S	ENOG410Y604	NA	--	--	--
i0_HQ_sampled12fd9_c118901_f9p0_989	gi|1040777734|gb|JAS03920.1|	putative tubulin beta chain [Pinctada fucata]	P09244.1	RecName: Full=Tubulin beta-7 chain; AltName: Full=Tubulin beta 4'	ptr:471960	K07375	TUBB	tubulin beta	ko04540|ko04145	Gap junction|Phagosome	--	--	--	--	--	Z	COG5023	protein polymerization	--	--	--
i0_HQ_sampled12fd9_c118928_f3p0_683	--	--	--	--	--	--	--	--	--	--	--	--	--	--	--	--	--	--	--	--	--
i0_HQ_sampled12fd9_c118933_f2p0_251	--	--	--	--	--	--	--	--	--	--	--	--	--	--	--	--	--	--	--	--	--
i0_HQ_sampled12fd9_c118936_f2p0_352	--	--	--	--	--	--	--	--	--	--	--	--	--	--	--	--	--	--	--	--	--
i0_HQ_sampled12fd9_c11897_f2p0_900	--	--	--	--	--	--	--	--	--	--	--	--	--	--	--	--	--	--	--	--	--
i0_HQ_sampled12fd9_c119035_f5p0_958	gi|148224367|ref|NP_001088929.1|	ubiquitin conjugating enzyme E2C S homeolog [Xenopus laevis]	P56616.1	RecName: Full=Ubiquitin-conjugating enzyme E2 C; AltName: Full=(E3-independent) E2 ubiquitin-conjugating enzyme C; AltName: Full=E2 ubiquitin-conjugating enzyme C; AltName: Full=UBC-X; AltName: Full=Ubiquitin carrier protein C; AltName: Full=Ubiquitin-protein ligase C	xla:496302	K06688	UBE2C, UBC11	ubiquitin-conjugating enzyme E2 C	ko04120	Ubiquitin mediated proteolysis	KOG0421	Ubiquitin-protein ligase	[O]	CELLULAR PROCESSES AND SIGNALING	Posttranslational modification, protein turnover, chaperones	O	ENOG4111IGV	ubiquitin-conjugating enzyme	Molecular Function: nucleotide binding (GO:0000166);	--	--
i0_HQ_sampled12fd9_c119061_f23p0_995	gi|385100000|ref|YP_006234443.1|	COX1 gene product (mitochondrion) [Gammarus duebeni]	P67794.2	RecName: Full=Cytochrome c oxidase subunit 1; AltName: Full=Cytochrome c oxidase polypeptide I	pxy:20834446	K02256	COX1	cytochrome c oxidase subunit 1	ko00190|ko04260	Oxidative phosphorylation|Cardiac muscle contraction	--	--	--	--	--	C	COG0843	Cytochrome C oxidase subunit I	Molecular Function: cytochrome-c oxidase activity (GO:0004129);|Molecular Function: iron ion binding (GO:0005506);|Cellular Component: mitochondrial inner membrane (GO:0005743);|Biological Process: oxidative phosphorylation (GO:0006119);|Biological Process: aerobic respiration (GO:0009060);|Cellular Component: integral component of membrane (GO:0016021);|Molecular Function: heme binding (GO:00200…	--	--
i0_HQ_sampled12fd9_c119062_f2p0_248	--	--	--	--	--	--	--	--	--	--	--	--	--	--	--	--	--	--	--	--	--
i0_HQ_sampled12fd9_c119068_f2p0_251	--	--	--	--	--	--	--	--	--	--	--	--	--	--	--	--	--	--	--	--	--
i0_HQ_sampled12fd9_c11906_f4p0_712	--	--	--	--	--	--	--	--	--	--	--	--	--	--	--	--	--	--	--	--	--
i0_HQ_sampled12fd9_c119072_f2p0_232	--	--	--	--	--	--	--	--	--	--	--	--	--	--	--	--	--	--	--	--	--
i0_HQ_sampled12fd9_c119093_f2p0_288	--	--	--	--	--	--	--	--	--	--	--	--	--	--	--	--	--	--	--	--	--
i0_HQ_sampled12fd9_c119097_f3p0_257	--	--	--	--	--	--	--	--	--	--	--	--	--	--	--	--	--	--	--	--	--
i0_HQ_sampled12fd9_c119103_f2p0_240	--	--	--	--	--	--	--	--	--	--	--	--	--	--	--	--	--	--	--	--	--
i0_HQ_sampled12fd9_c119148_f21p0_976	gi|957821109|ref|XP_014680868.1|	PREDICTED: 60S ribosomal protein L14-like [Priapulus caudatus]	P55841.1	RecName: Full=60S ribosomal protein L14	sko:100376648	K02875	RP-L14e, RPL14	large subunit ribosomal protein L14e	ko03010	Ribosome	--	--	--	--	--	J	COG2163	(ribosomal) protein	--	--	--
i0_HQ_sampled12fd9_c119151_f40p0_435	gi|321466838|gb|EFX77831.1|	hypothetical protein DAPPUDRAFT_305305 [Daphnia pulex]	--	--	isc:IscW_ISCW004780	K02129	ATPeF0E, ATP5I	F-type H+-transporting ATPase subunit e	ko00190	Oxidative phosphorylation	--	--	--	--	--	Z	ENOG410XYSS	ATP synthase, H transporting, mitochondrial Fo complex, subunit E	--	--	--
i0_HQ_sampled12fd9_c119163_f27p0_356	--	--	--	--	--	--	--	--	--	--	--	--	--	--	--	--	--	--	--	--	--
i0_HQ_sampled12fd9_c119165_f19p0_839	--	--	--	--	--	--	--	--	--	--	--	--	--	--	--	--	--	--	--	--	--
i0_HQ_sampled12fd9_c119173_f31p0_751	gi|298162770|gb|ADI59749.1|	early cuticle protein 1 [Callinectes sapidus]	--	--	--	--	--	--	--	--	--	--	--	--	--	--	--	--	Molecular Function: structural constituent of cuticle (GO:0042302);	--	--
i0_HQ_sampled12fd9_c119182_f42p0_598	gi|942150732|ref|XP_005996772.2|	PREDICTED: 40S ribosomal protein S11 [Latimeria chalumnae]	P61270.3	RecName: Full=40S ribosomal protein S11	lcm:102352218	K02949	RP-S11e, RPS11	small subunit ribosomal protein S11e	ko03010	Ribosome	--	--	--	--	--	J	COG0186	One of the primary rRNA binding proteins, it binds specifically to the 5'-end of 16S ribosomal	Molecular Function: structural constituent of ribosome (GO:0003735);|Cellular Component: ribosome (GO:0005840);|Biological Process: translation (GO:0006412);	--	--
i0_HQ_sampled12fd9_c119187_f22p0_503	gi|242021712|ref|XP_002431287.1|	Brain protein I3, putative [Pediculus humanus corporis]	Q5PPK1.1	RecName: Full=Brain protein I3	--	--	--	--	--	--	--	--	--	--	--	S	ENOG41121JM	Brain protein I3	--	--	--
i0_HQ_sampled12fd9_c119217_f34p0_562	gi|328899750|gb|AEB54647.1|	ribosomal protein S18 [Procambarus clarkii]	Q8ISP0.1	RecName: Full=40S ribosomal protein S18	bfo:BRAFLDRAFT_114927	K02964	RP-S18e, RPS18	small subunit ribosomal protein S18e	ko03010	Ribosome	--	--	--	--	--	J	COG0099	Located at the top of the head of the 30S subunit, it contacts several helices of the 16S rRNA. In the 70S ribosome it contacts the 23S rRNA (bridge B1a) and protein L5 of the 50S subunit (bridge B1b), connecting the 2 subunits	Molecular Function: RNA binding (GO:0003723);|Molecular Function: structural constituent of ribosome (GO:0003735);|Cellular Component: ribosome (GO:0005840);|Biological Process: translation (GO:0006412);	--	--
i0_HQ_sampled12fd9_c119219_f9p0_721	--	--	--	--	--	--	--	--	--	--	--	--	--	--	--	--	--	--	--	--	--
i0_HQ_sampled12fd9_c119228_f25p0_362	--	--	--	--	--	--	--	--	--	--	--	--	--	--	--	--	--	--	--	--	--
i0_HQ_sampled12fd9_c119232_f4p0_602	--	--	--	--	--	--	--	--	--	--	--	--	--	--	--	--	--	--	--	--	--
i0_HQ_sampled12fd9_c119240_f3p8_733	--	--	--	--	--	--	--	--	--	--	--	--	--	--	--	--	--	--	--	--	--
i0_HQ_sampled12fd9_c119245_f4p0_422	--	--	--	--	--	--	--	--	--	--	--	--	--	--	--	--	--	--	--	--	--
i0_HQ_sampled12fd9_c119246_f4p0_367	--	--	--	--	--	--	--	--	--	--	--	--	--	--	--	--	--	--	--	--	--
i0_HQ_sampled12fd9_c119275_f29p0_959	gi|939690920|ref|XP_014289460.1|	PREDICTED: uncharacterized protein LOC106689151 isoform X1 [Halyomorpha halys]	Q9VMM6.2	RecName: Full=Protein obstructor-E; Flags: Precursor	--	--	--	--	--	--	--	--	--	--	--	S	ENOG410XQ49	Chitin binding Peritrophin-A domain	--	--	--
i0_HQ_sampled12fd9_c119304_f6p0_626	--	--	--	--	--	--	--	--	--	--	--	--	--	--	--	--	--	--	--	--	--
i0_HQ_sampled12fd9_c119322_f29p0_895	gi|751813220|gb|AJG01357.1|	cuticular protein 34 [Eriocheir sinensis]	--	--	--	--	--	--	--	--	--	--	--	--	--	--	--	--	Molecular Function: structural constituent of cuticle (GO:0042302);	--	--
i0_HQ_sampled12fd9_c119325_f34p0_394	gi|934153128|gb|KPM03945.1|	60S ribosomal protein L36-like protein [Sarcoptes scabiei]	Q9Y3U8.3	RecName: Full=60S ribosomal protein L36; AltName: Full=Large ribosomal subunit protein eL36	pps:100979039	K02920	RP-L36e, RPL36	large subunit ribosomal protein L36e	ko03010	Ribosome	--	--	--	--	--	J	COG5051	60S ribosomal protein l36	Molecular Function: structural constituent of ribosome (GO:0003735);|Cellular Component: ribosome (GO:0005840);|Biological Process: translation (GO:0006412);	--	--
i0_HQ_sampled12fd9_c119327_f26p0_670	--	--	--	--	--	--	--	--	--	--	--	--	--	--	--	--	--	--	--	--	--
i0_HQ_sampled12fd9_c119380_f29p0_505	gi|308512650|gb|ADO32980.1|	ubiquitin b [Eriocheir sinensis]	P18101.2	RecName: Full=Ubiquitin-60S ribosomal protein L40; AltName: Full=CEP52; Contains: RecName: Full=Ubiquitin; Contains: RecName: Full=60S ribosomal protein L40; Flags: Precursor	sre:PTSG_00610	K02927	RP-L40e, RPL40	large subunit ribosomal protein L40e	ko03010	Ribosome	KOG0003	Ubiquitin/60s ribosomal protein L40 fusion	[J]	INFORMATION STORAGE AND PROCESSING	Translation, ribosomal structure and biogenesis	J	COG1552	Ribosomal protein	Molecular Function: structural constituent of ribosome (GO:0003735);|Cellular Component: ribosome (GO:0005840);|Biological Process: translation (GO:0006412);	--	--
i0_HQ_sampled12fd9_c119393_f25p0_723	--	--	--	--	--	--	--	--	--	--	--	--	--	--	--	--	--	--	--	--	--
i0_HQ_sampled12fd9_c119512_f3p0_408	--	--	--	--	--	--	--	--	--	--	--	--	--	--	--	--	--	--	--	--	--
i0_HQ_sampled12fd9_c119563_f2p0_238	--	--	--	--	--	--	--	--	--	--	--	--	--	--	--	--	--	--	--	--	--
i0_HQ_sampled12fd9_c11964_f3p0_844	--	--	--	--	--	--	--	--	--	--	--	--	--	--	--	--	--	--	--	--	--
i0_HQ_sampled12fd9_c119684_f3p0_845	gi|751868543|ref|YP_009118046.1|	NADH dehydrogenase subunit 5 (mitochondrion) [Brachyuropus grewingkii]	B0FWD3.1	RecName: Full=NADH-ubiquinone oxidoreductase chain 5; AltName: Full=NADH dehydrogenase subunit 5	aag:ND5	K03883	ND5	NADH-ubiquinone oxidoreductase chain 5	ko00190	Oxidative phosphorylation	--	--	--	--	--	C	COG1009	subunit l	Cellular Component: mitochondrial inner membrane (GO:0005743);|Molecular Function: NADH dehydrogenase (ubiquinone) activity (GO:0008137);|Cellular Component: integral component of membrane (GO:0016021);|Biological Process: ATP synthesis coupled electron transport (GO:0042773);|Cellular Component: respiratory chain (GO:0070469);	--	--
i0_HQ_sampled12fd9_c119712_f38p0_756	--	--	--	--	--	--	--	--	--	--	--	--	--	--	--	--	--	--	--	--	--
i0_HQ_sampled12fd9_c119721_f13p0_232	--	--	--	--	--	--	--	--	--	--	--	--	--	--	--	--	--	--	--	--	--
i0_HQ_sampled12fd9_c119726_f20p0_370	gi|298162774|gb|ADI59751.1|	early cuticle protein 3 [Callinectes sapidus]	O02387.1	RecName: Full=Larval cuticle protein LCP-17; Flags: Precursor	--	--	--	--	--	--	--	--	--	--	--	--	--	--	--	--	--
i0_HQ_sampled12fd9_c119738_f2p1_704	gi|3907620|gb|AAC78681.1|	actin 1 [Penaeus monodon]	P49871.1	RecName: Full=Actin, muscle; Flags: Precursor	rro:104675775	K05692	ACTB_G1	actin beta/gamma 1	ko04145|ko04520|ko04670|ko04015|ko04390|ko04611|ko04391|ko04510|ko04745|ko04810|ko04530|ko04919|ko04210|ko04921	Phagosome|Adherens junction|Leukocyte transendothelial migration|Rap1 signaling pathway|Hippo signaling pathway|Platelet activation|Hippo signaling pathway - fly|Focal adhesion|Phototransduction - fly|Regulation of actin cytoskeleton|Tight junction|Thyroid hormone signaling pathway|Apoptosis|Oxytocin signaling pathway	KOG0676	Actin and related proteins	[Z]	CELLULAR PROCESSES AND SIGNALING	Cytoskeleton	Z	COG5277	Actin-related protein	Molecular Function: ATP binding (GO:0005524);	--	--
i0_HQ_sampled12fd9_c11973_f2p0_777	--	--	--	--	--	--	--	--	--	--	--	--	--	--	--	--	--	--	--	--	--
i0_HQ_sampled12fd9_c119779_f14p0_410	--	--	--	--	--	--	--	--	--	--	--	--	--	--	--	--	--	--	--	--	--
i0_HQ_sampled12fd9_c119782_f33p0_566	--	--	--	--	--	--	--	--	--	--	--	--	--	--	--	--	--	--	--	--	--
i0_HQ_sampled12fd9_c11983_f5p3_891	--	--	--	--	--	--	--	--	--	--	--	--	--	--	--	--	--	--	--	--	--
i0_HQ_sampled12fd9_c119870_f13p0_562	--	--	--	--	--	--	--	--	--	--	--	--	--	--	--	--	--	--	--	PF01391.17	Collagen triple helix repeat (20 copies)
i0_HQ_sampled12fd9_c119875_f47p0_439	--	--	--	--	--	--	--	--	--	--	--	--	--	--	--	--	--	--	--	--	--
i0_HQ_sampled12fd9_c119898_f11p0_274	--	--	--	--	--	--	--	--	--	--	--	--	--	--	--	--	--	--	--	--	--
i0_HQ_sampled12fd9_c1198_f20p0_445	--	--	--	--	--	--	--	--	--	--	--	--	--	--	--	--	--	--	--	--	--
i0_HQ_sampled12fd9_c120025_f4p0_756	--	--	--	--	--	--	--	--	--	--	--	--	--	--	--	--	--	--	--	--	--
i0_HQ_sampled12fd9_c12009_f2p0_278	--	--	--	--	--	--	--	--	--	--	--	--	--	--	--	--	--	--	--	--	--
i0_HQ_sampled12fd9_c120320_f5p0_362	--	--	--	--	--	--	--	--	--	--	--	--	--	--	--	--	--	--	--	--	--
i0_HQ_sampled12fd9_c120325_f3p0_910	--	--	--	--	--	--	--	--	--	--	--	--	--	--	--	--	--	--	--	--	--
i0_HQ_sampled12fd9_c120350_f3p0_469	--	--	--	--	--	--	--	--	--	--	--	--	--	--	--	--	--	--	--	--	--
i0_HQ_sampled12fd9_c120367_f5p0_916	--	--	--	--	--	--	--	--	--	--	--	--	--	--	--	--	--	--	--	--	--
i0_HQ_sampled12fd9_c12038_f6p0_746	gi|223006704|gb|ACM69341.1|	CDC28 protein kinase regulatory subunit 1B [Scylla paramamosain]	P61024.1	RecName: Full=Cyclin-dependent kinases regulatory subunit 1; Short=CKS-1	tca:664555	K02219	CKS1	cyclin-dependent kinase regulatory subunit CKS1	ko04111	Cell cycle - yeast	--	--	--	--	--	T	ENOG4111UAN	(Regulatory) subunit	Biological Process: cell cycle (GO:0007049);|Molecular Function: kinase activity (GO:0016301);|Molecular Function: cyclin-dependent protein serine/threonine kinase regulator activity (GO:0016538);|Biological Process: regulation of protein kinase activity (GO:0045859);|Biological Process: cell division (GO:0051301);	--	--
i0_HQ_sampled12fd9_c120417_f3p0_946	--	--	--	--	--	--	--	--	--	--	--	--	--	--	--	--	--	--	--	--	--
i0_HQ_sampled12fd9_c120456_f3p0_485	--	--	--	--	--	--	--	--	--	--	--	--	--	--	--	--	--	--	--	--	--
i0_HQ_sampled12fd9_c120464_f2p0_865	--	--	--	--	--	--	--	--	--	--	--	--	--	--	--	--	--	--	--	--	--
i0_HQ_sampled12fd9_c120469_f2p0_370	--	--	--	--	--	--	--	--	--	--	--	--	--	--	--	--	--	--	--	--	--
i0_HQ_sampled12fd9_c120474_f4p0_485	gi|403333060|gb|EJY65597.1|	hypothetical protein OXYTRI_14248 [Oxytricha trifallax]	--	--	--	--	--	--	--	--	--	--	--	--	--	S	ENOG410Y4XS	NA	--	--	--
i0_HQ_sampled12fd9_c120480_f3p0_331	--	--	--	--	--	--	--	--	--	--	--	--	--	--	--	--	--	--	--	--	--
i0_HQ_sampled12fd9_c120488_f2p0_398	--	--	--	--	--	--	--	--	--	--	--	--	--	--	--	--	--	--	--	--	--
i0_HQ_sampled12fd9_c120505_f2p0_339	--	--	--	--	--	--	--	--	--	--	--	--	--	--	--	--	--	--	--	--	--
i0_HQ_sampled12fd9_c120506_f3p0_446	--	--	--	--	--	--	--	--	--	--	--	--	--	--	--	--	--	--	--	--	--
i0_HQ_sampled12fd9_c120508_f3p0_636	--	--	--	--	--	--	--	--	--	--	--	--	--	--	--	--	--	--	--	--	--
i0_HQ_sampled12fd9_c120548_f3p0_265	--	--	--	--	--	--	--	--	--	--	--	--	--	--	--	--	--	--	--	--	--
i0_HQ_sampled12fd9_c120551_f2p0_840	--	--	--	--	--	--	--	--	--	--	--	--	--	--	--	--	--	--	--	--	--
i0_HQ_sampled12fd9_c120552_f3p0_296	--	--	--	--	--	--	--	--	--	--	--	--	--	--	--	--	--	--	--	--	--
i0_HQ_sampled12fd9_c120555_f4p0_658	gi|919039005|ref|XP_013402998.1|	PREDICTED: 60S ribosomal protein L12-like [Lingula anatina]	P61865.1	RecName: Full=60S ribosomal protein L12	api:100144916	K02870	RP-L12e, RPL12	large subunit ribosomal protein L12e	ko03010	Ribosome	--	--	--	--	--	J	COG0080	This protein binds directly to 23S ribosomal RNA (By similarity)	--	--	--
i0_HQ_sampled12fd9_c120567_f2p0_261	--	--	--	--	--	--	--	--	--	--	--	--	--	--	--	--	--	--	--	--	--
i0_HQ_sampled12fd9_c120579_f2p0_950	gi|155966141|gb|ABU41025.1|	putative cuticle protein [Lepeophtheirus salmonis]	--	--	--	--	--	--	--	--	--	--	--	--	--	S	ENOG4111Y42	Cuticular protein	Cellular Component: extracellular region (GO:0005576);|Biological Process: chitin metabolic process (GO:0006030);|Molecular Function: chitin binding (GO:0008061);	--	--
i0_HQ_sampled12fd9_c120600_f2p0_364	--	--	--	--	--	--	--	--	--	--	--	--	--	--	--	--	--	--	--	--	--
i0_HQ_sampled12fd9_c120605_f2p0_689	--	--	--	--	--	--	--	--	--	--	--	--	--	--	--	--	--	--	--	--	--
i0_HQ_sampled12fd9_c120609_f3p0_643	--	--	--	--	--	--	--	--	--	--	--	--	--	--	--	--	--	--	--	--	--
i0_HQ_sampled12fd9_c120614_f2p0_902	gi|926635365|ref|XP_013783567.1|	PREDICTED: NADH dehydrogenase [ubiquinone] 1 alpha subcomplex subunit 10, mitochondrial-like [Limulus polyphemus]	P91929.2	RecName: Full=NADH dehydrogenase [ubiquinone] 1 alpha subcomplex subunit 10, mitochondrial; AltName: Full=Complex I-42kD; Short=CI-42kD; AltName: Full=NADH-ubiquinone oxidoreductase 42 kDa subunit; Flags: Precursor	tca:660535	K03954	NDUFA10	NADH dehydrogenase (ubiquinone) 1 alpha subcomplex subunit 10	ko00190	Oxidative phosphorylation	--	--	--	--	--	F	ENOG41101CN	NADH dehydrogenase (Ubiquinone) 1 alpha subcomplex	--	--	--
i0_HQ_sampled12fd9_c120617_f6p0_710	--	--	--	--	--	--	--	--	--	--	--	--	--	--	--	--	--	--	--	--	--
i0_HQ_sampled12fd9_c120626_f2p0_257	--	--	--	--	--	--	--	--	--	--	--	--	--	--	--	--	--	--	--	--	--
i0_HQ_sampled12fd9_c120630_f2p0_810	gi|321478949|gb|EFX89905.1|	hypothetical protein DAPPUDRAFT_299805 [Daphnia pulex]	P80007.1	RecName: Full=Crustacyanin-A2 subunit	crg:105320010	K03098	APOD	apolipoprotein D and lipocalin family protein	--	--	--	--	--	--	--	M	COG3040	Outer membrane lipoprotein	--	--	--
i0_HQ_sampled12fd9_c120633_f2p0_535	--	--	--	--	--	--	--	--	--	--	--	--	--	--	--	--	--	--	--	--	--
i0_HQ_sampled12fd9_c120636_f2p0_890	--	--	--	--	--	--	--	--	--	--	--	--	--	--	--	--	--	--	--	--	--
i0_HQ_sampled12fd9_c120645_f2p0_709	--	--	--	--	--	--	--	--	--	--	--	--	--	--	--	--	--	--	--	--	--
i0_HQ_sampled12fd9_c120651_f5p0_270	--	--	--	--	--	--	--	--	--	--	--	--	--	--	--	--	--	--	--	--	--
i0_HQ_sampled12fd9_c120666_f3p0_872	gi|260796361|ref|XP_002593173.1|	hypothetical protein BRAFLDRAFT_72748 [Branchiostoma floridae]	P10649.2	RecName: Full=Glutathione S-transferase Mu 1; AltName: Full=GST 1-1; AltName: Full=GST class-mu 1; AltName: Full=Glutathione S-transferase GT8.7; AltName: Full=pmGT10	bfo:BRAFLDRAFT_72748	K00799	GST, gst	glutathione S-transferase	ko00982|ko00480|ko00980	Drug metabolism - cytochrome P450|Glutathione metabolism|Metabolism of xenobiotics by cytochrome P450	--	--	--	--	--	O	ENOG4110YU0	Glutathione S-transferase, mu	--	--	--
i0_HQ_sampled12fd9_c120672_f2p0_374	--	--	--	--	--	--	--	--	--	--	--	--	--	--	--	--	--	--	--	--	--
i0_HQ_sampled12fd9_c120676_f3p0_483	--	--	--	--	--	--	--	--	--	--	--	--	--	--	--	--	--	--	--	--	--
i0_HQ_sampled12fd9_c120688_f2p0_275	--	--	--	--	--	--	--	--	--	--	--	--	--	--	--	--	--	--	--	--	--
i0_HQ_sampled12fd9_c120699_f2p0_913	--	--	--	--	--	--	--	--	--	--	--	--	--	--	--	--	--	--	--	--	--
i0_HQ_sampled12fd9_c120707_f2p0_271	gi|918399727|dbj|BAS21346.1|	cytochrome c oxidase subunit 1, partial (mitochondrion) [Leptodius sp. FC-2015]	B0FWC7.2	RecName: Full=Cytochrome c oxidase subunit 1; AltName: Full=Cytochrome c oxidase polypeptide I	cqu:COX1	K02256	COX1	cytochrome c oxidase subunit 1	ko00190|ko04260	Oxidative phosphorylation|Cardiac muscle contraction	--	--	--	--	--	C	COG0843	Cytochrome C oxidase subunit I	Molecular Function: cytochrome-c oxidase activity (GO:0004129);|Molecular Function: iron ion binding (GO:0005506);|Cellular Component: mitochondrial inner membrane (GO:0005743);|Biological Process: oxidative phosphorylation (GO:0006119);|Biological Process: aerobic respiration (GO:0009060);|Cellular Component: integral component of membrane (GO:0016021);|Molecular Function: heme binding (GO:00200…	--	--
i0_HQ_sampled12fd9_c120708_f3p0_457	--	--	--	--	--	--	--	--	--	--	--	--	--	--	--	--	--	--	--	--	--
i0_HQ_sampled12fd9_c120709_f2p0_900	--	--	--	--	--	--	--	--	--	--	--	--	--	--	--	--	--	--	--	--	--
i0_HQ_sampled12fd9_c120715_f2p0_931	gi|321463510|gb|EFX74525.1|	hypothetical protein DAPPUDRAFT_307177 [Daphnia pulex]	Q20140.1	RecName: Full=Adenylate kinase isoenzyme 1; Short=AK 1; AltName: Full=ATP-AMP transphosphorylase 1; AltName: Full=ATP:AMP phosphotransferase; AltName: Full=Adenylate monophosphate kinase	tca:662933	K00939	adk, AK	adenylate kinase	ko00230	Purine metabolism	--	--	--	--	--	F	COG0563	Catalyzes the reversible transfer of the terminal phosphate group between ATP and AMP. Plays an important role in cellular energy homeostasis and in adenine nucleotide metabolism (By similarity)	Molecular Function: adenylate kinase activity (GO:0004017);|Molecular Function: ATP binding (GO:0005524);|Cellular Component: cytoplasm (GO:0005737);|Biological Process: ATP metabolic process (GO:0046034);|Biological Process: nucleotide phosphorylation (GO:0046939);	--	--
i0_HQ_sampled12fd9_c120731_f2p0_898	--	--	--	--	--	--	--	--	--	--	--	--	--	--	--	--	--	--	--	--	--
i0_HQ_sampled12fd9_c120739_f2p0_875	--	--	--	--	--	--	--	--	--	--	--	--	--	--	--	--	--	--	--	--	--
i0_HQ_sampled12fd9_c120740_f2p0_395	--	--	--	--	--	--	--	--	--	--	--	--	--	--	--	--	--	--	--	--	--
i0_HQ_sampled12fd9_c12083_f6p0_559	gi|957837085|ref|XP_014668737.1|	PREDICTED: multifunctional methyltransferase subunit TRM112-like protein [Priapulus caudatus]	Q8LFJ5.1	RecName: Full=Multifunctional methyltransferase subunit TRM112-like protein At1g22270; AltName: Full=tRNA methyltransferase 112 homolog	soc:105203335	K15448	TRM112, TRMT112	multifunctional methyltransferase subunit TRM112	--	--	--	--	--	--	--	S	ENOG4111NTJ	tRNA methyltransferase 11-2 homolog	--	--	--
i0_HQ_sampled12fd9_c1208_f5p0_905	gi|998515517|ref|XP_015518494.1|	PREDICTED: proteasome subunit alpha type-7 [Neodiprion lecontei]	Q4R7D9.1	RecName: Full=Proteasome subunit alpha type-7-like	cqu:CpipJ_CPIJ007179	K02731	PSMA7	20S proteasome subunit alpha 4	ko03050	Proteasome	KOG0183	20S proteasome, regulatory subunit alpha type PSMA7/PRE6	[O]	CELLULAR PROCESSES AND SIGNALING	Posttranslational modification, protein turnover, chaperones	O	ENOG410XP21	The proteasome is a multicatalytic proteinase complex which is characterized by its ability to cleave peptides with Arg, Phe, Tyr, Leu, and Glu adjacent to the leaving group at neutral or slightly basic pH. The proteasome has an ATP-dependent proteolytic activity (By similarity)	--	--	--
i0_HQ_sampled12fd9_c121282_f2p0_515	gi|321474219|gb|EFX85184.1|	hypothetical protein DAPPUDRAFT_300212 [Daphnia pulex]	A8CAG3.1	RecName: Full=60S ribosomal protein L17	phu:Phum_PHUM245140	K02880	RP-L17e, RPL17	large subunit ribosomal protein L17e	ko03010	Ribosome	--	--	--	--	--	J	COG0091	The globular domain of the protein is located near the polypeptide exit tunnel on the outside of the subunit, while an extended beta-hairpin is found that lines the wall of the exit tunnel in the center of the 70S ribosome (By similarity)	Molecular Function: structural constituent of ribosome (GO:0003735);|Biological Process: translation (GO:0006412);|Cellular Component: large ribosomal subunit (GO:0015934);	--	--
i0_HQ_sampled12fd9_c1215_f2p0_304	--	--	--	--	--	--	--	--	--	--	--	--	--	--	--	--	--	--	--	--	--
i0_HQ_sampled12fd9_c12163_f2p0_492	--	--	--	--	--	--	--	--	--	--	--	--	--	--	--	--	--	--	--	--	--
i0_HQ_sampled12fd9_c12170_f2p0_873	--	--	--	--	--	--	--	--	--	--	--	--	--	--	--	--	--	--	--	--	--
i0_HQ_sampled12fd9_c12178_f2p0_566	--	--	--	--	--	--	--	--	--	--	--	--	--	--	--	--	--	--	--	--	--
i0_HQ_sampled12fd9_c12203_f3p0_432	--	--	--	--	--	--	--	--	--	--	--	--	--	--	--	--	--	--	--	--	--
i0_HQ_sampled12fd9_c12210_f4p1_504	gi|108773740|gb|ABG11961.1|	tail muscle elongation factor 1 gamma [Procambarus clarkii]	P12261.3	RecName: Full=Elongation factor 1-gamma; Short=EF-1-gamma; AltName: Full=eEF-1B gamma	--	--	--	--	--	--	--	--	--	--	--	O	COG0625	glutathione Stransferase	Molecular Function: translation elongation factor activity (GO:0003746);|Biological Process: translational elongation (GO:0006414);	--	--
i0_HQ_sampled12fd9_c122286_f3p0_908	gi|646711786|gb|KDR16830.1|	60S ribosomal protein L30 [Zootermopsis nevadensis]	P58374.1	RecName: Full=60S ribosomal protein L30	phu:Phum_PHUM167080	K02908	RP-L30e, RPL30	large subunit ribosomal protein L30e	ko03010	Ribosome	--	--	--	--	--	J	COG1911	(ribosomal) protein	Molecular Function: structural constituent of ribosome (GO:0003735);|Cellular Component: ribosome (GO:0005840);|Biological Process: translation (GO:0006412);	--	--
i0_HQ_sampled12fd9_c12229_f9p3_788	gi|815800134|ref|XP_012220717.1|	PREDICTED: oligosaccharyltransferase complex subunit OSTC [Linepithema humile]	Q5M9B7.1	RecName: Full=Oligosaccharyltransferase complex subunit ostc-B	--	--	--	--	--	--	--	--	--	--	--	S	ENOG4111G0G	Oligosaccharyltransferase complex subunit	--	--	--
i0_HQ_sampled12fd9_c12235_f5p2_973	--	--	--	--	--	--	--	--	--	--	--	--	--	--	--	--	--	--	--	--	--
i0_HQ_sampled12fd9_c1223_f4p0_562	--	--	--	--	--	--	--	--	--	--	--	--	--	--	--	--	--	--	--	--	--
i0_HQ_sampled12fd9_c1225_f2p0_836	--	--	--	--	--	--	--	--	--	--	--	--	--	--	--	--	--	--	--	--	--
i0_HQ_sampled12fd9_c12304_f7p0_538	--	--	--	--	--	--	--	--	--	--	--	--	--	--	--	--	--	--	--	--	--
i0_HQ_sampled12fd9_c12314_f2p0_501	--	--	--	--	--	--	--	--	--	--	--	--	--	--	--	--	--	--	--	--	--
i0_HQ_sampled12fd9_c123324_f2p0_795	--	--	--	--	--	--	--	--	--	--	--	--	--	--	--	--	--	--	--	--	--
i0_HQ_sampled12fd9_c123387_f2p0_937	gi|646717463|gb|KDR20307.1|	Histidine triad nucleotide-binding protein 3 [Zootermopsis nevadensis]	Q28BZ2.1	RecName: Full=Histidine triad nucleotide-binding protein 3; Short=HINT-3	--	--	--	--	--	--	--	--	--	--	--	S	ENOG4111MVJ	Histidine triad nucleotide binding protein 3	--	--	--
i0_HQ_sampled12fd9_c123469_f2p0_549	--	--	--	--	--	--	--	--	--	--	--	--	--	--	--	--	--	--	--	--	--
i0_HQ_sampled12fd9_c12360_f2p0_547	--	--	--	--	--	--	--	--	--	--	--	--	--	--	--	--	--	--	--	--	--
i0_HQ_sampled12fd9_c1236_f7p2_992	--	--	--	--	--	--	--	--	--	--	--	--	--	--	--	--	--	--	--	--	--
i0_HQ_sampled12fd9_c12400_f6p0_590	--	--	--	--	--	--	--	--	--	--	--	--	--	--	--	--	--	--	--	--	--
i0_HQ_sampled12fd9_c1240_f14p2_867	gi|942343531|gb|JAN53697.1|	Thiosulfate sulfurtransferase/rhodanese domain-containing protein 1 [Daphnia magna]	P22978.1	RecName: Full=Heat shock protein 67B2	--	--	--	--	--	--	--	--	--	--	--	P	COG0607	Rhodanese domain protein	--	--	--
i0_HQ_sampled12fd9_c1242_f4p0_820	gi|16930529|gb|AAL31950.1|	CDH1-D, partial [Gallus gallus]	--	--	--	--	--	--	--	--	--	--	--	--	--	S	ENOG41129JI	NA	--	--	--
i0_HQ_sampled12fd9_c124310_f3p0_525	--	--	--	--	--	--	--	--	--	--	--	--	--	--	--	--	--	--	--	--	--
i0_HQ_sampled12fd9_c124314_f2p0_444	--	--	--	--	--	--	--	--	--	--	--	--	--	--	--	--	--	--	--	--	--
i0_HQ_sampled12fd9_c12438_f4p0_992	gi|939251808|ref|XP_014245521.1|	PREDICTED: acyl carrier protein, mitochondrial isoform X1 [Cimex lectularius]	Q94519.1	RecName: Full=Acyl carrier protein, mitochondrial; Short=ACP; AltName: Full=NADH-ubiquinone oxidoreductase 9.6 kDa subunit; AltName: Full=NADH-ubiquinone oxidoreductase acyl-carrier subunit; Flags: Precursor	mde:101900705	K03955	NDUFAB1	NADH dehydrogenase (ubiquinone) 1 alpha/beta subcomplex 1	ko00190	Oxidative phosphorylation	--	--	--	--	--	I	COG0236	Carrier of the growing fatty acid chain in fatty acid biosynthesis (By similarity)	--	--	--
i0_HQ_sampled12fd9_c12453_f2p0_399	--	--	--	--	--	--	--	--	--	--	--	--	--	--	--	--	--	--	--	--	--
i0_HQ_sampled12fd9_c1248_f4p0_478	--	--	--	--	--	--	--	--	--	--	--	--	--	--	--	--	--	--	--	--	--
i0_HQ_sampled12fd9_c1249_f2p0_446	--	--	--	--	--	--	--	--	--	--	--	--	--	--	--	--	--	--	--	--	--
i0_HQ_sampled12fd9_c125233_f4p0_916	--	--	--	--	--	--	--	--	--	--	--	--	--	--	--	--	--	--	--	--	--
i0_HQ_sampled12fd9_c125400_f2p0_870	gi|65332126|gb|AAY42205.1|	troponin T [Haemaphysalis qinghaiensis]	P19351.3	RecName: Full=Troponin T, skeletal muscle; AltName: Full=Protein intended thorax; AltName: Full=Protein upheld	phu:Phum_PHUM123120	K12046	TNNT3	troponin T, fast skeletal muscle	--	--	--	--	--	--	--	Z	ENOG410XS6A	Troponin T type	--	--	--
i0_HQ_sampled12fd9_c12544_f2p0_362	--	--	--	--	--	--	--	--	--	--	--	--	--	--	--	--	--	--	--	--	--
i0_HQ_sampled12fd9_c125454_f2p0_589	--	--	--	--	--	--	--	--	--	--	--	--	--	--	--	--	--	--	--	--	--
i0_HQ_sampled12fd9_c125572_f2p0_587	--	--	--	--	--	--	--	--	--	--	--	--	--	--	--	--	--	--	--	--	--
i0_HQ_sampled12fd9_c125723_f2p0_645	--	--	--	--	--	--	--	--	--	--	--	--	--	--	--	--	--	--	--	--	--
i0_HQ_sampled12fd9_c126093_f2p0_402	--	--	--	--	--	--	--	--	--	--	--	--	--	--	--	--	--	--	--	--	--
i0_HQ_sampled12fd9_c126195_f2p0_706	--	--	--	--	--	--	--	--	--	--	--	--	--	--	--	--	--	--	--	--	--
i0_HQ_sampled12fd9_c12648_f3p0_345	--	--	--	--	--	--	--	--	--	--	--	--	--	--	--	--	--	--	--	--	--
i0_HQ_sampled12fd9_c126575_f2p0_637	--	--	--	--	--	--	--	--	--	--	--	--	--	--	--	--	--	--	--	--	--
i0_HQ_sampled12fd9_c12659_f2p0_766	--	--	--	--	--	--	--	--	--	--	--	--	--	--	--	--	--	--	--	--	--
i0_HQ_sampled12fd9_c126808_f2p0_294	--	--	--	--	--	--	--	--	--	--	--	--	--	--	--	--	--	--	--	--	--
i0_HQ_sampled12fd9_c126871_f2p0_342	--	--	--	--	--	--	--	--	--	--	--	--	--	--	--	--	--	--	--	--	--
i0_HQ_sampled12fd9_c12687_f2p15_397	--	--	--	--	--	--	--	--	--	--	--	--	--	--	--	--	--	--	--	--	--
i0_HQ_sampled12fd9_c1268_f5p0_682	--	--	--	--	--	--	--	--	--	--	--	--	--	--	--	--	--	--	--	--	--
i0_HQ_sampled12fd9_c1269_f3p0_516	--	--	--	--	--	--	--	--	--	--	--	--	--	--	--	--	--	--	--	--	--
i0_HQ_sampled12fd9_c1275_f4p2_1000	gi|195436937|ref|XP_002066402.1|	uncharacterized protein Dwil_GK18114 [Drosophila willistoni]	Q9V3Y3.1	RecName: Full=Defense protein l(2)34Fc; Flags: Precursor	--	--	--	--	--	--	--	--	--	--	--	S	ENOG4111QUT	Reeler domain	--	--	--
i0_HQ_sampled12fd9_c127663_f2p0_627	--	--	--	--	--	--	--	--	--	--	--	--	--	--	--	--	--	--	--	--	--
i0_HQ_sampled12fd9_c1276_f5p0_754	gi|1009598037|ref|XP_015927507.1|	PREDICTED: kielin/chordin-like protein [Parasteatoda tepidariorum]	--	--	--	--	--	--	--	--	--	--	--	--	--	--	--	--	--	--	--
i0_HQ_sampled12fd9_c127781_f2p0_783	gi|657534189|ref|XP_008274002.1|	PREDICTED: apolipoprotein D-like [Stegastes partitus]	P05090.1	RecName: Full=Apolipoprotein D; Short=Apo-D; Short=ApoD; Flags: Precursor	xma:102217221	K03098	APOD	apolipoprotein D and lipocalin family protein	--	--	--	--	--	--	--	M	COG3040	Outer membrane lipoprotein	--	--	--
i0_HQ_sampled12fd9_c1278_f2p0_623	--	--	--	--	--	--	--	--	--	--	--	--	--	--	--	--	--	--	--	--	--
i0_HQ_sampled12fd9_c1283_f10p3_923	--	--	--	--	--	--	--	--	--	--	--	--	--	--	--	--	--	--	--	--	--
i0_HQ_sampled12fd9_c12848_f2p0_337	--	--	--	--	--	--	--	--	--	--	--	--	--	--	--	--	--	--	--	--	--
i0_HQ_sampled12fd9_c12853_f2p0_472	--	--	--	--	--	--	--	--	--	--	--	--	--	--	--	--	--	--	--	--	--
i0_HQ_sampled12fd9_c128585_f2p0_696	gi|385843194|gb|AFI80894.1|	F1-ATP synthase gamma subunit [Litopenaeus vannamei]	O01666.2	RecName: Full=ATP synthase subunit gamma, mitochondrial; AltName: Full=F-ATPase gamma subunit; Flags: Precursor	dmo:Dmoj_GI22330	K02136	ATPeF1G, ATP5C1, ATP3	F-type H+-transporting ATPase subunit gamma	ko00190	Oxidative phosphorylation	--	--	--	--	--	C	COG0224	Produces ATP from ADP in the presence of a proton gradient across the membrane. The gamma chain is believed to be important in regulating ATPase activity and the flow of protons through the CF(0) complex (By similarity)	Biological Process: ATP synthesis coupled proton transport (GO:0015986);|Cellular Component: proton-transporting ATP synthase complex, catalytic core F(1) (GO:0045261);|Molecular Function: proton-transporting ATP synthase activity, rotational mechanism (GO:0046933);|Molecular Function: proton-transporting ATPase activity, rotational mechanism (GO:0046961);	--	--
i0_HQ_sampled12fd9_c128845_f3p0_502	--	--	--	--	--	--	--	--	--	--	--	--	--	--	--	--	--	--	--	--	--
i0_HQ_sampled12fd9_c1290_f2p0_433	--	--	--	--	--	--	--	--	--	--	--	--	--	--	--	--	--	--	--	--	--
i0_HQ_sampled12fd9_c12915_f2p8_319	gi|942389749|gb|JAN76804.1|	Polyubiquitin-B, partial [Daphnia magna]	P23398.2	RecName: Full=Polyubiquitin; Contains: RecName: Full=Ubiquitin; Flags: Precursor	--	--	--	--	--	--	KOG0001	Ubiquitin and ubiquitin-like proteins	[OR]	CELLULAR PROCESSES AND SIGNALING|POORLY CHARACTERIZED	Posttranslational modification, protein turnover, chaperones |General function prediction only	O	COG5272	ubiquitin	--	--	--
i0_HQ_sampled12fd9_c1291_f4p0_993	--	--	--	--	--	--	--	--	--	--	--	--	--	--	--	--	--	--	--	--	--
i0_HQ_sampled12fd9_c1292_f7p2_384	--	--	--	--	--	--	--	--	--	--	--	--	--	--	--	--	--	--	--	--	--
i0_HQ_sampled12fd9_c12998_f4p0_800	gi|1012974074|gb|KYQ48414.1|	39S ribosomal protein L35, mitochondrial [Trachymyrmex zeteki]	Q5R9N0.2	RecName: Full=39S ribosomal protein L35, mitochondrial; Short=L35mt; Short=MRP-L35; Flags: Precursor	aec:105154723	K02916	RP-L35, MRPL35, rpmI	large subunit ribosomal protein L35	ko03010	Ribosome	--	--	--	--	--	J	ENOG4111VAN	ribosomal protein L35	--	--	--
i0_HQ_sampled12fd9_c13053_f2p0_824	--	--	--	--	--	--	--	--	--	--	--	--	--	--	--	--	--	--	--	--	--
i0_HQ_sampled12fd9_c13070_f2p0_289	--	--	--	--	--	--	--	--	--	--	--	--	--	--	--	--	--	--	--	--	--
i0_HQ_sampled12fd9_c13076_f3p0_577	gi|321473221|gb|EFX84189.1|	hypothetical protein DAPPUDRAFT_315173 [Daphnia pulex]	--	--	--	--	--	--	--	--	--	--	--	--	--	S	ENOG410Y5JB	NA	--	--	--
i0_HQ_sampled12fd9_c130899_f2p0_855	gi|985420377|ref|XP_015375652.1|	PREDICTED: serine/arginine-rich splicing factor 7-like [Diuraphis noxia]	Q8BL97.1	RecName: Full=Serine/arginine-rich splicing factor 7; AltName: Full=Splicing factor, arginine/serine-rich 7	api:100161801	K12896	SFRS7	splicing factor, arginine/serine-rich 7	ko03040	Spliceosome	KOG0107	Alternative splicing factor SRp20/9G8 (RRM superfamily)	[A]	INFORMATION STORAGE AND PROCESSING	RNA processing and modification	S	ENOG4111N8Y	serine arginine-rich splicing factor	--	--	--
i0_HQ_sampled12fd9_c13101_f2p7_888	--	--	--	--	--	--	--	--	--	--	--	--	--	--	--	--	--	--	--	--	--
i0_HQ_sampled12fd9_c13109_f4p0_656	--	--	--	--	--	--	--	--	--	--	--	--	--	--	--	--	--	--	--	--	--
i0_HQ_sampled12fd9_c1312_f3p0_909	--	--	--	--	--	--	--	--	--	--	--	--	--	--	--	--	--	--	--	--	--
i0_HQ_sampled12fd9_c1317_f2p0_285	--	--	--	--	--	--	--	--	--	--	--	--	--	--	--	--	--	--	--	--	--
i0_HQ_sampled12fd9_c13214_f4p0_731	--	--	--	--	--	--	--	--	--	--	--	--	--	--	--	--	--	--	--	--	--
i0_HQ_sampled12fd9_c13218_f2p7_519	--	--	--	--	--	--	--	--	--	--	--	--	--	--	--	--	--	--	--	--	--
i0_HQ_sampled12fd9_c13233_f3p0_768	gi|391347875|ref|XP_003748179.1|	PREDICTED: histone H1.0-A-like [Metaseiulus occidentalis]	P02256.1	RecName: Full=Histone H1, gonadal	sko:100376640	K11275	H1_5	histone H1/5	--	--	--	--	--	--	--	B	ENOG4112541	Histone cluster 1	--	--	--
i0_HQ_sampled12fd9_c1325_f5p0_316	--	--	--	--	--	--	--	--	--	--	--	--	--	--	--	--	--	--	--	--	--
i0_HQ_sampled12fd9_c13286_f4p0_763	--	--	--	--	--	--	--	--	--	--	--	--	--	--	--	--	--	--	--	--	--
i0_HQ_sampled12fd9_c13290_f4p0_540	--	--	--	--	--	--	--	--	--	--	--	--	--	--	--	--	--	--	--	--	--
i0_HQ_sampled12fd9_c1331_f13p0_379	gi|907711284|ref|XP_013111264.1|	PREDICTED: H/ACA ribonucleoprotein complex subunit 3 [Stomoxys calcitrans]	Q9V5P6.1	RecName: Full=H/ACA ribonucleoprotein complex subunit 3; AltName: Full=Nucleolar protein 10; AltName: Full=Nucleolar protein family A member 3; AltName: Full=snoRNP protein dNop10	mde:101891641	K11130	NOP10, NOLA3	H/ACA ribonucleoprotein complex subunit 3	ko03008	Ribosome biogenesis in eukaryotes	--	--	--	--	--	J	COG2260	rRNA processing	--	--	--
i0_HQ_sampled12fd9_c13323_f2p1_591	gi|169931080|gb|ACB05778.1|	cuticular protein [Artemia franciscana]	--	--	--	--	--	--	--	--	--	--	--	--	--	S	ENOG4111Y42	Cuticular protein	--	--	--
i0_HQ_sampled12fd9_c1336_f6p0_709	--	--	--	--	--	--	--	--	--	--	--	--	--	--	--	--	--	--	--	--	--
i0_HQ_sampled12fd9_c13386_f5p9_689	--	--	--	--	--	--	--	--	--	--	--	--	--	--	--	--	--	--	--	--	--
i0_HQ_sampled12fd9_c1339_f5p1_784	--	--	--	--	--	--	--	--	--	--	--	--	--	--	--	--	--	--	--	--	--
i0_HQ_sampled12fd9_c134095_f2p0_505	--	--	--	--	--	--	--	--	--	--	--	--	--	--	--	--	--	--	--	--	--
i0_HQ_sampled12fd9_c13418_f2p0_507	--	--	--	--	--	--	--	--	--	--	--	--	--	--	--	--	--	--	--	--	--
i0_HQ_sampled12fd9_c13422_f2p0_344	--	--	--	--	--	--	--	--	--	--	--	--	--	--	--	--	--	--	--	--	--
i0_HQ_sampled12fd9_c1345_f11p0_976	--	--	--	--	--	--	--	--	--	--	--	--	--	--	--	--	--	--	--	--	--
i0_HQ_sampled12fd9_c13475_f2p0_949	gi|880924421|ref|XP_012974154.1|	PREDICTED: transcription factor SPT20 homolog isoform X1 [Mesocricetus auratus]	Q7TT00.1	RecName: Full=Transcription factor SPT20 homolog; AltName: Full=p38-interacting protein; Short=p38IP	--	--	--	--	--	--	--	--	--	--	--	S	ENOG410YRYS	Family with sequence similarity 48, member A	--	--	--
i0_HQ_sampled12fd9_c13479_f2p0_595	--	--	--	--	--	--	--	--	--	--	--	--	--	--	--	--	--	--	--	--	--
i0_HQ_sampled12fd9_c1348_f5p0_844	--	--	--	--	--	--	--	--	--	--	--	--	--	--	--	--	--	--	--	--	--
i0_HQ_sampled12fd9_c13507_f3p0_784	--	--	--	--	--	--	--	--	--	--	--	--	--	--	--	--	--	--	--	--	--
i0_HQ_sampled12fd9_c1350_f3p0_955	gi|321478820|gb|EFX89777.1|	hypothetical protein DAPPUDRAFT_303119 [Daphnia pulex]	--	--	--	--	--	--	--	--	--	--	--	--	--	--	--	--	--	--	--
i0_HQ_sampled12fd9_c1353_f12p0_640	--	--	--	--	--	--	--	--	--	--	--	--	--	--	--	--	--	--	--	--	--
i0_HQ_sampled12fd9_c1354_f9p22_759	gi|1012983931|gb|KYQ57604.1|	putative NADH dehydrogenase [ubiquinone] 1 alpha subcomplex subunit 12 [Trachymyrmex zeteki]	--	--	aec:105153484	K11352	NDUFA12	NADH dehydrogenase (ubiquinone) 1 alpha subcomplex subunit 12	ko00190	Oxidative phosphorylation	--	--	--	--	--	I	ENOG4111XVR	NADH dehydrogenase (ubiquinone) activity	--	--	--
i0_HQ_sampled12fd9_c135573_f2p0_382	--	--	--	--	--	--	--	--	--	--	--	--	--	--	--	--	--	--	--	--	--
i0_HQ_sampled12fd9_c13559_f3p26_766	gi|403082248|gb|AFR23100.1|	cytochrome c oxidase subunit 3, partial (mitochondrion) [Brachionus calyciflorus]	P12702.1	RecName: Full=Cytochrome c oxidase subunit 3; AltName: Full=Cytochrome c oxidase polypeptide III	xtr:3283498	K02262	COX3	cytochrome c oxidase subunit 3	ko00190|ko04260	Oxidative phosphorylation|Cardiac muscle contraction	--	--	--	--	--	C	COG1845	Cytochrome C Oxidase, Subunit III	--	--	--
i0_HQ_sampled12fd9_c13567_f2p0_380	--	--	--	--	--	--	--	--	--	--	--	--	--	--	--	--	--	--	--	--	--
i0_HQ_sampled12fd9_c1356_f4p1_437	--	--	--	--	--	--	--	--	--	--	--	--	--	--	--	--	--	--	--	--	--
i0_HQ_sampled12fd9_c1358_f3p6_411	--	--	--	--	--	--	--	--	--	--	--	--	--	--	--	--	--	--	--	--	--
i0_HQ_sampled12fd9_c135973_f2p0_281	--	--	--	--	--	--	--	--	--	--	--	--	--	--	--	--	--	--	--	--	--
i0_HQ_sampled12fd9_c136071_f2p2_308	--	--	--	--	--	--	--	--	--	--	--	--	--	--	--	--	--	--	--	--	--
i0_HQ_sampled12fd9_c13609_f3p0_983	--	--	--	--	--	--	--	--	--	--	--	--	--	--	--	--	--	--	--	--	--
i0_HQ_sampled12fd9_c1360_f3p0_552	--	--	--	--	--	--	--	--	--	--	--	--	--	--	--	--	--	--	--	--	--
i0_HQ_sampled12fd9_c136284_f3p0_331	--	--	--	--	--	--	--	--	--	--	--	--	--	--	--	--	--	--	--	--	--
i0_HQ_sampled12fd9_c13630_f4p14_972	--	--	--	--	--	--	--	--	--	--	--	--	--	--	--	--	--	--	--	--	--
i0_HQ_sampled12fd9_c13640_f3p0_673	--	--	--	--	--	--	--	--	--	--	--	--	--	--	--	--	--	--	--	--	--
i0_HQ_sampled12fd9_c13649_f4p0_822	gi|170038460|ref|XP_001847068.1|	deoxyuridine 5'-triphosphate nucleotidohydrolase [Culex quinquefasciatus]	P33316.4	RecName: Full=Deoxyuridine 5'-triphosphate nucleotidohydrolase, mitochondrial; Short=dUTPase; AltName: Full=dUTP pyrophosphatase; Flags: Precursor	cqu:CpipJ_CPIJ005616	K01520	dut, DUT	dUTP pyrophosphatase	ko00240	Pyrimidine metabolism	--	--	--	--	--	F	COG0756	This enzyme is involved in nucleotide metabolism it produces dUMP, the immediate precursor of thymidine nucleotides and it decreases the intracellular concentration of dUTP so that uracil cannot be incorporated into DNA (By similarity)	Molecular Function: dUTP diphosphatase activity (GO:0004170);|Biological Process: dUTP metabolic process (GO:0046080);	--	--
i0_HQ_sampled12fd9_c136518_f2p0_470	--	--	--	--	--	--	--	--	--	--	--	--	--	--	--	--	--	--	--	--	--
i0_HQ_sampled12fd9_c136522_f3p0_389	gi|817079328|ref|XP_012262075.1|	PREDICTED: leukotriene A-4 hydrolase [Athalia rosae]	Q6S9C8.3	RecName: Full=Leukotriene A-4 hydrolase; Short=LTA-4 hydrolase; AltName: Full=Leukotriene A(4) hydrolase	hst:105186495	K01254	LTA4H	leukotriene-A4 hydrolase	ko00590	Arachidonic acid metabolism	--	--	--	--	--	E	COG0308	aminopeptidase	--	--	--
i0_HQ_sampled12fd9_c1366_f6p0_1000	gi|340711267|ref|XP_003394200.1|	PREDICTED: DNA-directed RNA polymerase II subunit RPB11 [Bombus terrestris]	Q7PVQ9.2	RecName: Full=DNA-directed RNA polymerase II subunit RPB11; Short=RNA polymerase II subunit B11; AltName: Full=DNA-directed RNA polymerase II subunit J	cfo:105258669	K03008	RPB11, POLR2J	DNA-directed RNA polymerase II subunit RPB11	ko00230|ko00240|ko03020	Purine metabolism|Pyrimidine metabolism|RNA polymerase	--	--	--	--	--	K	COG1761	DNA-dependent RNA polymerase catalyzes the transcription of DNA into RNA using the four ribonucleoside triphosphates as substrates	--	--	--
i0_HQ_sampled12fd9_c136770_f2p0_995	gi|998511027|ref|XP_015516017.1|	PREDICTED: 39S ribosomal protein L47, mitochondrial [Neodiprion lecontei]	Q8K2Y7.2	RecName: Full=39S ribosomal protein L47, mitochondrial; Short=L47mt; Short=MRP-L47; Flags: Precursor	cfo:105254116	K17428	MRPL47, NCM1	large subunit ribosomal protein L47	--	--	--	--	--	--	--	J	ENOG41121MX	(ribosomal) protein	--	--	--
i0_HQ_sampled12fd9_c136805_f2p0_391	--	--	--	--	--	--	--	--	--	--	--	--	--	--	--	--	--	--	--	--	--
i0_HQ_sampled12fd9_c1368_f2p0_728	gi|961376740|gb|ALS05114.1|	dolichyl-diphosphooligosaccharide-protein glycosyltransferase subunit DAD1-like protein [Labidocera rotunda]	Q9VLM5.1	RecName: Full=Dolichyl-diphosphooligosaccharide--protein glycosyltransferase subunit DAD1; Short=DAD-1; Short=Defender against cell death 1; Short=Oligosaccharyl transferase subunit DAD1	aag:AaeL_AAEL002183	K12668	OST2, DAD1	oligosaccharyltransferase complex subunit epsilon	ko04141|ko00510|ko00513	Protein processing in endoplasmic reticulum|N-Glycan biosynthesis|Various types of N-glycan biosynthesis	--	--	--	--	--	S	ENOG4111Q2I	dolichyl-diphosphooligosaccharide-protein glycotransferase activity	Molecular Function: dolichyl-diphosphooligosaccharide-protein glycotransferase activity (GO:0004579);|Biological Process: protein glycosylation (GO:0006486);|Cellular Component: oligosaccharyltransferase complex (GO:0008250);|Cellular Component: integral component of membrane (GO:0016021);	--	--
i0_HQ_sampled12fd9_c13712_f3p0_903	--	--	--	--	--	--	--	--	--	--	--	--	--	--	--	--	--	--	--	--	--
i0_HQ_sampled12fd9_c1371_f2p28_547	gi|929123231|ref|XP_013979244.1|	PREDICTED: 60S ribosomal protein L28 isoform X1 [Salmo salar]	Q3T0L7.3	RecName: Full=60S ribosomal protein L28	xma:102232962	K02903	RP-L28e, RPL28	large subunit ribosomal protein L28e	ko03010	Ribosome	--	--	--	--	--	J	ENOG4111T32	protein complex subunit organization	Molecular Function: structural constituent of ribosome (GO:0003735);|Cellular Component: ribosome (GO:0005840);|Biological Process: translation (GO:0006412);	--	--
i0_HQ_sampled12fd9_c13728_f12p0_653	gi|478487051|gb|AGJ03553.1|	defender against apoptotic death [Palaemon carinicauda]	Q9VLM5.1	RecName: Full=Dolichyl-diphosphooligosaccharide--protein glycosyltransferase subunit DAD1; Short=DAD-1; Short=Defender against cell death 1; Short=Oligosaccharyl transferase subunit DAD1	dya:Dyak_GE11027	K12668	OST2, DAD1	oligosaccharyltransferase complex subunit epsilon	ko04141|ko00510|ko00513	Protein processing in endoplasmic reticulum|N-Glycan biosynthesis|Various types of N-glycan biosynthesis	--	--	--	--	--	S	ENOG4111Q2I	dolichyl-diphosphooligosaccharide-protein glycotransferase activity	Molecular Function: dolichyl-diphosphooligosaccharide-protein glycotransferase activity (GO:0004579);|Biological Process: protein glycosylation (GO:0006486);|Cellular Component: oligosaccharyltransferase complex (GO:0008250);|Cellular Component: integral component of membrane (GO:0016021);	--	--
i0_HQ_sampled12fd9_c1372_f7p0_680	--	--	--	--	--	--	--	--	--	--	--	--	--	--	--	--	--	--	--	--	--
i0_HQ_sampled12fd9_c1373_f5p0_358	--	--	--	--	--	--	--	--	--	--	--	--	--	--	--	--	--	--	--	--	--
i0_HQ_sampled12fd9_c13744_f4p0_397	--	--	--	--	--	--	--	--	--	--	--	--	--	--	--	--	--	--	--	--	--
i0_HQ_sampled12fd9_c1374_f6p0_858	gi|46240816|dbj|BAD15065.1|	crustin-like peptide type 4, partial [Marsupenaeus japonicus]	--	--	--	--	--	--	--	--	--	--	--	--	--	--	--	--	Cellular Component: extracellular region (GO:0005576);|Biological Process: negative regulation of peptidase activity (GO:0010466);|Molecular Function: peptidase inhibitor activity (GO:0030414);	--	--
i0_HQ_sampled12fd9_c138040_f2p0_911	--	--	--	--	--	--	--	--	--	--	--	--	--	--	--	--	--	--	--	--	--
i0_HQ_sampled12fd9_c138050_f2p0_793	--	--	--	--	--	--	--	--	--	--	--	--	--	--	--	--	--	--	--	--	--
i0_HQ_sampled12fd9_c138301_f2p0_279	--	--	--	--	--	--	--	--	--	--	--	--	--	--	--	--	--	--	--	--	--
i0_HQ_sampled12fd9_c13845_f3p1_295	--	--	--	--	--	--	--	--	--	--	--	--	--	--	--	--	--	--	--	--	--
i0_HQ_sampled12fd9_c1385_f3p0_558	gi|478859730|gb|AGJ70295.1|	glutathione S-transferases [Macrobrachium nipponense]	P56598.2	RecName: Full=Glutathione S-transferase class-mu 26 kDa isozyme 1; Short=GST1; AltName: Full=Fh1	xla:380534	K00799	GST, gst	glutathione S-transferase	ko00982|ko00480|ko00980	Drug metabolism - cytochrome P450|Glutathione metabolism|Metabolism of xenobiotics by cytochrome P450	--	--	--	--	--	S	ENOG4111JM8	Glutathione S-transferase, N-terminal domain containing protein	--	--	--
i0_HQ_sampled12fd9_c138614_f2p0_984	--	--	--	--	--	--	--	--	--	--	--	--	--	--	--	--	--	--	--	--	--
i0_HQ_sampled12fd9_c138659_f2p0_441	--	--	--	--	--	--	--	--	--	--	--	--	--	--	--	--	--	--	--	--	--
i0_HQ_sampled12fd9_c1386_f2p0_665	--	--	--	--	--	--	--	--	--	--	--	--	--	--	--	--	--	--	--	--	--
i0_HQ_sampled12fd9_c13873_f7p0_882	gi|817186840|ref|XP_012287940.1|	PREDICTED: RING-box protein 1A [Orussus abietinus]	Q9W5E1.1	RecName: Full=RING-box protein 1A; AltName: Full=Regulator of cullins 1a; AltName: Full=dRbx1	nvi:100115578	K03868	RBX1, ROC1	RING-box protein 1	ko04066|ko04114|ko04141|ko04110|ko04341|ko04350|ko04120|ko04111|ko04710|ko03420|ko04310	HIF-1 signaling pathway|Oocyte meiosis|Protein processing in endoplasmic reticulum|Cell cycle|Hedgehog signaling pathway - fly|TGF-beta signaling pathway|Ubiquitin mediated proteolysis|Cell cycle - yeast|Circadian rhythm|Nucleotide excision repair|Wnt signaling pathway	--	--	--	--	--	O	COG5194	protein ubiquitination	--	--	--
i0_HQ_sampled12fd9_c138819_f2p0_479	--	--	--	--	--	--	--	--	--	--	--	--	--	--	--	--	--	--	--	--	--
i0_HQ_sampled12fd9_c13884_f2p0_299	--	--	--	--	--	--	--	--	--	--	--	--	--	--	--	--	--	--	--	--	--
i0_HQ_sampled12fd9_c13893_f4p0_725	--	--	--	--	--	--	--	--	--	--	--	--	--	--	--	--	--	--	--	--	--
i0_HQ_sampled12fd9_c139104_f2p0_350	--	--	--	--	--	--	--	--	--	--	--	--	--	--	--	--	--	--	--	--	--
i0_HQ_sampled12fd9_c1391_f5p0_867	--	--	--	--	--	--	--	--	--	--	--	--	--	--	--	--	--	--	--	--	--
i0_HQ_sampled12fd9_c1392_f10p0_624	--	--	--	--	--	--	--	--	--	--	--	--	--	--	--	--	--	--	--	--	--
i0_HQ_sampled12fd9_c139395_f2p0_482	--	--	--	--	--	--	--	--	--	--	--	--	--	--	--	--	--	--	--	--	--
i0_HQ_sampled12fd9_c13959_f2p2_304	--	--	--	--	--	--	--	--	--	--	--	--	--	--	--	--	--	--	--	--	--
i0_HQ_sampled12fd9_c139671_f2p0_478	--	--	--	--	--	--	--	--	--	--	--	--	--	--	--	--	--	--	--	--	--
i0_HQ_sampled12fd9_c1397_f9p0_922	gi|169931080|gb|ACB05778.1|	cuticular protein [Artemia franciscana]	--	--	--	--	--	--	--	--	--	--	--	--	--	S	ENOG4111Y42	Cuticular protein	--	--	--
i0_HQ_sampled12fd9_c1403_f10p0_377	--	--	--	--	--	--	--	--	--	--	--	--	--	--	--	--	--	--	--	--	--
i0_HQ_sampled12fd9_c14058_f2p0_353	--	--	--	--	--	--	--	--	--	--	--	--	--	--	--	--	--	--	--	--	--
i0_HQ_sampled12fd9_c1405_f2p16_966	--	--	--	--	--	--	--	--	--	--	--	--	--	--	--	--	--	--	--	--	--
i0_HQ_sampled12fd9_c14069_f2p0_639	--	--	--	--	--	--	--	--	--	--	--	--	--	--	--	--	--	--	--	--	--
i0_HQ_sampled12fd9_c14073_f3p0_346	--	--	--	--	--	--	--	--	--	--	--	--	--	--	--	--	--	--	--	--	--
i0_HQ_sampled12fd9_c140802_f2p0_460	gi|954600812|gb|KRZ77772.1|	putative 60S ribosomal protein L37-A, partial [Trichinella papuae]	O44125.3	RecName: Full=60S ribosomal protein L37	tsp:Tsp_02064	K02922	RP-L37e, RPL37	large subunit ribosomal protein L37e	ko03010	Ribosome	--	--	--	--	--	J	COG2126	Binds to the 23S rRNA (By similarity)	Molecular Function: structural constituent of ribosome (GO:0003735);|Cellular Component: ribosome (GO:0005840);|Biological Process: translation (GO:0006412);|Molecular Function: rRNA binding (GO:0019843);|Molecular Function: metal ion binding (GO:0046872);	--	--
i0_HQ_sampled12fd9_c14096_f3p5_648	--	--	--	--	--	--	--	--	--	--	--	--	--	--	--	--	--	--	--	--	--
i0_HQ_sampled12fd9_c141064_f4p0_691	gi|62858011|ref|NP_001016550.1|	zinc finger protein 593 [Xenopus tropicalis]	B0BLT0.1	RecName: Full=Zinc finger protein 593	xtr:549304	K14821	BUD20	bud site selection protein 20	--	--	--	--	--	--	--	S	COG5112	zinc finger protein	Molecular Function: binding (GO:0005488);	--	--
i0_HQ_sampled12fd9_c1411_f3p0_439	gi|1005442675|ref|XP_015758675.1|	PREDICTED: proteasome subunit alpha type-1-like [Acropora digitifera]	O42265.2	RecName: Full=Proteasome subunit alpha type-1; AltName: Full=Macropain subunit C2; AltName: Full=Multicatalytic endopeptidase complex subunit C2; AltName: Full=Proteasome component C2	cin:100183036	K02725	PSMA1	20S proteasome subunit alpha 6	ko03050	Proteasome	--	--	--	--	--	O	COG0638	The proteasome is a multicatalytic proteinase complex which is characterized by its ability to cleave peptides with Arg, Phe, Tyr, Leu, and Glu adjacent to the leaving group at neutral or slightly basic pH. The proteasome has an ATP-dependent proteolytic activity (By similarity)	--	--	--
i0_HQ_sampled12fd9_c141205_f3p0_552	--	--	--	--	--	--	--	--	--	--	--	--	--	--	--	--	--	--	--	--	--
i0_HQ_sampled12fd9_c14149_f2p0_360	--	--	--	--	--	--	--	--	--	--	--	--	--	--	--	--	--	--	--	--	--
i0_HQ_sampled12fd9_c1414_f11p7_828	gi|919099510|ref|XP_013386219.1|	PREDICTED: metal homeostasis factor ATX1-like [Lingula anatina]	Q9TT99.1	RecName: Full=Copper transport protein ATOX1; AltName: Full=Metal transport protein ATX1	cqu:CpipJ_CPIJ015637	K07213	ATOX1, ATX1, copZ, golB	copper chaperone	ko04978	Mineral absorption	--	--	--	--	--	S	COG2608	heavy metal transport detoxification protein	--	--	--
i0_HQ_sampled12fd9_c141509_f2p0_356	--	--	--	--	--	--	--	--	--	--	--	--	--	--	--	--	--	--	--	--	--
i0_HQ_sampled12fd9_c14157_f2p0_476	--	--	--	--	--	--	--	--	--	--	--	--	--	--	--	--	--	--	--	--	--
i0_HQ_sampled12fd9_c1415_f3p0_593	--	--	--	--	--	--	--	--	--	--	--	--	--	--	--	--	--	--	--	--	--
i0_HQ_sampled12fd9_c141633_f3p0_326	--	--	--	--	--	--	--	--	--	--	--	--	--	--	--	--	--	--	--	--	--
i0_HQ_sampled12fd9_c14174_f3p7_531	--	--	--	--	--	--	--	--	--	--	--	--	--	--	--	--	--	--	--	--	--
i0_HQ_sampled12fd9_c141778_f2p0_539	--	--	--	--	--	--	--	--	--	--	--	--	--	--	--	--	--	--	--	--	--
i0_HQ_sampled12fd9_c141887_f2p0_546	--	--	--	--	--	--	--	--	--	--	--	--	--	--	--	--	--	--	--	--	--
i0_HQ_sampled12fd9_c14210_f2p0_336	--	--	--	--	--	--	--	--	--	--	--	--	--	--	--	--	--	--	--	--	--
i0_HQ_sampled12fd9_c14228_f2p0_656	gi|826480942|ref|XP_012538096.1|	PREDICTED: transmembrane protein 18 [Monomorium pharaonis]	Q641M3.1	RecName: Full=Transmembrane protein 18	--	--	--	--	--	--	--	--	--	--	--	S	ENOG41125VK	Transmembrane protein 18	--	--	--
i0_HQ_sampled12fd9_c142313_f2p0_558	--	--	--	--	--	--	--	--	--	--	--	--	--	--	--	--	--	--	--	--	--
i0_HQ_sampled12fd9_c1429_f5p0_901	--	--	--	--	--	--	--	--	--	--	--	--	--	--	--	--	--	--	--	--	--
i0_HQ_sampled12fd9_c1431_f2p0_611	gi|646696815|gb|KDR08855.1|	28S ribosomal protein S18c, mitochondrial [Zootermopsis nevadensis]	P82917.2	RecName: Full=28S ribosomal protein S18c, mitochondrial; Short=MRP-S18-c; Short=Mrps18-c; Short=S18mt-c; AltName: Full=28S ribosomal protein S18-1, mitochondrial; Short=MRP-S18-1; Flags: Precursor	dse:Dsec_GM12877	K02963	RP-S18, MRPS18, rpsR	small subunit ribosomal protein S18	ko03010	Ribosome	--	--	--	--	--	J	COG0238	Binds as a heterodimer with protein S6 to the central domain of the 16S rRNA, where it helps stabilize the platform of the 30S subunit (By similarity)	Cellular Component: intracellular (GO:0005622);	--	--
i0_HQ_sampled12fd9_c14327_f3p0_332	--	--	--	--	--	--	--	--	--	--	--	--	--	--	--	--	--	--	--	--	--
i0_HQ_sampled12fd9_c14355_f2p0_301	--	--	--	--	--	--	--	--	--	--	--	--	--	--	--	--	--	--	--	--	--
i0_HQ_sampled12fd9_c14359_f2p0_856	gi|5921943|sp|P81583.1|CUPC4_CANPG	RecName: Full=Cuticle protein CP1499; Short=CPCP1499 [Cancer pagurus]	P81583.1	RecName: Full=Cuticle protein CP1499; Short=CPCP1499 [Cancer pagurus]	--	--	--	--	--	--	--	--	--	--	--	--	--	--	--	--	--
i0_HQ_sampled12fd9_c1437_f7p0_976	--	--	--	--	--	--	--	--	--	--	--	--	--	--	--	--	--	--	--	--	--
i0_HQ_sampled12fd9_c143917_f2p3_306	--	--	--	--	--	--	--	--	--	--	--	--	--	--	--	--	--	--	--	--	--
i0_HQ_sampled12fd9_c14392_f2p26_670	--	--	--	--	--	--	--	--	--	--	--	--	--	--	--	--	--	--	--	--	--
i0_HQ_sampled12fd9_c14395_f5p2_450	--	--	--	--	--	--	--	--	--	--	--	--	--	--	--	--	--	--	--	--	--
i0_HQ_sampled12fd9_c1439_f3p0_466	--	--	--	--	--	--	--	--	--	--	--	--	--	--	--	--	--	--	--	--	--
i0_HQ_sampled12fd9_c144026_f2p0_279	--	--	--	--	--	--	--	--	--	--	--	--	--	--	--	--	--	--	--	--	--
i0_HQ_sampled12fd9_c144080_f2p0_448	--	--	--	--	--	--	--	--	--	--	--	--	--	--	--	--	--	--	--	--	--
i0_HQ_sampled12fd9_c1443_f13p7_660	--	--	--	--	--	--	--	--	--	--	--	--	--	--	--	--	--	--	--	--	--
i0_HQ_sampled12fd9_c144420_f2p0_281	--	--	--	--	--	--	--	--	--	--	--	--	--	--	--	--	--	--	--	--	--
i0_HQ_sampled12fd9_c144489_f2p0_515	--	--	--	--	--	--	--	--	--	--	--	--	--	--	--	--	--	--	--	--	--
i0_HQ_sampled12fd9_c1444_f3p0_602	--	--	--	--	--	--	--	--	--	--	--	--	--	--	--	--	--	--	--	--	--
i0_HQ_sampled12fd9_c14465_f6p0_759	--	--	--	--	--	--	--	--	--	--	--	--	--	--	--	--	--	--	--	--	--
i0_HQ_sampled12fd9_c144768_f2p0_623	--	--	--	--	--	--	--	--	--	--	--	--	--	--	--	--	--	--	--	--	--
i0_HQ_sampled12fd9_c1447_f3p0_475	--	--	--	--	--	--	--	--	--	--	--	--	--	--	--	--	--	--	--	--	--
i0_HQ_sampled12fd9_c1448_f8p0_259	gi|195059479|ref|XP_001995645.1|	GH17869 [Drosophila grimshawi]	Q9VWH8.2	RecName: Full=Protein kish; Flags: Precursor	--	--	--	--	--	--	--	--	--	--	--	S	ENOG4112243	Transmembrane protein 167A	Cellular Component: integral component of membrane (GO:0016021);	--	--
i0_HQ_sampled12fd9_c1449_f2p21_345	gi|913329021|ref|XP_013196049.1|	PREDICTED: uncharacterized protein LOC106139207 [Amyelois transitella]	--	--	--	--	--	--	--	--	--	--	--	--	--	S	ENOG4111WD1	NA	--	--	--
i0_HQ_sampled12fd9_c1450_f2p0_508	gi|762078681|ref|XP_011455219.1|	PREDICTED: 60S ribosomal protein L27 [Crassostrea gigas]	P61356.2	RecName: Full=60S ribosomal protein L27	crg:105347733	K02901	RP-L27e, RPL27	large subunit ribosomal protein L27e	ko03010	Ribosome	--	--	--	--	--	J	COG2163	(ribosomal) protein	--	--	--
i0_HQ_sampled12fd9_c14534_f2p0_292	--	--	--	--	--	--	--	--	--	--	--	--	--	--	--	--	--	--	--	--	--
i0_HQ_sampled12fd9_c145553_f2p0_640	gi|195113551|ref|XP_002001331.1|	uncharacterized protein Dmoj_GI22032, isoform A [Drosophila mojavensis]	Q21738.2	RecName: Full=Partner of xrn-2 protein 1	--	--	--	--	--	--	--	--	--	--	--	S	COG5048	Zinc finger protein	--	--	--
i0_HQ_sampled12fd9_c145698_f2p0_878	gi|385100003|ref|YP_006234446.1|	ATP6 gene product (mitochondrion) [Gammarus duebeni]	P50269.1	RecName: Full=ATP synthase subunit a; AltName: Full=F-ATPase protein 6	pxy:20834449	K02126	ATPeF0A, MTATP6, ATP6	F-type H+-transporting ATPase subunit a	ko00190	Oxidative phosphorylation	--	--	--	--	--	C	COG0356	it plays a direct role in the translocation of protons across the membrane (By similarity)	Cellular Component: mitochondrial inner membrane (GO:0005743);|Molecular Function: hydrogen ion transmembrane transporter activity (GO:0015078);|Biological Process: ATP synthesis coupled proton transport (GO:0015986);|Cellular Component: integral component of membrane (GO:0016021);	--	--
i0_HQ_sampled12fd9_c14600_f3p0_670	gi|152013691|gb|ABS19961.1|	selenoprotein W2 [Artemia franciscana]	Q9BRT3.1	RecName: Full=Migration and invasion enhancer 1; AltName: Full=HBV X-transactivated gene 4 protein; AltName: Full=HBV XAg-transactivated protein 4; AltName: Full=Protein C35; Flags: Precursor	lcm:102365133	K07401	K07401	selenoprotein W-related protein	--	--	--	--	--	--	--	O	ENOG41127T6	Migration and invasion enhancer 1	--	--	--
i0_HQ_sampled12fd9_c1460_f9p0_929	gi|255653872|gb|ACU25384.1|	crustin 3 [Panulirus japonicus]	--	--	--	--	--	--	--	--	--	--	--	--	--	--	--	--	--	--	--
i0_HQ_sampled12fd9_c146118_f2p0_752	gi|229893634|gb|ACQ90226.1|	heat shock protein 90-2 [Portunus trituberculatus]	P07901.4	RecName: Full=Heat shock protein HSP 90-alpha; AltName: Full=Heat shock 86 kDa; Short=HSP 86; Short=HSP86; AltName: Full=Tumor-specific transplantation 86 kDa antigen; Short=TSTA	isc:IscW_ISCW014265	K04079	htpG, HSP90A	molecular chaperone HtpG	ko04914|ko04915|ko04621|ko04141|ko04626|ko04151|ko04612	Progesterone-mediated oocyte maturation|Estrogen signaling pathway|NOD-like receptor signaling pathway|Protein processing in endoplasmic reticulum|Plant-pathogen interaction|PI3K-Akt signaling pathway|Antigen processing and presentation	KOG0019	Molecular chaperone (HSP90 family)	[O]	CELLULAR PROCESSES AND SIGNALING	Posttranslational modification, protein turnover, chaperones	O	COG0326	Molecular chaperone. Has ATPase activity (By similarity)	Molecular Function: ATP binding (GO:0005524);|Biological Process: protein folding (GO:0006457);|Biological Process: response to stress (GO:0006950);|Molecular Function: unfolded protein binding (GO:0051082);	--	--
i0_HQ_sampled12fd9_c14622_f2p0_930	--	--	--	--	--	--	--	--	--	--	--	--	--	--	--	--	--	--	--	--	--
i0_HQ_sampled12fd9_c14630_f2p0_509	gi|1048059763|ref|XP_017483325.1|	PREDICTED: probable 60S ribosomal protein L37-A [Rhagoletis zephyria]	Q9VXX8.1	RecName: Full=Probable 60S ribosomal protein L37-A	dwi:Dwil_GK16414	K02922	RP-L37e, RPL37	large subunit ribosomal protein L37e	ko03010	Ribosome	--	--	--	--	--	J	COG2126	Binds to the 23S rRNA (By similarity)	--	--	--
i0_HQ_sampled12fd9_c14635_f2p0_458	--	--	--	--	--	--	--	--	--	--	--	--	--	--	--	--	--	--	--	--	--
i0_HQ_sampled12fd9_c1463_f4p0_616	--	--	--	--	--	--	--	--	--	--	--	--	--	--	--	--	--	--	--	--	--
i0_HQ_sampled12fd9_c146413_f2p0_587	--	--	--	--	--	--	--	--	--	--	--	--	--	--	--	--	--	--	--	--	--
i0_HQ_sampled12fd9_c14649_f2p5_441	--	--	--	--	--	--	--	--	--	--	--	--	--	--	--	--	--	--	--	--	--
i0_HQ_sampled12fd9_c14657_f3p0_880	--	--	--	--	--	--	--	--	--	--	--	--	--	--	--	--	--	--	--	--	--
i0_HQ_sampled12fd9_c14668_f3p0_728	gi|749728959|gb|KII74049.1|	Polyubiquitin-C [Thelohanellus kitauei]	P22589.2	RecName: Full=Polyubiquitin; Contains: RecName: Full=Ubiquitin; Flags: Precursor	spu:105436409	K08770	UBC	ubiquitin C	ko03320	PPAR signaling pathway	KOG0001	Ubiquitin and ubiquitin-like proteins	[OR]	CELLULAR PROCESSES AND SIGNALING|POORLY CHARACTERIZED	Posttranslational modification, protein turnover, chaperones |General function prediction only	O	COG5272	ubiquitin	Cellular Component: cytoplasm (GO:0005737);	--	--
i0_HQ_sampled12fd9_c146708_f2p0_957	--	--	--	--	--	--	--	--	--	--	--	--	--	--	--	--	--	--	--	--	--
i0_HQ_sampled12fd9_c14673_f2p0_358	--	--	--	--	--	--	--	--	--	--	--	--	--	--	--	--	--	--	--	--	--
i0_HQ_sampled12fd9_c14676_f3p12_845	--	--	--	--	--	--	--	--	--	--	--	--	--	--	--	--	--	--	--	--	--
i0_HQ_sampled12fd9_c146771_f2p0_327	--	--	--	--	--	--	--	--	--	--	--	--	--	--	--	--	--	--	--	--	--
i0_HQ_sampled12fd9_c1469_f7p0_990	gi|10304437|gb|AAG16253.1|AF300705_1	beta-actin [Litopenaeus vannamei]	P10987.4	RecName: Full=Actin-5C; Flags: Precursor	nvi:100116604	K05692	ACTB_G1	actin beta/gamma 1	ko04145|ko04520|ko04670|ko04015|ko04390|ko04611|ko04391|ko04510|ko04745|ko04810|ko04530|ko04919|ko04210|ko04921	Phagosome|Adherens junction|Leukocyte transendothelial migration|Rap1 signaling pathway|Hippo signaling pathway|Platelet activation|Hippo signaling pathway - fly|Focal adhesion|Phototransduction - fly|Regulation of actin cytoskeleton|Tight junction|Thyroid hormone signaling pathway|Apoptosis|Oxytocin signaling pathway	KOG0676	Actin and related proteins	[Z]	CELLULAR PROCESSES AND SIGNALING	Cytoskeleton	Z	COG5277	Actin-related protein	Molecular Function: ATP binding (GO:0005524);	--	--
i0_HQ_sampled12fd9_c1470_f3p0_357	gi|942412657|gb|JAN88258.1|	hypothetical protein [Daphnia magna]	--	--	ptr:746570	K05692	ACTB_G1	actin beta/gamma 1	ko04145|ko04520|ko04670|ko04015|ko04390|ko04611|ko04391|ko04510|ko04745|ko04810|ko04530|ko04919|ko04210|ko04921	Phagosome|Adherens junction|Leukocyte transendothelial migration|Rap1 signaling pathway|Hippo signaling pathway|Platelet activation|Hippo signaling pathway - fly|Focal adhesion|Phototransduction - fly|Regulation of actin cytoskeleton|Tight junction|Thyroid hormone signaling pathway|Apoptosis|Oxytocin signaling pathway	--	--	--	--	--	S	ENOG4112BYE	protein Sb1514s002010 source	--	--	--
i0_HQ_sampled12fd9_c14713_f3p0_750	--	--	--	--	--	--	--	--	--	--	--	--	--	--	--	--	--	--	--	--	--
i0_HQ_sampled12fd9_c147198_f3p0_804	gi|939262300|ref|XP_014251073.1|	PREDICTED: probable chitinase 3 [Cimex lectularius]	--	--	--	--	--	--	--	--	--	--	--	--	--	S	ENOG4111EXD	chitin binding	--	--	--
i0_HQ_sampled12fd9_c14721_f2p0_289	--	--	--	--	--	--	--	--	--	--	--	--	--	--	--	--	--	--	--	--	--
i0_HQ_sampled12fd9_c147251_f4p0_734	--	--	--	--	--	--	--	--	--	--	--	--	--	--	--	--	--	--	--	--	--
i0_HQ_sampled12fd9_c147297_f2p0_621	gi|169931080|gb|ACB05778.1|	cuticular protein [Artemia franciscana]	--	--	--	--	--	--	--	--	--	--	--	--	--	--	--	--	--	--	--
i0_HQ_sampled12fd9_c14730_f3p0_341	--	--	--	--	--	--	--	--	--	--	--	--	--	--	--	--	--	--	--	--	--
i0_HQ_sampled12fd9_c14766_f3p0_396	--	--	--	--	--	--	--	--	--	--	--	--	--	--	--	--	--	--	--	--	--
i0_HQ_sampled12fd9_c14767_f3p0_427	gi|16611916|gb|AAL27405.1|AF427597_1	chaperonin subunit 1 [Artemia franciscana]	Q5ZJK8.1	RecName: Full=T-complex protein 1 subunit eta; Short=TCP-1-eta; AltName: Full=CCT-eta	cin:100185811	K09499	CCT7	T-complex protein 1 subunit eta	--	--	KOG0361	Chaperonin complex component, TCP-1 eta subunit (CCT7)	[O]	CELLULAR PROCESSES AND SIGNALING	Posttranslational modification, protein turnover, chaperones	O	COG0459	Prevents misfolding and promotes the refolding and proper assembly of unfolded polypeptides generated under stress conditions (By similarity)	Molecular Function: ATP binding (GO:0005524);|Cellular Component: cytoplasm (GO:0005737);|Biological Process: protein folding (GO:0006457);|Molecular Function: unfolded protein binding (GO:0051082);	--	--
i0_HQ_sampled12fd9_c1477_f2p0_785	gi|629729692|ref|XP_007824392.1|	hypothetical protein MAA_08203 [Metarhizium robertsii ARSEF 23]	--	--	--	--	--	--	--	--	--	--	--	--	--	--	--	--	--	--	--
i0_HQ_sampled12fd9_c1479_f2p9_380	--	--	--	--	--	--	--	--	--	--	--	--	--	--	--	--	--	--	--	--	--
i0_HQ_sampled12fd9_c1480_f7p0_465	--	--	--	--	--	--	--	--	--	--	--	--	--	--	--	--	--	--	--	--	--
i0_HQ_sampled12fd9_c148214_f2p0_514	--	--	--	--	--	--	--	--	--	--	--	--	--	--	--	--	--	--	--	--	--
i0_HQ_sampled12fd9_c148392_f2p0_426	--	--	--	--	--	--	--	--	--	--	--	--	--	--	--	--	--	--	--	--	--
i0_HQ_sampled12fd9_c148756_f3p0_787	--	--	--	--	--	--	--	--	--	--	--	--	--	--	--	--	--	--	--	--	--
i0_HQ_sampled12fd9_c148780_f2p0_562	gi|242022739|ref|XP_002431796.1|	Signal recognition particle 14 kDa protein, putative [Pediculus humanus corporis]	P16254.1	RecName: Full=Signal recognition particle 14 kDa protein; Short=SRP14	phu:Phum_PHUM548290	K03104	SRP14	signal recognition particle subunit SRP14	ko03060	Protein export	--	--	--	--	--	U	ENOG4111PSF	signal recognition particle	--	--	--
i0_HQ_sampled12fd9_c148862_f2p0_911	gi|974085886|ref|XP_015240961.1|	PREDICTED: 40S ribosomal protein S4, X isoform [Cyprinodon variegatus]	Q90YS0.3	RecName: Full=40S ribosomal protein S4	mze:101480671	K02987	RP-S4e, RPS4	small subunit ribosomal protein S4e	ko03010	Ribosome	KOG0378	40S ribosomal protein S4	[J]	INFORMATION STORAGE AND PROCESSING	Translation, ribosomal structure and biogenesis	J	COG1471	(ribosomal) protein	--	--	--
i0_HQ_sampled12fd9_c14904_f2p17_664	gi|402593035|gb|EJW86962.1|	hypothetical protein WUBG_02128 [Wuchereria bancrofti]	Q29BX8.2	RecName: Full=CDGSH iron-sulfur domain-containing protein 2 homolog	--	--	--	--	--	--	--	--	--	--	--	S	ENOG41122II	CDGSH iron sulfur domain	--	--	--
i0_HQ_sampled12fd9_c14919_f3p0_905	gi|3915093|sp|Q94571.1|TBB2_HOMAM	RecName: Full=Tubulin beta-2 chain; AltName: Full=Beta-II tubulin	Q94571.1	RecName: Full=Tubulin beta-2 chain; AltName: Full=Beta-II tubulin	cel:CELE_C54C6.2	K07375	TUBB	tubulin beta	ko04540|ko04145	Gap junction|Phagosome	--	--	--	--	--	Z	COG5023	protein polymerization	Molecular Function: GTPase activity (GO:0003924);|Molecular Function: structural constituent of cytoskeleton (GO:0005200);|Molecular Function: GTP binding (GO:0005525);|Cellular Component: cytoplasm (GO:0005737);|Cellular Component: microtubule (GO:0005874);|Biological Process: microtubule-based process (GO:0007017);	--	--
i0_HQ_sampled12fd9_c14935_f2p0_370	--	--	--	--	--	--	--	--	--	--	--	--	--	--	--	--	--	--	--	--	--
i0_HQ_sampled12fd9_c14957_f7p22_547	gi|390350419|ref|XP_786991.2|	PREDICTED: protein NATD1 [Strongylocentrotus purpuratus]	Q66IM5.1	RecName: Full=Protein NATD1; AltName: Full=N-acetyltransferase domain-containing protein 1	spu:581921	K06975	K06975	uncharacterized protein	--	--	--	--	--	--	--	S	ENOG41127NZ	NA	--	--	--
i0_HQ_sampled12fd9_c1496_f3p0_485	--	--	--	--	--	--	--	--	--	--	--	--	--	--	--	--	--	--	--	--	--
i0_HQ_sampled12fd9_c14998_f4p0_438	--	--	--	--	--	--	--	--	--	--	--	--	--	--	--	--	--	--	--	--	--
i0_HQ_sampled12fd9_c14999_f3p0_380	--	--	--	--	--	--	--	--	--	--	--	--	--	--	--	--	--	--	--	--	--
i0_HQ_sampled12fd9_c1499_f3p0_454	--	--	--	--	--	--	--	--	--	--	--	--	--	--	--	--	--	--	--	--	--
i0_HQ_sampled12fd9_c150099_f2p0_650	gi|225717796|gb|ACO14744.1|	General transcription factor IIH subunit 3 [Caligus clemensi]	Q561R7.1	RecName: Full=General transcription factor IIH subunit 3; AltName: Full=General transcription factor IIH polypeptide 3	isc:IscW_ISCW008375	K03143	TFIIH3, GTF2H3, TFB4	transcription initiation factor TFIIH subunit 3	ko03022|ko03420	Basal transcription factors|Nucleotide excision repair	--	--	--	--	--	K	COG5242	Transcription factor	--	--	--
i0_HQ_sampled12fd9_c150112_f2p0_599	--	--	--	--	--	--	--	--	--	--	--	--	--	--	--	--	--	--	--	--	--
i0_HQ_sampled12fd9_c1502_f2p2_553	--	--	--	--	--	--	--	--	--	--	--	--	--	--	--	--	--	--	--	--	--
i0_HQ_sampled12fd9_c15032_f5p0_540	--	--	--	--	--	--	--	--	--	--	--	--	--	--	--	--	--	--	--	--	--
i0_HQ_sampled12fd9_c150424_f2p0_376	--	--	--	--	--	--	--	--	--	--	--	--	--	--	--	--	--	--	--	--	--
i0_HQ_sampled12fd9_c1505_f2p0_553	--	--	--	--	--	--	--	--	--	--	--	--	--	--	--	--	--	--	--	--	--
i0_HQ_sampled12fd9_c15065_f2p3_362	--	--	--	--	--	--	--	--	--	--	--	--	--	--	--	--	--	--	--	--	--
i0_HQ_sampled12fd9_c1507_f3p1_655	--	--	--	--	--	--	--	--	--	--	--	--	--	--	--	--	--	--	--	--	--
i0_HQ_sampled12fd9_c15085_f4p0_778	gi|321476854|gb|EFX87814.1|	hypothetical protein DAPPUDRAFT_306369 [Daphnia pulex]	--	--	--	--	--	--	--	--	--	--	--	--	--	M	COG3040	Outer membrane lipoprotein	--	--	--
i0_HQ_sampled12fd9_c1508_f4p16_514	--	--	--	--	--	--	--	--	--	--	--	--	--	--	--	--	--	--	--	--	--
i0_HQ_sampled12fd9_c15117_f3p0_338	--	--	--	--	--	--	--	--	--	--	--	--	--	--	--	--	--	--	--	--	--
i0_HQ_sampled12fd9_c1511_f3p0_912	--	--	--	--	--	--	--	--	--	--	--	--	--	--	--	--	--	--	--	--	--
i0_HQ_sampled12fd9_c151326_f2p0_702	--	--	--	--	--	--	--	--	--	--	--	--	--	--	--	--	--	--	--	--	--
i0_HQ_sampled12fd9_c15141_f2p0_392	--	--	--	--	--	--	--	--	--	--	--	--	--	--	--	--	--	--	--	--	--
i0_HQ_sampled12fd9_c15188_f2p0_307	gi|321448042|gb|EFX61290.1|	hypothetical protein DAPPUDRAFT_69961 [Daphnia pulex]	P0DJ60.1	RecName: Full=60S ribosomal protein L19	pfh:PFHG_00563	K02885	RP-L19e, RPL19	large subunit ribosomal protein L19e	ko03010	Ribosome	--	--	--	--	--	J	COG2147	ribosomal protein L19	Molecular Function: structural constituent of ribosome (GO:0003735);|Biological Process: translation (GO:0006412);|Cellular Component: cytosolic large ribosomal subunit (GO:0022625);	--	--
i0_HQ_sampled12fd9_c151945_f2p0_816	--	--	--	--	--	--	--	--	--	--	--	--	--	--	--	--	--	--	--	--	--
i0_HQ_sampled12fd9_c152030_f3p3_473	--	--	--	--	--	--	--	--	--	--	--	--	--	--	--	--	--	--	--	--	--
i0_HQ_sampled12fd9_c152032_f2p4_590	--	--	--	--	--	--	--	--	--	--	--	--	--	--	--	--	--	--	--	--	--
i0_HQ_sampled12fd9_c15203_f2p0_371	--	--	--	--	--	--	--	--	--	--	--	--	--	--	--	--	--	--	--	--	--
i0_HQ_sampled12fd9_c152046_f2p0_280	--	--	--	--	--	--	--	--	--	--	--	--	--	--	--	--	--	--	--	--	--
i0_HQ_sampled12fd9_c1520_f2p0_673	--	--	--	--	--	--	--	--	--	--	--	--	--	--	--	--	--	--	--	--	--
i0_HQ_sampled12fd9_c1521_f4p0_573	--	--	--	--	--	--	--	--	--	--	--	--	--	--	--	--	--	--	--	--	--
i0_HQ_sampled12fd9_c1522_f2p0_519	--	--	--	--	--	--	--	--	--	--	--	--	--	--	--	--	--	--	--	--	--
i0_HQ_sampled12fd9_c152355_f2p0_370	--	--	--	--	--	--	--	--	--	--	--	--	--	--	--	--	--	--	--	--	--
i0_HQ_sampled12fd9_c1525_f2p4_915	--	--	--	--	--	--	--	--	--	--	--	--	--	--	--	--	--	--	--	--	--
i0_HQ_sampled12fd9_c152761_f2p0_755	--	--	--	--	--	--	--	--	--	--	--	--	--	--	--	--	--	--	--	--	--
i0_HQ_sampled12fd9_c152900_f2p0_835	--	--	--	--	--	--	--	--	--	--	--	--	--	--	--	--	--	--	--	--	--
i0_HQ_sampled12fd9_c152_f28p0_938	--	--	--	--	--	--	--	--	--	--	--	--	--	--	--	--	--	--	--	--	--
i0_HQ_sampled12fd9_c153413_f2p0_415	--	--	--	--	--	--	--	--	--	--	--	--	--	--	--	--	--	--	--	--	--
i0_HQ_sampled12fd9_c15344_f3p0_845	gi|1040777850|gb|JAS03978.1|	hypothetical protein [Pinctada fucata]	P00993.1	RecName: Full=Chelonianin; AltName: Full=Basic protease inhibitor; AltName: Full=RTPI	--	--	--	--	--	--	--	--	--	--	--	--	--	--	--	--	--
i0_HQ_sampled12fd9_c1534_f2p0_328	--	--	--	--	--	--	--	--	--	--	--	--	--	--	--	--	--	--	--	--	--
i0_HQ_sampled12fd9_c15366_f3p14_725	--	--	--	--	--	--	--	--	--	--	--	--	--	--	--	--	--	--	--	--	--
i0_HQ_sampled12fd9_c1539_f28p0_880	gi|321472092|gb|EFX83063.1|	hypothetical protein DAPPUDRAFT_230730 [Daphnia pulex]	Q6XHI1.1	RecName: Full=Thioredoxin-2; Short=Trx-2	mde:101887490	K03671	trxA	thioredoxin 1	--	--	--	--	--	--	--	O	COG0526	Thioredoxin	Biological Process: sulfate assimilation (GO:0000103);|Cellular Component: mitochondrion (GO:0005739);|Biological Process: protein folding (GO:0006457);|Biological Process: glycerol ether metabolic process (GO:0006662);|Molecular Function: protein disulfide oxidoreductase activity (GO:0015035);|Molecular Function: oxidoreductase activity, acting on a sulfur group of donors, disulfide as acceptor …	--	--
i0_HQ_sampled12fd9_c15479_f3p0_620	gi|193618005|ref|XP_001948977.1|	PREDICTED: T-complex protein 1 subunit gamma-like [Acyrthosiphon pisum]	P49368.4	RecName: Full=T-complex protein 1 subunit gamma; Short=TCP-1-gamma; AltName: Full=CCT-gamma; AltName: Full=hTRiC5	api:100166867	K09495	CCT3, TRIC5	T-complex protein 1 subunit gamma	--	--	KOG0364	Chaperonin complex component, TCP-1 gamma subunit (CCT3)	[O]	CELLULAR PROCESSES AND SIGNALING	Posttranslational modification, protein turnover, chaperones	O	COG0459	Prevents misfolding and promotes the refolding and proper assembly of unfolded polypeptides generated under stress conditions (By similarity)	Molecular Function: ATP binding (GO:0005524);|Cellular Component: cytoplasm (GO:0005737);|Biological Process: protein folding (GO:0006457);|Molecular Function: unfolded protein binding (GO:0051082);	--	--
i0_HQ_sampled12fd9_c1547_f2p0_389	--	--	--	--	--	--	--	--	--	--	--	--	--	--	--	--	--	--	--	--	--
i0_HQ_sampled12fd9_c15487_f4p0_675	gi|9186884|dbj|BAA99543.1|	BCS-1 [Amphibalanus amphitrite]	Q9V7U0.1	RecName: Full=Pro-resilin; Flags: Precursor	--	--	--	--	--	--	--	--	--	--	--	--	--	--	--	--	--
i0_HQ_sampled12fd9_c155190_f2p0_913	--	--	--	--	--	--	--	--	--	--	--	--	--	--	--	--	--	--	--	--	--
i0_HQ_sampled12fd9_c155273_f2p0_492	--	--	--	--	--	--	--	--	--	--	--	--	--	--	--	--	--	--	--	--	--
i0_HQ_sampled12fd9_c15539_f5p0_566	--	--	--	--	--	--	--	--	--	--	--	--	--	--	--	--	--	--	--	--	--
i0_HQ_sampled12fd9_c1553_f10p0_781	--	--	--	--	--	--	--	--	--	--	--	--	--	--	--	--	--	--	--	--	--
i0_HQ_sampled12fd9_c155409_f2p0_703	--	--	--	--	--	--	--	--	--	--	--	--	--	--	--	--	--	--	--	--	--
i0_HQ_sampled12fd9_c155411_f3p0_987	gi|239505087|gb|ACR78689.1|	hypothetical cuticle protein, partial [Rimicaris exoculata]	P81578.1	RecName: Full=Cuticle protein AM1239; Short=CPAM1239	--	--	--	--	--	--	--	--	--	--	--	--	--	--	Molecular Function: structural constituent of cuticle (GO:0042302);	--	--
i0_HQ_sampled12fd9_c155439_f2p0_711	gi|158187860|gb|ABW23219.1|	ribosomal protein rpl13a [Eurythoe complanata]	P35427.2	RecName: Full=60S ribosomal protein L13a	spu:579300	K02872	RP-L13Ae, RPL13A	large subunit ribosomal protein L13Ae	ko03010	Ribosome	--	--	--	--	--	J	COG0102	This protein is one of the early assembly proteins of the 50S ribosomal subunit, although it is not seen to bind rRNA by itself. It is important during the early stages of 50S assembly (By similarity)	--	--	--
i0_HQ_sampled12fd9_c15546_f6p5_707	gi|158187780|gb|ABW23179.1|	ribosomal protein rpl24 [Arenicola marina]	Q9DFQ7.2	RecName: Full=60S ribosomal protein L24	obi:106881060	K02896	RP-L24e, RPL24	large subunit ribosomal protein L24e	ko03010	Ribosome	--	--	--	--	--	J	COG2075	Ribosomal protein	Cellular Component: ribosome (GO:0005840);	--	--
i0_HQ_sampled12fd9_c1557_f6p0_423	gi|942423069|gb|JAN93464.1|	hypothetical protein [Daphnia magna]	--	--	--	--	--	--	--	--	--	--	--	--	--	--	--	--	--	--	--
i0_HQ_sampled12fd9_c15589_f2p0_977	--	--	--	--	--	--	--	--	--	--	--	--	--	--	--	--	--	--	--	--	--
i0_HQ_sampled12fd9_c1558_f4p3_719	--	--	--	--	--	--	--	--	--	--	--	--	--	--	--	--	--	--	--	--	--
i0_HQ_sampled12fd9_c15593_f3p0_576	gi|262401449|gb|ACY66625.1|	eukaryotic translation elongation factor 1 epsilon 1, partial [Scylla paramamosain]	--	--	--	--	--	--	--	--	--	--	--	--	--	--	--	--	--	--	--
i0_HQ_sampled12fd9_c15598_f2p0_495	--	--	--	--	--	--	--	--	--	--	--	--	--	--	--	--	--	--	--	--	--
i0_HQ_sampled12fd9_c156452_f2p0_670	--	--	--	--	--	--	--	--	--	--	--	--	--	--	--	--	--	--	--	--	--
i0_HQ_sampled12fd9_c15647_f2p0_508	--	--	--	--	--	--	--	--	--	--	--	--	--	--	--	--	--	--	--	--	--
i0_HQ_sampled12fd9_c15656_f3p0_863	--	--	--	--	--	--	--	--	--	--	--	--	--	--	--	--	--	--	--	--	--
i0_HQ_sampled12fd9_c1567_f3p0_867	--	--	--	--	--	--	--	--	--	--	--	--	--	--	--	--	--	--	--	--	--
i0_HQ_sampled12fd9_c15716_f2p0_563	--	--	--	--	--	--	--	--	--	--	--	--	--	--	--	--	--	--	--	--	--
i0_HQ_sampled12fd9_c1571_f3p0_927	--	--	--	--	--	--	--	--	--	--	--	--	--	--	--	--	--	--	--	--	--
i0_HQ_sampled12fd9_c15746_f2p0_631	--	--	--	--	--	--	--	--	--	--	--	--	--	--	--	--	--	--	--	--	--
i0_HQ_sampled12fd9_c15762_f4p0_870	gi|170046809|ref|XP_001850941.1|	NADH dehydrogenase [Culex quinquefasciatus]	Q0MQA3.3	RecName: Full=NADH dehydrogenase [ubiquinone] 1 alpha subcomplex subunit 6; AltName: Full=Complex I-B14; Short=CI-B14; AltName: Full=NADH-ubiquinone oxidoreductase B14 subunit	cqu:CpipJ_CPIJ009635	K03950	NDUFA6	NADH dehydrogenase (ubiquinone) 1 alpha subcomplex subunit 6	ko00190	Oxidative phosphorylation	--	--	--	--	--	I	ENOG4111S2F	Accessory subunit of the mitochondrial membrane respiratory chain NADH dehydrogenase (Complex I), that is believed to be not involved in catalysis. Complex I functions in the transfer of electrons from NADH to the respiratory chain. The immediate electron acceptor for the enzyme is believed to be ubiquinone	--	--	--
i0_HQ_sampled12fd9_c15768_f3p0_976	gi|195429900|ref|XP_002062995.1|	uncharacterized protein Dwil_GK21616 [Drosophila willistoni]	Q9H0U6.1	RecName: Full=39S ribosomal protein L18, mitochondrial; Short=L18mt; Short=MRP-L18; AltName: Full=Mitochondrial large ribosomal subunit protein uL18m; Flags: Precursor	dwi:Dwil_GK21616	K02881	RP-L18, MRPL18, rplR	large subunit ribosomal protein L18	ko03010	Ribosome	--	--	--	--	--	J	ENOG4111MCR	Mitochondrial ribosomal protein L18	--	--	--
i0_HQ_sampled12fd9_c1577_f7p0_564	--	--	--	--	--	--	--	--	--	--	--	--	--	--	--	--	--	--	--	--	--
i0_HQ_sampled12fd9_c15798_f4p0_925	gi|1044346051|ref|XP_017378806.1|	PREDICTED: oligoribonuclease, mitochondrial [Cebus capucinus imitator]	A2VE52.1	RecName: Full=Oligoribonuclease, mitochondrial; AltName: Full=RNA exonuclease 2 homolog; AltName: Full=Small fragment nuclease; Flags: Precursor	ocu:100338541	K13288	orn, REX2, REXO2	oligoribonuclease	ko03008	Ribosome biogenesis in eukaryotes	--	--	--	--	--	A	COG1949	3'-to-5' exoribonuclease specific for small oligoribonucleotides (By similarity)	--	--	--
i0_HQ_sampled12fd9_c1581_f10p0_964	gi|169931080|gb|ACB05778.1|	cuticular protein [Artemia franciscana]	--	--	--	--	--	--	--	--	--	--	--	--	--	S	ENOG4111Y42	Cuticular protein	--	--	--
i0_HQ_sampled12fd9_c1583_f11p0_996	gi|16326735|gb|AAL17868.1|AF425264_1	lysozyme precursor [Ornithodoros moubata]	Q17005.2	RecName: Full=Lysozyme c-1; AltName: Full=1,4-beta-N-acetylmuramidase; Flags: Precursor	bfo:BRAFLDRAFT_287383	K13915	LYZ	lysozyme C	ko04970	Salivary secretion	--	--	--	--	--	G	ENOG4111EG8	Sperm acrosome associated 5	Molecular Function: lysozyme activity (GO:0003796);	--	--
i0_HQ_sampled12fd9_c158457_f8p0_234	--	--	--	--	--	--	--	--	--	--	--	--	--	--	--	--	--	--	--	--	--
i0_HQ_sampled12fd9_c15856_f5p1_395	--	--	--	--	--	--	--	--	--	--	--	--	--	--	--	--	--	--	--	--	--
i0_HQ_sampled12fd9_c15861_f5p0_938	gi|961375876|gb|ALS04682.1|	peptidyl-prolyl cis-trans isomerase [Pseudodiaptomus poplesia]	P80311.4	RecName: Full=Peptidyl-prolyl cis-trans isomerase B; Short=PPIase B; AltName: Full=Cyclophilin B; AltName: Full=Rotamase B; AltName: Full=S-cyclophilin; Short=SCYLP; Flags: Precursor	lve:103085766	K03768	PPIB, ppiB	peptidyl-prolyl cis-trans isomerase B (cyclophilin B)	--	--	--	--	--	--	--	O	ENOG410Z0G4	PPIases accelerate the folding of proteins (By similarity)	Biological Process: cellular process (GO:0009987);|Molecular Function: isomerase activity (GO:0016853);	--	--
i0_HQ_sampled12fd9_c15885_f2p0_592	--	--	--	--	--	--	--	--	--	--	--	--	--	--	--	--	--	--	--	--	--
i0_HQ_sampled12fd9_c158867_f9p0_885	--	--	--	--	--	--	--	--	--	--	--	--	--	--	--	--	--	--	--	--	--
i0_HQ_sampled12fd9_c158917_f3p2_911	gi|356713486|gb|AET36897.1|	troponin C2 [Litopenaeus vannamei]	P29290.1	RecName: Full=Troponin C, isoform 2A	--	--	--	--	--	--	KOG0027	Calmodulin and related proteins (EF-Hand superfamily)	[T]	CELLULAR PROCESSES AND SIGNALING	Signal transduction mechanisms	DTZ	COG5126	Calcium-binding protein	Molecular Function: calcium ion binding (GO:0005509);	--	--
i0_HQ_sampled12fd9_c158985_f3p0_229	--	--	--	--	--	--	--	--	--	--	--	--	--	--	--	--	--	--	--	--	--
i0_HQ_sampled12fd9_c1589_f3p0_787	--	--	--	--	--	--	--	--	--	--	--	--	--	--	--	--	--	--	--	--	--
i0_HQ_sampled12fd9_c15907_f8p0_424	--	--	--	--	--	--	--	--	--	--	--	--	--	--	--	--	--	--	--	--	--
i0_HQ_sampled12fd9_c159098_f2p0_238	--	--	--	--	--	--	--	--	--	--	--	--	--	--	--	--	--	--	--	--	--
i0_HQ_sampled12fd9_c159109_f3p0_353	--	--	--	--	--	--	--	--	--	--	--	--	--	--	--	--	--	--	--	--	--
i0_HQ_sampled12fd9_c159112_f2p0_250	--	--	--	--	--	--	--	--	--	--	--	--	--	--	--	--	--	--	--	--	--
i0_HQ_sampled12fd9_c159129_f2p0_236	--	--	--	--	--	--	--	--	--	--	--	--	--	--	--	--	--	--	--	--	--
i0_HQ_sampled12fd9_c159136_f2p0_248	--	--	--	--	--	--	--	--	--	--	--	--	--	--	--	--	--	--	--	--	--
i0_HQ_sampled12fd9_c159166_f2p0_252	--	--	--	--	--	--	--	--	--	--	--	--	--	--	--	--	--	--	--	--	--
i0_HQ_sampled12fd9_c159194_f2p0_237	--	--	--	--	--	--	--	--	--	--	--	--	--	--	--	--	--	--	--	--	--
i0_HQ_sampled12fd9_c1591_f15p0_702	gi|815803436|ref|XP_012222421.1|	PREDICTED: cytochrome b-c1 complex subunit 6, mitochondrial [Linepithema humile]	P00126.2	RecName: Full=Cytochrome b-c1 complex subunit 6, mitochondrial; AltName: Full=Complex III subunit 6; AltName: Full=Complex III subunit VIII; AltName: Full=Cytochrome c1 non-heme 11 kDa protein; AltName: Full=Mitochondrial hinge protein; AltName: Full=Ubiquinol-cytochrome c reductase complex 11 kDa protein; Flags: Precursor	soc:105205432	K00416	QCR6, UQCRH	ubiquinol-cytochrome c reductase subunit 6	ko00190|ko04260	Oxidative phosphorylation|Cardiac muscle contraction	--	--	--	--	--	C	ENOG411247S	This is a component of the ubiquinol-cytochrome c reductase complex (complex III or cytochrome b-c1 complex), which is part of the mitochondrial respiratory chain. This protein may mediate formation of the complex between cytochromes c and c1 (By similarity)	--	--	--
i0_HQ_sampled12fd9_c159205_f2p0_289	--	--	--	--	--	--	--	--	--	--	--	--	--	--	--	--	--	--	--	--	--
i0_HQ_sampled12fd9_c159224_f3p0_954	gi|585716633|ref|XP_002742001.2|	PREDICTED: uncharacterized protein LOC100372598 [Saccoglossus kowalevskii]	Q61830.2	RecName: Full=Macrophage mannose receptor 1; Short=MMR; AltName: CD_antigen=CD206; Flags: Precursor	sko:100372598	K06560	MRC	mannose receptor, C type	ko04145	Phagosome	--	--	--	--	--	U	ENOG410XRS3	mannose receptor, C type 1	--	--	--
i0_HQ_sampled12fd9_c159233_f2p0_359	--	--	--	--	--	--	--	--	--	--	--	--	--	--	--	--	--	--	--	--	--
i0_HQ_sampled12fd9_c159251_f2p0_244	--	--	--	--	--	--	--	--	--	--	--	--	--	--	--	--	--	--	--	--	--
i0_HQ_sampled12fd9_c159269_f2p0_230	--	--	--	--	--	--	--	--	--	--	--	--	--	--	--	--	--	--	--	--	--
i0_HQ_sampled12fd9_c159288_f2p0_229	--	--	--	--	--	--	--	--	--	--	--	--	--	--	--	--	--	--	--	--	--
i0_HQ_sampled12fd9_c159291_f4p5_653	--	--	--	--	--	--	--	--	--	--	--	--	--	--	--	--	--	--	--	--	--
i0_HQ_sampled12fd9_c15936_f3p0_674	--	--	--	--	--	--	--	--	--	--	--	--	--	--	--	--	--	--	--	--	--
i0_HQ_sampled12fd9_c159471_f2p2_524	--	--	--	--	--	--	--	--	--	--	--	--	--	--	--	--	--	--	--	--	--
i0_HQ_sampled12fd9_c1596_f10p1_865	--	--	--	--	--	--	--	--	--	--	--	--	--	--	--	--	--	--	--	--	--
i0_HQ_sampled12fd9_c15988_f2p0_527	gi|928082490|ref|XP_013856113.1|	PREDICTED: uncharacterized protein LOC106511946 [Austrofundulus limnaeus]	--	--	--	--	--	--	--	--	--	--	--	--	--	S	ENOG411206Y	transposon protein	--	--	--
i0_HQ_sampled12fd9_c1599_f3p0_786	--	--	--	--	--	--	--	--	--	--	--	--	--	--	--	--	--	--	--	--	--
i0_HQ_sampled12fd9_c1600_f4p1_765	--	--	--	--	--	--	--	--	--	--	--	--	--	--	--	--	--	--	--	--	--
i0_HQ_sampled12fd9_c1601_f2p1_727	gi|557332941|ref|XP_006039251.1|	PREDICTED: glutaredoxin 2 [Alligator sinensis]	Q923X4.1	RecName: Full=Glutaredoxin-2, mitochondrial; Flags: Precursor	asn:102370375	K03676	grxC, GLRX, GLRX2	glutaredoxin 3	--	--	--	--	--	--	--	O	COG0695	Glutaredoxin	--	--	--
i0_HQ_sampled12fd9_c1604_f3p0_328	--	--	--	--	--	--	--	--	--	--	--	--	--	--	--	--	--	--	--	--	--
i0_HQ_sampled12fd9_c1611_f9p0_342	--	--	--	--	--	--	--	--	--	--	--	--	--	--	--	--	--	--	--	--	--
i0_HQ_sampled12fd9_c16134_f3p0_378	--	--	--	--	--	--	--	--	--	--	--	--	--	--	--	--	--	--	--	--	--
i0_HQ_sampled12fd9_c16152_f2p0_593	--	--	--	--	--	--	--	--	--	--	--	--	--	--	--	--	--	--	--	--	--
i0_HQ_sampled12fd9_c1620_f2p3_398	--	--	--	--	--	--	--	--	--	--	--	--	--	--	--	--	--	--	--	--	--
i0_HQ_sampled12fd9_c1622_f11p2_924	--	--	--	--	--	--	--	--	--	--	--	--	--	--	--	--	--	--	--	--	--
i0_HQ_sampled12fd9_c1625_f7p26_735	gi|91090522|ref|XP_970004.1|	PREDICTED: NADH dehydrogenase [ubiquinone] 1 beta subcomplex subunit 11, mitochondrial [Tribolium castaneum]	--	--	tca:658529	K11351	NDUFB11	NADH dehydrogenase (ubiquinone) 1 beta subcomplex subunit 11	ko00190	Oxidative phosphorylation	--	--	--	--	--	U	ENOG41120A5	NADH dehydrogenase (ubiquinone) 1 beta subcomplex	--	--	--
i0_HQ_sampled12fd9_c1628_f3p0_801	--	--	--	--	--	--	--	--	--	--	--	--	--	--	--	--	--	--	--	--	--
i0_HQ_sampled12fd9_c16317_f3p0_247	--	--	--	--	--	--	--	--	--	--	--	--	--	--	--	--	--	--	--	--	--
i0_HQ_sampled12fd9_c1632_f2p0_812	--	--	--	--	--	--	--	--	--	--	--	--	--	--	--	--	--	--	--	--	--
i0_HQ_sampled12fd9_c1633_f5p0_831	--	--	--	--	--	--	--	--	--	--	--	--	--	--	--	--	--	--	--	--	--
i0_HQ_sampled12fd9_c1636_f7p3_725	gi|156540298|ref|XP_001599008.1|	PREDICTED: protein transport protein Sec61 subunit beta [Nasonia vitripennis]	P60467.2	RecName: Full=Protein transport protein Sec61 subunit beta	phu:Phum_PHUM135860	K09481	SEC61B, SBH2	protein transport protein SEC61 subunit beta	ko04145|ko04141|ko03060	Phagosome|Protein processing in endoplasmic reticulum|Protein export	--	--	--	--	--	U	ENOG4111UAR	protein transport protein SEC61 subunit	Cellular Component: Sec61 translocon complex (GO:0005784);|Biological Process: intracellular protein transport (GO:0006886);|Cellular Component: integral component of membrane (GO:0016021);	--	--
i0_HQ_sampled12fd9_c16371_f2p0_234	gi|401606251|gb|AFP95338.1|	myosin light chain 1 [Procambarus clarkii]	Q24756.1	RecName: Full=Myosin light chain alkali	--	--	--	--	--	--	--	--	--	--	--	DTZ	COG5126	Calcium-binding protein	Molecular Function: calcium ion binding (GO:0005509);	--	--
i0_HQ_sampled12fd9_c1637_f3p0_418	--	--	--	--	--	--	--	--	--	--	--	--	--	--	--	--	--	--	--	--	--
i0_HQ_sampled12fd9_c16399_f4p0_430	--	--	--	--	--	--	--	--	--	--	--	--	--	--	--	--	--	--	--	--	--
i0_HQ_sampled12fd9_c16401_f2p0_263	--	--	--	--	--	--	--	--	--	--	--	--	--	--	--	--	--	--	--	--	--
i0_HQ_sampled12fd9_c1640_f3p0_322	--	--	--	--	--	--	--	--	--	--	--	--	--	--	--	--	--	--	--	--	--
i0_HQ_sampled12fd9_c1647_f4p0_309	--	--	--	--	--	--	--	--	--	--	--	--	--	--	--	--	--	--	--	--	--
i0_HQ_sampled12fd9_c1658_f3p0_316	--	--	--	--	--	--	--	--	--	--	--	--	--	--	--	--	--	--	--	--	--
i0_HQ_sampled12fd9_c1661_f3p0_444	--	--	--	--	--	--	--	--	--	--	--	--	--	--	--	--	--	--	--	--	--
i0_HQ_sampled12fd9_c16666_f2p0_264	--	--	--	--	--	--	--	--	--	--	--	--	--	--	--	--	--	--	--	--	--
i0_HQ_sampled12fd9_c1666_f2p3_420	--	--	--	--	--	--	--	--	--	--	--	--	--	--	--	--	--	--	--	--	--
i0_HQ_sampled12fd9_c1680_f3p8_424	--	--	--	--	--	--	--	--	--	--	--	--	--	--	--	--	--	--	--	--	--
i0_HQ_sampled12fd9_c16976_f2p0_259	--	--	--	--	--	--	--	--	--	--	--	--	--	--	--	--	--	--	--	--	--
i0_HQ_sampled12fd9_c1701_f3p1_408	--	--	--	--	--	--	--	--	--	--	--	--	--	--	--	--	--	--	--	--	--
i0_HQ_sampled12fd9_c17073_f2p0_257	--	--	--	--	--	--	--	--	--	--	--	--	--	--	--	--	--	--	--	--	--
i0_HQ_sampled12fd9_c17153_f2p0_260	gi|3907620|gb|AAC78681.1|	actin 1 [Penaeus monodon]	P49871.1	RecName: Full=Actin, muscle; Flags: Precursor	pxy:105387683	K05692	ACTB_G1	actin beta/gamma 1	ko04145|ko04520|ko04670|ko04015|ko04390|ko04611|ko04391|ko04510|ko04745|ko04810|ko04530|ko04919|ko04210|ko04921	Phagosome|Adherens junction|Leukocyte transendothelial migration|Rap1 signaling pathway|Hippo signaling pathway|Platelet activation|Hippo signaling pathway - fly|Focal adhesion|Phototransduction - fly|Regulation of actin cytoskeleton|Tight junction|Thyroid hormone signaling pathway|Apoptosis|Oxytocin signaling pathway	KOG0676	Actin and related proteins	[Z]	CELLULAR PROCESSES AND SIGNALING	Cytoskeleton	Z	COG5277	Actin-related protein	Molecular Function: ATP binding (GO:0005524);	--	--
i0_HQ_sampled12fd9_c1727_f2p0_384	gi|82795523|gb|ABB91675.1|	calcified cuticle protein CP19.0 isoform B [Callinectes sapidus]	--	--	--	--	--	--	--	--	--	--	--	--	--	--	--	--	--	--	--
i0_HQ_sampled12fd9_c1736_f2p0_312	--	--	--	--	--	--	--	--	--	--	--	--	--	--	--	--	--	--	--	--	--
i0_HQ_sampled12fd9_c17839_f2p0_266	--	--	--	--	--	--	--	--	--	--	--	--	--	--	--	--	--	--	--	--	--
i0_HQ_sampled12fd9_c17950_f3p1_315	--	--	--	--	--	--	--	--	--	--	--	--	--	--	--	--	--	--	--	--	--
i0_HQ_sampled12fd9_c180599_f2p0_682	--	--	--	--	--	--	--	--	--	--	--	--	--	--	--	--	--	--	--	--	--
i0_HQ_sampled12fd9_c181338_f2p0_354	--	--	--	--	--	--	--	--	--	--	--	--	--	--	--	--	--	--	--	--	--
i0_HQ_sampled12fd9_c1820_f3p2_361	--	--	--	--	--	--	--	--	--	--	--	--	--	--	--	--	--	--	--	--	--
i0_HQ_sampled12fd9_c1830_f2p0_591	gi|1009370791|gb|KYM95180.1|	Eclosion hormone [Cyphomyrmex costatus]	P25331.2	RecName: Full=Eclosion hormone; AltName: Full=EH; AltName: Full=Ecdysis activator; Flags: Precursor	--	--	--	--	--	--	--	--	--	--	--	S	ENOG41127VB	eclosion hormone	--	--	--
i0_HQ_sampled12fd9_c1838_f4p0_568	--	--	--	--	--	--	--	--	--	--	--	--	--	--	--	--	--	--	--	--	--
i0_HQ_sampled12fd9_c18726_f2p0_262	--	--	--	--	--	--	--	--	--	--	--	--	--	--	--	--	--	--	--	--	--
i0_HQ_sampled12fd9_c18785_f2p0_253	--	--	--	--	--	--	--	--	--	--	--	--	--	--	--	--	--	--	--	--	--
i0_HQ_sampled12fd9_c190328_f2p0_385	gi|1040777850|gb|JAS03978.1|	hypothetical protein [Pinctada fucata]	--	--	--	--	--	--	--	--	--	--	--	--	--	--	--	--	--	--	--
i0_HQ_sampled12fd9_c193210_f12p0_347	--	--	--	--	--	--	--	--	--	--	--	--	--	--	--	--	--	--	--	--	--
i0_HQ_sampled12fd9_c193211_f14p0_628	gi|48478825|gb|AAT44737.1|	lysozyme C [Branchiostoma belcheri tsingtauense]	Q17005.2	RecName: Full=Lysozyme c-1; AltName: Full=1,4-beta-N-acetylmuramidase; Flags: Precursor	bfo:BRAFLDRAFT_287383	K13915	LYZ	lysozyme C	ko04970	Salivary secretion	--	--	--	--	--	G	ENOG4111QHM	those in tissues and body fluids are associated with the monocyte- macrophage system and enhance the activity of immunoagents	--	--	--
i0_HQ_sampled12fd9_c193218_f17p0_812	gi|929373335|ref|XP_014096670.1|	PREDICTED: uncharacterized protein LOC106622112 [Bactrocera oleae]	--	--	dmo:Dmoj_GI19985	K03945	NDUFA1	NADH dehydrogenase (ubiquinone) 1 alpha subcomplex subunit 1	ko00190	Oxidative phosphorylation	--	--	--	--	--	C	ENOG410Y7T9	NA	--	--	--
i0_HQ_sampled12fd9_c193241_f7p0_288	--	--	--	--	--	--	--	--	--	--	--	--	--	--	--	--	--	--	--	--	--
i0_HQ_sampled12fd9_c193242_f2p0_707	--	--	--	--	--	--	--	--	--	--	--	--	--	--	--	--	--	--	--	--	--
i0_HQ_sampled12fd9_c193246_f15p0_586	--	--	--	--	--	--	--	--	--	--	--	--	--	--	--	--	--	--	--	--	--
i0_HQ_sampled12fd9_c193247_f20p0_461	gi|823403490|ref|XP_012413135.1|	PREDICTED: transmembrane protein 258 [Trichechus manatus latirostris]	P61165.1	RecName: Full=Transmembrane protein 258	--	--	--	--	--	--	--	--	--	--	--	S	ENOG4111TZ7	Chromosome 11 open reading frame 10	--	--	--
i0_HQ_sampled12fd9_c193257_f16p0_795	gi|121485025|gb|ABM54577.1|	Hsp90 [Penaeus monodon]	P30946.2	RecName: Full=Heat shock protein HSP 90-alpha	ocu:100338694	K04079	htpG, HSP90A	molecular chaperone HtpG	ko04914|ko04915|ko04621|ko04141|ko04626|ko04151|ko04612	Progesterone-mediated oocyte maturation|Estrogen signaling pathway|NOD-like receptor signaling pathway|Protein processing in endoplasmic reticulum|Plant-pathogen interaction|PI3K-Akt signaling pathway|Antigen processing and presentation	KOG0019	Molecular chaperone (HSP90 family)	[O]	CELLULAR PROCESSES AND SIGNALING	Posttranslational modification, protein turnover, chaperones	O	COG0326	Molecular chaperone. Has ATPase activity (By similarity)	Molecular Function: ATP binding (GO:0005524);|Biological Process: protein folding (GO:0006457);|Biological Process: response to stress (GO:0006950);|Molecular Function: unfolded protein binding (GO:0051082);	--	--
i0_HQ_sampled12fd9_c193259_f4p0_566	gi|675846198|ref|XP_009008659.1|	hypothetical protein HELRODRAFT_158302 [Helobdella robusta]	--	--	--	--	--	--	--	--	--	--	--	--	--	S	ENOG4111WD1	NA	--	--	--
i0_HQ_sampled12fd9_c193267_f4p0_591	gi|29134779|dbj|BAC66140.1|	projectin [Procambarus clarkii]	Q23551.3	RecName: Full=Twitchin; AltName: Full=Uncoordinated protein 22	--	--	--	--	--	--	--	--	--	--	--	S	ENOG410XQFD	myosin light chain kinase	Molecular Function: protein kinase activity (GO:0004672);|Molecular Function: ATP binding (GO:0005524);|Biological Process: protein phosphorylation (GO:0006468);	--	--
i0_HQ_sampled12fd9_c193273_f5p0_930	--	--	--	--	--	--	--	--	--	--	--	--	--	--	--	--	--	--	--	--	--
i0_HQ_sampled12fd9_c193288_f3p0_992	--	--	--	--	--	--	--	--	--	--	--	--	--	--	--	--	--	--	--	--	--
i0_HQ_sampled12fd9_c193301_f4p0_315	--	--	--	--	--	--	--	--	--	--	--	--	--	--	--	--	--	--	--	--	--
i0_HQ_sampled12fd9_c193311_f3p0_950	--	--	--	--	--	--	--	--	--	--	--	--	--	--	--	--	--	--	--	--	--
i0_HQ_sampled12fd9_c193314_f4p0_412	--	--	--	--	--	--	--	--	--	--	--	--	--	--	--	--	--	--	--	--	--
i0_HQ_sampled12fd9_c193327_f3p0_995	--	--	--	--	--	--	--	--	--	--	--	--	--	--	--	--	--	--	--	--	--
i0_HQ_sampled12fd9_c193334_f4p0_379	--	--	--	--	--	--	--	--	--	--	--	--	--	--	--	--	--	--	--	--	--
i0_HQ_sampled12fd9_c193339_f4p0_361	--	--	--	--	--	--	--	--	--	--	--	--	--	--	--	--	--	--	--	--	--
i0_HQ_sampled12fd9_c193348_f3p0_873	--	--	--	--	--	--	--	--	--	--	--	--	--	--	--	--	--	--	--	--	--
i0_HQ_sampled12fd9_c193366_f2p0_247	--	--	--	--	--	--	--	--	--	--	--	--	--	--	--	--	--	--	--	--	--
i0_HQ_sampled12fd9_c193368_f2p0_231	--	--	--	--	--	--	--	--	--	--	--	--	--	--	--	--	--	--	--	--	--
i0_HQ_sampled12fd9_c193372_f2p0_245	--	--	--	--	--	--	--	--	--	--	--	--	--	--	--	--	--	--	--	--	--
i0_HQ_sampled12fd9_c193380_f3p0_387	--	--	--	--	--	--	--	--	--	--	--	--	--	--	--	--	--	--	--	--	--
i0_HQ_sampled12fd9_c193399_f4p0_763	--	--	--	--	--	--	--	--	--	--	--	--	--	--	--	--	--	--	--	--	--
i0_HQ_sampled12fd9_c193406_f11p0_600	gi|460838092|dbj|BAM99303.1|	strongly chitin-binding protein-1 [Procambarus clarkii]	O02387.1	RecName: Full=Larval cuticle protein LCP-17; Flags: Precursor	--	--	--	--	--	--	--	--	--	--	--	S	ENOG4111PJ1	Cuticular protein	--	--	--
i0_HQ_sampled12fd9_c193409_f4p0_644	gi|942324135|gb|JAN44000.1|	Cytochrome c oxidase subunit 5B, mitochondrial, partial [Daphnia magna]	Q5REG2.1	RecName: Full=Cytochrome c oxidase subunit 5B, mitochondrial; AltName: Full=Cytochrome c oxidase polypeptide Vb; Flags: Precursor	isc:IscW_ISCW019526	K02265	COX5B	cytochrome c oxidase subunit 5b	ko00190|ko04260	Oxidative phosphorylation|Cardiac muscle contraction	--	--	--	--	--	O	ENOG4111XEM	cytochrome C oxidase	Molecular Function: cytochrome-c oxidase activity (GO:0004129);|Cellular Component: mitochondrial envelope (GO:0005740);|Biological Process: hydrogen ion transmembrane transport (GO:1902600);	--	--
i0_HQ_sampled12fd9_c193411_f3p0_797	--	--	--	--	--	--	--	--	--	--	--	--	--	--	--	--	--	--	--	--	--
i0_HQ_sampled12fd9_c193413_f6p0_732	--	--	--	--	--	--	--	--	--	--	--	--	--	--	--	--	--	--	--	--	--
i0_HQ_sampled12fd9_c193428_f3p0_313	--	--	--	--	--	--	--	--	--	--	--	--	--	--	--	--	--	--	--	--	--
i0_HQ_sampled12fd9_c193433_f2p0_242	--	--	--	--	--	--	--	--	--	--	--	--	--	--	--	--	--	--	--	--	--
i0_HQ_sampled12fd9_c193439_f3p0_927	gi|1022760045|gb|KZS06308.1|	ATP synthase subunit alpha, mitochondrial [Daphnia magna]	P35381.2	RecName: Full=ATP synthase subunit alpha, mitochondrial; AltName: Full=Protein bellwether; Flags: Precursor	bmor:692926	K02132	ATPeF1A, ATP5A1, ATP1	F-type H+-transporting ATPase subunit alpha	ko00190	Oxidative phosphorylation	--	--	--	--	--	C	COG0056	Produces ATP from ADP in the presence of a proton gradient across the membrane. The alpha chain is a regulatory subunit (By similarity)	--	--	--
i0_HQ_sampled12fd9_c193460_f39p0_641	--	--	--	--	--	--	--	--	--	--	--	--	--	--	--	--	--	--	--	--	--
i0_HQ_sampled12fd9_c193464_f2p0_263	--	--	--	--	--	--	--	--	--	--	--	--	--	--	--	--	--	--	--	--	--
i0_HQ_sampled12fd9_c193468_f5p0_677	--	--	--	--	--	--	--	--	--	--	--	--	--	--	--	--	--	--	--	--	--
i0_HQ_sampled12fd9_c193482_f4p0_413	gi|35208833|emb|CAE47485.1|	beta-1,3-glucan binding protein [Homarus gammarus]	Q8N0N3.1	RecName: Full=Beta-1,3-glucan-binding protein; Short=GBP; Flags: Precursor	--	--	--	--	--	--	--	--	--	--	--	G	COG2273	hydrolase family 16	--	--	--
i0_HQ_sampled12fd9_c193488_f3p0_338	--	--	--	--	--	--	--	--	--	--	--	--	--	--	--	--	--	--	--	--	--
i0_HQ_sampled12fd9_c193491_f5p0_310	gi|678139670|gb|KFV08842.1|	hypothetical protein N340_11937, partial [Tauraco erythrolophus]	--	--	--	--	--	--	--	--	--	--	--	--	--	S	ENOG410Y65V	Retrotransposon protein	--	--	--
i0_HQ_sampled12fd9_c193493_f3p0_417	--	--	--	--	--	--	--	--	--	--	--	--	--	--	--	--	--	--	--	--	--
i0_HQ_sampled12fd9_c193514_f3p0_866	--	--	--	--	--	--	--	--	--	--	--	--	--	--	--	--	--	--	--	--	--
i0_HQ_sampled12fd9_c193516_f4p0_411	--	--	--	--	--	--	--	--	--	--	--	--	--	--	--	--	--	--	--	--	--
i0_HQ_sampled12fd9_c193534_f3p0_333	gi|985388303|ref|XP_015378703.1|	PREDICTED: dolichyl-diphosphooligosaccharide--protein glycosyltransferase subunit DAD1 [Diuraphis noxia]	Q9VLM5.1	RecName: Full=Dolichyl-diphosphooligosaccharide--protein glycosyltransferase subunit DAD1; Short=DAD-1; Short=Defender against cell death 1; Short=Oligosaccharyl transferase subunit DAD1	api:100158788	K12668	OST2, DAD1	oligosaccharyltransferase complex subunit epsilon	ko04141|ko00510|ko00513	Protein processing in endoplasmic reticulum|N-Glycan biosynthesis|Various types of N-glycan biosynthesis	--	--	--	--	--	S	ENOG4111Q2I	dolichyl-diphosphooligosaccharide-protein glycotransferase activity	--	--	--
i0_HQ_sampled12fd9_c193535_f15p0_507	--	--	--	--	--	--	--	--	--	--	--	--	--	--	--	--	--	--	--	--	--
i0_HQ_sampled12fd9_c193543_f8p0_834	gi|3907620|gb|AAC78681.1|	actin 1 [Penaeus monodon]	P07836.1	RecName: Full=Actin, muscle-type A1; Flags: Precursor	pxy:105387683	K05692	ACTB_G1	actin beta/gamma 1	ko04145|ko04520|ko04670|ko04015|ko04390|ko04611|ko04391|ko04510|ko04745|ko04810|ko04530|ko04919|ko04210|ko04921	Phagosome|Adherens junction|Leukocyte transendothelial migration|Rap1 signaling pathway|Hippo signaling pathway|Platelet activation|Hippo signaling pathway - fly|Focal adhesion|Phototransduction - fly|Regulation of actin cytoskeleton|Tight junction|Thyroid hormone signaling pathway|Apoptosis|Oxytocin signaling pathway	KOG0676	Actin and related proteins	[Z]	CELLULAR PROCESSES AND SIGNALING	Cytoskeleton	Z	COG5277	Actin-related protein	Molecular Function: ATP binding (GO:0005524);	--	--
i0_HQ_sampled12fd9_c193555_f2p0_288	--	--	--	--	--	--	--	--	--	--	--	--	--	--	--	--	--	--	--	--	--
i0_HQ_sampled12fd9_c193559_f11p0_746	gi|957819118|ref|XP_014673175.1|	PREDICTED: histone H1-delta-like [Priapulus caudatus]	P02256.1	RecName: Full=Histone H1, gonadal	--	--	--	--	--	--	--	--	--	--	--	B	ENOG4112541	Histone cluster 1	--	--	--
i0_HQ_sampled12fd9_c193561_f34p0_688	gi|149287176|gb|ABR23487.1|	60S ribosomal protein L11, partial [Ornithodoros parkeri]	A8WQ43.1	RecName: Full=60S ribosomal protein L11-1	isc:IscW_ISCW000476	K02868	RP-L11e, RPL11	large subunit ribosomal protein L11e	ko03010	Ribosome	KOG0397	60S ribosomal protein L11	[J]	INFORMATION STORAGE AND PROCESSING	Translation, ribosomal structure and biogenesis	J	COG0094	This is 1 of the proteins that binds and probably mediates the attachment of the 5S RNA into the large ribosomal subunit, where it forms part of the central protuberance. In the 70S ribosome it contacts protein S13 of the 30S subunit (bridge B1b), connecting the 2 subunits	Cellular Component: intracellular ribonucleoprotein complex (GO:0030529);	--	--
i0_HQ_sampled12fd9_c193562_f40p0_900	--	--	--	--	--	--	--	--	--	--	--	--	--	--	--	--	--	--	--	--	--
i0_HQ_sampled12fd9_c193568_f7p0_993	--	--	--	--	--	--	--	--	--	--	--	--	--	--	--	--	--	--	--	--	--
i0_HQ_sampled12fd9_c193577_f3p0_361	--	--	--	--	--	--	--	--	--	--	--	--	--	--	--	--	--	--	--	--	--
i0_HQ_sampled12fd9_c193583_f15p0_614	gi|449490232|ref|XP_002195512.2|	PREDICTED: tubulin alpha-8 chain [Taeniopygia guttata]	P09645.1	RecName: Full=Tubulin alpha-8 chain	tgu:100223131	K07374	TUBA	tubulin alpha	ko04540|ko04210|ko04145	Gap junction|Apoptosis|Phagosome	--	--	--	--	--	Z	COG5023	protein polymerization	--	--	--
i0_HQ_sampled12fd9_c193609_f2p0_236	--	--	--	--	--	--	--	--	--	--	--	--	--	--	--	--	--	--	--	--	--
i0_HQ_sampled12fd9_c193649_f5p0_934	gi|321474219|gb|EFX85184.1|	hypothetical protein DAPPUDRAFT_300212 [Daphnia pulex]	Q9BL19.1	RecName: Full=60S ribosomal protein L17	phu:Phum_PHUM245140	K02880	RP-L17e, RPL17	large subunit ribosomal protein L17e	ko03010	Ribosome	--	--	--	--	--	J	COG0091	The globular domain of the protein is located near the polypeptide exit tunnel on the outside of the subunit, while an extended beta-hairpin is found that lines the wall of the exit tunnel in the center of the 70S ribosome (By similarity)	Molecular Function: structural constituent of ribosome (GO:0003735);|Biological Process: translation (GO:0006412);|Cellular Component: large ribosomal subunit (GO:0015934);	--	--
i0_HQ_sampled12fd9_c193653_f2p0_420	--	--	--	--	--	--	--	--	--	--	--	--	--	--	--	--	--	--	--	--	--
i0_HQ_sampled12fd9_c193654_f2p0_234	--	--	--	--	--	--	--	--	--	--	--	--	--	--	--	--	--	--	--	--	--
i0_HQ_sampled12fd9_c193664_f2p0_240	--	--	--	--	--	--	--	--	--	--	--	--	--	--	--	--	--	--	--	--	--
i0_HQ_sampled12fd9_c193674_f2p0_240	--	--	--	--	--	--	--	--	--	--	--	--	--	--	--	--	--	--	--	--	--
i0_HQ_sampled12fd9_c193680_f8p0_795	--	--	--	--	--	--	--	--	--	--	--	--	--	--	--	--	--	--	--	--	--
i0_HQ_sampled12fd9_c193694_f3p0_301	gi|631799188|gb|AHZ21076.1|	chitinase [Eriocheir sinensis]	--	--	--	--	--	--	--	--	--	--	--	--	--	--	--	--	Biological Process: metabolic process (GO:0008152);|Molecular Function: hydrolase activity (GO:0016787);	--	--
i0_HQ_sampled12fd9_c193695_f3p0_325	--	--	--	--	--	--	--	--	--	--	--	--	--	--	--	--	--	--	--	--	--
i0_HQ_sampled12fd9_c193701_f19p0_491	gi|262401197|gb|ACY66501.1|	60S acidic ribosomal protein P2 [Scylla paramamosain]	Q9SLF7.1	RecName: Full=60S acidic ribosomal protein P2-2	bna:106352563	K02943	RP-LP2, RPLP2	large subunit ribosomal protein LP2	ko03010	Ribosome	--	--	--	--	--	J	COG2058	Ribosomal protein	Cellular Component: intracellular (GO:0005622);	--	--
i0_HQ_sampled12fd9_c193723_f6p0_961	--	--	--	--	--	--	--	--	--	--	--	--	--	--	--	--	--	--	--	--	--
i0_HQ_sampled12fd9_c193724_f19p0_533	--	--	--	--	--	--	--	--	--	--	--	--	--	--	--	--	--	--	--	--	--
i0_HQ_sampled12fd9_c193735_f14p0_450	--	--	--	--	--	--	--	--	--	--	--	--	--	--	--	--	--	--	--	--	--
i0_HQ_sampled12fd9_c193738_f19p0_835	--	--	--	--	--	--	--	--	--	--	--	--	--	--	--	--	--	--	--	--	--
i0_HQ_sampled12fd9_c193739_f25p0_587	--	--	--	--	--	--	--	--	--	--	--	--	--	--	--	--	--	--	--	--	--
i0_HQ_sampled12fd9_c193745_f20p0_996	--	--	--	--	--	--	--	--	--	--	--	--	--	--	--	--	--	--	--	--	--
i0_HQ_sampled12fd9_c193747_f23p0_923	--	--	--	--	--	--	--	--	--	--	--	--	--	--	--	--	--	--	--	--	--
i0_HQ_sampled12fd9_c193767_f3p0_778	gi|801383180|ref|XP_012054737.1|	PREDICTED: 28S ribosomal protein S28, mitochondrial [Atta cephalotes]	Q9Y2Q9.1	RecName: Full=28S ribosomal protein S28, mitochondrial; Short=MRP-S28; Short=S28mt; AltName: Full=28S ribosomal protein S35, mitochondrial; Short=MRP-S35; Short=S35mt; AltName: Full=Mitochondrial small ribosomal subunit protein bS1m; Flags: Precursor	cfo:105248419	K17407	MRPS28	small subunit ribosomal protein S28	--	--	--	--	--	--	--	S	ENOG4111RYH	Mitochondrial ribosomal protein S28	--	--	--
i0_HQ_sampled12fd9_c193781_f13p0_802	gi|642936715|ref|XP_008198550.1|	PREDICTED: 60S ribosomal protein L5 [Tribolium castaneum]	O65353.1	RecName: Full=60S ribosomal protein L5	tca:103312128	K02932	RP-L5e, RPL5	large subunit ribosomal protein L5e	ko03010	Ribosome	--	--	--	--	--	J	COG0256	This is one of the proteins that binds and probably mediates the attachment of the 5S RNA into the large ribosomal subunit, where it forms part of the central protuberance (By similarity)	Cellular Component: intracellular (GO:0005622);	--	--
i0_HQ_sampled12fd9_c193783_f16p0_997	--	--	--	--	--	--	--	--	--	--	--	--	--	--	--	--	--	--	--	--	--
i0_HQ_sampled12fd9_c193790_f3p0_509	--	--	--	--	--	--	--	--	--	--	--	--	--	--	--	--	--	--	--	--	--
i0_HQ_sampled12fd9_c193801_f3p0_285	--	--	--	--	--	--	--	--	--	--	--	--	--	--	--	--	--	--	--	--	--
i0_HQ_sampled12fd9_c193816_f21p0_726	gi|113866028|ref|NP_001038957.1|	ubiquinol-cytochrome C reductase complex 14kD subunit [Bombyx mori]	Q9D855.3	RecName: Full=Cytochrome b-c1 complex subunit 7; AltName: Full=Complex III subunit 7; AltName: Full=Complex III subunit VII; AltName: Full=Ubiquinol-cytochrome c reductase complex 14 kDa protein	bmor:751613	K00417	QCR7, UQCRB	ubiquinol-cytochrome c reductase subunit 7	ko00190|ko04260	Oxidative phosphorylation|Cardiac muscle contraction	--	--	--	--	--	C	ENOG4111V1G	component of the ubiquinol-cytochrome c reductase complex (complex III or cytochrome b-c1 complex), which is part of the mitochondrial respiratory chain (By similarity)	Cellular Component: mitochondrion (GO:0005739);|Cellular Component: membrane (GO:0016020);	--	--
i0_HQ_sampled12fd9_c193817_f27p0_927	gi|374722920|gb|AEZ68611.1|	adenine nucleotide translocase [Litopenaeus vannamei]	P12235.4	RecName: Full=ADP/ATP translocase 1; AltName: Full=ADP,ATP carrier protein 1; AltName: Full=ADP,ATP carrier protein, heart/skeletal muscle isoform T1; AltName: Full=Adenine nucleotide translocator 1; Short=ANT 1; AltName: Full=Solute carrier family 25 member 4	spu:575225	K05863	SLC25A4S, ANT	solute carrier family 25 (mitochondrial adenine nucleotide translocator), member 4/5/6/31	ko04020|ko04022	Calcium signaling pathway|cGMP-PKG signaling pathway	KOG0749	Mitochondrial ADP/ATP carrier proteins	[C]	METABOLISM	Energy production and conversion	U	ENOG410XNW0	transmembrane transport	Molecular Function: transporter activity (GO:0005215);|Cellular Component: mitochondrial inner membrane (GO:0005743);|Cellular Component: integral component of membrane (GO:0016021);|Biological Process: transmembrane transport (GO:0055085);	--	--
i0_HQ_sampled12fd9_c193826_f11p0_252	gi|1040777850|gb|JAS03978.1|	hypothetical protein [Pinctada fucata]	--	--	--	--	--	--	--	--	--	--	--	--	--	--	--	--	--	--	--
i0_HQ_sampled12fd9_c193842_f4p0_284	--	--	--	--	--	--	--	--	--	--	--	--	--	--	--	--	--	--	--	--	--
i0_HQ_sampled12fd9_c193846_f10p0_997	gi|262401467|gb|ACY66634.1|	calreticulin, partial [Scylla paramamosain]	Q4VIT5.1	RecName: Full=Calreticulin; Flags: Precursor	nvi:100116123	K08057	CALR	calreticulin	ko04612|ko04141|ko04145	Antigen processing and presentation|Protein processing in endoplasmic reticulum|Phagosome	KOG0674	Calreticulin	[O]	CELLULAR PROCESSES AND SIGNALING	Posttranslational modification, protein turnover, chaperones	O	ENOG410XRR7	Calreticulin	Molecular Function: calcium ion binding (GO:0005509);|Cellular Component: endoplasmic reticulum (GO:0005783);|Biological Process: protein folding (GO:0006457);|Molecular Function: unfolded protein binding (GO:0051082);	--	--
i0_HQ_sampled12fd9_c193847_f4p0_503	--	--	--	--	--	--	--	--	--	--	--	--	--	--	--	--	--	--	--	--	--
i0_HQ_sampled12fd9_c193879_f30p0_744	--	--	--	--	--	--	--	--	--	--	--	--	--	--	--	--	--	--	--	--	--
i0_HQ_sampled12fd9_c193908_f31p0_813	--	--	--	--	--	--	--	--	--	--	--	--	--	--	--	--	--	--	--	--	--
i0_HQ_sampled12fd9_c193942_f11p0_251	gi|170060494|ref|XP_001865828.1|	outer mitochondrial translocase subunit [Culex quinquefasciatus]	Q2KI08.1	RecName: Full=Mitochondrial import receptor subunit TOM7 homolog; AltName: Full=Translocase of outer membrane 7 kDa subunit homolog	cqu:CpipJ_CPIJ015536	K17771	TOM7	mitochondrial import receptor subunit TOM7	--	--	--	--	--	--	--	U	ENOG41123F4	Translocase of outer mitochondrial membrane 7 homolog (Yeast)	Cellular Component: mitochondrial outer membrane translocase complex (GO:0005742);|Biological Process: protein import into mitochondrial matrix (GO:0030150);	--	--
i0_HQ_sampled12fd9_c193950_f7p0_955	gi|3907620|gb|AAC78681.1|	actin 1 [Penaeus monodon]	O16808.1	RecName: Full=Actin; Flags: Precursor	rro:104675775	K05692	ACTB_G1	actin beta/gamma 1	ko04145|ko04520|ko04670|ko04015|ko04390|ko04611|ko04391|ko04510|ko04745|ko04810|ko04530|ko04919|ko04210|ko04921	Phagosome|Adherens junction|Leukocyte transendothelial migration|Rap1 signaling pathway|Hippo signaling pathway|Platelet activation|Hippo signaling pathway - fly|Focal adhesion|Phototransduction - fly|Regulation of actin cytoskeleton|Tight junction|Thyroid hormone signaling pathway|Apoptosis|Oxytocin signaling pathway	KOG0676	Actin and related proteins	[Z]	CELLULAR PROCESSES AND SIGNALING	Cytoskeleton	Z	COG5277	Actin-related protein	Molecular Function: ATP binding (GO:0005524);	--	--
i0_HQ_sampled12fd9_c193955_f9p0_605	--	--	--	--	--	--	--	--	--	--	--	--	--	--	--	--	--	--	--	--	--
i0_HQ_sampled12fd9_c193962_f27p0_608	--	--	--	--	--	--	--	--	--	--	--	--	--	--	--	--	--	--	--	--	--
i0_HQ_sampled12fd9_c194005_f4p0_930	gi|3915094|sp|Q94572.1|TBA3_HOMAM	RecName: Full=Tubulin alpha-3 chain; AltName: Full=Alpha-III tubulin	Q94572.1	RecName: Full=Tubulin alpha-3 chain; AltName: Full=Alpha-III tubulin	nle:100585215	K07374	TUBA	tubulin alpha	ko04540|ko04210|ko04145	Gap junction|Apoptosis|Phagosome	--	--	--	--	--	Z	COG5023	protein polymerization	Molecular Function: GTPase activity (GO:0003924);|Molecular Function: structural constituent of cytoskeleton (GO:0005200);|Molecular Function: GTP binding (GO:0005525);|Cellular Component: cytoplasm (GO:0005737);|Cellular Component: microtubule (GO:0005874);|Biological Process: microtubule-based process (GO:0007017);	--	--
i0_HQ_sampled12fd9_c194030_f27p0_449	gi|676483840|ref|XP_009063154.1|	hypothetical protein LOTGIDRAFT_235549 [Lottia gigantea]	A7X3Z7.1	RecName: Full=C-type lectin lectoxin-Lio2; Short=CTL; Flags: Precursor	lgi:LOTGIDRAFT_235549	K06560	MRC	mannose receptor, C type	ko04145	Phagosome	--	--	--	--	--	U	ENOG41123NI	endocytosis	--	--	--
i0_HQ_sampled12fd9_c194034_f24p0_438	--	--	--	--	--	--	--	--	--	--	--	--	--	--	--	--	--	--	--	--	--
i0_HQ_sampled12fd9_c194143_f4p0_234	--	--	--	--	--	--	--	--	--	--	--	--	--	--	--	--	--	--	--	--	--
i0_HQ_sampled12fd9_c194193_f2p0_249	--	--	--	--	--	--	--	--	--	--	--	--	--	--	--	--	--	--	--	--	--
i0_HQ_sampled12fd9_c194195_f2p0_241	--	--	--	--	--	--	--	--	--	--	--	--	--	--	--	--	--	--	--	--	--
i0_HQ_sampled12fd9_c194211_f2p0_240	--	--	--	--	--	--	--	--	--	--	--	--	--	--	--	--	--	--	--	--	--
i0_HQ_sampled12fd9_c194214_f2p0_234	--	--	--	--	--	--	--	--	--	--	--	--	--	--	--	--	--	--	--	--	--
i0_HQ_sampled12fd9_c194355_f26p0_477	gi|942411829|gb|JAN87844.1|	60S acidic ribosomal protein P1 [Daphnia magna]	P02402.2	RecName: Full=60S acidic ribosomal protein P1; AltName: Full=eL12'/ eL12'-P	isc:IscW_ISCW006538	K02942	RP-LP1, RPLP1	large subunit ribosomal protein LP1	ko03010	Ribosome	--	--	--	--	--	J	COG2058	Ribosomal protein	Molecular Function: structural constituent of ribosome (GO:0003735);|Cellular Component: ribosome (GO:0005840);|Biological Process: translational elongation (GO:0006414);|Cellular Component: integral component of membrane (GO:0016021);	--	--
i0_HQ_sampled12fd9_c194393_f69p0_632	--	--	--	--	--	--	--	--	--	--	--	--	--	--	--	--	--	--	--	--	--
i0_HQ_sampled12fd9_c194426_f18p0_972	--	--	--	--	--	--	--	--	--	--	--	--	--	--	--	--	--	--	--	--	--
i0_HQ_sampled12fd9_c194492_f19p5_709	--	--	--	--	--	--	--	--	--	--	--	--	--	--	--	--	--	--	--	--	--
i0_HQ_sampled12fd9_c194539_f24p0_766	--	--	--	--	--	--	--	--	--	--	--	--	--	--	--	--	--	--	--	--	--
i0_HQ_sampled12fd9_c194552_f16p0_710	--	--	--	--	--	--	--	--	--	--	--	--	--	--	--	--	--	--	--	--	--
i0_HQ_sampled12fd9_c194555_f35p0_861	--	--	--	--	--	--	--	--	--	--	--	--	--	--	--	--	--	--	--	--	--
i0_HQ_sampled12fd9_c194607_f10p0_731	--	--	--	--	--	--	--	--	--	--	--	--	--	--	--	--	--	--	--	--	--
i0_HQ_sampled12fd9_c194640_f38p0_897	gi|18700491|dbj|BAB85212.1|	ATP lipid-binding protein like protein, partial [Marsupenaeus japonicus]	Q9U505.1	RecName: Full=ATP synthase lipid-binding protein, mitochondrial; AltName: Full=ATPase protein 9; AltName: Full=ATPase subunit c; Flags: Precursor	bmor:101738009	K02128	ATPeF0C, ATP5G, ATP9	F-type H+-transporting ATPase subunit c	ko00190	Oxidative phosphorylation	--	--	--	--	--	C	COG0636	F(1)F(0) ATP synthase produces ATP from ADP in the presence of a proton or sodium gradient. F-type ATPases consist of two structural domains, F(1) containing the extramembraneous catalytic core and F(0) containing the membrane proton channel, linked together by a central stalk and a peripheral stalk. During catalysis, ATP synthesis in the catalytic domain of F(1) is coupled via a rotary mechanism…	Molecular Function: hydrogen ion transmembrane transporter activity (GO:0015078);|Biological Process: ATP synthesis coupled proton transport (GO:0015986);|Biological Process: ATP hydrolysis coupled proton transport (GO:0015991);|Cellular Component: integral component of membrane (GO:0016021);|Cellular Component: proton-transporting ATP synthase complex, coupling factor F(o) (GO:0045263);	--	--
i0_HQ_sampled12fd9_c194784_f8p0_639	--	--	--	--	--	--	--	--	--	--	--	--	--	--	--	--	--	--	--	--	--
i0_HQ_sampled12fd9_c194804_f6p0_542	--	--	--	--	--	--	--	--	--	--	--	--	--	--	--	--	--	--	--	--	--
i0_HQ_sampled12fd9_c194905_f6p0_474	gi|942411829|gb|JAN87844.1|	60S acidic ribosomal protein P1 [Daphnia magna]	P02402.2	RecName: Full=60S acidic ribosomal protein P1; AltName: Full=eL12'/ eL12'-P	isc:IscW_ISCW006538	K02942	RP-LP1, RPLP1	large subunit ribosomal protein LP1	ko03010	Ribosome	--	--	--	--	--	J	COG2058	Ribosomal protein	Molecular Function: structural constituent of ribosome (GO:0003735);|Cellular Component: ribosome (GO:0005840);|Biological Process: translational elongation (GO:0006414);|Cellular Component: integral component of membrane (GO:0016021);	--	--
i0_HQ_sampled12fd9_c194919_f4p0_894	gi|952952253|gb|ALO20448.1|	chitin deacetylase 1 [Penaeus monodon]	--	--	--	--	--	--	--	--	--	--	--	--	--	S	ENOG410XX7G	chitin deacetylase activity	Molecular Function: catalytic activity (GO:0003824);|Biological Process: organic substance metabolic process (GO:0071704);	--	--
i0_HQ_sampled12fd9_c194960_f5p0_579	gi|17221659|dbj|BAB78484.1|	ribosome like protein [Marsupenaeus japonicus]	P48855.1	RecName: Full=40S ribosomal protein S14	dvi:Dvir_GJ18661	K02955	RP-S14e, RPS14	small subunit ribosomal protein S14e	ko03010	Ribosome	KOG0407	40S ribosomal protein S14	[J]	INFORMATION STORAGE AND PROCESSING	Translation, ribosomal structure and biogenesis	J	COG0100	Located on the platform of the 30S subunit, it bridges several disparate RNA helices of the 16S rRNA. Forms part of the Shine-Dalgarno cleft in the 70S ribosome (By similarity)	Molecular Function: structural constituent of ribosome (GO:0003735);|Cellular Component: ribosome (GO:0005840);|Biological Process: translation (GO:0006412);	--	--
i0_HQ_sampled12fd9_c194969_f5p0_997	--	--	--	--	--	--	--	--	--	--	--	--	--	--	--	--	--	--	--	--	--
i0_HQ_sampled12fd9_c195030_f3p0_945	--	--	--	--	--	--	--	--	--	--	--	--	--	--	--	--	--	--	--	--	--
i0_HQ_sampled12fd9_c195122_f3p0_707	--	--	--	--	--	--	--	--	--	--	--	--	--	--	--	--	--	--	--	--	--
i0_HQ_sampled12fd9_c195182_f2p0_363	--	--	--	--	--	--	--	--	--	--	--	--	--	--	--	--	--	--	--	--	--
i0_HQ_sampled12fd9_c195194_f3p0_502	--	--	--	--	--	--	--	--	--	--	--	--	--	--	--	--	--	--	--	--	--
i0_HQ_sampled12fd9_c195214_f2p0_482	gi|391334873|ref|XP_003741823.1|	PREDICTED: tubulin alpha-1C chain-like [Metaseiulus occidentalis]	Q3ZCJ7.1	RecName: Full=Tubulin alpha-1C chain; Contains: RecName: Full=Detyrosinated tubulin alpha-1C chain	oas:101121396	K07374	TUBA	tubulin alpha	ko04540|ko04210|ko04145	Gap junction|Apoptosis|Phagosome	--	--	--	--	--	Z	COG5023	protein polymerization	--	--	--
i0_HQ_sampled12fd9_c195216_f2p0_417	--	--	--	--	--	--	--	--	--	--	--	--	--	--	--	--	--	--	--	--	--
i0_HQ_sampled12fd9_c195223_f2p0_367	--	--	--	--	--	--	--	--	--	--	--	--	--	--	--	--	--	--	--	--	--
i0_HQ_sampled12fd9_c195237_f2p0_735	--	--	--	--	--	--	--	--	--	--	--	--	--	--	--	--	--	--	--	--	--
i0_HQ_sampled12fd9_c195267_f2p0_836	gi|961377557|gb|ALS05376.1|	heat shock protein 10 [Penaeus monodon]	Q5DC69.2	RecName: Full=10 kDa heat shock protein, mitochondrial; Short=Hsp10; AltName: Full=10 kDa chaperonin; AltName: Full=Chaperonin 10; Short=CPN10	hro:HELRODRAFT_156380	K04078	groES, HSPE1	chaperonin GroES	--	--	--	--	--	--	--	O	COG0234	Binds to cpn60 in the presence of Mg-ATP and suppresses the ATPase activity of the latter (By similarity)	Cellular Component: cytoplasm (GO:0005737);|Biological Process: protein folding (GO:0006457);	--	--
i0_HQ_sampled12fd9_c195280_f2p0_711	--	--	--	--	--	--	--	--	--	--	--	--	--	--	--	--	--	--	--	--	--
i0_HQ_sampled12fd9_c195292_f2p0_268	--	--	--	--	--	--	--	--	--	--	--	--	--	--	--	--	--	--	--	--	--
i0_HQ_sampled12fd9_c195298_f2p0_309	--	--	--	--	--	--	--	--	--	--	--	--	--	--	--	--	--	--	--	--	--
i0_HQ_sampled12fd9_c195302_f2p2_716	--	--	--	--	--	--	--	--	--	--	--	--	--	--	--	--	--	--	--	--	--
i0_HQ_sampled12fd9_c195303_f2p0_394	--	--	--	--	--	--	--	--	--	--	--	--	--	--	--	--	--	--	--	--	--
i0_HQ_sampled12fd9_c195307_f2p0_371	--	--	--	--	--	--	--	--	--	--	--	--	--	--	--	--	--	--	--	--	--
i0_HQ_sampled12fd9_c195329_f4p0_832	--	--	--	--	--	--	--	--	--	--	--	--	--	--	--	--	--	--	--	--	--
i0_HQ_sampled12fd9_c195345_f2p1_327	--	--	--	--	--	--	--	--	--	--	--	--	--	--	--	--	--	--	--	--	--
i0_HQ_sampled12fd9_c195355_f2p0_637	--	--	--	--	--	--	--	--	--	--	--	--	--	--	--	--	--	--	--	--	--
i0_HQ_sampled12fd9_c195356_f2p0_323	--	--	--	--	--	--	--	--	--	--	--	--	--	--	--	--	--	--	--	--	--
i0_HQ_sampled12fd9_c195358_f2p0_641	--	--	--	--	--	--	--	--	--	--	--	--	--	--	--	--	--	--	--	--	--
i0_HQ_sampled12fd9_c195383_f2p0_734	gi|296042343|gb|ADG85661.1|	lectin B isoform 2, partial [Marsupenaeus japonicus]	Q6ZS10.2	RecName: Full=C-type lectin domain family 17, member A; AltName: Full=Prolectin	asn:102381472	K17513	CLEC17A	C-type lectin superfamily 17 member A	--	--	--	--	--	--	--	S	ENOG410ZUDC	Lectin C-type domain	--	--	--
i0_HQ_sampled12fd9_c195398_f2p0_794	--	--	--	--	--	--	--	--	--	--	--	--	--	--	--	--	--	--	--	--	--
i0_HQ_sampled12fd9_c195399_f2p0_386	--	--	--	--	--	--	--	--	--	--	--	--	--	--	--	--	--	--	--	--	--
i0_HQ_sampled12fd9_c195403_f2p0_948	--	--	--	--	--	--	--	--	--	--	--	--	--	--	--	--	--	--	--	--	--
i0_HQ_sampled12fd9_c195418_f4p0_414	--	--	--	--	--	--	--	--	--	--	--	--	--	--	--	--	--	--	--	--	--
i0_HQ_sampled12fd9_c195422_f2p0_830	gi|675875102|ref|XP_009023111.1|	hypothetical protein HELRODRAFT_162756 [Helobdella robusta]	--	--	--	--	--	--	--	--	--	--	--	--	--	S	ENOG4111WD1	NA	--	--	--
i0_HQ_sampled12fd9_c195426_f2p0_350	gi|751868543|ref|YP_009118046.1|	NADH dehydrogenase subunit 5 (mitochondrion) [Brachyuropus grewingkii]	P33510.1	RecName: Full=NADH-ubiquinone oxidoreductase chain 5; AltName: Full=NADH dehydrogenase subunit 5	dya:ND5	K03883	ND5	NADH-ubiquinone oxidoreductase chain 5	ko00190	Oxidative phosphorylation	--	--	--	--	--	--	--	--	Cellular Component: membrane (GO:0016020);	--	--
i0_HQ_sampled12fd9_c195430_f2p0_300	--	--	--	--	--	--	--	--	--	--	--	--	--	--	--	--	--	--	--	--	--
i0_HQ_sampled12fd9_c195444_f2p0_700	--	--	--	--	--	--	--	--	--	--	--	--	--	--	--	--	--	--	--	--	--
i0_HQ_sampled12fd9_c195457_f2p0_783	gi|1022772748|gb|KZS16905.1|	Uncharacterized protein APZ42_017534 [Daphnia magna]	Q9V7U0.1	RecName: Full=Pro-resilin; Flags: Precursor	--	--	--	--	--	--	--	--	--	--	--	--	--	--	--	--	--
i0_HQ_sampled12fd9_c195459_f2p0_969	--	--	--	--	--	--	--	--	--	--	--	--	--	--	--	--	--	--	--	--	--
i0_HQ_sampled12fd9_c195463_f2p0_285	--	--	--	--	--	--	--	--	--	--	--	--	--	--	--	--	--	--	--	--	--
i0_HQ_sampled12fd9_c1963_f2p3_679	--	--	--	--	--	--	--	--	--	--	--	--	--	--	--	--	--	--	--	--	--
i0_HQ_sampled12fd9_c1995_f2p0_294	--	--	--	--	--	--	--	--	--	--	--	--	--	--	--	--	--	--	--	--	--
i0_HQ_sampled12fd9_c2006_f3p0_472	--	--	--	--	--	--	--	--	--	--	--	--	--	--	--	--	--	--	--	--	--
i0_HQ_sampled12fd9_c201352_f2p0_890	gi|385258072|gb|AFI54986.1|	ferritin [Macrobrachium rosenbergii]	Q26061.1	RecName: Full=Ferritin	obi:106875910	K00522	FTH1	ferritin heavy chain	ko04978	Mineral absorption	--	--	--	--	--	P	COG1528	Stores iron in a soluble, non-toxic, readily available form. Important for iron homeostasis (By similarity)	Molecular Function: ferroxidase activity (GO:0004322);|Cellular Component: cell (GO:0005623);|Biological Process: iron ion transport (GO:0006826);|Biological Process: cellular iron ion homeostasis (GO:0006879);|Molecular Function: ferric iron binding (GO:0008199);|Biological Process: oxidation-reduction process (GO:0055114);	--	--
i0_HQ_sampled12fd9_c204074_f2p0_516	--	--	--	--	--	--	--	--	--	--	--	--	--	--	--	--	--	--	--	--	--
i0_HQ_sampled12fd9_c2041_f2p0_736	--	--	--	--	--	--	--	--	--	--	--	--	--	--	--	--	--	--	--	--	--
i0_HQ_sampled12fd9_c2043_f6p0_766	--	--	--	--	--	--	--	--	--	--	--	--	--	--	--	--	--	--	--	--	--
i0_HQ_sampled12fd9_c205023_f2p0_443	--	--	--	--	--	--	--	--	--	--	--	--	--	--	--	--	--	--	--	--	--
i0_HQ_sampled12fd9_c207424_f2p0_518	--	--	--	--	--	--	--	--	--	--	--	--	--	--	--	--	--	--	--	--	--
i0_HQ_sampled12fd9_c2076_f2p0_770	--	--	--	--	--	--	--	--	--	--	--	--	--	--	--	--	--	--	--	--	--
i0_HQ_sampled12fd9_c207986_f2p0_631	--	--	--	--	--	--	--	--	--	--	--	--	--	--	--	--	--	--	--	--	--
i0_HQ_sampled12fd9_c20_f34p0_919	--	--	--	--	--	--	--	--	--	--	--	--	--	--	--	--	--	--	--	--	--
i0_HQ_sampled12fd9_c210524_f2p0_598	--	--	--	--	--	--	--	--	--	--	--	--	--	--	--	--	--	--	--	--	--
i0_HQ_sampled12fd9_c211433_f2p0_641	--	--	--	--	--	--	--	--	--	--	--	--	--	--	--	--	--	--	--	--	--
i0_HQ_sampled12fd9_c2132_f3p1_749	--	--	--	--	--	--	--	--	--	--	--	--	--	--	--	--	--	--	--	--	--
i0_HQ_sampled12fd9_c213786_f2p0_644	--	--	--	--	--	--	--	--	--	--	--	--	--	--	--	--	--	--	--	--	--
i0_HQ_sampled12fd9_c213860_f2p0_541	--	--	--	--	--	--	--	--	--	--	--	--	--	--	--	--	--	--	--	--	--
i0_HQ_sampled12fd9_c2168_f2p0_532	--	--	--	--	--	--	--	--	--	--	--	--	--	--	--	--	--	--	--	--	--
i0_HQ_sampled12fd9_c2185_f5p0_943	gi|357612167|gb|EHJ67850.1|	hypothetical protein KGM_06138 [Danaus plexippus]	P51970.3	RecName: Full=NADH dehydrogenase [ubiquinone] 1 alpha subcomplex subunit 8; AltName: Full=Complex I-19kD; Short=CI-19kD; AltName: Full=Complex I-PGIV; Short=CI-PGIV; AltName: Full=NADH-ubiquinone oxidoreductase 19 kDa subunit	pxy:105394840	K03952	NDUFA8	NADH dehydrogenase (ubiquinone) 1 alpha subcomplex subunit 8	ko00190	Oxidative phosphorylation	--	--	--	--	--	I	ENOG4111IST	NADH dehydrogenase (Ubiquinone) 1 alpha subcomplex	Cellular Component: membrane (GO:0016020);	--	--
i0_HQ_sampled12fd9_c21_f62p0_748	--	--	--	--	--	--	--	--	--	--	--	--	--	--	--	--	--	--	--	--	--
i0_HQ_sampled12fd9_c221670_f2p0_618	gi|1350937|sp|P48855.1|RS14_PROCL	RecName: Full=40S ribosomal protein S14	P48855.1	RecName: Full=40S ribosomal protein S14	thj:104816593	K02955	RP-S14e, RPS14	small subunit ribosomal protein S14e	ko03010	Ribosome	KOG0407	40S ribosomal protein S14	[J]	INFORMATION STORAGE AND PROCESSING	Translation, ribosomal structure and biogenesis	J	COG0100	Located on the platform of the 30S subunit, it bridges several disparate RNA helices of the 16S rRNA. Forms part of the Shine-Dalgarno cleft in the 70S ribosome (By similarity)	Molecular Function: structural constituent of ribosome (GO:0003735);|Cellular Component: ribosome (GO:0005840);|Biological Process: translation (GO:0006412);	--	--
i0_HQ_sampled12fd9_c223412_f2p0_586	gi|700894659|gb|AIU99748.1|	mitochondrial cytochrome c oxidase subunit VIa precursor [Litopenaeus vannamei]	O13085.1	RecName: Full=Cytochrome c oxidase subunit 6A, mitochondrial; AltName: Full=Cytochrome c oxidase polypeptide VIa; Flags: Precursor	xla:734682	K02266	COX6A	cytochrome c oxidase subunit 6a	ko00190|ko04260	Oxidative phosphorylation|Cardiac muscle contraction	--	--	--	--	--	O	ENOG411253X	Cytochrome c oxidase polypeptide VIa	--	--	--
i0_HQ_sampled12fd9_c223605_f2p0_562	--	--	--	--	--	--	--	--	--	--	--	--	--	--	--	--	--	--	--	--	--
i0_HQ_sampled12fd9_c223656_f2p0_314	gi|675890694|ref|XP_009030849.1|	hypothetical protein HELRODRAFT_182328 [Helobdella robusta]	--	--	--	--	--	--	--	--	--	--	--	--	--	S	ENOG4111WD1	NA	--	--	--
i0_HQ_sampled12fd9_c224256_f2p0_414	--	--	--	--	--	--	--	--	--	--	--	--	--	--	--	--	--	--	--	--	--
i0_HQ_sampled12fd9_c2253_f4p0_275	--	--	--	--	--	--	--	--	--	--	--	--	--	--	--	--	--	--	--	--	--
i0_HQ_sampled12fd9_c2260_f2p0_529	--	--	--	--	--	--	--	--	--	--	--	--	--	--	--	--	--	--	--	--	--
i0_HQ_sampled12fd9_c227001_f2p0_645	--	--	--	--	--	--	--	--	--	--	--	--	--	--	--	--	--	--	--	--	--
i0_HQ_sampled12fd9_c228773_f2p0_348	--	--	--	--	--	--	--	--	--	--	--	--	--	--	--	--	--	--	--	--	--
i0_HQ_sampled12fd9_c228844_f5p0_903	gi|939679280|ref|XP_014285084.1|	PREDICTED: uncharacterized protein LOC106686355 isoform X2 [Halyomorpha halys]	--	--	--	--	--	--	--	--	--	--	--	--	--	S	ENOG4111JGD	NA	--	--	--
i0_HQ_sampled12fd9_c22963_f3p0_348	--	--	--	--	--	--	--	--	--	--	--	--	--	--	--	--	--	--	--	--	--
i0_HQ_sampled12fd9_c22_f39p0_962	gi|998497614|ref|XP_015524587.1|	PREDICTED: cytochrome c oxidase subunit 5B, mitochondrial-like [Neodiprion lecontei]	P12075.2	RecName: Full=Cytochrome c oxidase subunit 5B, mitochondrial; AltName: Full=Cytochrome c oxidase polypeptide Vb; AltName: Full=Cytochrome c oxidase subunit VIA*; Flags: Precursor	tca:656612	K02265	COX5B	cytochrome c oxidase subunit 5b	ko00190|ko04260	Oxidative phosphorylation|Cardiac muscle contraction	--	--	--	--	--	O	ENOG4111XEM	cytochrome C oxidase	--	--	--
i0_HQ_sampled12fd9_c231809_f2p10_303	--	--	--	--	--	--	--	--	--	--	--	--	--	--	--	--	--	--	--	--	--
i0_HQ_sampled12fd9_c231810_f2p0_650	--	--	--	--	--	--	--	--	--	--	--	--	--	--	--	--	--	--	--	--	--
i0_HQ_sampled12fd9_c23196_f3p0_482	gi|16930529|gb|AAL31950.1|	CDH1-D, partial [Gallus gallus]	--	--	--	--	--	--	--	--	--	--	--	--	--	--	--	--	--	--	--
i0_HQ_sampled12fd9_c23204_f2p0_268	--	--	--	--	--	--	--	--	--	--	--	--	--	--	--	--	--	--	--	--	--
i0_HQ_sampled12fd9_c2320_f3p0_436	--	--	--	--	--	--	--	--	--	--	--	--	--	--	--	--	--	--	--	--	--
i0_HQ_sampled12fd9_c232252_f2p0_516	--	--	--	--	--	--	--	--	--	--	--	--	--	--	--	--	--	--	--	--	--
i0_HQ_sampled12fd9_c23227_f2p0_264	--	--	--	--	--	--	--	--	--	--	--	--	--	--	--	--	--	--	--	PF01391.17	Collagen triple helix repeat (20 copies)
i0_HQ_sampled12fd9_c232742_f5p0_706	--	--	--	--	--	--	--	--	--	--	--	--	--	--	--	--	--	--	--	--	--
i0_HQ_sampled12fd9_c23287_f2p0_264	--	--	--	--	--	--	--	--	--	--	--	--	--	--	--	--	--	--	--	--	--
i0_HQ_sampled12fd9_c233443_f4p0_992	--	--	--	--	--	--	--	--	--	--	--	--	--	--	--	--	--	--	--	--	--
i0_HQ_sampled12fd9_c233553_f3p0_592	gi|291226384|ref|XP_002733172.1|	PREDICTED: inorganic pyrophosphatase-like [Saccoglossus kowalevskii]	Q6FRB7.1	RecName: Full=Inorganic pyrophosphatase; AltName: Full=Pyrophosphate phospho-hydrolase; Short=PPase	--	--	--	--	--	--	--	--	--	--	--	C	COG0221	Pyrophosphate phospho-hydrolase	--	--	--
i0_HQ_sampled12fd9_c23419_f35p0_897	gi|391329623|ref|XP_003739269.1|	PREDICTED: uncharacterized protein LOC100901383 [Metaseiulus occidentalis]	--	--	--	--	--	--	--	--	--	--	--	--	--	S	ENOG4111P12	Chitin binding Peritrophin-A domain	--	--	--
i0_HQ_sampled12fd9_c23428_f37p0_637	gi|768425524|ref|XP_011553766.1|	PREDICTED: uncharacterized protein LOC105385141 [Plutella xylostella]	--	--	--	--	--	--	--	--	--	--	--	--	--	--	--	--	--	--	--
i0_HQ_sampled12fd9_c23447_f12p0_542	--	--	--	--	--	--	--	--	--	--	--	--	--	--	--	--	--	--	--	--	--
i0_HQ_sampled12fd9_c23453_f15p2_556	gi|262401367|gb|ACY66586.1|	putative ribosomal protein S23e [Scylla paramamosain]	Q86FP7.1	RecName: Full=40S ribosomal protein S23	api:100159449	K02973	RP-S23e, RPS23	small subunit ribosomal protein S23e	ko03010	Ribosome	--	--	--	--	--	J	COG0048	Interacts with and stabilizes bases of the 16S rRNA that are involved in tRNA selection in the A site and with the mRNA backbone. Located at the interface of the 30S and 50S subunits, it traverses the body of the 30S subunit contacting proteins on the other side and probably holding the rRNA structure together. The combined cluster of proteins S8, S12 and S17 appears to hold together the shoulder…	Molecular Function: structural constituent of ribosome (GO:0003735);|Biological Process: translation (GO:0006412);|Cellular Component: small ribosomal subunit (GO:0015935);	--	--
i0_HQ_sampled12fd9_c23461_f13p2_559	--	--	--	--	--	--	--	--	--	--	--	--	--	--	--	--	--	--	--	--	--
i0_HQ_sampled12fd9_c2346_f2p18_846	--	--	--	--	--	--	--	--	--	--	--	--	--	--	--	--	--	--	--	--	--
i0_HQ_sampled12fd9_c23482_f11p2_719	gi|328899820|gb|AEB54650.1|	ribosomal protein S7 [Procambarus clarkii]	P62083.1	RecName: Full=40S ribosomal protein S7; AltName: Full=S8	crg:105319797	K02993	RP-S7e, RPS7	small subunit ribosomal protein S7e	ko03010	Ribosome	--	--	--	--	--	J	ENOG410ZYKB	ribosomal protein S7	Molecular Function: structural constituent of ribosome (GO:0003735);|Cellular Component: ribosome (GO:0005840);|Biological Process: translation (GO:0006412);	--	--
i0_HQ_sampled12fd9_c23483_f12p0_523	--	--	--	--	--	--	--	--	--	--	--	--	--	--	--	--	--	--	--	--	--
i0_HQ_sampled12fd9_c23485_f9p0_994	--	--	--	--	--	--	--	--	--	--	--	--	--	--	--	--	--	--	--	--	--
i0_HQ_sampled12fd9_c23486_f22p0_912	gi|854959447|gb|AKN79731.1|	ribosomal protein S2, partial [Procambarus clarkii]	P15880.2	RecName: Full=40S ribosomal protein S2; AltName: Full=40S ribosomal protein S4; AltName: Full=Protein LLRep3; AltName: Full=Small ribosomal subunit protein uS5	crg:105332191	K02981	RP-S2e, RPS2	small subunit ribosomal protein S2e	ko03010	Ribosome	--	--	--	--	--	J	COG0098	Located at the back of the 30S subunit body where it stabilizes the conformation of the head with respect to the body (By similarity)	--	--	--
i0_HQ_sampled12fd9_c235534_f2p0_578	gi|817085958|ref|XP_012265686.1|	PREDICTED: proteasome subunit beta type-6 [Athalia rosae]	Q3MHN0.1	RecName: Full=Proteasome subunit beta type-6; Flags: Precursor	spu:575236	K02738	PSMB6	20S proteasome subunit beta 1	ko03050	Proteasome	KOG0174	20S proteasome, regulatory subunit beta type PSMB6/PSMB9/PRE3	[O]	CELLULAR PROCESSES AND SIGNALING	Posttranslational modification, protein turnover, chaperones	O	ENOG410XS23	The proteasome is a multicatalytic proteinase complex which is characterized by its ability to cleave peptides with Arg, Phe, Tyr, Leu, and Glu adjacent to the leaving group at neutral or slightly basic pH. The proteasome has an ATP-dependent proteolytic activity (By similarity)	--	--	--
i0_HQ_sampled12fd9_c235726_f2p21_313	--	--	--	--	--	--	--	--	--	--	--	--	--	--	--	--	--	--	--	--	--
i0_HQ_sampled12fd9_c23605_f10p0_501	--	--	--	--	--	--	--	--	--	--	--	--	--	--	--	--	--	--	--	--	--
i0_HQ_sampled12fd9_c23617_f3p12_982	--	--	--	--	--	--	--	--	--	--	--	--	--	--	--	--	--	--	--	--	--
i0_HQ_sampled12fd9_c23632_f2p0_683	--	--	--	--	--	--	--	--	--	--	--	--	--	--	--	--	--	--	--	--	--
i0_HQ_sampled12fd9_c23676_f5p0_867	--	--	--	--	--	--	--	--	--	--	--	--	--	--	--	--	--	--	--	--	--
i0_HQ_sampled12fd9_c23723_f15p8_598	--	--	--	--	--	--	--	--	--	--	--	--	--	--	--	--	--	--	--	--	--
i0_HQ_sampled12fd9_c23745_f5p0_954	--	--	--	--	--	--	--	--	--	--	--	--	--	--	--	--	--	--	--	--	--
i0_HQ_sampled12fd9_c23782_f10p0_881	--	--	--	--	--	--	--	--	--	--	--	--	--	--	--	--	--	--	--	--	--
i0_HQ_sampled12fd9_c2381_f2p0_385	--	--	--	--	--	--	--	--	--	--	--	--	--	--	--	--	--	--	--	--	--
i0_HQ_sampled12fd9_c23820_f2p1_241	--	--	--	--	--	--	--	--	--	--	--	--	--	--	--	--	--	--	--	--	--
i0_HQ_sampled12fd9_c23854_f7p0_427	--	--	--	--	--	--	--	--	--	--	--	--	--	--	--	--	--	--	--	--	--
i0_HQ_sampled12fd9_c23888_f2p2_262	--	--	--	--	--	--	--	--	--	--	--	--	--	--	--	--	--	--	--	--	--
i0_HQ_sampled12fd9_c23895_f3p2_320	--	--	--	--	--	--	--	--	--	--	--	--	--	--	--	--	--	--	--	--	--
i0_HQ_sampled12fd9_c23914_f4p0_361	--	--	--	--	--	--	--	--	--	--	--	--	--	--	--	--	--	--	--	--	--
i0_HQ_sampled12fd9_c23918_f3p0_422	--	--	--	--	--	--	--	--	--	--	--	--	--	--	--	--	--	--	--	--	--
i0_HQ_sampled12fd9_c23924_f2p0_246	--	--	--	--	--	--	--	--	--	--	--	--	--	--	--	--	--	--	--	--	--
i0_HQ_sampled12fd9_c23936_f3p52_270	gi|913317271|ref|XP_013189614.1|	PREDICTED: chromobox protein homolog 1-like [Amyelois transitella]	P05205.2	RecName: Full=Heterochromatin protein 1; Short=HP1; AltName: Full=Non-histone chromosomal protein C1A9 antigen	tca:661786	K11585	CBX1, HP1B, SWI6	chromobox protein 1	--	--	--	--	--	--	--	S	ENOG4111JKD	chromobox homolog	--	--	--
i0_HQ_sampled12fd9_c23937_f2p0_235	--	--	--	--	--	--	--	--	--	--	--	--	--	--	--	--	--	--	--	--	--
i0_HQ_sampled12fd9_c23939_f2p0_242	--	--	--	--	--	--	--	--	--	--	--	--	--	--	--	--	--	--	--	--	--
i0_HQ_sampled12fd9_c23972_f30p0_246	--	--	--	--	--	--	--	--	--	--	--	--	--	--	--	--	--	--	--	--	--
i0_HQ_sampled12fd9_c23973_f10p13_784	--	--	--	--	--	--	--	--	--	--	--	--	--	--	--	--	--	--	--	--	--
i0_HQ_sampled12fd9_c23987_f24p0_813	--	--	--	--	--	--	--	--	--	--	--	--	--	--	--	--	--	--	--	--	--
i0_HQ_sampled12fd9_c23999_f13p9_642	--	--	--	--	--	--	--	--	--	--	--	--	--	--	--	--	--	--	--	--	--
i0_HQ_sampled12fd9_c24014_f11p0_580	--	--	--	--	--	--	--	--	--	--	--	--	--	--	--	--	--	--	--	--	--
i0_HQ_sampled12fd9_c24050_f12p1_306	--	--	--	--	--	--	--	--	--	--	--	--	--	--	--	--	--	--	--	--	--
i0_HQ_sampled12fd9_c24066_f14p0_764	gi|385100004|ref|YP_006234447.1|	COX3 gene product (mitochondrion) [Gammarus duebeni]	B0FWD1.1	RecName: Full=Cytochrome c oxidase subunit 3; AltName: Full=Cytochrome c oxidase polypeptide III	dre:140541	K02262	COX3	cytochrome c oxidase subunit 3	ko00190|ko04260	Oxidative phosphorylation|Cardiac muscle contraction	--	--	--	--	--	C	COG1845	Cytochrome C Oxidase, Subunit III	Molecular Function: cytochrome-c oxidase activity (GO:0004129);|Cellular Component: mitochondrion (GO:0005739);|Cellular Component: integral component of membrane (GO:0016021);|Biological Process: aerobic electron transport chain (GO:0019646);|Biological Process: hydrogen ion transmembrane transport (GO:1902600);	--	--
i0_HQ_sampled12fd9_c24080_f27p0_904	--	--	--	--	--	--	--	--	--	--	--	--	--	--	--	--	--	--	--	--	--
i0_HQ_sampled12fd9_c2416_f4p0_377	--	--	--	--	--	--	--	--	--	--	--	--	--	--	--	--	--	--	--	--	--
i0_HQ_sampled12fd9_c242103_f5p0_249	--	--	--	--	--	--	--	--	--	--	--	--	--	--	--	--	--	--	--	--	--
i0_HQ_sampled12fd9_c242134_f2p0_349	--	--	--	--	--	--	--	--	--	--	--	--	--	--	--	--	--	--	--	--	--
i0_HQ_sampled12fd9_c242189_f6p0_702	gi|111572543|gb|ABH10628.1|	laminin receptor [Litopenaeus vannamei]	P38981.1	RecName: Full=40S ribosomal protein SA; AltName: Full=Laminin-binding protein p40; Short=LBP/p40	hro:HELRODRAFT_185784	K02998	RP-SAe, RPSA	small subunit ribosomal protein SAe	ko03010	Ribosome	KOG0830	40S ribosomal protein SA (P40)/Laminin receptor 1	[J]	INFORMATION STORAGE AND PROCESSING	Translation, ribosomal structure and biogenesis	J	COG0052	30S ribosomal protein S2	Biological Process: ribosomal small subunit assembly (GO:0000028);|Molecular Function: structural constituent of ribosome (GO:0003735);|Biological Process: translation (GO:0006412);|Cellular Component: cytosolic small ribosomal subunit (GO:0022627);	--	--
i0_HQ_sampled12fd9_c242199_f6p0_356	gi|241999334|ref|XP_002434310.1|	alpha tubulin, putative [Ixodes scapularis]	P09645.1	RecName: Full=Tubulin alpha-8 chain	isc:IscW_ISCW004211	K07374	TUBA	tubulin alpha	ko04540|ko04210|ko04145	Gap junction|Apoptosis|Phagosome	--	--	--	--	--	Z	COG5023	protein polymerization	Molecular Function: GTPase activity (GO:0003924);|Molecular Function: structural constituent of cytoskeleton (GO:0005200);|Molecular Function: GTP binding (GO:0005525);|Cellular Component: cytoplasm (GO:0005737);|Cellular Component: microtubule (GO:0005874);|Biological Process: microtubule-based process (GO:0007017);	--	--
i0_HQ_sampled12fd9_c242291_f5p0_243	--	--	--	--	--	--	--	--	--	--	--	--	--	--	--	--	--	--	--	--	--
i0_HQ_sampled12fd9_c242346_f5p0_244	--	--	--	--	--	--	--	--	--	--	--	--	--	--	--	--	--	--	--	--	--
i0_HQ_sampled12fd9_c242405_f4p0_340	--	--	--	--	--	--	--	--	--	--	--	--	--	--	--	--	--	--	--	--	--
i0_HQ_sampled12fd9_c242567_f3p0_243	--	--	--	--	--	--	--	--	--	--	--	--	--	--	--	--	--	--	--	--	--
i0_HQ_sampled12fd9_c242594_f3p0_249	gi|961866973|ref|XP_014894107.1|	PREDICTED: COX assembly mitochondrial protein 2 homolog isoform X2 [Poecilia latipinna]	B5FXK1.1	RecName: Full=COX assembly mitochondrial protein 2 homolog	xma:102222275	K18172	CMC2	COX assembly mitochondrial protein 2	--	--	--	--	--	--	--	O	ENOG41123JB	COX assembly mitochondrial protein 2 homolog (S. cerevisiae)	--	--	--
i0_HQ_sampled12fd9_c242646_f3p0_294	--	--	--	--	--	--	--	--	--	--	--	--	--	--	--	--	--	--	--	--	--
i0_HQ_sampled12fd9_c242696_f3p0_248	--	--	--	--	--	--	--	--	--	--	--	--	--	--	--	--	--	--	--	--	--
i0_HQ_sampled12fd9_c242775_f2p0_322	--	--	--	--	--	--	--	--	--	--	--	--	--	--	--	--	--	--	--	--	--
i0_HQ_sampled12fd9_c242776_f8p0_314	--	--	--	--	--	--	--	--	--	--	--	--	--	--	--	--	--	--	--	--	--
i0_HQ_sampled12fd9_c242792_f2p0_265	--	--	--	--	--	--	--	--	--	--	--	--	--	--	--	--	--	--	--	--	--
i0_HQ_sampled12fd9_c242794_f3p0_368	--	--	--	--	--	--	--	--	--	--	--	--	--	--	--	--	--	--	--	--	--
i0_HQ_sampled12fd9_c242800_f2p0_372	--	--	--	--	--	--	--	--	--	--	--	--	--	--	--	--	--	--	--	--	--
i0_HQ_sampled12fd9_c242801_f2p0_248	--	--	--	--	--	--	--	--	--	--	--	--	--	--	--	--	--	--	--	--	--
i0_HQ_sampled12fd9_c242825_f2p0_242	--	--	--	--	--	--	--	--	--	--	--	--	--	--	--	--	--	--	--	--	--
i0_HQ_sampled12fd9_c242831_f2p0_378	--	--	--	--	--	--	--	--	--	--	--	--	--	--	--	--	--	--	--	--	--
i0_HQ_sampled12fd9_c242840_f2p0_418	--	--	--	--	--	--	--	--	--	--	--	--	--	--	--	--	--	--	--	--	--
i0_HQ_sampled12fd9_c242849_f2p0_235	--	--	--	--	--	--	--	--	--	--	--	--	--	--	--	--	--	--	--	--	--
i0_HQ_sampled12fd9_c242851_f2p0_474	--	--	--	--	--	--	--	--	--	--	--	--	--	--	--	--	--	--	--	--	--
i0_HQ_sampled12fd9_c242870_f5p0_270	--	--	--	--	--	--	--	--	--	--	--	--	--	--	--	--	--	--	--	--	--
i0_HQ_sampled12fd9_c242888_f2p0_238	--	--	--	--	--	--	--	--	--	--	--	--	--	--	--	--	--	--	--	--	--
i0_HQ_sampled12fd9_c242900_f2p0_385	--	--	--	--	--	--	--	--	--	--	--	--	--	--	--	--	--	--	--	--	--
i0_HQ_sampled12fd9_c242911_f2p0_195	--	--	--	--	--	--	--	--	--	--	--	--	--	--	--	--	--	--	--	--	--
i0_HQ_sampled12fd9_c242921_f6p0_719	--	--	--	--	--	--	--	--	--	--	--	--	--	--	--	--	--	--	--	--	--
i0_HQ_sampled12fd9_c242959_f2p0_235	--	--	--	--	--	--	--	--	--	--	--	--	--	--	--	--	--	--	--	--	--
i0_HQ_sampled12fd9_c242967_f2p0_225	--	--	--	--	--	--	--	--	--	--	--	--	--	--	--	--	--	--	--	--	--
i0_HQ_sampled12fd9_c24475_f6p0_916	gi|380853794|gb|AFE88208.1|	proteasome alpha 3 [Penaeus monodon]	P25788.2	RecName: Full=Proteasome subunit alpha type-3; AltName: Full=Macropain subunit C8; AltName: Full=Multicatalytic endopeptidase complex subunit C8; AltName: Full=Proteasome component C8	tca:658496	K02727	PSMA3	20S proteasome subunit alpha 7	ko03050	Proteasome	KOG0184	20S proteasome, regulatory subunit alpha type PSMA3/PRE10	[O]	CELLULAR PROCESSES AND SIGNALING	Posttranslational modification, protein turnover, chaperones	O	ENOG410XP01	The proteasome is a multicatalytic proteinase complex which is characterized by its ability to cleave peptides with Arg, Phe, Tyr, Leu, and Glu adjacent to the leaving group at neutral or slightly basic pH. The proteasome has an ATP-dependent proteolytic activity (By similarity)	Molecular Function: threonine-type endopeptidase activity (GO:0004298);|Cellular Component: nucleus (GO:0005634);|Cellular Component: cytoplasm (GO:0005737);|Biological Process: ubiquitin-dependent protein catabolic process (GO:0006511);|Cellular Component: proteasome core complex, alpha-subunit complex (GO:0019773);	--	--
i0_HQ_sampled12fd9_c24483_f4p0_925	--	--	--	--	--	--	--	--	--	--	--	--	--	--	--	--	--	--	--	--	--
i0_HQ_sampled12fd9_c24513_f9p0_649	--	--	--	--	--	--	--	--	--	--	--	--	--	--	--	--	--	--	--	--	--
i0_HQ_sampled12fd9_c24523_f3p0_325	--	--	--	--	--	--	--	--	--	--	--	--	--	--	--	--	--	--	--	--	--
i0_HQ_sampled12fd9_c24535_f3p0_628	--	--	--	--	--	--	--	--	--	--	--	--	--	--	--	--	--	--	--	--	--
i0_HQ_sampled12fd9_c24539_f5p1_460	--	--	--	--	--	--	--	--	--	--	--	--	--	--	--	--	--	--	--	--	--
i0_HQ_sampled12fd9_c24583_f7p0_590	gi|831550428|ref|XP_012727988.1|	PREDICTED: ribonuclease UK114 [Fundulus heteroclitus]	P80601.3	RecName: Full=2-iminobutanoate/2-iminopropanoate deaminase; AltName: Full=14.3 kDa perchloric acid soluble protein; AltName: Full=Translation inhibitor L-PSP ribonuclease; AltName: Full=UK114 antigen	--	--	--	--	--	--	--	--	--	--	--	J	COG0251	Endoribonuclease LPSP	--	--	--
i0_HQ_sampled12fd9_c24584_f5p0_627	--	--	--	--	--	--	--	--	--	--	--	--	--	--	--	--	--	--	--	--	--
i0_HQ_sampled12fd9_c24586_f8p23_643	gi|512900875|ref|XP_004924998.1|	PREDICTED: uncharacterized protein LOC101740538 [Bombyx mori]	--	--	--	--	--	--	--	--	--	--	--	--	--	S	ENOG4111Y42	Cuticular protein	--	--	--
i0_HQ_sampled12fd9_c24598_f10p0_660	--	--	--	--	--	--	--	--	--	--	--	--	--	--	--	--	--	--	--	--	--
i0_HQ_sampled12fd9_c24619_f6p4_957	gi|1009570380|ref|XP_015917345.1|	PREDICTED: probable signal peptidase complex subunit 2 [Parasteatoda tepidariorum]	Q5M8Y1.1	RecName: Full=Probable signal peptidase complex subunit 2; AltName: Full=Microsomal signal peptidase 25 kDa subunit; Short=SPase 25 kDa subunit	gga:419056	K12947	SPCS2, SPC2	signal peptidase complex subunit 2	ko03060	Protein export	--	--	--	--	--	U	ENOG4111HIK	signal peptidase complex subunit 2	--	--	--
i0_HQ_sampled12fd9_c24650_f3p0_260	--	--	--	--	--	--	--	--	--	--	--	--	--	--	--	--	--	--	--	--	--
i0_HQ_sampled12fd9_c24674_f6p0_752	--	--	--	--	--	--	--	--	--	--	--	--	--	--	--	--	--	--	--	--	--
i0_HQ_sampled12fd9_c24688_f3p0_396	--	--	--	--	--	--	--	--	--	--	--	--	--	--	--	--	--	--	--	--	--
i0_HQ_sampled12fd9_c24712_f7p0_685	--	--	--	--	--	--	--	--	--	--	--	--	--	--	--	S	COG2085	NADP oxidoreductase, coenzyme f420-dependent	--	--	--
i0_HQ_sampled12fd9_c24713_f4p0_779	--	--	--	--	--	--	--	--	--	--	--	--	--	--	--	--	--	--	--	--	--
i0_HQ_sampled12fd9_c24717_f4p0_727	--	--	--	--	--	--	--	--	--	--	--	--	--	--	--	--	--	--	--	--	--
i0_HQ_sampled12fd9_c24722_f2p1_282	--	--	--	--	--	--	--	--	--	--	--	--	--	--	--	--	--	--	--	--	--
i0_HQ_sampled12fd9_c24728_f3p5_335	gi|110825822|gb|ABH00987.1|	rhodopsin, partial [Litopenaeus vannamei]	P35356.1	RecName: Full=Rhodopsin	aag:AaeL_AAEL005625	K04255	OPN4, Rh2_7	r-opsin	--	--	--	--	--	--	--	U	ENOG410XRW9	Receptor	Molecular Function: G-protein coupled receptor activity (GO:0004930);|Biological Process: G-protein coupled receptor signaling pathway (GO:0007186);|Biological Process: visual perception (GO:0007601);|Biological Process: phototransduction (GO:0007602);|Molecular Function: photoreceptor activity (GO:0009881);|Cellular Component: integral component of membrane (GO:0016021);|Biological Process: prot…	--	--
i0_HQ_sampled12fd9_c24735_f6p6_755	--	--	--	--	--	--	--	--	--	--	--	--	--	--	--	--	--	--	--	--	--
i0_HQ_sampled12fd9_c24743_f5p0_548	--	--	--	--	--	--	--	--	--	--	--	--	--	--	--	--	--	--	--	--	--
i0_HQ_sampled12fd9_c24745_f3p0_558	--	--	--	--	--	--	--	--	--	--	--	--	--	--	--	--	--	--	--	--	--
i0_HQ_sampled12fd9_c24747_f4p0_848	gi|1028915295|emb|SAY41336.1|	glutathione S-transferase [Gammarus pulex]	Q9Z1B2.3	RecName: Full=Glutathione S-transferase Mu 5; AltName: Full=GST class-mu 5	gja:107106427	K00799	GST, gst	glutathione S-transferase	ko00982|ko00480|ko00980	Drug metabolism - cytochrome P450|Glutathione metabolism|Metabolism of xenobiotics by cytochrome P450	--	--	--	--	--	O	ENOG4110YU0	Glutathione S-transferase, mu	--	--	--
i0_HQ_sampled12fd9_c24748_f5p0_394	--	--	--	--	--	--	--	--	--	--	--	--	--	--	--	--	--	--	--	--	--
i0_HQ_sampled12fd9_c24760_f3p0_602	gi|321477047|gb|EFX88006.1|	hypothetical protein DAPPUDRAFT_311515 [Daphnia pulex]	--	--	--	--	--	--	--	--	--	--	--	--	--	--	--	--	Molecular Function: structural constituent of cuticle (GO:0042302);	--	--
i0_HQ_sampled12fd9_c24768_f4p0_957	gi|195436937|ref|XP_002066402.1|	uncharacterized protein Dwil_GK18114 [Drosophila willistoni]	Q9V3Y3.1	RecName: Full=Defense protein l(2)34Fc; Flags: Precursor	--	--	--	--	--	--	--	--	--	--	--	S	ENOG41123CK	Defense protein	--	--	--
i0_HQ_sampled12fd9_c24771_f2p0_384	--	--	--	--	--	--	--	--	--	--	--	--	--	--	--	--	--	--	--	--	--
i0_HQ_sampled12fd9_c24777_f7p0_462	--	--	--	--	--	--	--	--	--	--	--	--	--	--	--	--	--	--	--	--	--
i0_HQ_sampled12fd9_c24781_f2p0_337	--	--	--	--	--	--	--	--	--	--	--	--	--	--	--	--	--	--	--	--	--
i0_HQ_sampled12fd9_c24784_f4p0_555	gi|998520244|ref|XP_015521092.1|	PREDICTED: probable N-acetyltransferase san [Neodiprion lecontei]	Q6PGB6.1	RecName: Full=N-alpha-acetyltransferase 50; AltName: Full=N-acetyltransferase NAT13; AltName: Full=NatE catalytic subunit	--	--	--	--	--	--	--	--	--	--	--	S	COG0456	acetyltransferase	--	--	--
i0_HQ_sampled12fd9_c2478_f2p0_440	--	--	--	--	--	--	--	--	--	--	--	--	--	--	--	--	--	--	--	--	--
i0_HQ_sampled12fd9_c24790_f3p0_418	--	--	--	--	--	--	--	--	--	--	--	--	--	--	--	--	--	--	--	--	--
i0_HQ_sampled12fd9_c24791_f2p0_581	--	--	--	--	--	--	--	--	--	--	--	--	--	--	--	--	--	--	--	--	--
i0_HQ_sampled12fd9_c24794_f2p0_972	--	--	--	--	--	--	--	--	--	--	--	--	--	--	--	--	--	--	--	--	--
i0_HQ_sampled12fd9_c24800_f3p0_855	gi|321460097|gb|EFX71143.1|	hypothetical protein DAPPUDRAFT_231562 [Daphnia pulex]	Q14197.1	RecName: Full=Peptidyl-tRNA hydrolase ICT1, mitochondrial; AltName: Full=39S ribosomal protein L58, mitochondrial; Short=MRP-L58; AltName: Full=Digestion substraction 1; Short=DS-1; AltName: Full=Immature colon carcinoma transcript 1 protein; AltName: Full=Mitochondrial large ribosomal subunit protein mL62; Flags: Precursor	tca:662586	K15033	ICT1	peptidyl-tRNA hydrolase ICT1	--	--	--	--	--	--	--	J	COG1186	Peptide chain release factor 2 directs the termination of translation in response to the peptide chain termination codons UGA and UAA (By similarity)	Molecular Function: translation release factor activity (GO:0003747);|Biological Process: translational termination (GO:0006415);	--	--
i0_HQ_sampled12fd9_c24820_f2p0_381	--	--	--	--	--	--	--	--	--	--	--	--	--	--	--	--	--	--	--	--	--
i0_HQ_sampled12fd9_c24823_f5p0_558	--	--	--	--	--	--	--	--	--	--	--	--	--	--	--	--	--	--	--	--	--
i0_HQ_sampled12fd9_c24824_f2p0_486	--	--	--	--	--	--	--	--	--	--	--	--	--	--	--	--	--	--	--	--	--
i0_HQ_sampled12fd9_c24825_f2p9_993	--	--	--	--	--	--	--	--	--	--	--	--	--	--	--	--	--	--	--	--	--
i0_HQ_sampled12fd9_c24826_f2p0_322	gi|924555812|gb|ALC41085.1|	Bap55, partial [Drosophila busckii]	Q9Z2N8.2	RecName: Full=Actin-like protein 6A; AltName: Full=53 kDa BRG1-associated factor A; AltName: Full=Actin-related protein Baf53a; AltName: Full=BRG1-associated factor 53A; Short=BAF53A	aga:AgaP_AGAP008687	K11652	ACTL6B	actin-like protein 6B	--	--	KOG0679	Actin-related protein - Arp4p/Act3p	[Z]	CELLULAR PROCESSES AND SIGNALING	Cytoskeleton	Z	COG5277	Actin-related protein	Biological Process: DNA repair (GO:0006281);|Biological Process: chromatin remodeling (GO:0006338);|Biological Process: regulation of transcription, DNA-templated (GO:0006355);|Cellular Component: Ino80 complex (GO:0031011);|Cellular Component: NuA4 histone acetyltransferase complex (GO:0035267);	--	--
i0_HQ_sampled12fd9_c24827_f3p1_986	gi|357623789|gb|EHJ74813.1|	hypothetical protein KGM_09253 [Danaus plexippus]	Q8WTC1.2	RecName: Full=28S ribosomal protein S15, mitochondrial; Short=MRP-S15; Short=S15mt; AltName: Full=DmMRPS15; AltName: Full=Protein bonsai; Flags: Precursor	pxy:105396297	K02956	RP-S15, MRPS15, rpsO	small subunit ribosomal protein S15	ko03010	Ribosome	--	--	--	--	--	J	COG0184	Forms an intersubunit bridge (bridge B4) with the 23S rRNA of the 50S subunit in the ribosome (By similarity)	--	--	--
i0_HQ_sampled12fd9_c24854_f4p13_853	gi|942299255|gb|JAN31560.1|	Prefoldin subunit [Daphnia magna]	Q3SZE2.1	RecName: Full=Prefoldin subunit 1	bfo:BRAFLDRAFT_113482	K09548	PFDN1	prefoldin subunit 1	--	--	--	--	--	--	--	O	ENOG4111W40	Prefoldin, subunit	--	--	--
i0_HQ_sampled12fd9_c24859_f2p0_612	--	--	--	--	--	--	--	--	--	--	--	--	--	--	--	--	--	--	--	--	--
i0_HQ_sampled12fd9_c24863_f5p0_409	--	--	--	--	--	--	--	--	--	--	--	--	--	--	--	--	--	--	--	--	--
i0_HQ_sampled12fd9_c24872_f9p0_479	gi|939280623|ref|XP_014260924.1|	PREDICTED: uncharacterized protein LOC106673349 [Cimex lectularius]	--	--	--	--	--	--	--	--	--	--	--	--	--	S	ENOG410XXY6	NA	--	--	--
i0_HQ_sampled12fd9_c24875_f3p3_362	--	--	--	--	--	--	--	--	--	--	--	--	--	--	--	--	--	--	--	--	--
i0_HQ_sampled12fd9_c24877_f3p73_406	--	--	--	--	--	--	--	--	--	--	--	--	--	--	--	--	--	--	--	--	--
i0_HQ_sampled12fd9_c24903_f3p4_363	--	--	--	--	--	--	--	--	--	--	--	--	--	--	--	--	--	--	--	--	--
i0_HQ_sampled12fd9_c24906_f7p0_327	--	--	--	--	--	--	--	--	--	--	--	--	--	--	--	--	--	--	--	--	--
i0_HQ_sampled12fd9_c24909_f5p0_920	gi|3907620|gb|AAC78681.1|	actin 1 [Penaeus monodon]	P49871.1	RecName: Full=Actin, muscle; Flags: Precursor	rro:104675775	K05692	ACTB_G1	actin beta/gamma 1	ko04145|ko04520|ko04670|ko04015|ko04390|ko04611|ko04391|ko04510|ko04745|ko04810|ko04530|ko04919|ko04210|ko04921	Phagosome|Adherens junction|Leukocyte transendothelial migration|Rap1 signaling pathway|Hippo signaling pathway|Platelet activation|Hippo signaling pathway - fly|Focal adhesion|Phototransduction - fly|Regulation of actin cytoskeleton|Tight junction|Thyroid hormone signaling pathway|Apoptosis|Oxytocin signaling pathway	KOG0676	Actin and related proteins	[Z]	CELLULAR PROCESSES AND SIGNALING	Cytoskeleton	Z	COG5277	Actin-related protein	Molecular Function: ATP binding (GO:0005524);	--	--
i0_HQ_sampled12fd9_c24911_f3p0_853	gi|385100000|ref|YP_006234443.1|	COX1 gene product (mitochondrion) [Gammarus duebeni]	P34838.1	RecName: Full=Cytochrome c oxidase subunit 1; AltName: Full=Cytochrome c oxidase polypeptide I	cqu:COX1	K02256	COX1	cytochrome c oxidase subunit 1	ko00190|ko04260	Oxidative phosphorylation|Cardiac muscle contraction	--	--	--	--	--	C	COG0843	Cytochrome C oxidase subunit I	Molecular Function: cytochrome-c oxidase activity (GO:0004129);|Molecular Function: iron ion binding (GO:0005506);|Cellular Component: mitochondrial inner membrane (GO:0005743);|Biological Process: oxidative phosphorylation (GO:0006119);|Biological Process: aerobic respiration (GO:0009060);|Cellular Component: integral component of membrane (GO:0016021);|Molecular Function: heme binding (GO:00200…	--	--
i0_HQ_sampled12fd9_c24914_f3p0_457	--	--	--	--	--	--	--	--	--	--	--	--	--	--	--	--	--	--	--	--	--
i0_HQ_sampled12fd9_c24926_f2p0_818	--	--	--	--	--	--	--	--	--	--	--	--	--	--	--	--	--	--	--	--	--
i0_HQ_sampled12fd9_c24927_f5p0_337	--	--	--	--	--	--	--	--	--	--	--	--	--	--	--	--	--	--	--	--	--
i0_HQ_sampled12fd9_c24930_f2p0_613	--	--	--	--	--	--	--	--	--	--	--	--	--	--	--	--	--	--	--	--	--
i0_HQ_sampled12fd9_c24931_f2p7_505	--	--	--	--	--	--	--	--	--	--	--	--	--	--	--	--	--	--	--	--	--
i0_HQ_sampled12fd9_c24932_f4p0_541	--	--	--	--	--	--	--	--	--	--	--	--	--	--	--	--	--	--	--	--	--
i0_HQ_sampled12fd9_c24933_f3p0_754	--	--	--	--	--	--	--	--	--	--	--	--	--	--	--	--	--	--	--	--	--
i0_HQ_sampled12fd9_c24936_f2p0_337	--	--	--	--	--	--	--	--	--	--	--	--	--	--	--	--	--	--	--	--	--
i0_HQ_sampled12fd9_c24940_f2p0_971	gi|371929005|gb|AEX59149.1|	ecdysteroid regulated-like protein [Litopenaeus vannamei]	--	--	--	--	--	--	--	--	--	--	--	--	--	--	--	--	--	--	--
i0_HQ_sampled12fd9_c24947_f4p0_872	--	--	--	--	--	--	--	--	--	--	--	--	--	--	--	--	--	--	--	--	--
i0_HQ_sampled12fd9_c24956_f3p0_558	gi|291242664|ref|XP_002741224.1|	PREDICTED: NHP2-like protein 1-like [Saccoglossus kowalevskii]	Q21568.1	RecName: Full=NHP2-like protein 1 homolog	sko:100371232	K12845	SNU13, NHP2L	U4/U6 small nuclear ribonucleoprotein SNU13	ko03008|ko03040	Ribosome biogenesis in eukaryotes|Spliceosome	--	--	--	--	--	J	COG1358	(ribosomal) protein	--	--	--
i0_HQ_sampled12fd9_c24957_f3p0_902	--	--	--	--	--	--	--	--	--	--	--	--	--	--	--	--	--	--	--	--	--
i0_HQ_sampled12fd9_c249632_f2p0_278	--	--	--	--	--	--	--	--	--	--	--	--	--	--	--	--	--	--	--	--	--
i0_HQ_sampled12fd9_c24972_f6p0_775	gi|556523269|gb|AGZ62051.1|	gastrolith protein 30 [Cherax quadricarinatus]	--	--	--	--	--	--	--	--	--	--	--	--	--	S	ENOG410ZSCN	Cuticular protein analogous to peritrophins 3-A1	--	--	--
i0_HQ_sampled12fd9_c24975_f4p0_323	--	--	--	--	--	--	--	--	--	--	--	--	--	--	--	--	--	--	--	--	--
i0_HQ_sampled12fd9_c2497_f3p3_403	--	--	--	--	--	--	--	--	--	--	--	--	--	--	--	--	--	--	--	--	--
i0_HQ_sampled12fd9_c24980_f2p1_962	--	--	--	--	--	--	--	--	--	--	--	--	--	--	--	--	--	--	--	--	--
i0_HQ_sampled12fd9_c25009_f3p1_468	--	--	--	--	--	--	--	--	--	--	--	--	--	--	--	--	--	--	--	--	--
i0_HQ_sampled12fd9_c25018_f7p0_874	--	--	--	--	--	--	--	--	--	--	--	--	--	--	--	--	--	--	--	--	--
i0_HQ_sampled12fd9_c25052_f2p0_692	--	--	--	--	--	--	--	--	--	--	--	--	--	--	--	--	--	--	--	--	--
i0_HQ_sampled12fd9_c25201_f4p0_990	--	--	--	--	--	--	--	--	--	--	--	--	--	--	--	--	--	--	--	--	--
i0_HQ_sampled12fd9_c2521_f4p0_450	gi|321478949|gb|EFX89905.1|	hypothetical protein DAPPUDRAFT_299805 [Daphnia pulex]	P80007.1	RecName: Full=Crustacyanin-A2 subunit	mze:101484420	K03098	APOD	apolipoprotein D and lipocalin family protein	--	--	--	--	--	--	--	--	--	--	--	--	--
i0_HQ_sampled12fd9_c2530_f4p0_438	--	--	--	--	--	--	--	--	--	--	--	--	--	--	--	--	--	--	--	--	--
i0_HQ_sampled12fd9_c25310_f2p0_541	--	--	--	--	--	--	--	--	--	--	--	--	--	--	--	--	--	--	--	--	--
i0_HQ_sampled12fd9_c253182_f2p0_865	gi|7414466|emb|CAB85964.1|	phosphoenolpyruvate carboxykinase [Litopenaeus vannamei]	Q16822.3	RecName: Full=Phosphoenolpyruvate carboxykinase [GTP], mitochondrial; Short=PEPCK-M; Flags: Precursor	bfo:BRAFLDRAFT_68589	K01596	E4.1.1.32, pckA, PCK	phosphoenolpyruvate carboxykinase (GTP)	ko04920|ko00620|ko04922|ko00020|ko04152|ko04964|ko04910|ko04068|ko03320|ko04151|ko00010	Adipocytokine signaling pathway|Pyruvate metabolism|Glucagon signaling pathway|Citrate cycle (TCA cycle)|AMPK signaling pathway|Proximal tubule bicarbonate reclamation|Insulin signaling pathway|FoxO signaling pathway|PPAR signaling pathway|PI3K-Akt signaling pathway|Glycolysis / Gluconeogenesis	--	--	--	--	--	C	COG1274	Catalyzes the conversion of oxaloacetate (OAA) to phosphoenolpyruvate (PEP), the rate-limiting step in the metabolic pathway that produces glucose from lactate and other precursors derived from the citric acid cycle (By similarity)	Molecular Function: phosphoenolpyruvate carboxykinase (GTP) activity (GO:0004613);|Molecular Function: GTP binding (GO:0005525);|Biological Process: gluconeogenesis (GO:0006094);|Molecular Function: kinase activity (GO:0016301);|Biological Process: phosphorylation (GO:0016310);	--	--
i0_HQ_sampled12fd9_c253723_f4p0_324	--	--	--	--	--	--	--	--	--	--	--	--	--	--	--	--	--	--	--	--	--
i0_HQ_sampled12fd9_c25379_f2p0_787	--	--	--	--	--	--	--	--	--	--	--	--	--	--	--	--	--	--	--	--	--
i0_HQ_sampled12fd9_c25416_f2p0_459	--	--	--	--	--	--	--	--	--	--	--	--	--	--	--	--	--	--	--	--	--
i0_HQ_sampled12fd9_c25481_f4p0_347	--	--	--	--	--	--	--	--	--	--	--	--	--	--	--	--	--	--	--	--	--
i0_HQ_sampled12fd9_c25493_f3p8_270	--	--	--	--	--	--	--	--	--	--	--	--	--	--	--	--	--	--	--	--	--
i0_HQ_sampled12fd9_c25618_f2p0_497	--	--	--	--	--	--	--	--	--	--	--	--	--	--	--	--	--	--	--	--	--
i0_HQ_sampled12fd9_c25644_f4p3_992	--	--	--	--	--	--	--	--	--	--	--	--	--	--	--	--	--	--	--	--	--
i0_HQ_sampled12fd9_c25756_f2p0_676	--	--	--	--	--	--	--	--	--	--	--	--	--	--	--	--	--	--	--	--	--
i0_HQ_sampled12fd9_c257953_f2p0_355	--	--	--	--	--	--	--	--	--	--	--	--	--	--	--	--	--	--	--	--	--
i0_HQ_sampled12fd9_c25854_f2p2_871	--	--	--	--	--	--	--	--	--	--	--	--	--	--	--	--	--	--	--	--	--
i0_HQ_sampled12fd9_c25928_f2p0_731	--	--	--	--	--	--	--	--	--	--	--	--	--	--	--	--	--	--	--	--	--
i0_HQ_sampled12fd9_c25979_f2p0_511	--	--	--	--	--	--	--	--	--	--	--	--	--	--	--	--	--	--	--	--	--
i0_HQ_sampled12fd9_c2599_f2p0_448	--	--	--	--	--	--	--	--	--	--	--	--	--	--	--	--	--	--	--	--	--
i0_HQ_sampled12fd9_c259_f24p0_885	gi|238816825|gb|ACR56783.1|	small ubiquitin-like modifier-1 [Litopenaeus vannamei]	P55853.1	RecName: Full=Small ubiquitin-related modifier; Short=SUMO; AltName: Full=Ubiquitin-like protein SMT3; Flags: Precursor	soc:105193073	K12160	SUMO, SMT3	small ubiquitin-related modifier	ko03013	RNA transport	--	--	--	--	--	O	COG5227	smt3 suppressor of mif two 3 homolog	Cellular Component: nucleus (GO:0005634);	--	--
i0_HQ_sampled12fd9_c2600_f2p5_609	--	--	--	--	--	--	--	--	--	--	--	--	--	--	--	--	--	--	--	--	--
i0_HQ_sampled12fd9_c2603_f14p0_632	gi|999985240|gb|KXJ24381.1|	Microsomal glutathione S-transferase 3 [Exaiptasia pallida]	Q9CPU4.1	RecName: Full=Microsomal glutathione S-transferase 3; Short=Microsomal GST-3; AltName: Full=Microsomal GST-III	nve:NEMVE_v1g240887	K00799	GST, gst	glutathione S-transferase	ko00982|ko00480|ko00980	Drug metabolism - cytochrome P450|Glutathione metabolism|Metabolism of xenobiotics by cytochrome P450	--	--	--	--	--	O	ENOG4111URX	microsomal glutathione S-transferase	--	--	--
i0_HQ_sampled12fd9_c26164_f2p0_374	--	--	--	--	--	--	--	--	--	--	--	--	--	--	--	--	--	--	--	--	--
i0_HQ_sampled12fd9_c2627_f6p2_825	--	--	--	--	--	--	--	--	--	--	--	--	--	--	--	--	--	--	--	--	--
i0_HQ_sampled12fd9_c26303_f4p0_954	gi|72013892|ref|XP_783243.1|	PREDICTED: ribosome biogenesis protein NSA2 homolog [Strongylocentrotus purpuratus]	Q9CR47.1	RecName: Full=Ribosome biogenesis protein NSA2 homolog; AltName: Full=L-name-related protein 42; Short=LNR42; AltName: Full=TGF-beta-inducible nuclear protein 1	spu:577954	K14842	NSA2	ribosome biogenesis protein NSA2	--	--	--	--	--	--	--	J	COG2007	40S ribosomal protein S8	Biological Process: maturation of 5.8S rRNA (GO:0000460);|Biological Process: maturation of LSU-rRNA (GO:0000470);|Cellular Component: nucleolus (GO:0005730);|Cellular Component: preribosome, large subunit precursor (GO:0030687);	--	--
i0_HQ_sampled12fd9_c26311_f2p0_289	--	--	--	--	--	--	--	--	--	--	--	--	--	--	--	--	--	--	--	--	--
i0_HQ_sampled12fd9_c26315_f2p0_293	--	--	--	--	--	--	--	--	--	--	--	--	--	--	--	--	--	--	--	--	--
i0_HQ_sampled12fd9_c26381_f3p5_414	--	--	--	--	--	--	--	--	--	--	--	--	--	--	--	--	--	--	--	--	--
i0_HQ_sampled12fd9_c263_f21p0_626	gi|646690477|gb|KDR06880.1|	NADH dehydrogenase [ubiquinone] 1 beta subcomplex subunit 8, mitochondrial [Zootermopsis nevadensis]	Q02372.1	RecName: Full=NADH dehydrogenase [ubiquinone] 1 beta subcomplex subunit 8, mitochondrial; AltName: Full=Complex I-ASHI; Short=CI-ASHI; AltName: Full=NADH-ubiquinone oxidoreductase ASHI subunit; Flags: Precursor	pss:102461568	K03964	NDUFB8	NADH dehydrogenase (ubiquinone) 1 beta subcomplex subunit 8	ko00190	Oxidative phosphorylation	--	--	--	--	--	C	ENOG4111WEY	NADH dehydrogenase (ubiquinone) 1 beta subcomplex	Molecular Function: NADH dehydrogenase activity (GO:0003954);|Cellular Component: membrane (GO:0016020);	--	--
i0_HQ_sampled12fd9_c26434_f2p0_798	--	--	--	--	--	--	--	--	--	--	--	--	--	--	--	--	--	--	--	--	--
i0_HQ_sampled12fd9_c26436_f2p0_796	--	--	--	--	--	--	--	--	--	--	--	--	--	--	--	--	--	--	--	--	--
i0_HQ_sampled12fd9_c26445_f3p0_969	--	--	--	--	--	--	--	--	--	--	--	--	--	--	--	--	--	--	--	--	--
i0_HQ_sampled12fd9_c26516_f2p0_452	--	--	--	--	--	--	--	--	--	--	--	--	--	--	--	--	--	--	--	--	--
i0_HQ_sampled12fd9_c265346_f2p0_424	--	--	--	--	--	--	--	--	--	--	--	--	--	--	--	--	--	--	--	--	--
i0_HQ_sampled12fd9_c26574_f2p0_903	gi|762116192|ref|XP_011440919.1|	PREDICTED: 60S ribosomal protein L13-like [Crassostrea gigas]	P41123.2	RecName: Full=60S ribosomal protein L13	crg:105337746	K02873	RP-L13e, RPL13	large subunit ribosomal protein L13e	ko03010	Ribosome	--	--	--	--	--	J	COG4352	cytoplasmic translation	Molecular Function: structural constituent of ribosome (GO:0003735);|Cellular Component: ribosome (GO:0005840);|Biological Process: translation (GO:0006412);	--	--
i0_HQ_sampled12fd9_c2657_f10p14_567	--	--	--	--	--	--	--	--	--	--	--	--	--	--	--	--	--	--	--	--	--
i0_HQ_sampled12fd9_c2658_f2p0_510	--	--	--	--	--	--	--	--	--	--	--	--	--	--	--	--	--	--	--	--	--
i0_HQ_sampled12fd9_c266394_f2p1_265	--	--	--	--	--	--	--	--	--	--	--	--	--	--	--	--	--	--	--	--	--
i0_HQ_sampled12fd9_c26657_f2p0_546	gi|40643018|emb|CAD91436.1|	ribosomal protein S27-1, partial [Crassostrea gigas]	P55833.2	RecName: Full=40S ribosomal protein S27	crg:105323167	K02978	RP-S27e, RPS27	small subunit ribosomal protein S27e	ko03010	Ribosome	--	--	--	--	--	J	COG2051	40s ribosomal protein S27	Cellular Component: intracellular ribonucleoprotein complex (GO:0030529);	--	--
i0_HQ_sampled12fd9_c267252_f2p3_228	--	--	--	--	--	--	--	--	--	--	--	--	--	--	--	--	--	--	--	--	--
i0_HQ_sampled12fd9_c26742_f2p11_703	--	--	--	--	--	--	--	--	--	--	--	--	--	--	--	--	--	--	--	--	--
i0_HQ_sampled12fd9_c267743_f2p0_284	--	--	--	--	--	--	--	--	--	--	--	--	--	--	--	--	--	--	--	--	--
i0_HQ_sampled12fd9_c26826_f2p0_304	--	--	--	--	--	--	--	--	--	--	--	--	--	--	--	--	--	--	--	--	--
i0_HQ_sampled12fd9_c269185_f2p0_235	--	--	--	--	--	--	--	--	--	--	--	--	--	--	--	--	--	--	--	--	--
i0_HQ_sampled12fd9_c26955_f4p0_593	--	--	--	--	--	--	--	--	--	--	--	--	--	--	--	--	--	--	--	--	--
i0_HQ_sampled12fd9_c27057_f2p0_529	--	--	--	--	--	--	--	--	--	--	--	--	--	--	--	--	--	--	--	--	--
i0_HQ_sampled12fd9_c2710_f4p0_603	--	--	--	--	--	--	--	--	--	--	--	--	--	--	--	--	--	--	--	--	--
i0_HQ_sampled12fd9_c2723_f3p0_1007	gi|557773115|ref|XP_005186211.1|	PREDICTED: probable ribosome biogenesis protein RLP24 [Musca domestica]	Q7ZTZ2.1	RecName: Full=Probable ribosome biogenesis protein RLP24; AltName: Full=Ribosomal L24 domain-containing protein 1	mde:101891241	K02896	RP-L24e, RPL24	large subunit ribosomal protein L24e	ko03010	Ribosome	--	--	--	--	--	J	COG2075	Ribosomal protein	--	--	--
i0_HQ_sampled12fd9_c27288_f2p6_445	gi|646720059|gb|KDR21926.1|	39S ribosomal protein L16, mitochondrial [Zootermopsis nevadensis]	Q3T0J3.1	RecName: Full=39S ribosomal protein L16, mitochondrial; Short=L16mt; Short=MRP-L16; Flags: Precursor	mde:101892186	K02878	RP-L16, MRPL16, rplP	large subunit ribosomal protein L16	ko03010	Ribosome	--	--	--	--	--	J	COG0197	Binds 23S rRNA and is also seen to make contacts with the A and possibly P site tRNAs (By similarity)	--	--	--
i0_HQ_sampled12fd9_c2737_f2p0_510	--	--	--	--	--	--	--	--	--	--	--	--	--	--	--	--	--	--	--	--	--
i0_HQ_sampled12fd9_c27396_f2p0_732	--	--	--	--	--	--	--	--	--	--	--	--	--	--	--	--	--	--	--	--	--
i0_HQ_sampled12fd9_c27430_f3p0_583	--	--	--	--	--	--	--	--	--	--	--	--	--	--	--	--	--	--	--	--	--
i0_HQ_sampled12fd9_c27538_f3p0_580	--	--	--	--	--	--	--	--	--	--	--	--	--	--	--	--	--	--	--	--	--
i0_HQ_sampled12fd9_c27676_f3p0_703	gi|585661983|ref|XP_006816667.1|	PREDICTED: uncharacterized protein LOC102806440, partial [Saccoglossus kowalevskii]	--	--	--	--	--	--	--	--	KOG0017	FOG: Transposon-encoded proteins with TYA, reverse transcriptase, integrase domains in various combinations	[R]	POORLY CHARACTERIZED	General function prediction only	S	ENOG410XRTP	NA	--	--	--
i0_HQ_sampled12fd9_c2767_f2p7_417	--	--	--	--	--	--	--	--	--	--	--	--	--	--	--	--	--	--	--	--	--
i0_HQ_sampled12fd9_c27777_f3p0_376	--	--	--	--	--	--	--	--	--	--	--	--	--	--	--	--	--	--	--	--	--
i0_HQ_sampled12fd9_c27879_f3p0_947	gi|3915093|sp|Q94571.1|TBB2_HOMAM	RecName: Full=Tubulin beta-2 chain; AltName: Full=Beta-II tubulin	Q94571.1	RecName: Full=Tubulin beta-2 chain; AltName: Full=Beta-II tubulin	cel:CELE_C54C6.2	K07375	TUBB	tubulin beta	ko04540|ko04145	Gap junction|Phagosome	--	--	--	--	--	Z	COG5023	protein polymerization	Molecular Function: GTPase activity (GO:0003924);|Molecular Function: structural constituent of cytoskeleton (GO:0005200);|Molecular Function: GTP binding (GO:0005525);|Cellular Component: cytoplasm (GO:0005737);|Cellular Component: microtubule (GO:0005874);|Biological Process: microtubule-based process (GO:0007017);	--	--
i0_HQ_sampled12fd9_c27935_f2p8_750	--	--	--	--	--	--	--	--	--	--	--	--	--	--	--	--	--	--	--	--	--
i0_HQ_sampled12fd9_c28020_f2p0_258	--	--	--	--	--	--	--	--	--	--	--	--	--	--	--	--	--	--	--	--	--
i0_HQ_sampled12fd9_c28022_f2p0_482	gi|242021455|ref|XP_002431160.1|	conserved hypothetical protein [Pediculus humanus corporis]	Q9VAI0.1	RecName: Full=Probable glucosamine 6-phosphate N-acetyltransferase; AltName: Full=Phosphoglucosamine acetylase; AltName: Full=Phosphoglucosamine transacetylase	phu:Phum_PHUM514050	K00621	GNPNAT1, GNA1	glucosamine-phosphate N-acetyltransferase	ko00520	Amino sugar and nucleotide sugar metabolism	--	--	--	--	--	K	COG0454	acetyltransferase	--	--	--
i0_HQ_sampled12fd9_c28037_f4p1_581	--	--	--	--	--	--	--	--	--	--	--	--	--	--	--	--	--	--	--	--	--
i0_HQ_sampled12fd9_c28075_f3p1_298	--	--	--	--	--	--	--	--	--	--	--	--	--	--	--	--	--	--	--	--	--
i0_HQ_sampled12fd9_c28087_f2p0_885	--	--	--	--	--	--	--	--	--	--	--	--	--	--	--	--	--	--	--	--	--
i0_HQ_sampled12fd9_c2814_f2p0_310	--	--	--	--	--	--	--	--	--	--	--	--	--	--	--	--	--	--	--	--	--
i0_HQ_sampled12fd9_c28455_f3p0_267	--	--	--	--	--	--	--	--	--	--	--	--	--	--	--	--	--	--	--	--	--
i0_HQ_sampled12fd9_c2849_f3p3_518	--	--	--	--	--	--	--	--	--	--	--	--	--	--	--	--	--	--	--	--	--
i0_HQ_sampled12fd9_c28523_f2p0_515	--	--	--	--	--	--	--	--	--	--	--	--	--	--	--	--	--	--	--	--	--
i0_HQ_sampled12fd9_c2853_f4p0_571	gi|631799188|gb|AHZ21076.1|	chitinase [Eriocheir sinensis]	--	--	--	--	--	--	--	--	--	--	--	--	--	--	--	--	--	--	--
i0_HQ_sampled12fd9_c286011_f48p0_452	gi|968046968|ref|XP_002005248.2|	uncharacterized protein Dmoj_GI20386, isoform A [Drosophila mojavensis]	Q9W141.1	RecName: Full=Putative ATP synthase subunit f, mitochondrial	dmo:Dmoj_GI20386	K02130	ATPeF0F, ATP5J2	F-type H+-transporting ATPase subunit f	ko00190	Oxidative phosphorylation	--	--	--	--	--	S	ENOG4111PBN	ATP synthase, H transporting, mitochondrial Fo complex, subunit F2	Cellular Component: membrane (GO:0016020);	--	--
i0_HQ_sampled12fd9_c286014_f37p0_878	gi|1033208581|gb|ANH58178.1|	delta class glutathione S-transferase [Fenneropenaeus chinensis]	Q93113.1	RecName: Full=Glutathione S-transferase 1, isoform D; AltName: Full=AgGst1-alpha; AltName: Full=Aggst1-1; AltName: Full=Aggst1-6; AltName: Full=Aggst2-1; AltName: Full=DDT-dehydrochlorinase; AltName: Full=GST class-theta	tca:663147	K00799	GST, gst	glutathione S-transferase	ko00982|ko00480|ko00980	Drug metabolism - cytochrome P450|Glutathione metabolism|Metabolism of xenobiotics by cytochrome P450	--	--	--	--	--	O	COG0625	glutathione Stransferase	--	--	--
i0_HQ_sampled12fd9_c286022_f16p0_550	--	--	--	--	--	--	--	--	--	--	--	--	--	--	--	--	--	--	--	--	--
i0_HQ_sampled12fd9_c286024_f42p0_583	gi|300791208|gb|ADK34020.1|	ribosomal protein S15 [Prionchulus punctatus]	P70066.1	RecName: Full=40S ribosomal protein S15; AltName: Full=RIG protein	bfo:BRAFLDRAFT_99641	K02958	RP-S15e, RPS15	small subunit ribosomal protein S15e	ko03010	Ribosome	--	--	--	--	--	J	COG0185	Protein S19 forms a complex with S13 that binds strongly to the 16S ribosomal RNA (By similarity)	Molecular Function: RNA binding (GO:0003723);|Molecular Function: structural constituent of ribosome (GO:0003735);|Biological Process: translation (GO:0006412);|Cellular Component: small ribosomal subunit (GO:0015935);	--	--
i0_HQ_sampled12fd9_c286027_f20p0_634	--	--	--	--	--	--	--	--	--	--	--	--	--	--	--	--	--	--	--	--	--
i0_HQ_sampled12fd9_c286028_f15p0_968	--	--	--	--	--	--	--	--	--	--	--	--	--	--	--	--	--	--	--	--	--
i0_HQ_sampled12fd9_c286030_f8p0_994	gi|1035596288|ref|XP_016905506.1|	PREDICTED: tropomyosin alpha-1 chain isoform X4 [Apis cerana]	--	--	ame:408583	K10373	TPM1	tropomyosin 1	ko04261|ko04260	Adrenergic signaling in cardiomyocytes|Cardiac muscle contraction	--	--	--	--	--	Z	ENOG410XR5K	Tropomyosin	--	--	--
i0_HQ_sampled12fd9_c286037_f37p0_687	--	--	--	--	--	--	--	--	--	--	--	--	--	--	--	--	--	--	--	--	--
i0_HQ_sampled12fd9_c286038_f3p0_283	--	--	--	--	--	--	--	--	--	--	--	--	--	--	--	--	--	--	--	--	--
i0_HQ_sampled12fd9_c286047_f38p0_542	gi|961376194|gb|ALS04841.1|	60S ribosomal protein L35a [Pseudodiaptomus poplesia]	P49180.3	RecName: Full=60S ribosomal protein L35a	cfo:105249114	K02917	RP-L35Ae, RPL35A	large subunit ribosomal protein L35Ae	ko03010	Ribosome	--	--	--	--	--	J	COG2451	Ribosomal protein	Cellular Component: intracellular (GO:0005622);	--	--
i0_HQ_sampled12fd9_c286048_f10p0_663	gi|682331622|gb|AIN36963.1|	M15 protein [Cherax quadricarinatus]	Q7M4F2.1	RecName: Full=Endocuticle structural glycoprotein SgAbd-8	--	--	--	--	--	--	--	--	--	--	--	S	ENOG4111PJ1	Cuticular protein	--	--	--
i0_HQ_sampled12fd9_c286057_f3p0_862	--	--	--	--	--	--	--	--	--	--	--	--	--	--	--	--	--	--	--	--	--
i0_HQ_sampled12fd9_c286066_f5p1_646	--	--	--	--	--	--	--	--	--	--	--	--	--	--	--	--	--	--	--	--	--
i0_HQ_sampled12fd9_c286073_f15p0_384	--	--	--	--	--	--	--	--	--	--	--	--	--	--	--	--	--	--	--	--	--
i0_HQ_sampled12fd9_c286081_f4p0_272	--	--	--	--	--	--	--	--	--	--	--	--	--	--	--	--	--	--	--	--	--
i0_HQ_sampled12fd9_c286084_f6p0_555	gi|512911411|ref|XP_004927405.1|	PREDICTED: cytochrome c oxidase subunit 6B1 isoform X2 [Bombyx mori]	O94581.2	RecName: Full=Cytochrome c oxidase subunit 6B; AltName: Full=Cytochrome c oxidase polypeptide VIb	sko:102805462	K02267	COX6B	cytochrome c oxidase subunit 6b	ko00190|ko04260	Oxidative phosphorylation|Cardiac muscle contraction	--	--	--	--	--	O	ENOG41121WM	cytochrome C oxidase	--	--	--
i0_HQ_sampled12fd9_c286088_f2p0_235	--	--	--	--	--	--	--	--	--	--	--	--	--	--	--	--	--	--	--	--	--
i0_HQ_sampled12fd9_c286095_f2p0_500	--	--	--	--	--	--	--	--	--	--	--	--	--	--	--	--	--	--	--	--	--
i0_HQ_sampled12fd9_c286111_f2p0_573	gi|936705663|ref|XP_014230796.1|	PREDICTED: 60S ribosomal protein L7a-like [Trichogramma pretiosum]	O76732.2	RecName: Full=60S ribosomal protein L7a	hst:105191490	K02936	RP-L7Ae, RPL7A	large subunit ribosomal protein L7Ae	ko03010	Ribosome	--	--	--	--	--	J	COG1358	(ribosomal) protein	--	--	--
i0_HQ_sampled12fd9_c286116_f5p0_645	--	--	--	--	--	--	--	--	--	--	--	--	--	--	--	--	--	--	--	--	--
i0_HQ_sampled12fd9_c286120_f62p0_992	--	--	--	--	--	--	--	--	--	--	--	--	--	--	--	--	--	--	--	--	--
i0_HQ_sampled12fd9_c286140_f6p0_291	--	--	--	--	--	--	--	--	--	--	--	--	--	--	--	--	--	--	--	--	--
i0_HQ_sampled12fd9_c286173_f31p0_652	--	--	--	--	--	--	--	--	--	--	--	--	--	--	--	--	--	--	--	--	--
i0_HQ_sampled12fd9_c286181_f21p0_527	gi|155966141|gb|ABU41025.1|	putative cuticle protein [Lepeophtheirus salmonis]	--	--	--	--	--	--	--	--	--	--	--	--	--	S	ENOG4111Y42	Cuticular protein	Cellular Component: extracellular region (GO:0005576);|Biological Process: chitin metabolic process (GO:0006030);|Molecular Function: chitin binding (GO:0008061);	--	--
i0_HQ_sampled12fd9_c286187_f2p0_254	--	--	--	--	--	--	--	--	--	--	--	--	--	--	--	--	--	--	--	--	--
i0_HQ_sampled12fd9_c286196_f25p0_380	gi|385100011|ref|YP_006234454.1|	ND1 gene product (mitochondrion) [Gammarus duebeni]	B0FWD8.1	RecName: Full=NADH-ubiquinone oxidoreductase chain 1; AltName: Full=NADH dehydrogenase subunit 1	mde:20358598	K03878	ND1	NADH-ubiquinone oxidoreductase chain 1	ko00190	Oxidative phosphorylation	--	--	--	--	--	C	COG1005	NDH-1 shuttles electrons from NADH, via FMN and iron- sulfur (Fe-S) centers, to quinones in the respiratory chain. The immediate electron acceptor for the enzyme in this species is believed to be ubiquinone. Couples the redox reaction to proton translocation (for every two electrons transferred, four hydrogen ions are translocated across the cytoplasmic membrane), and thus conserves the redox ene…	Cellular Component: mitochondrion (GO:0005739);|Cellular Component: membrane (GO:0016020);|Molecular Function: oxidoreductase activity (GO:0016491);	--	--
i0_HQ_sampled12fd9_c286216_f4p0_991	--	--	--	--	--	--	--	--	--	--	--	--	--	--	--	--	--	--	--	--	--
i0_HQ_sampled12fd9_c286224_f51p0_540	gi|646722199|gb|KDR23279.1|	60S ribosomal protein L26 [Zootermopsis nevadensis]	P61256.1	RecName: Full=60S ribosomal protein L26	aga:AgaP_AGAP002468	K02898	RP-L26e, RPL26	large subunit ribosomal protein L26e	ko03010	Ribosome	--	--	--	--	--	J	COG0198	One of the proteins that surrounds the polypeptide exit tunnel on the outside of the subunit (By similarity)	Molecular Function: structural constituent of ribosome (GO:0003735);|Biological Process: translation (GO:0006412);|Cellular Component: large ribosomal subunit (GO:0015934);	--	--
i0_HQ_sampled12fd9_c286227_f7p0_762	--	--	--	--	--	--	--	--	--	--	--	--	--	--	--	--	--	--	--	--	--
i0_HQ_sampled12fd9_c286233_f5p0_365	--	--	--	--	--	--	--	--	--	--	--	--	--	--	--	--	--	--	--	--	--
i0_HQ_sampled12fd9_c286234_f2p0_246	--	--	--	--	--	--	--	--	--	--	--	--	--	--	--	--	--	--	--	--	--
i0_HQ_sampled12fd9_c286241_f85p0_913	gi|682331622|gb|AIN36963.1|	M15 protein [Cherax quadricarinatus]	--	--	--	--	--	--	--	--	--	--	--	--	--	--	--	--	--	--	--
i0_HQ_sampled12fd9_c286242_f3p0_308	--	--	--	--	--	--	--	--	--	--	--	--	--	--	--	--	--	--	--	--	--
i0_HQ_sampled12fd9_c286264_f50p7_967	gi|926620559|ref|XP_013775577.1|	PREDICTED: 60S ribosomal protein L7a-like [Limulus polyphemus]	Q2TBQ5.3	RecName: Full=60S ribosomal protein L7a	xtr:447981	K02936	RP-L7Ae, RPL7A	large subunit ribosomal protein L7Ae	ko03010	Ribosome	--	--	--	--	--	J	COG1358	(ribosomal) protein	--	--	--
i0_HQ_sampled12fd9_c286267_f13p0_856	gi|3006086|emb|CAA75311.1|	trypsin, partial [Litopenaeus vannamei]	P00765.1	RecName: Full=Trypsin-1; AltName: Full=Trypsin I	oaa:100082597	K01310	CTRB	chymotrypsin	--	--	--	--	--	--	--	O	COG5640	protease	--	--	--
i0_HQ_sampled12fd9_c28626_f2p0_279	--	--	--	--	--	--	--	--	--	--	--	--	--	--	--	--	--	--	--	--	--
i0_HQ_sampled12fd9_c286273_f5p0_357	--	--	--	--	--	--	--	--	--	--	--	--	--	--	--	--	--	--	--	--	--
i0_HQ_sampled12fd9_c286275_f3p0_770	gi|10304437|gb|AAG16253.1|AF300705_1	beta-actin [Litopenaeus vannamei]	O42161.1	RecName: Full=Actin, cytoplasmic 1; AltName: Full=Beta-actin; Contains: RecName: Full=Actin, cytoplasmic 1, N-terminally processed	xtr:407952	K05692	ACTB_G1	actin beta/gamma 1	ko04145|ko04520|ko04670|ko04015|ko04390|ko04611|ko04391|ko04510|ko04745|ko04810|ko04530|ko04919|ko04210|ko04921	Phagosome|Adherens junction|Leukocyte transendothelial migration|Rap1 signaling pathway|Hippo signaling pathway|Platelet activation|Hippo signaling pathway - fly|Focal adhesion|Phototransduction - fly|Regulation of actin cytoskeleton|Tight junction|Thyroid hormone signaling pathway|Apoptosis|Oxytocin signaling pathway	KOG0676	Actin and related proteins	[Z]	CELLULAR PROCESSES AND SIGNALING	Cytoskeleton	Z	COG5277	Actin-related protein	Molecular Function: ATP binding (GO:0005524);	--	--
i0_HQ_sampled12fd9_c286312_f2p0_300	--	--	--	--	--	--	--	--	--	--	--	--	--	--	--	--	--	--	--	--	--
i0_HQ_sampled12fd9_c286313_f14p0_844	--	--	--	--	--	--	--	--	--	--	--	--	--	--	--	--	--	--	--	--	--
i0_HQ_sampled12fd9_c286315_f3p0_286	gi|511853173|ref|XP_004750708.1|	PREDICTED: serine protease 33-like [Mustela putorius furo]	Q9JHJ7.2	RecName: Full=Testisin; AltName: Full=Serine protease 21; AltName: Full=Tryptase 4; Flags: Precursor	--	--	--	--	--	--	--	--	--	--	--	O	COG5640	protease	--	--	--
i0_HQ_sampled12fd9_c286330_f5p0_382	--	--	--	--	--	--	--	--	--	--	--	--	--	--	--	--	--	--	--	--	--
i0_HQ_sampled12fd9_c286332_f12p0_674	--	--	--	--	--	--	--	--	--	--	--	--	--	--	--	--	--	--	--	--	--
i0_HQ_sampled12fd9_c286334_f3p0_419	--	--	--	--	--	--	--	--	--	--	--	--	--	--	--	--	--	--	--	--	--
i0_HQ_sampled12fd9_c286345_f5p0_342	--	--	--	--	--	--	--	--	--	--	--	--	--	--	--	--	--	--	--	--	--
i0_HQ_sampled12fd9_c286346_f2p0_356	--	--	--	--	--	--	--	--	--	--	--	--	--	--	--	--	--	--	--	--	--
i0_HQ_sampled12fd9_c286356_f3p0_428	--	--	--	--	--	--	--	--	--	--	--	--	--	--	--	--	--	--	--	--	--
i0_HQ_sampled12fd9_c286374_f2p0_406	--	--	--	--	--	--	--	--	--	--	--	--	--	--	--	--	--	--	--	--	--
i0_HQ_sampled12fd9_c286378_f30p0_927	--	--	--	--	--	--	--	--	--	--	--	--	--	--	--	--	--	--	--	--	--
i0_HQ_sampled12fd9_c286385_f54p0_449	gi|238683649|gb|ACR54103.1|	ATP synthase subunit g [Palaemon varians]	Q5RFH0.1	RecName: Full=ATP synthase subunit g, mitochondrial; Short=ATPase subunit g	dwi:Dwil_GK15246	K02140	ATPeFG, ATP5L, ATP20	F-type H+-transporting ATPase subunit g	ko00190	Oxidative phosphorylation	--	--	--	--	--	I	ENOG4111TZ1	Mitochondrial membrane ATP synthase (F(1)F(0) ATP synthase or Complex V) produces ATP from ADP in the presence of a proton gradient across the membrane which is generated by electron transport complexes of the respiratory chain. F-type ATPases consist of two structural domains, F(1) - containing the extramembraneous catalytic core, and F(0) - containing the membrane proton channel, linked togethe…	--	--	--
i0_HQ_sampled12fd9_c286390_f5p0_422	--	--	--	--	--	--	--	--	--	--	--	--	--	--	--	--	--	--	--	--	--
i0_HQ_sampled12fd9_c286439_f3p0_314	--	--	--	--	--	--	--	--	--	--	--	--	--	--	--	--	--	--	--	--	--
i0_HQ_sampled12fd9_c286441_f3p0_337	--	--	--	--	--	--	--	--	--	--	--	--	--	--	--	--	--	--	--	--	--
i0_HQ_sampled12fd9_c286444_f56p0_444	--	--	--	--	--	--	--	--	--	--	--	--	--	--	--	--	--	--	--	--	--
i0_HQ_sampled12fd9_c286464_f3p0_318	--	--	--	--	--	--	--	--	--	--	--	--	--	--	--	--	--	--	--	--	--
i0_HQ_sampled12fd9_c286469_f4p0_300	--	--	--	--	--	--	--	--	--	--	--	--	--	--	--	--	--	--	--	--	--
i0_HQ_sampled12fd9_c286470_f5p0_395	--	--	--	--	--	--	--	--	--	--	--	--	--	--	--	--	--	--	--	--	--
i0_HQ_sampled12fd9_c286471_f4p0_293	--	--	--	--	--	--	--	--	--	--	--	--	--	--	--	--	--	--	--	--	--
i0_HQ_sampled12fd9_c286476_f8p0_392	gi|999980943|gb|KXJ20117.1|	hypothetical protein AC249_AIPGENE10365 [Exaiptasia pallida]	--	--	--	--	--	--	--	--	--	--	--	--	--	H	COG5146	PaNtothenate Kinase	--	--	--
i0_HQ_sampled12fd9_c286482_f4p0_571	--	--	--	--	--	--	--	--	--	--	--	--	--	--	--	--	--	--	--	--	--
i0_HQ_sampled12fd9_c286486_f2p0_558	--	--	--	--	--	--	--	--	--	--	--	--	--	--	--	--	--	--	--	--	--
i0_HQ_sampled12fd9_c286490_f2p0_479	--	--	--	--	--	--	--	--	--	--	--	--	--	--	--	--	--	--	--	--	--
i0_HQ_sampled12fd9_c286498_f2p0_426	gi|930666641|gb|KPJ07755.1|	Cytochrome c oxidase subunit 6C [Papilio machaon]	Q7YRJ8.1	RecName: Full=Cytochrome c oxidase subunit 6C; AltName: Full=Cytochrome c oxidase polypeptide VIc	api:100160939	K02268	COX6C	cytochrome c oxidase subunit 6c	ko00190|ko04260	Oxidative phosphorylation|Cardiac muscle contraction	--	--	--	--	--	O	ENOG41124VH	cytochrome C oxidase subunit	--	--	--
i0_HQ_sampled12fd9_c286501_f3p0_430	--	--	--	--	--	--	--	--	--	--	--	--	--	--	--	--	--	--	--	--	--
i0_HQ_sampled12fd9_c286508_f4p0_696	gi|110825822|gb|ABH00987.1|	rhodopsin, partial [Litopenaeus vannamei]	P35356.1	RecName: Full=Rhodopsin	ame:413961	K04255	OPN4, Rh2_7	r-opsin	--	--	--	--	--	--	--	U	ENOG410XRW9	Receptor	Molecular Function: G-protein coupled receptor activity (GO:0004930);|Biological Process: G-protein coupled receptor signaling pathway (GO:0007186);|Biological Process: visual perception (GO:0007601);|Biological Process: phototransduction (GO:0007602);|Molecular Function: photoreceptor activity (GO:0009881);|Cellular Component: integral component of membrane (GO:0016021);|Biological Process: prot…	--	--
i0_HQ_sampled12fd9_c286509_f7p0_327	--	--	--	--	--	--	--	--	--	--	--	--	--	--	--	--	--	--	--	--	--
i0_HQ_sampled12fd9_c286515_f2p0_252	gi|385100010|ref|YP_006234453.1|	CYTB gene product (mitochondrion) [Gammarus duebeni]	Q34107.1	RecName: Full=Cytochrome b; AltName: Full=Complex III subunit 3; AltName: Full=Complex III subunit III; AltName: Full=Cytochrome b-c1 complex subunit 3; AltName: Full=Ubiquinol-cytochrome-c reductase complex cytochrome b subunit	hgl:10201221	K00412	CYTB, petB	ubiquinol-cytochrome c reductase cytochrome b subunit	ko00190|ko02020|ko04260	Oxidative phosphorylation|Two-component system|Cardiac muscle contraction	--	--	--	--	--	C	COG1290	Component of the ubiquinol-cytochrome c reductase complex (complex III or cytochrome b-c1 complex), which is a respiratory chain that generates an electrochemical potential coupled to ATP synthesis (By similarity)	Cellular Component: mitochondrial inner membrane (GO:0005743);|Biological Process: mitochondrial electron transport, ubiquinol to cytochrome c (GO:0006122);|Molecular Function: ubiquinol-cytochrome-c reductase activity (GO:0008121);|Molecular Function: electron transfer activity (GO:0009055);|Cellular Component: respiratory chain complex III (GO:0045275);|Molecular Function: metal ion binding (GO…	--	--
i0_HQ_sampled12fd9_c286516_f8p0_300	--	--	--	--	--	--	--	--	--	--	--	--	--	--	--	--	--	--	--	--	--
i0_HQ_sampled12fd9_c286525_f2p0_233	--	--	--	--	--	--	--	--	--	--	--	--	--	--	--	--	--	--	--	--	--
i0_HQ_sampled12fd9_c286530_f6p0_540	gi|939673399|ref|XP_014283033.1|	PREDICTED: 60S ribosomal protein L26-like [Halyomorpha halys]	P47832.1	RecName: Full=60S ribosomal protein L26	tca:660748	K02898	RP-L26e, RPL26	large subunit ribosomal protein L26e	ko03010	Ribosome	--	--	--	--	--	J	COG0198	One of the proteins that surrounds the polypeptide exit tunnel on the outside of the subunit (By similarity)	--	--	--
i0_HQ_sampled12fd9_c286540_f3p0_628	gi|385100000|ref|YP_006234443.1|	COX1 gene product (mitochondrion) [Gammarus duebeni]	P34838.1	RecName: Full=Cytochrome c oxidase subunit 1; AltName: Full=Cytochrome c oxidase polypeptide I	aga:COX1	K02256	COX1	cytochrome c oxidase subunit 1	ko00190|ko04260	Oxidative phosphorylation|Cardiac muscle contraction	--	--	--	--	--	C	COG0843	Cytochrome C oxidase subunit I	Molecular Function: cytochrome-c oxidase activity (GO:0004129);|Molecular Function: iron ion binding (GO:0005506);|Cellular Component: mitochondrial inner membrane (GO:0005743);|Biological Process: oxidative phosphorylation (GO:0006119);|Biological Process: aerobic respiration (GO:0009060);|Cellular Component: integral component of membrane (GO:0016021);|Molecular Function: heme binding (GO:00200…	--	--
i0_HQ_sampled12fd9_c286542_f11p0_730	--	--	--	--	--	--	--	--	--	--	--	--	--	--	--	--	--	--	--	--	--
i0_HQ_sampled12fd9_c286562_f2p0_301	--	--	--	--	--	--	--	--	--	--	--	--	--	--	--	--	--	--	--	--	--
i0_HQ_sampled12fd9_c286566_f2p0_254	--	--	--	--	--	--	--	--	--	--	--	--	--	--	--	--	--	--	--	--	--
i0_HQ_sampled12fd9_c286567_f28p0_618	gi|926620733|ref|XP_013775675.1|	PREDICTED: small nuclear ribonucleoprotein Sm D2 [Limulus polyphemus]	Q9VI10.1	RecName: Full=Probable small nuclear ribonucleoprotein Sm D2; Short=Sm-D2; AltName: Full=snRNP core protein D2	nvi:100118225	K11096	SNRPD2, SMD2	small nuclear ribonucleoprotein D2	ko03040	Spliceosome	--	--	--	--	--	K	COG1958	small nuclear ribonucleoprotein	--	--	--
i0_HQ_sampled12fd9_c286579_f5p0_490	gi|70909775|emb|CAJ17313.1|	ribosomal protein L23Ae [Georissus sp. APV-2005]	P62752.1	RecName: Full=60S ribosomal protein L23a	tca:661617	K02893	RP-L23Ae, RPL23A	large subunit ribosomal protein L23Ae	ko03010	Ribosome	--	--	--	--	--	J	COG0089	One of the early assembly proteins it binds 23S rRNA. One of the proteins that surrounds the polypeptide exit tunnel on the outside of the ribosome. Forms the main docking site for trigger factor binding to the ribosome (By similarity)	Cellular Component: intracellular (GO:0005622);	--	--
i0_HQ_sampled12fd9_c286582_f42p0_998	--	--	--	--	--	--	--	--	--	--	--	--	--	--	--	--	--	--	--	--	--
i0_HQ_sampled12fd9_c286585_f49p0_848	gi|193878325|gb|ACF25907.1|	crustin-1 [Eriocheir sinensis]	--	--	--	--	--	--	--	--	--	--	--	--	--	--	--	--	--	--	--
i0_HQ_sampled12fd9_c286587_f4p0_940	--	--	--	--	--	--	--	--	--	--	--	--	--	--	--	--	--	--	--	--	--
i0_HQ_sampled12fd9_c286591_f6p0_353	--	--	--	--	--	--	--	--	--	--	--	--	--	--	--	--	--	--	--	--	--
i0_HQ_sampled12fd9_c286592_f4p0_348	--	--	--	--	--	--	--	--	--	--	--	--	--	--	--	--	--	--	--	--	--
i0_HQ_sampled12fd9_c286593_f5p0_755	gi|769859353|ref|XP_011641382.1|	PREDICTED: polyubiquitin-B [Pogonomyrmex barbatus]	P0CG71.1	RecName: Full=Polyubiquitin-A; Contains: RecName: Full=Ubiquitin; Contains: RecName: Full=Ubiquitin-related; Flags: Precursor	cfo:105255223	K08770	UBC	ubiquitin C	ko03320	PPAR signaling pathway	KOG0001	Ubiquitin and ubiquitin-like proteins	[OR]	CELLULAR PROCESSES AND SIGNALING|POORLY CHARACTERIZED	Posttranslational modification, protein turnover, chaperones |General function prediction only	O	COG5272	ubiquitin	--	--	--
i0_HQ_sampled12fd9_c286595_f3p0_450	--	--	--	--	--	--	--	--	--	--	--	--	--	--	--	--	--	--	--	--	--
i0_HQ_sampled12fd9_c286609_f11p0_901	gi|255653872|gb|ACU25384.1|	crustin 3 [Panulirus japonicus]	--	--	--	--	--	--	--	--	--	--	--	--	--	--	--	--	--	--	--
i0_HQ_sampled12fd9_c286613_f2p0_244	--	--	--	--	--	--	--	--	--	--	--	--	--	--	--	--	--	--	--	--	--
i0_HQ_sampled12fd9_c286615_f38p0_728	gi|700589136|gb|AIU94829.1|	60S ribosomal protein [Phragmatopoma lapidosa]	Q962T2.1	RecName: Full=60S ribosomal protein L28	crg:105332917	K02903	RP-L28e, RPL28	large subunit ribosomal protein L28e	ko03010	Ribosome	--	--	--	--	--	J	ENOG4111T32	protein complex subunit organization	--	--	--
i0_HQ_sampled12fd9_c286637_f48p0_529	gi|298162772|gb|ADI59750.1|	early cuticle protein 2 [Callinectes sapidus]	--	--	--	--	--	--	--	--	--	--	--	--	--	--	--	--	--	--	--
i0_HQ_sampled12fd9_c286638_f3p0_272	--	--	--	--	--	--	--	--	--	--	--	--	--	--	--	--	--	--	--	--	--
i0_HQ_sampled12fd9_c286648_f43p8_617	gi|512908093|ref|XP_004926598.1|	PREDICTED: cytochrome c oxidase subunit NDUFA4 [Bombyx mori]	Q6PBH5.1	RecName: Full=Cytochrome c oxidase subunit NDUFA4	bmor:101739922	K03948	NDUFA4	NADH dehydrogenase (ubiquinone) 1 alpha subcomplex subunit 4	ko00190	Oxidative phosphorylation	--	--	--	--	--	U	ENOG41124SW	NADH dehydrogenase (ubiquinone) 1 alpha subcomplex	Cellular Component: integral component of membrane (GO:0016021);	--	--
i0_HQ_sampled12fd9_c286650_f12p0_440	gi|926618291|ref|XP_013774346.1|	PREDICTED: NADH dehydrogenase [ubiquinone] 1 beta subcomplex subunit 2, mitochondrial-like [Limulus polyphemus]	Q0MQC7.1	RecName: Full=NADH dehydrogenase [ubiquinone] 1 beta subcomplex subunit 2, mitochondrial; AltName: Full=Complex I-AGGG; Short=CI-AGGG; AltName: Full=NADH-ubiquinone oxidoreductase AGGG subunit; Flags: Precursor	bmor:101740204	K03958	NDUFB2	NADH dehydrogenase (ubiquinone) 1 beta subcomplex subunit 2	ko00190	Oxidative phosphorylation	--	--	--	--	--	I	ENOG41128HF	NADH dehydrogenase (Ubiquinone) 1 beta subcomplex, 2, 8kDa	--	--	--
i0_HQ_sampled12fd9_c286656_f3p0_311	--	--	--	--	--	--	--	--	--	--	--	--	--	--	--	--	--	--	--	--	--
i0_HQ_sampled12fd9_c286658_f62p0_822	--	--	--	--	--	--	--	--	--	--	--	--	--	--	--	--	--	--	--	--	--
i0_HQ_sampled12fd9_c286663_f4p0_485	--	--	--	--	--	--	--	--	--	--	--	--	--	--	--	--	--	--	--	--	--
i0_HQ_sampled12fd9_c286664_f15p0_970	--	--	--	--	--	--	--	--	--	--	--	--	--	--	--	--	--	--	--	--	--
i0_HQ_sampled12fd9_c286665_f6p0_321	--	--	--	--	--	--	--	--	--	--	--	--	--	--	--	--	--	--	--	--	--
i0_HQ_sampled12fd9_c286672_f3p0_366	--	--	--	--	--	--	--	--	--	--	--	--	--	--	--	--	--	--	--	--	--
i0_HQ_sampled12fd9_c286673_f3p0_255	--	--	--	--	--	--	--	--	--	--	--	--	--	--	--	--	--	--	--	--	--
i0_HQ_sampled12fd9_c286675_f5p0_275	--	--	--	--	--	--	--	--	--	--	--	--	--	--	--	--	--	--	--	--	--
i0_HQ_sampled12fd9_c286681_f3p0_440	--	--	--	--	--	--	--	--	--	--	--	--	--	--	--	--	--	--	--	--	--
i0_HQ_sampled12fd9_c286684_f45p0_468	gi|632978245|ref|XP_007905801.1|	PREDICTED: protein transport protein Sec61 subunit gamma [Callorhinchus milii]	Q962X7.1	RecName: Full=Protein transport protein Sec61 subunit gamma	cmk:103187901	K07342	SEC61G, SSS1, secE	protein transport protein SEC61 subunit gamma and related proteins	ko04145|ko04141|ko03060	Phagosome|Protein processing in endoplasmic reticulum|Protein export	--	--	--	--	--	U	ENOG4111WJ7	protein transport protein sec61	Cellular Component: intracellular (GO:0005622);|Biological Process: protein targeting (GO:0006605);|Molecular Function: P-P-bond-hydrolysis-driven protein transmembrane transporter activity (GO:0015450);|Cellular Component: integral component of membrane (GO:0016021);|Biological Process: protein transmembrane transport (GO:0071806);	--	--
i0_HQ_sampled12fd9_c286693_f34p0_818	gi|942370405|gb|JAN67132.1|	Actin, alpha skeletal muscle [Daphnia magna]	P49128.2	RecName: Full=Actin-1; Flags: Precursor	rro:104675775	K05692	ACTB_G1	actin beta/gamma 1	ko04145|ko04520|ko04670|ko04015|ko04390|ko04611|ko04391|ko04510|ko04745|ko04810|ko04530|ko04919|ko04210|ko04921	Phagosome|Adherens junction|Leukocyte transendothelial migration|Rap1 signaling pathway|Hippo signaling pathway|Platelet activation|Hippo signaling pathway - fly|Focal adhesion|Phototransduction - fly|Regulation of actin cytoskeleton|Tight junction|Thyroid hormone signaling pathway|Apoptosis|Oxytocin signaling pathway	KOG0676	Actin and related proteins	[Z]	CELLULAR PROCESSES AND SIGNALING	Cytoskeleton	Z	COG5277	Actin-related protein	Cellular Component: integral component of membrane (GO:0016021);	--	--
i0_HQ_sampled12fd9_c286694_f69p0_335	gi|469664513|gb|AGH70211.1|	40S ribosomal protein S28 [Placozoa sp. H4]	Q90YP3.1	RecName: Full=40S ribosomal protein S28	xtr:549704	K02979	RP-S28e, RPS28	small subunit ribosomal protein S28e	ko03010	Ribosome	--	--	--	--	--	J	COG2053	Ribosomal protein	Molecular Function: structural constituent of ribosome (GO:0003735);|Cellular Component: ribosome (GO:0005840);|Biological Process: translation (GO:0006412);	--	--
i0_HQ_sampled12fd9_c286697_f25p0_926	gi|155966141|gb|ABU41025.1|	putative cuticle protein [Lepeophtheirus salmonis]	--	--	--	--	--	--	--	--	--	--	--	--	--	S	ENOG4111Y42	Cuticular protein	--	--	--
i0_HQ_sampled12fd9_c286703_f3p0_687	--	--	--	--	--	--	--	--	--	--	--	--	--	--	--	--	--	--	--	--	--
i0_HQ_sampled12fd9_c286704_f3p0_327	--	--	--	--	--	--	--	--	--	--	--	--	--	--	--	--	--	--	--	--	--
i0_HQ_sampled12fd9_c286705_f19p0_954	--	--	--	--	--	--	--	--	--	--	--	--	--	--	--	--	--	--	--	--	--
i0_HQ_sampled12fd9_c286706_f4p0_258	--	--	--	--	--	--	--	--	--	--	--	--	--	--	--	--	--	--	--	--	--
i0_HQ_sampled12fd9_c286711_f14p0_601	--	--	--	--	--	--	--	--	--	--	--	--	--	--	--	--	--	--	--	--	--
i0_HQ_sampled12fd9_c286724_f4p0_810	gi|943960918|ref|XP_014362976.1|	PREDICTED: uncharacterized protein LOC106714440 isoform X1 [Papilio machaon]	--	--	--	--	--	--	--	--	--	--	--	--	--	S	ENOG4110X3U	CLECT	--	--	--
i0_HQ_sampled12fd9_c286728_f33p0_607	--	--	--	--	--	--	--	--	--	--	--	--	--	--	--	--	--	--	--	--	--
i0_HQ_sampled12fd9_c286758_f5p0_400	--	--	--	--	--	--	--	--	--	--	--	--	--	--	--	--	--	--	--	--	--
i0_HQ_sampled12fd9_c286765_f3p24_946	gi|452056154|gb|AGF92153.1|	crustin-like protein [Macrobrachium rosenbergii]	--	--	--	--	--	--	--	--	--	--	--	--	--	--	--	--	Cellular Component: extracellular region (GO:0005576);|Biological Process: negative regulation of peptidase activity (GO:0010466);|Molecular Function: peptidase inhibitor activity (GO:0030414);	--	--
i0_HQ_sampled12fd9_c286768_f5p0_413	--	--	--	--	--	--	--	--	--	--	--	--	--	--	--	--	--	--	--	--	--
i0_HQ_sampled12fd9_c286769_f4p10_645	--	--	--	--	--	--	--	--	--	--	--	--	--	--	--	--	--	--	--	--	--
i0_HQ_sampled12fd9_c286784_f48p0_909	--	--	--	--	--	--	--	--	--	--	--	--	--	--	--	--	--	--	--	--	--
i0_HQ_sampled12fd9_c286787_f2p0_636	--	--	--	--	--	--	--	--	--	--	--	--	--	--	--	--	--	--	--	--	--
i0_HQ_sampled12fd9_c286789_f2p0_256	--	--	--	--	--	--	--	--	--	--	--	--	--	--	--	--	--	--	--	--	--
i0_HQ_sampled12fd9_c286811_f12p0_629	--	--	--	--	--	--	--	--	--	--	--	--	--	--	--	--	--	--	--	--	--
i0_HQ_sampled12fd9_c286814_f15p0_962	gi|646705833|gb|KDR13343.1|	Pro-resilin [Zootermopsis nevadensis]	Q9V7U0.1	RecName: Full=Pro-resilin; Flags: Precursor	--	--	--	--	--	--	--	--	--	--	--	S	ENOG41120ID	Insect cuticle protein	--	--	--
i0_HQ_sampled12fd9_c286819_f18p0_908	--	--	--	--	--	--	--	--	--	--	--	--	--	--	--	--	--	--	--	--	--
i0_HQ_sampled12fd9_c286821_f7p0_715	--	--	--	--	--	--	--	--	--	--	--	--	--	--	--	--	--	--	--	--	--
i0_HQ_sampled12fd9_c286822_f13p0_677	--	--	--	--	--	--	--	--	--	--	--	--	--	--	--	--	--	--	--	--	--
i0_HQ_sampled12fd9_c286828_f14p0_274	gi|403333060|gb|EJY65597.1|	hypothetical protein OXYTRI_14248 [Oxytricha trifallax]	Q8TGM6.1	RecName: Full=Protein TAR1; AltName: Full=Transcript antisense to ribosomal RNA protein 1	--	--	--	--	--	--	--	--	--	--	--	S	ENOG410Y5UK	NA	--	--	--
i0_HQ_sampled12fd9_c286835_f8p0_793	gi|241686452|ref|XP_002412826.1|	ribosomal protein L20, putative [Ixodes scapularis]	--	--	isc:IscW_ISCW012003	K02887	RP-L20, MRPL20, rplT	large subunit ribosomal protein L20	ko03010	Ribosome	--	--	--	--	--	J	COG0292	Binds directly to 23S ribosomal RNA and is necessary for the in vitro assembly process of the 50S ribosomal subunit. It is not involved in the protein synthesizing functions of that subunit (By similarity)	--	--	--
i0_HQ_sampled12fd9_c286837_f4p0_950	gi|646708450|gb|KDR14762.1|	60S acidic ribosomal protein P0 [Zootermopsis nevadensis]	P19889.1	RecName: Full=60S acidic ribosomal protein P0; AltName: Full=Apurinic-apyrimidinic endonuclease; AltName: Full=DNA-(apurinic or apyrimidinic site) lyase	dsi:Dsimw501_GD15019	K02941	RP-LP0, RPLP0	large subunit ribosomal protein LP0	ko03010	Ribosome	KOG0815	60S acidic ribosomal protein P0	[J]	INFORMATION STORAGE AND PROCESSING	Translation, ribosomal structure and biogenesis	J	COG0244	50s ribosomal protein L10	Cellular Component: ribosome (GO:0005840);|Biological Process: ribosome biogenesis (GO:0042254);	--	--
i0_HQ_sampled12fd9_c286849_f6p0_436	--	--	--	--	--	--	--	--	--	--	--	--	--	--	--	--	--	--	--	--	--
i0_HQ_sampled12fd9_c286850_f14p0_345	--	--	--	--	--	--	--	--	--	--	--	--	--	--	--	--	--	--	--	--	--
i0_HQ_sampled12fd9_c286851_f22p0_490	--	--	--	--	--	--	--	--	--	--	--	--	--	--	--	--	--	--	--	--	--
i0_HQ_sampled12fd9_c286855_f5p0_365	--	--	--	--	--	--	--	--	--	--	--	--	--	--	--	--	--	--	--	--	--
i0_HQ_sampled12fd9_c286858_f6p0_394	--	--	--	--	--	--	--	--	--	--	--	--	--	--	--	--	--	--	--	--	--
i0_HQ_sampled12fd9_c286868_f26p0_305	gi|62484806|emb|CAI78901.1|	hemocyanin subunit 1 [Gammarus roeselii]	P04254.2	RecName: Full=Hemocyanin A chain	--	--	--	--	--	--	--	--	--	--	--	--	--	--	Molecular Function: oxidoreductase activity (GO:0016491);|Molecular Function: metal ion binding (GO:0046872);|Biological Process: oxidation-reduction process (GO:0055114);	--	--
i0_HQ_sampled12fd9_c286873_f50p0_1000	--	--	--	--	--	--	--	--	--	--	--	--	--	--	--	--	--	--	--	--	--
i0_HQ_sampled12fd9_c286884_f41p0_509	gi|194750719|ref|XP_001957677.1|	uncharacterized protein Dana_GF10534, isoform A [Drosophila ananassae]	Q9CQ69.3	RecName: Full=Cytochrome b-c1 complex subunit 8; AltName: Full=Complex III subunit 8; AltName: Full=Complex III subunit VIII; AltName: Full=Ubiquinol-cytochrome c reductase complex 9.5 kDa protein; AltName: Full=Ubiquinol-cytochrome c reductase complex ubiquinone-binding protein QP-C	dan:Dana_GF10534	K00418	QCR8, UQCRQ	ubiquinol-cytochrome c reductase subunit 8	ko00190|ko04260	Oxidative phosphorylation|Cardiac muscle contraction	--	--	--	--	--	I	ENOG41123BH	Ubiquinol-cytochrome c reductase complex	--	--	--
i0_HQ_sampled12fd9_c286888_f10p0_863	gi|62484806|emb|CAI78901.1|	hemocyanin subunit 1 [Gammarus roeselii]	P04254.2	RecName: Full=Hemocyanin A chain	--	--	--	--	--	--	--	--	--	--	--	S	ENOG4111KTW	prophenoloxidase	Molecular Function: oxidoreductase activity (GO:0016491);|Molecular Function: metal ion binding (GO:0046872);|Biological Process: oxidation-reduction process (GO:0055114);	--	--
i0_HQ_sampled12fd9_c286898_f36p0_994	gi|817072391|ref|XP_012258295.1|	PREDICTED: tubulin alpha-1 chain-like [Athalia rosae]	Q94572.1	RecName: Full=Tubulin alpha-3 chain; AltName: Full=Alpha-III tubulin	api:100169457	K07374	TUBA	tubulin alpha	ko04540|ko04210|ko04145	Gap junction|Apoptosis|Phagosome	--	--	--	--	--	Z	COG5023	protein polymerization	--	--	--
i0_HQ_sampled12fd9_c286902_f29p0_699	--	--	--	--	--	--	--	--	--	--	--	--	--	--	--	--	--	--	--	--	--
i0_HQ_sampled12fd9_c286904_f19p0_982	gi|636630005|gb|AIA09031.1|	elongation factor 1-alpha, partial [Gammarus lacustris]	Q9YIC0.1	RecName: Full=Elongation factor 1-alpha; Short=EF-1-alpha	wse:WALSEDRAFT_66438	K03231	EEF1A	elongation factor 1-alpha	ko03013	RNA transport	KOG0052	Translation elongation factor EF-1 alpha/Tu	[J]	INFORMATION STORAGE AND PROCESSING	Translation, ribosomal structure and biogenesis	J	COG5256	This protein promotes the GTP-dependent binding of aminoacyl-tRNA to the A-site of ribosomes during protein biosynthesis (By similarity)	Molecular Function: translation elongation factor activity (GO:0003746);|Molecular Function: GTPase activity (GO:0003924);|Molecular Function: GTP binding (GO:0005525);|Cellular Component: cytoplasm (GO:0005737);|Biological Process: translational elongation (GO:0006414);	--	--
i0_HQ_sampled12fd9_c286905_f3p0_545	--	--	--	--	--	--	--	--	--	--	--	--	--	--	--	--	--	--	--	--	--
i0_HQ_sampled12fd9_c286907_f2p0_549	--	--	--	--	--	--	--	--	--	--	--	--	--	--	--	--	--	--	--	--	--
i0_HQ_sampled12fd9_c286912_f31p0_806	--	--	--	--	--	--	--	--	--	--	--	--	--	--	--	--	--	--	--	--	--
i0_HQ_sampled12fd9_c286918_f4p0_420	--	--	--	--	--	--	--	--	--	--	--	--	--	--	--	--	--	--	--	--	--
i0_HQ_sampled12fd9_c286919_f2p0_500	gi|238683649|gb|ACR54103.1|	ATP synthase subunit g [Palaemon varians]	Q5RFH0.1	RecName: Full=ATP synthase subunit g, mitochondrial; Short=ATPase subunit g	dwi:Dwil_GK15246	K02140	ATPeFG, ATP5L, ATP20	F-type H+-transporting ATPase subunit g	ko00190	Oxidative phosphorylation	--	--	--	--	--	I	ENOG4111TZ1	Mitochondrial membrane ATP synthase (F(1)F(0) ATP synthase or Complex V) produces ATP from ADP in the presence of a proton gradient across the membrane which is generated by electron transport complexes of the respiratory chain. F-type ATPases consist of two structural domains, F(1) - containing the extramembraneous catalytic core, and F(0) - containing the membrane proton channel, linked togethe…	--	--	--
i0_HQ_sampled12fd9_c286935_f34p0_376	--	--	--	--	--	--	--	--	--	--	--	--	--	--	--	--	--	--	--	--	--
i0_HQ_sampled12fd9_c286937_f61p2_814	gi|397881230|gb|AFO68120.1|	crustin [Macrobrachium rosenbergii]	--	--	--	--	--	--	--	--	--	--	--	--	--	--	--	--	--	--	--
i0_HQ_sampled12fd9_c286939_f60p0_970	--	--	--	--	--	--	--	--	--	--	--	--	--	--	--	--	--	--	--	--	--
i0_HQ_sampled12fd9_c286941_f48p0_495	gi|190702313|gb|ACE75209.1|	cytochrome c oxidase-like protein [Glyptapanteles flavicoxis]	Q53CF9.1	RecName: Full=Cytochrome c oxidase subunit 7C, mitochondrial; AltName: Full=Cytochrome c oxidase polypeptide VIIc; Flags: Precursor	--	--	--	--	--	--	--	--	--	--	--	O	ENOG4112B97	cytochrome C oxidase (Subunit	--	--	--
i0_HQ_sampled12fd9_c286949_f25p0_544	gi|121484216|gb|ABM54465.1|	cuticle protein CB6 [Portunus pelagicus]	Q9V7U0.1	RecName: Full=Pro-resilin; Flags: Precursor	--	--	--	--	--	--	--	--	--	--	--	--	--	--	--	--	--
i0_HQ_sampled12fd9_c286953_f5p0_363	--	--	--	--	--	--	--	--	--	--	--	--	--	--	--	--	--	--	--	--	--
i0_HQ_sampled12fd9_c286962_f29p15_414	gi|682331622|gb|AIN36963.1|	M15 protein [Cherax quadricarinatus]	--	--	--	--	--	--	--	--	--	--	--	--	--	--	--	--	Molecular Function: structural constituent of cuticle (GO:0042302);	--	--
i0_HQ_sampled12fd9_c286966_f9p0_365	--	--	--	--	--	--	--	--	--	--	--	--	--	--	--	--	--	--	--	--	--
i0_HQ_sampled12fd9_c286968_f7p0_251	--	--	--	--	--	--	--	--	--	--	--	--	--	--	--	--	--	--	--	--	--
i0_HQ_sampled12fd9_c286974_f3p0_561	gi|52345832|ref|NP_001004964.1|	glutathione S-transferase mu 1 [Xenopus tropicalis]	P30112.3	RecName: Full=Glutathione S-transferase class-mu 26 kDa isozyme 51; Short=GST51; AltName: Full=Fh51	xtr:448387	K00799	GST, gst	glutathione S-transferase	ko00982|ko00480|ko00980	Drug metabolism - cytochrome P450|Glutathione metabolism|Metabolism of xenobiotics by cytochrome P450	--	--	--	--	--	O	ENOG4110YU0	Glutathione S-transferase, mu	--	--	--
i0_HQ_sampled12fd9_c286975_f6p0_315	--	--	--	--	--	--	--	--	--	--	--	--	--	--	--	--	--	--	--	--	--
i0_HQ_sampled12fd9_c28697_f4p0_871	--	--	--	--	--	--	--	--	--	--	--	--	--	--	--	--	--	--	--	--	--
i0_HQ_sampled12fd9_c286984_f50p0_929	gi|155966141|gb|ABU41025.1|	putative cuticle protein [Lepeophtheirus salmonis]	--	--	--	--	--	--	--	--	--	--	--	--	--	S	ENOG4111Y42	Cuticular protein	--	--	--
i0_HQ_sampled12fd9_c286988_f39p0_933	--	--	--	--	--	--	--	--	--	--	--	--	--	--	--	--	--	--	--	--	--
i0_HQ_sampled12fd9_c286996_f28p0_724	--	--	--	--	--	--	--	--	--	--	--	--	--	--	--	--	--	--	--	--	--
i0_HQ_sampled12fd9_c286997_f22p0_474	--	--	--	--	--	--	--	--	--	--	--	--	--	--	--	--	--	--	--	--	--
i0_HQ_sampled12fd9_c287002_f3p0_472	gi|155966141|gb|ABU41025.1|	putative cuticle protein [Lepeophtheirus salmonis]	--	--	--	--	--	--	--	--	--	--	--	--	--	S	ENOG4111Y42	Cuticular protein	--	--	--
i0_HQ_sampled12fd9_c287005_f53p0_588	--	--	--	--	--	--	--	--	--	--	--	--	--	--	--	--	--	--	--	--	--
i0_HQ_sampled12fd9_c287006_f61p1_583	gi|854959449|gb|AKN79732.1|	ribosomal protein L27 [Procambarus clarkii]	Q7ZV82.3	RecName: Full=60S ribosomal protein L27	cin:100186399	K02901	RP-L27e, RPL27	large subunit ribosomal protein L27e	ko03010	Ribosome	--	--	--	--	--	J	COG2163	(ribosomal) protein	--	--	--
i0_HQ_sampled12fd9_c287008_f62p0_764	gi|220172371|gb|ACL79888.1|	putative elastin a, partial [Rimicaris exoculata]	--	--	--	--	--	--	--	--	--	--	--	--	--	--	--	--	--	--	--
i0_HQ_sampled12fd9_c287009_f29p0_749	gi|256002943|gb|ACU52718.1|	ribosomal protein L10a [Fenneropenaeus merguiensis]	Q963B6.1	RecName: Full=60S ribosomal protein L10a	tca:664459	K02865	RP-L10Ae, RPL10A	large subunit ribosomal protein L10Ae	ko03010	Ribosome	--	--	--	--	--	J	COG0081	Binds directly to 23S rRNA. The L1 stalk is quite mobile in the ribosome, and is involved in E site tRNA release (By similarity)	Molecular Function: RNA binding (GO:0003723);|Molecular Function: structural constituent of ribosome (GO:0003735);|Biological Process: translation (GO:0006412);|Cellular Component: large ribosomal subunit (GO:0015934);	--	--
i0_HQ_sampled12fd9_c287013_f56p0_988	--	--	--	--	--	--	--	--	--	--	--	--	--	--	--	--	--	--	--	--	--
i0_HQ_sampled12fd9_c287017_f25p0_805	gi|270037217|gb|ACZ58320.1|	elongation factor-1 alpha, partial [Cyamus gracilis]	O42820.1	RecName: Full=Elongation factor 1-alpha; Short=EF-1-alpha	wse:WALSEDRAFT_66438	K03231	EEF1A	elongation factor 1-alpha	ko03013	RNA transport	KOG0052	Translation elongation factor EF-1 alpha/Tu	[J]	INFORMATION STORAGE AND PROCESSING	Translation, ribosomal structure and biogenesis	J	COG5256	This protein promotes the GTP-dependent binding of aminoacyl-tRNA to the A-site of ribosomes during protein biosynthesis (By similarity)	Molecular Function: translation elongation factor activity (GO:0003746);|Molecular Function: GTPase activity (GO:0003924);|Molecular Function: GTP binding (GO:0005525);|Cellular Component: cytoplasm (GO:0005737);|Biological Process: translational elongation (GO:0006414);	--	--
i0_HQ_sampled12fd9_c287019_f9p0_795	gi|926630158|ref|XP_013780757.1|	PREDICTED: glutathione S-transferase Mu 1-like [Limulus polyphemus]	P10649.2	RecName: Full=Glutathione S-transferase Mu 1; AltName: Full=GST 1-1; AltName: Full=GST class-mu 1; AltName: Full=Glutathione S-transferase GT8.7; AltName: Full=pmGT10	bfo:BRAFLDRAFT_72748	K00799	GST, gst	glutathione S-transferase	ko00982|ko00480|ko00980	Drug metabolism - cytochrome P450|Glutathione metabolism|Metabolism of xenobiotics by cytochrome P450	--	--	--	--	--	O	ENOG4110YU0	Glutathione S-transferase, mu	--	--	--
i0_HQ_sampled12fd9_c287027_f50p0_565	gi|573891692|ref|XP_006633603.1|	PREDICTED: 40S ribosomal protein S16 [Lepisosteus oculatus]	P62249.2	RecName: Full=40S ribosomal protein S16; AltName: Full=Small ribosomal subunit protein uS9	phi:102108131	K02960	RP-S16e, RPS16	small subunit ribosomal protein S16e	ko03010	Ribosome	--	--	--	--	--	J	COG0103	30S ribosomal protein S9	--	--	--
i0_HQ_sampled12fd9_c287029_f7p0_516	--	--	--	--	--	--	--	--	--	--	--	--	--	--	--	--	--	--	--	--	--
i0_HQ_sampled12fd9_c287030_f23p0_314	--	--	--	--	--	--	--	--	--	--	--	--	--	--	--	--	--	--	--	--	--
i0_HQ_sampled12fd9_c287036_f4p0_265	--	--	--	--	--	--	--	--	--	--	--	--	--	--	--	--	--	--	--	--	--
i0_HQ_sampled12fd9_c287039_f18p0_451	--	--	--	--	--	--	--	--	--	--	--	--	--	--	--	--	--	--	--	PF01391.17	Collagen triple helix repeat (20 copies)
i0_HQ_sampled12fd9_c287044_f33p0_479	--	--	--	--	--	--	--	--	--	--	--	--	--	--	--	--	--	--	--	--	--
i0_HQ_sampled12fd9_c287046_f62p0_617	gi|512911411|ref|XP_004927405.1|	PREDICTED: cytochrome c oxidase subunit 6B1 isoform X2 [Bombyx mori]	O94581.2	RecName: Full=Cytochrome c oxidase subunit 6B; AltName: Full=Cytochrome c oxidase polypeptide VIb	sko:102805462	K02267	COX6B	cytochrome c oxidase subunit 6b	ko00190|ko04260	Oxidative phosphorylation|Cardiac muscle contraction	--	--	--	--	--	O	ENOG41121WM	cytochrome C oxidase	--	--	--
i0_HQ_sampled12fd9_c287059_f5p0_462	gi|541042565|gb|ERG81670.1|	40s ribosomal protein s26 [Ascaris suum]	P61251.3	RecName: Full=40S ribosomal protein S26	loa:LOAG_00472	K02976	RP-S26e, RPS26	small subunit ribosomal protein S26e	ko03010	Ribosome	--	--	--	--	--	J	COG4830	Ribosomal protein	Molecular Function: structural constituent of ribosome (GO:0003735);|Cellular Component: ribosome (GO:0005840);|Biological Process: translation (GO:0006412);	--	--
i0_HQ_sampled12fd9_c287063_f7p0_582	--	--	--	--	--	--	--	--	--	--	--	--	--	--	--	--	--	--	--	--	--
i0_HQ_sampled12fd9_c287077_f36p0_357	gi|121484216|gb|ABM54465.1|	cuticle protein CB6 [Portunus pelagicus]	Q9V7U0.1	RecName: Full=Pro-resilin; Flags: Precursor	--	--	--	--	--	--	--	--	--	--	--	--	--	--	--	--	--
i0_HQ_sampled12fd9_c287099_f29p0_368	--	--	--	--	--	--	--	--	--	--	--	--	--	--	--	--	--	--	--	--	--
i0_HQ_sampled12fd9_c287100_f16p0_563	--	--	--	--	--	--	--	--	--	--	--	--	--	--	--	--	--	--	--	--	--
i0_HQ_sampled12fd9_c287102_f25p0_363	--	--	--	--	--	--	--	--	--	--	--	--	--	--	--	--	--	--	--	--	--
i0_HQ_sampled12fd9_c287105_f66p0_609	gi|755956906|ref|XP_011303587.1|	PREDICTED: 40S ribosomal protein S10 [Fopius arisanus]	Q9VWG3.2	RecName: Full=40S ribosomal protein S10b	aag:AaeL_AAEL002047	K02947	RP-S10e, RPS10	small subunit ribosomal protein S10e	ko03010	Ribosome	--	--	--	--	--	J	COG5045	Ribosomal protein	--	--	--
i0_HQ_sampled12fd9_c287109_f5p0_381	--	--	--	--	--	--	--	--	--	--	--	--	--	--	--	--	--	--	--	--	--
i0_HQ_sampled12fd9_c287110_f24p0_450	--	--	--	--	--	--	--	--	--	--	--	--	--	--	--	--	--	--	--	--	--
i0_HQ_sampled12fd9_c287116_f41p0_677	--	--	--	--	--	--	--	--	--	--	--	--	--	--	--	--	--	--	--	--	--
i0_HQ_sampled12fd9_c287123_f131p0_791	--	--	--	--	--	--	--	--	--	--	--	--	--	--	--	--	--	--	--	--	--
i0_HQ_sampled12fd9_c287126_f22p0_712	--	--	--	--	--	--	--	--	--	--	--	--	--	--	--	--	--	--	--	--	--
i0_HQ_sampled12fd9_c287161_f5p0_935	--	--	--	--	--	--	--	--	--	--	--	--	--	--	--	--	--	--	--	PF01391.17	Collagen triple helix repeat (20 copies)
i0_HQ_sampled12fd9_c287170_f5p0_558	--	--	--	--	--	--	--	--	--	--	--	--	--	--	--	--	--	--	--	--	--
i0_HQ_sampled12fd9_c287172_f4p0_675	gi|646713059|gb|KDR17560.1|	ATP synthase subunit d, mitochondrial [Zootermopsis nevadensis]	Q24251.2	RecName: Full=ATP synthase subunit d, mitochondrial; Short=ATPase subunit d	soc:105193662	K02138	ATPeF0D, ATP5H, ATP7	F-type H+-transporting ATPase subunit d	ko00190	Oxidative phosphorylation	--	--	--	--	--	S	ENOG4111IHJ	energy coupled proton transport, down electrochemical gradient	Cellular Component: mitochondrial proton-transporting ATP synthase complex, coupling factor F(o) (GO:0000276);|Molecular Function: hydrogen ion transmembrane transporter activity (GO:0015078);|Biological Process: ATP synthesis coupled proton transport (GO:0015986);	--	--
i0_HQ_sampled12fd9_c287225_f7p0_800	gi|768954790|ref|XP_011616108.1|	PREDICTED: tubulin alpha chain, partial [Takifugu rubripes]	P30436.2	RecName: Full=Tubulin alpha chain; Contains: RecName: Full=Detyrosinated tubulin alpha chain	tru:101064438	K07374	TUBA	tubulin alpha	ko04540|ko04210|ko04145	Gap junction|Apoptosis|Phagosome	--	--	--	--	--	Z	COG5023	protein polymerization	--	--	--
i0_HQ_sampled12fd9_c287276_f4p0_999	--	--	--	--	--	--	--	--	--	--	--	--	--	--	--	--	--	--	--	--	--
i0_HQ_sampled12fd9_c287294_f44p0_692	--	--	--	--	--	--	--	--	--	--	--	--	--	--	--	--	--	--	--	--	--
i0_HQ_sampled12fd9_c287374_f3p0_517	gi|668465299|gb|KFB52458.1|	AGAP008952-PA-like protein [Anopheles sinensis]	--	--	--	--	--	--	--	--	--	--	--	--	--	JO	COG5193	La ribonucleoprotein domain family member	--	--	--
i0_HQ_sampled12fd9_c287382_f2p0_546	gi|913332029|ref|XP_013197618.1|	PREDICTED: dolichyl-diphosphooligosaccharide--protein glycosyltransferase 48 kDa subunit [Amyelois transitella]	P39656.4	RecName: Full=Dolichyl-diphosphooligosaccharide--protein glycosyltransferase 48 kDa subunit; Short=DDOST 48 kDa subunit; Short=Oligosaccharyl transferase 48 kDa subunit; Flags: Precursor	pxy:105391032	K12670	WBP1	oligosaccharyltransferase complex subunit beta	ko04141|ko00510|ko00513	Protein processing in endoplasmic reticulum|N-Glycan biosynthesis|Various types of N-glycan biosynthesis	--	--	--	--	--	S	ENOG410XSF3	Dolichyl-diphosphooligosaccharide--protein glycosyltransferase	--	--	--
i0_HQ_sampled12fd9_c287386_f29p0_629	--	--	--	--	--	--	--	--	--	--	--	--	--	--	--	--	--	--	--	--	--
i0_HQ_sampled12fd9_c287398_f15p0_494	--	--	--	--	--	--	--	--	--	--	--	--	--	--	--	--	--	--	--	--	--
i0_HQ_sampled12fd9_c287417_f55p0_268	--	--	--	--	--	--	--	--	--	--	--	--	--	--	--	--	--	--	--	--	--
i0_HQ_sampled12fd9_c287427_f16p0_274	--	--	--	--	--	--	--	--	--	--	--	--	--	--	--	--	--	--	--	--	--
i0_HQ_sampled12fd9_c287438_f13p0_779	gi|3907620|gb|AAC78681.1|	actin 1 [Penaeus monodon]	P53501.1	RecName: Full=Actin-57B; Flags: Precursor	rro:104675775	K05692	ACTB_G1	actin beta/gamma 1	ko04145|ko04520|ko04670|ko04015|ko04390|ko04611|ko04391|ko04510|ko04745|ko04810|ko04530|ko04919|ko04210|ko04921	Phagosome|Adherens junction|Leukocyte transendothelial migration|Rap1 signaling pathway|Hippo signaling pathway|Platelet activation|Hippo signaling pathway - fly|Focal adhesion|Phototransduction - fly|Regulation of actin cytoskeleton|Tight junction|Thyroid hormone signaling pathway|Apoptosis|Oxytocin signaling pathway	KOG0676	Actin and related proteins	[Z]	CELLULAR PROCESSES AND SIGNALING	Cytoskeleton	Z	COG5277	Actin-related protein	Molecular Function: ATP binding (GO:0005524);	--	--
i0_HQ_sampled12fd9_c287467_f4p0_394	--	--	--	--	--	--	--	--	--	--	--	--	--	--	--	--	--	--	--	--	--
i0_HQ_sampled12fd9_c287473_f8p0_438	--	--	--	--	--	--	--	--	--	--	--	--	--	--	--	--	--	--	--	--	--
i0_HQ_sampled12fd9_c287482_f15p0_349	--	--	--	--	--	--	--	--	--	--	--	--	--	--	--	--	--	--	--	--	--
i0_HQ_sampled12fd9_c287484_f2p0_660	--	--	--	--	--	--	--	--	--	--	--	--	--	--	--	--	--	--	--	--	--
i0_HQ_sampled12fd9_c287488_f5p0_616	--	--	--	--	--	--	--	--	--	--	--	--	--	--	--	--	--	--	--	--	--
i0_HQ_sampled12fd9_c287493_f21p0_405	--	--	--	--	--	--	--	--	--	--	--	--	--	--	--	--	--	--	--	--	--
i0_HQ_sampled12fd9_c287595_f51p0_715	--	--	--	--	--	--	--	--	--	--	--	--	--	--	--	--	--	--	--	--	--
i0_HQ_sampled12fd9_c287665_f2p0_542	gi|207298827|gb|ACI23565.1|	skeletal muscle actin 2 [Homarus americanus]	O16808.1	RecName: Full=Actin; Flags: Precursor	rro:104675775	K05692	ACTB_G1	actin beta/gamma 1	ko04145|ko04520|ko04670|ko04015|ko04390|ko04611|ko04391|ko04510|ko04745|ko04810|ko04530|ko04919|ko04210|ko04921	Phagosome|Adherens junction|Leukocyte transendothelial migration|Rap1 signaling pathway|Hippo signaling pathway|Platelet activation|Hippo signaling pathway - fly|Focal adhesion|Phototransduction - fly|Regulation of actin cytoskeleton|Tight junction|Thyroid hormone signaling pathway|Apoptosis|Oxytocin signaling pathway	KOG0676	Actin and related proteins	[Z]	CELLULAR PROCESSES AND SIGNALING	Cytoskeleton	Z	COG5277	Actin-related protein	Molecular Function: ATP binding (GO:0005524);	--	--
i0_HQ_sampled12fd9_c287701_f5p0_294	gi|207298835|gb|ACI23569.1|	skeletal muscle actin 6 [Homarus americanus]	P45521.1	RecName: Full=Actin	rro:104675775	K05692	ACTB_G1	actin beta/gamma 1	ko04145|ko04520|ko04670|ko04015|ko04390|ko04611|ko04391|ko04510|ko04745|ko04810|ko04530|ko04919|ko04210|ko04921	Phagosome|Adherens junction|Leukocyte transendothelial migration|Rap1 signaling pathway|Hippo signaling pathway|Platelet activation|Hippo signaling pathway - fly|Focal adhesion|Phototransduction - fly|Regulation of actin cytoskeleton|Tight junction|Thyroid hormone signaling pathway|Apoptosis|Oxytocin signaling pathway	KOG0676	Actin and related proteins	[Z]	CELLULAR PROCESSES AND SIGNALING	Cytoskeleton	Z	COG5277	Actin-related protein	--	--	--
i0_HQ_sampled12fd9_c287710_f3p0_390	--	--	--	--	--	--	--	--	--	--	--	--	--	--	--	--	--	--	--	--	--
i0_HQ_sampled12fd9_c287735_f3p0_716	--	--	--	--	--	--	--	--	--	--	--	--	--	--	--	--	--	--	--	--	--
i0_HQ_sampled12fd9_c287782_f4p0_754	gi|270037219|gb|ACZ58321.1|	elongation factor-1 alpha, partial [Cyamus gracilis]	O42820.1	RecName: Full=Elongation factor 1-alpha; Short=EF-1-alpha	wse:WALSEDRAFT_66192	K03231	EEF1A	elongation factor 1-alpha	ko03013	RNA transport	KOG0052	Translation elongation factor EF-1 alpha/Tu	[J]	INFORMATION STORAGE AND PROCESSING	Translation, ribosomal structure and biogenesis	J	COG5256	This protein promotes the GTP-dependent binding of aminoacyl-tRNA to the A-site of ribosomes during protein biosynthesis (By similarity)	Molecular Function: translation elongation factor activity (GO:0003746);|Molecular Function: GTPase activity (GO:0003924);|Molecular Function: GTP binding (GO:0005525);|Cellular Component: cytoplasm (GO:0005737);|Biological Process: translational elongation (GO:0006414);	--	--
i0_HQ_sampled12fd9_c287784_f5p0_677	gi|113204648|gb|ABI34072.1|	ATP/ADP translocase [Pacifastacus leniusculus]	O46373.3	RecName: Full=ADP/ATP translocase 1; AltName: Full=30 kDa calsequestrin-binding protein; Short=30 kDa CSQ-binding protein; AltName: Full=ADP,ATP carrier protein 1; AltName: Full=Adenine nucleotide translocator 1; Short=ANT 1; AltName: Full=Solute carrier family 25 member 4	spu:575225	K05863	SLC25A4S, ANT	solute carrier family 25 (mitochondrial adenine nucleotide translocator), member 4/5/6/31	ko04020|ko04022	Calcium signaling pathway|cGMP-PKG signaling pathway	KOG0749	Mitochondrial ADP/ATP carrier proteins	[C]	METABOLISM	Energy production and conversion	U	ENOG410XNW0	transmembrane transport	Molecular Function: transporter activity (GO:0005215);|Cellular Component: mitochondrial inner membrane (GO:0005743);|Cellular Component: integral component of membrane (GO:0016021);|Biological Process: transmembrane transport (GO:0055085);	--	--
i0_HQ_sampled12fd9_c287799_f5p0_364	--	--	--	--	--	--	--	--	--	--	--	--	--	--	--	--	--	--	--	--	--
i0_HQ_sampled12fd9_c287802_f4p0_784	--	--	--	--	--	--	--	--	--	--	--	--	--	--	--	--	--	--	--	--	--
i0_HQ_sampled12fd9_c287825_f3p0_996	--	--	--	--	--	--	--	--	--	--	--	--	--	--	--	--	--	--	--	--	--
i0_HQ_sampled12fd9_c28782_f3p0_604	gi|155966141|gb|ABU41025.1|	putative cuticle protein [Lepeophtheirus salmonis]	--	--	--	--	--	--	--	--	--	--	--	--	--	S	ENOG4111Y42	Cuticular protein	Cellular Component: extracellular region (GO:0005576);|Biological Process: chitin metabolic process (GO:0006030);|Molecular Function: chitin binding (GO:0008061);	--	--
i0_HQ_sampled12fd9_c287865_f6p0_293	--	--	--	--	--	--	--	--	--	--	--	--	--	--	--	--	--	--	--	--	--
i0_HQ_sampled12fd9_c287870_f3p0_425	gi|734562430|gb|KHN88363.1|	40S ribosomal protein S5 [Toxocara canis]	P46782.4	RecName: Full=40S ribosomal protein S5; AltName: Full=Small ribosomal subunit protein uS7; Contains: RecName: Full=40S ribosomal protein S5, N-terminally processed	shr:100915857	K02989	RP-S5e, RPS5	small subunit ribosomal protein S5e	ko03010	Ribosome	--	--	--	--	--	J	COG0049	One of the primary rRNA binding proteins, it binds directly to 16S rRNA where it nucleates assembly of the head domain of the 30S subunit. Is located at the subunit interface close to the decoding center, probably blocks exit of the E-site tRNA (By similarity)	Molecular Function: RNA binding (GO:0003723);|Molecular Function: structural constituent of ribosome (GO:0003735);|Biological Process: translation (GO:0006412);|Cellular Component: small ribosomal subunit (GO:0015935);	--	--
i0_HQ_sampled12fd9_c287875_f4p0_593	gi|805800100|ref|XP_012144316.1|	PREDICTED: transmembrane protease serine 9-like [Megachile rotundata]	Q8SQ23.1	RecName: Full=Tissue-type plasminogen activator; Short=t-PA; Short=t-plasminogen activator; Short=tPA; Contains: RecName: Full=Tissue-type plasminogen activator chain A; Contains: RecName: Full=Tissue-type plasminogen activator chain B; Flags: Precursor	--	--	--	--	--	--	--	--	--	--	--	O	COG5640	protease	--	--	--
i0_HQ_sampled12fd9_c287916_f2p0_760	--	--	--	--	--	--	--	--	--	--	--	--	--	--	--	--	--	--	--	--	--
i0_HQ_sampled12fd9_c287938_f2p0_582	--	--	--	--	--	--	--	--	--	--	--	--	--	--	--	--	--	--	--	--	--
i0_HQ_sampled12fd9_c287969_f4p0_390	--	--	--	--	--	--	--	--	--	--	--	--	--	--	--	--	--	--	--	--	--
i0_HQ_sampled12fd9_c287975_f5p0_752	--	--	--	--	--	--	--	--	--	--	--	--	--	--	--	--	--	--	--	--	--
i0_HQ_sampled12fd9_c287993_f2p0_928	--	--	--	--	--	--	--	--	--	--	--	--	--	--	--	--	--	--	--	--	--
i0_HQ_sampled12fd9_c287994_f4p0_446	--	--	--	--	--	--	--	--	--	--	--	--	--	--	--	--	--	--	--	--	--
i0_HQ_sampled12fd9_c288003_f2p0_451	--	--	--	--	--	--	--	--	--	--	--	--	--	--	--	--	--	--	--	--	--
i0_HQ_sampled12fd9_c288010_f2p0_294	--	--	--	--	--	--	--	--	--	--	--	--	--	--	--	--	--	--	--	--	--
i0_HQ_sampled12fd9_c288011_f2p0_971	--	--	--	--	--	--	--	--	--	--	--	--	--	--	--	--	--	--	--	--	--
i0_HQ_sampled12fd9_c28832_f2p11_641	gi|926628544|ref|XP_013779884.1|	PREDICTED: eukaryotic translation initiation factor 4 gamma 3-like isoform X3 [Limulus polyphemus]	--	--	crg:105345876	K03260	EIF4G	translation initiation factor 4G	ko03013	RNA transport	--	--	--	--	--	--	--	--	--	--	--
i0_HQ_sampled12fd9_c28848_f5p0_256	--	--	--	--	--	--	--	--	--	--	--	--	--	--	--	--	--	--	--	--	--
i0_HQ_sampled12fd9_c28858_f2p0_967	--	--	--	--	--	--	--	--	--	--	--	--	--	--	--	--	--	--	--	--	--
i0_HQ_sampled12fd9_c288849_f2p0_289	--	--	--	--	--	--	--	--	--	--	--	--	--	--	--	--	--	--	--	--	--
i0_HQ_sampled12fd9_c28954_f2p0_559	--	--	--	--	--	--	--	--	--	--	--	--	--	--	--	--	--	--	--	--	--
i0_HQ_sampled12fd9_c29072_f2p0_506	--	--	--	--	--	--	--	--	--	--	--	--	--	--	--	--	--	--	--	--	--
i0_HQ_sampled12fd9_c29163_f3p11_689	--	--	--	--	--	--	--	--	--	--	--	--	--	--	--	--	--	--	--	--	--
i0_HQ_sampled12fd9_c29232_f2p0_277	--	--	--	--	--	--	--	--	--	--	--	--	--	--	--	--	--	--	--	--	--
i0_HQ_sampled12fd9_c29304_f2p0_290	--	--	--	--	--	--	--	--	--	--	--	--	--	--	--	--	--	--	--	--	--
i0_HQ_sampled12fd9_c293211_f6p0_692	--	--	--	--	--	--	--	--	--	--	--	--	--	--	--	--	--	--	--	--	--
i0_HQ_sampled12fd9_c29371_f2p0_593	--	--	--	--	--	--	--	--	--	--	--	--	--	--	--	--	--	--	--	--	--
i0_HQ_sampled12fd9_c2951_f2p0_584	--	--	--	--	--	--	--	--	--	--	--	--	--	--	--	--	--	--	--	--	--
i0_HQ_sampled12fd9_c29543_f2p1_340	--	--	--	--	--	--	--	--	--	--	--	--	--	--	--	--	--	--	--	--	--
i0_HQ_sampled12fd9_c29560_f3p3_939	--	--	--	--	--	--	--	--	--	--	--	--	--	--	--	--	--	--	--	--	--
i0_HQ_sampled12fd9_c2958_f4p0_617	--	--	--	--	--	--	--	--	--	--	--	--	--	--	--	--	--	--	--	--	--
i0_HQ_sampled12fd9_c296118_f2p0_290	--	--	--	--	--	--	--	--	--	--	--	--	--	--	--	--	--	--	--	--	--
i0_HQ_sampled12fd9_c296426_f3p0_905	--	--	--	--	--	--	--	--	--	--	--	--	--	--	--	--	--	--	--	--	--
i0_HQ_sampled12fd9_c29653_f2p9_955	--	--	--	--	--	--	--	--	--	--	--	--	--	--	--	--	--	--	--	--	--
i0_HQ_sampled12fd9_c29734_f3p0_810	--	--	--	--	--	--	--	--	--	--	--	--	--	--	--	--	--	--	--	--	--
i0_HQ_sampled12fd9_c29758_f4p0_399	--	--	--	--	--	--	--	--	--	--	--	--	--	--	--	--	--	--	--	--	--
i0_HQ_sampled12fd9_c2975_f2p0_342	--	--	--	--	--	--	--	--	--	--	--	--	--	--	--	--	--	--	--	--	--
i0_HQ_sampled12fd9_c297742_f2p1_312	--	--	--	--	--	--	--	--	--	--	--	--	--	--	--	--	--	--	--	--	--
i0_HQ_sampled12fd9_c29783_f3p0_974	gi|1022778433|gb|KZS21910.1|	Uncharacterized protein APZ42_011055 [Daphnia magna]	--	--	--	--	--	--	--	--	--	--	--	--	--	--	--	--	--	--	--
i0_HQ_sampled12fd9_c29977_f2p0_271	--	--	--	--	--	--	--	--	--	--	--	--	--	--	--	--	--	--	--	--	--
i0_HQ_sampled12fd9_c30030_f2p0_724	gi|669204979|gb|AII16890.1|	mitochondrial cytochrome c oxidase subunit VIa [Antheraea yamamai]	O13085.1	RecName: Full=Cytochrome c oxidase subunit 6A, mitochondrial; AltName: Full=Cytochrome c oxidase polypeptide VIa; Flags: Precursor	bmor:101738548	K02266	COX6A	cytochrome c oxidase subunit 6a	ko00190|ko04260	Oxidative phosphorylation|Cardiac muscle contraction	--	--	--	--	--	O	ENOG411253X	Cytochrome c oxidase polypeptide VIa	Cellular Component: mitochondrial inner membrane (GO:0005743);	--	--
i0_HQ_sampled12fd9_c3004_f4p1_276	--	--	--	--	--	--	--	--	--	--	--	--	--	--	--	--	--	--	--	--	--
i0_HQ_sampled12fd9_c30181_f2p5_366	--	--	--	--	--	--	--	--	--	--	--	--	--	--	--	--	--	--	--	--	--
i0_HQ_sampled12fd9_c30394_f4p0_880	gi|310743896|dbj|BAJ23879.1|	glycogen phosphorylase [Marsupenaeus japonicus]	Q8HXW4.3	RecName: Full=Glycogen phosphorylase, muscle form; AltName: Full=Myophosphorylase	isc:IscW_ISCW000885	K00688	E2.4.1.1, glgP, PYG	glycogen phosphorylase	ko04910|ko04922|ko00500	Insulin signaling pathway|Glucagon signaling pathway|Starch and sucrose metabolism	--	--	--	--	--	G	COG0058	Phosphorylase is an important allosteric enzyme in carbohydrate metabolism. Enzymes from different sources differ in their regulatory mechanisms and in their natural substrates. However, all known phosphorylases share catalytic and structural properties (By similarity)	Biological Process: carbohydrate metabolic process (GO:0005975);|Molecular Function: glycogen phosphorylase activity (GO:0008184);|Molecular Function: pyridoxal phosphate binding (GO:0030170);	--	--
i0_HQ_sampled12fd9_c3044_f2p0_984	gi|1004398846|gb|KYB26900.1|	DNA-binding protein Ets97D-like Protein [Tribolium castaneum]	B9LZC7.1	RecName: Full=Probable transcriptional regulatory protein Geob_2326	tca:658804	K18189	TACO1	translational activator of cytochrome c oxidase 1	--	--	--	--	--	--	--	K	COG0217	transcriptional regulatory protein	--	--	--
i0_HQ_sampled12fd9_c305287_f6p0_838	gi|959241941|gb|ALR35018.1|	chymotrypsin, partial [Macrophthalmus japonicus]	P36178.1	RecName: Full=Chymotrypsin BII; Flags: Precursor	--	--	--	--	--	--	--	--	--	--	--	O	COG5640	protease	Molecular Function: serine-type peptidase activity (GO:0008236);	--	--
i0_HQ_sampled12fd9_c30559_f2p0_685	gi|919031133|ref|XP_013399191.1|	PREDICTED: 60S ribosome subunit biogenesis protein NIP7 homolog [Lingula anatina]	A4QND5.1	RecName: Full=60S ribosome subunit biogenesis protein NIP7 homolog	lcm:102354633	K07565	NIP7	60S ribosome subunit biogenesis protein NIP7	--	--	--	--	--	--	--	J	COG1374	pre-rRNA processing and 60S ribosome subunit assembly (By similarity)	--	--	--
i0_HQ_sampled12fd9_c30572_f2p0_536	--	--	--	--	--	--	--	--	--	--	--	--	--	--	--	--	--	--	--	--	--
i0_HQ_sampled12fd9_c30578_f4p0_697	--	--	--	--	--	--	--	--	--	--	--	--	--	--	--	--	--	--	--	--	--
i0_HQ_sampled12fd9_c30584_f4p0_571	--	--	--	--	--	--	--	--	--	--	--	--	--	--	--	--	--	--	--	--	--
i0_HQ_sampled12fd9_c3066_f2p0_832	--	--	--	--	--	--	--	--	--	--	--	--	--	--	--	--	--	--	--	--	--
i0_HQ_sampled12fd9_c30753_f2p0_513	--	--	--	--	--	--	--	--	--	--	--	--	--	--	--	--	--	--	--	--	--
i0_HQ_sampled12fd9_c3078_f4p0_937	gi|332271601|gb|AEE36486.1|	protein disulfide isomerase 2 [Fenneropenaeus chinensis]	Q17770.1	RecName: Full=Protein disulfide-isomerase 2; AltName: Full=PDI 1; AltName: Full=Prolyl 4-hydroxylase subunit beta-2; Flags: Precursor	aag:AaeL_AAEL000641	K09580	PDIA1, P4HB	protein disulfide-isomerase A1	ko04141	Protein processing in endoplasmic reticulum	KOG0190	Protein disulfide isomerase (prolyl 4-hydroxylase beta subunit)	[O]	CELLULAR PROCESSES AND SIGNALING	Posttranslational modification, protein turnover, chaperones	O	COG0526	Thioredoxin	Molecular Function: protein disulfide isomerase activity (GO:0003756);|Cellular Component: endoplasmic reticulum (GO:0005783);|Biological Process: cell redox homeostasis (GO:0045454);	--	--
i0_HQ_sampled12fd9_c30847_f2p7_573	--	--	--	--	--	--	--	--	--	--	--	--	--	--	--	--	--	--	--	--	--
i0_HQ_sampled12fd9_c30984_f2p0_451	--	--	--	--	--	--	--	--	--	--	--	--	--	--	--	--	--	--	--	--	--
i0_HQ_sampled12fd9_c3099_f2p1_276	--	--	--	--	--	--	--	--	--	--	--	--	--	--	--	--	--	--	--	--	--
i0_HQ_sampled12fd9_c31017_f4p10_574	--	--	--	--	--	--	--	--	--	--	--	--	--	--	--	--	--	--	--	--	--
i0_HQ_sampled12fd9_c310493_f3p0_829	--	--	--	--	--	--	--	--	--	--	--	--	--	--	--	--	--	--	--	--	--
i0_HQ_sampled12fd9_c31132_f2p0_399	--	--	--	--	--	--	--	--	--	--	--	--	--	--	--	--	--	--	--	--	--
i0_HQ_sampled12fd9_c311556_f2p0_603	--	--	--	--	--	--	--	--	--	--	--	--	--	--	--	--	--	--	--	--	--
i0_HQ_sampled12fd9_c31182_f4p0_884	--	--	--	--	--	--	--	--	--	--	--	--	--	--	--	--	--	--	--	--	--
i0_HQ_sampled12fd9_c31204_f3p0_547	gi|3907620|gb|AAC78681.1|	actin 1 [Penaeus monodon]	P07836.1	RecName: Full=Actin, muscle-type A1; Flags: Precursor	rro:104675775	K05692	ACTB_G1	actin beta/gamma 1	ko04145|ko04520|ko04670|ko04015|ko04390|ko04611|ko04391|ko04510|ko04745|ko04810|ko04530|ko04919|ko04210|ko04921	Phagosome|Adherens junction|Leukocyte transendothelial migration|Rap1 signaling pathway|Hippo signaling pathway|Platelet activation|Hippo signaling pathway - fly|Focal adhesion|Phototransduction - fly|Regulation of actin cytoskeleton|Tight junction|Thyroid hormone signaling pathway|Apoptosis|Oxytocin signaling pathway	KOG0676	Actin and related proteins	[Z]	CELLULAR PROCESSES AND SIGNALING	Cytoskeleton	Z	COG5277	Actin-related protein	Molecular Function: ATP binding (GO:0005524);	--	--
i0_HQ_sampled12fd9_c31386_f3p0_976	--	--	--	--	--	--	--	--	--	--	--	--	--	--	--	--	--	--	--	--	--
i0_HQ_sampled12fd9_c3139_f5p0_384	--	--	--	--	--	--	--	--	--	--	--	--	--	--	--	--	--	--	--	--	--
i0_HQ_sampled12fd9_c31400_f3p0_563	--	--	--	--	--	--	--	--	--	--	--	--	--	--	--	--	--	--	--	--	--
i0_HQ_sampled12fd9_c31538_f3p0_609	--	--	--	--	--	--	--	--	--	--	--	--	--	--	--	--	--	--	--	--	--
i0_HQ_sampled12fd9_c316316_f2p0_336	--	--	--	--	--	--	--	--	--	--	--	--	--	--	--	--	--	--	--	--	--
i0_HQ_sampled12fd9_c31655_f2p0_721	--	--	--	--	--	--	--	--	--	--	--	--	--	--	--	--	--	--	--	--	--
i0_HQ_sampled12fd9_c31669_f2p0_934	--	--	--	--	--	--	--	--	--	--	--	--	--	--	--	--	--	--	--	--	--
i0_HQ_sampled12fd9_c317884_f2p0_477	--	--	--	--	--	--	--	--	--	--	--	--	--	--	--	--	--	--	--	--	--
i0_HQ_sampled12fd9_c31801_f2p0_899	gi|926615157|ref|XP_013772646.1|	PREDICTED: cytochrome c1, heme protein, mitochondrial-like [Limulus polyphemus]	P08574.3	RecName: Full=Cytochrome c1, heme protein, mitochondrial; AltName: Full=Complex III subunit 4; AltName: Full=Complex III subunit IV; AltName: Full=Cytochrome b-c1 complex subunit 4; AltName: Full=Ubiquinol-cytochrome-c reductase complex cytochrome c1 subunit; Short=Cytochrome c-1; Flags: Precursor	lcm:102358810	K00413	CYC1, CYT1, petC	ubiquinol-cytochrome c reductase cytochrome c1 subunit	ko00190|ko02020|ko04260	Oxidative phosphorylation|Two-component system|Cardiac muscle contraction	--	--	--	--	--	C	COG2857	cytochrome c1	--	--	--
i0_HQ_sampled12fd9_c31806_f2p2_982	--	--	--	--	--	--	--	--	--	--	--	--	--	--	--	--	--	--	--	--	--
i0_HQ_sampled12fd9_c31865_f2p0_323	--	--	--	--	--	--	--	--	--	--	--	--	--	--	--	--	--	--	--	--	--
i0_HQ_sampled12fd9_c32126_f2p7_378	--	--	--	--	--	--	--	--	--	--	--	--	--	--	--	--	--	--	--	--	--
i0_HQ_sampled12fd9_c321479_f4p0_258	--	--	--	--	--	--	--	--	--	--	--	--	--	--	--	--	--	--	--	--	--
i0_HQ_sampled12fd9_c321848_f2p0_932	--	--	--	--	--	--	--	--	--	--	--	--	--	--	--	--	--	--	--	--	--
i0_HQ_sampled12fd9_c322467_f3p0_968	--	--	--	--	--	--	--	--	--	--	--	--	--	--	--	--	--	--	--	--	--
i0_HQ_sampled12fd9_c32252_f2p0_755	--	--	--	--	--	--	--	--	--	--	--	--	--	--	--	--	--	--	--	--	--
i0_HQ_sampled12fd9_c32363_f2p0_296	--	--	--	--	--	--	--	--	--	--	--	--	--	--	--	--	--	--	--	--	--
i0_HQ_sampled12fd9_c32387_f6p0_477	--	--	--	--	--	--	--	--	--	--	--	--	--	--	--	--	--	--	--	--	--
i0_HQ_sampled12fd9_c32506_f2p0_962	gi|414151646|gb|AFW98996.1|	serine protease 2 [Litopenaeus vannamei]	P26262.2	RecName: Full=Plasma kallikrein; AltName: Full=Fletcher factor; AltName: Full=Kininogenin; AltName: Full=Plasma prekallikrein; Contains: RecName: Full=Plasma kallikrein heavy chain; Contains: RecName: Full=Plasma kallikrein light chain; Flags: Precursor	--	--	--	--	--	--	--	--	--	--	--	O	COG5640	protease	Molecular Function: hydrolase activity (GO:0016787);	--	--
i0_HQ_sampled12fd9_c32511_f4p7_332	--	--	--	--	--	--	--	--	--	--	--	--	--	--	--	--	--	--	--	--	--
i0_HQ_sampled12fd9_c326448_f2p0_649	--	--	--	--	--	--	--	--	--	--	--	--	--	--	--	--	--	--	--	--	--
i0_HQ_sampled12fd9_c32747_f3p0_482	--	--	--	--	--	--	--	--	--	--	--	--	--	--	--	--	--	--	--	--	--
i0_HQ_sampled12fd9_c3278_f2p0_890	gi|170016234|ref|YP_001728982.1|	NADH dehydrogenase subunit 1 (mitochondrion) [Brachionus plicatilis]	O78706.1	RecName: Full=NADH-ubiquinone oxidoreductase chain 1; AltName: Full=NADH dehydrogenase subunit 1	pxy:20834457	K03878	ND1	NADH-ubiquinone oxidoreductase chain 1	ko00190	Oxidative phosphorylation	--	--	--	--	--	C	COG1005	NDH-1 shuttles electrons from NADH, via FMN and iron- sulfur (Fe-S) centers, to quinones in the respiratory chain. The immediate electron acceptor for the enzyme in this species is believed to be ubiquinone. Couples the redox reaction to proton translocation (for every two electrons transferred, four hydrogen ions are translocated across the cytoplasmic membrane), and thus conserves the redox ene…	Cellular Component: mitochondrion (GO:0005739);|Cellular Component: membrane (GO:0016020);|Molecular Function: oxidoreductase activity (GO:0016491);	--	--
i0_HQ_sampled12fd9_c328777_f2p0_364	--	--	--	--	--	--	--	--	--	--	--	--	--	--	--	--	--	--	--	--	--
i0_HQ_sampled12fd9_c32886_f3p0_324	--	--	--	--	--	--	--	--	--	--	--	--	--	--	--	--	--	--	--	--	--
i0_HQ_sampled12fd9_c32922_f3p0_351	gi|943949123|ref|XP_014357598.1|	PREDICTED: 39S ribosomal protein L33, mitochondrial [Papilio machaon]	Q9W4L1.2	RecName: Full=39S ribosomal protein L33, mitochondrial; Short=L33mt; Short=MRP-L33; Flags: Precursor	dan:Dana_GF21473	K02913	RP-L33, MRPL33, rpmG	large subunit ribosomal protein L33	ko03010	Ribosome	--	--	--	--	--	J	ENOG4112B1M	Ribosomal protein L33	Cellular Component: intracellular (GO:0005622);	--	--
i0_HQ_sampled12fd9_c32940_f2p0_531	--	--	--	--	--	--	--	--	--	--	--	--	--	--	--	--	--	--	--	--	--
i0_HQ_sampled12fd9_c32946_f2p0_548	--	--	--	--	--	--	--	--	--	--	--	--	--	--	--	--	--	--	--	--	--
i0_HQ_sampled12fd9_c329695_f2p0_475	--	--	--	--	--	--	--	--	--	--	--	--	--	--	--	--	--	--	--	--	--
i0_HQ_sampled12fd9_c330443_f7p0_515	--	--	--	--	--	--	--	--	--	--	--	--	--	--	--	--	--	--	--	--	--
i0_HQ_sampled12fd9_c330519_f6p0_484	gi|3907620|gb|AAC78681.1|	actin 1 [Penaeus monodon]	P45521.1	RecName: Full=Actin	rro:104675775	K05692	ACTB_G1	actin beta/gamma 1	ko04145|ko04520|ko04670|ko04015|ko04390|ko04611|ko04391|ko04510|ko04745|ko04810|ko04530|ko04919|ko04210|ko04921	Phagosome|Adherens junction|Leukocyte transendothelial migration|Rap1 signaling pathway|Hippo signaling pathway|Platelet activation|Hippo signaling pathway - fly|Focal adhesion|Phototransduction - fly|Regulation of actin cytoskeleton|Tight junction|Thyroid hormone signaling pathway|Apoptosis|Oxytocin signaling pathway	KOG0676	Actin and related proteins	[Z]	CELLULAR PROCESSES AND SIGNALING	Cytoskeleton	Z	COG5277	Actin-related protein	Molecular Function: ATP binding (GO:0005524);	--	--
i0_HQ_sampled12fd9_c330528_f12p0_840	gi|914556000|gb|KOB65514.1|	BTB/POZ domain-containing protein [Operophtera brumata]	Q7ZUG0.1	RecName: Full=Small nuclear ribonucleoprotein E; Short=snRNP-E; AltName: Full=Sm protein E; Short=Sm-E; Short=SmE	bmor:732904	K11097	SNRPE, SME	small nuclear ribonucleoprotein E	ko03040	Spliceosome	--	--	--	--	--	K	COG1958	small nuclear ribonucleoprotein	--	--	--
i0_HQ_sampled12fd9_c330538_f11p0_360	gi|766544321|gb|AJS14565.1|	cysteine-rich protein [Macrobrachium nipponense]	Q0VFX8.1	RecName: Full=Cysteine-rich protein 2; Short=CRP-2	--	--	--	--	--	--	--	--	--	--	--	S	ENOG4111U5J	Cysteine-rich protein	Molecular Function: zinc ion binding (GO:0008270);	--	--
i0_HQ_sampled12fd9_c330555_f10p0_231	--	--	--	--	--	--	--	--	--	--	--	--	--	--	--	--	--	--	--	--	--
i0_HQ_sampled12fd9_c330560_f10p1_405	--	--	--	--	--	--	--	--	--	--	--	--	--	--	--	--	--	--	--	--	--
i0_HQ_sampled12fd9_c330595_f5p0_482	--	--	--	--	--	--	--	--	--	--	--	--	--	--	--	--	--	--	--	--	--
i0_HQ_sampled12fd9_c330632_f8p0_983	--	--	--	--	--	--	--	--	--	--	--	--	--	--	--	--	--	--	--	--	--
i0_HQ_sampled12fd9_c33065_f2p0_584	--	--	--	--	--	--	--	--	--	--	--	--	--	--	--	--	--	--	--	--	--
i0_HQ_sampled12fd9_c33066_f2p0_736	--	--	--	--	--	--	--	--	--	--	--	--	--	--	--	--	--	--	--	--	--
i0_HQ_sampled12fd9_c330696_f4p0_571	--	--	--	--	--	--	--	--	--	--	--	--	--	--	--	--	--	--	--	--	--
i0_HQ_sampled12fd9_c330702_f4p0_333	gi|961092842|ref|XP_014772628.1|	PREDICTED: 60S ribosomal protein L19-like [Octopus bimaculoides]	P49693.3	RecName: Full=60S ribosomal protein L19-3	obi:106870909	K02885	RP-L19e, RPL19	large subunit ribosomal protein L19e	ko03010	Ribosome	--	--	--	--	--	J	COG2147	ribosomal protein L19	Molecular Function: structural constituent of ribosome (GO:0003735);|Cellular Component: ribosome (GO:0005840);|Biological Process: translation (GO:0006412);	--	--
i0_HQ_sampled12fd9_c330719_f6p26_488	--	--	--	--	--	--	--	--	--	--	--	--	--	--	--	--	--	--	--	--	--
i0_HQ_sampled12fd9_c330729_f7p0_372	gi|62484806|emb|CAI78901.1|	hemocyanin subunit 1 [Gammarus roeselii]	P04254.2	RecName: Full=Hemocyanin A chain	--	--	--	--	--	--	--	--	--	--	--	S	ENOG4111KTW	prophenoloxidase	Molecular Function: oxidoreductase activity (GO:0016491);|Molecular Function: metal ion binding (GO:0046872);|Biological Process: oxidation-reduction process (GO:0055114);	--	--
i0_HQ_sampled12fd9_c330839_f4p0_410	--	--	--	--	--	--	--	--	--	--	--	--	--	--	--	--	--	--	--	--	--
i0_HQ_sampled12fd9_c330840_f3p0_751	--	--	--	--	--	--	--	--	--	--	--	--	--	--	--	--	--	--	--	--	--
i0_HQ_sampled12fd9_c330873_f5p0_239	gi|159145660|gb|ABW90367.1|	putative ribosomal protein L35a, partial [Sipunculus nudus]	P49180.3	RecName: Full=60S ribosomal protein L35a	obi:106875817	K02917	RP-L35Ae, RPL35A	large subunit ribosomal protein L35Ae	ko03010	Ribosome	--	--	--	--	--	J	COG2451	Ribosomal protein	Cellular Component: intracellular (GO:0005622);	--	--
i0_HQ_sampled12fd9_c330918_f2p0_249	--	--	--	--	--	--	--	--	--	--	--	--	--	--	--	--	--	--	--	--	--
i0_HQ_sampled12fd9_c330940_f3p0_235	--	--	--	--	--	--	--	--	--	--	--	--	--	--	--	--	--	--	--	--	--
i0_HQ_sampled12fd9_c330948_f3p0_296	--	--	--	--	--	--	--	--	--	--	--	--	--	--	--	--	--	--	--	--	--
i0_HQ_sampled12fd9_c330963_f2p27_322	--	--	--	--	--	--	--	--	--	--	--	--	--	--	--	--	--	--	--	--	--
i0_HQ_sampled12fd9_c331000_f9p0_690	--	--	--	--	--	--	--	--	--	--	--	--	--	--	--	--	--	--	--	--	--
i0_HQ_sampled12fd9_c331031_f3p0_284	--	--	--	--	--	--	--	--	--	--	--	--	--	--	--	--	--	--	--	--	--
i0_HQ_sampled12fd9_c331065_f2p0_564	--	--	--	--	--	--	--	--	--	--	--	--	--	--	--	--	--	--	--	--	--
i0_HQ_sampled12fd9_c331084_f6p0_587	--	--	--	--	--	--	--	--	--	--	--	--	--	--	--	--	--	--	--	--	--
i0_HQ_sampled12fd9_c331110_f4p0_764	--	--	--	--	--	--	--	--	--	--	--	--	--	--	--	--	--	--	--	--	--
i0_HQ_sampled12fd9_c331133_f4p0_234	gi|808873242|gb|KKF22595.1|	Anionic trypsin-1 [Larimichthys crocea]	P07146.1	RecName: Full=Anionic trypsin-2; AltName: Full=Anionic trypsin II; AltName: Full=Pretrypsinogen II; AltName: Full=Serine protease 2; Flags: Precursor	--	--	--	--	--	--	--	--	--	--	--	O	COG5640	protease	--	--	--
i0_HQ_sampled12fd9_c331160_f4p0_556	--	--	--	--	--	--	--	--	--	--	--	--	--	--	--	--	--	--	--	--	--
i0_HQ_sampled12fd9_c331209_f2p0_230	--	--	--	--	--	--	--	--	--	--	--	--	--	--	--	--	--	--	--	--	--
i0_HQ_sampled12fd9_c331236_f3p0_410	--	--	--	--	--	--	--	--	--	--	--	--	--	--	--	--	--	--	--	--	--
i0_HQ_sampled12fd9_c331247_f2p0_232	--	--	--	--	--	--	--	--	--	--	--	--	--	--	--	--	--	--	--	--	--
i0_HQ_sampled12fd9_c331251_f3p0_285	--	--	--	--	--	--	--	--	--	--	--	--	--	--	--	--	--	--	--	--	--
i0_HQ_sampled12fd9_c331254_f3p0_535	--	--	--	--	--	--	--	--	--	--	--	--	--	--	--	--	--	--	--	PF01391.17	Collagen triple helix repeat (20 copies)
i0_HQ_sampled12fd9_c331259_f3p0_331	--	--	--	--	--	--	--	--	--	--	--	--	--	--	--	--	--	--	--	--	--
i0_HQ_sampled12fd9_c331262_f4p0_419	--	--	--	--	--	--	--	--	--	--	--	--	--	--	--	--	--	--	--	--	--
i0_HQ_sampled12fd9_c331299_f4p0_410	gi|751868544|ref|YP_009118047.1|	NADH dehydrogenase subunit 4 (mitochondrion) [Brachyuropus grewingkii]	P18931.3	RecName: Full=NADH-ubiquinone oxidoreductase chain 4; AltName: Full=NADH dehydrogenase subunit 4	--	--	--	--	--	--	--	--	--	--	--	--	--	--	Cellular Component: membrane (GO:0016020);|Molecular Function: oxidoreductase activity (GO:0016491);|Biological Process: ATP synthesis coupled electron transport (GO:0042773);	--	--
i0_HQ_sampled12fd9_c331307_f4p0_545	--	--	--	--	--	--	--	--	--	--	--	--	--	--	--	--	--	--	--	--	--
i0_HQ_sampled12fd9_c331314_f6p0_432	--	--	--	--	--	--	--	--	--	--	--	--	--	--	--	--	--	--	--	--	--
i0_HQ_sampled12fd9_c331360_f3p0_391	--	--	--	--	--	--	--	--	--	--	--	--	--	--	--	--	--	--	--	--	--
i0_HQ_sampled12fd9_c331380_f9p0_592	--	--	--	--	--	--	--	--	--	--	--	--	--	--	--	--	--	--	--	--	--
i0_HQ_sampled12fd9_c33141_f2p8_400	--	--	--	--	--	--	--	--	--	--	--	--	--	--	--	--	--	--	--	--	--
i0_HQ_sampled12fd9_c331509_f2p0_232	--	--	--	--	--	--	--	--	--	--	--	--	--	--	--	--	--	--	--	--	--
i0_HQ_sampled12fd9_c33157_f2p0_691	--	--	--	--	--	--	--	--	--	--	--	--	--	--	--	--	--	--	--	--	--
i0_HQ_sampled12fd9_c332774_f2p0_229	--	--	--	--	--	--	--	--	--	--	--	--	--	--	--	--	--	--	--	--	--
i0_HQ_sampled12fd9_c334234_f6p0_707	gi|919039005|ref|XP_013402998.1|	PREDICTED: 60S ribosomal protein L12-like [Lingula anatina]	P35979.2	RecName: Full=60S ribosomal protein L12	sko:100374252	K02870	RP-L12e, RPL12	large subunit ribosomal protein L12e	ko03010	Ribosome	--	--	--	--	--	J	COG0080	This protein binds directly to 23S ribosomal RNA (By similarity)	--	--	--
i0_HQ_sampled12fd9_c33457_f3p0_620	--	--	--	--	--	--	--	--	--	--	--	--	--	--	--	--	--	--	--	--	--
i0_HQ_sampled12fd9_c334759_f6p0_420	--	--	--	--	--	--	--	--	--	--	--	--	--	--	--	--	--	--	--	--	--
i0_HQ_sampled12fd9_c33537_f2p0_344	--	--	--	--	--	--	--	--	--	--	--	--	--	--	--	--	--	--	--	--	--
i0_HQ_sampled12fd9_c33583_f2p0_362	--	--	--	--	--	--	--	--	--	--	--	--	--	--	--	--	--	--	--	--	--
i0_HQ_sampled12fd9_c339587_f2p0_249	--	--	--	--	--	--	--	--	--	--	--	--	--	--	--	--	--	--	--	--	--
i0_HQ_sampled12fd9_c34030_f2p0_413	--	--	--	--	--	--	--	--	--	--	--	--	--	--	--	--	--	--	--	--	--
i0_HQ_sampled12fd9_c34055_f3p0_462	--	--	--	--	--	--	--	--	--	--	--	--	--	--	--	--	--	--	--	--	--
i0_HQ_sampled12fd9_c340626_f2p0_229	gi|262401289|gb|ACY66547.1|	ribosomal protein L5, partial [Scylla paramamosain]	O65353.1	RecName: Full=60S ribosomal protein L5	--	--	--	--	--	--	--	--	--	--	--	J	COG0256	This is one of the proteins that binds and probably mediates the attachment of the 5S RNA into the large ribosomal subunit, where it forms part of the central protuberance (By similarity)	--	--	--
i0_HQ_sampled12fd9_c340778_f2p0_236	--	--	--	--	--	--	--	--	--	--	--	--	--	--	--	--	--	--	--	--	--
i0_HQ_sampled12fd9_c34111_f5p0_500	--	--	--	--	--	--	--	--	--	--	--	--	--	--	--	--	--	--	--	--	--
i0_HQ_sampled12fd9_c34231_f2p0_583	--	--	--	--	--	--	--	--	--	--	--	--	--	--	--	--	--	--	--	--	--
i0_HQ_sampled12fd9_c34275_f2p0_914	--	--	--	--	--	--	--	--	--	--	--	--	--	--	--	--	--	--	--	--	--
i0_HQ_sampled12fd9_c34379_f4p0_886	--	--	--	--	--	--	--	--	--	--	--	--	--	--	--	--	--	--	--	--	--
i0_HQ_sampled12fd9_c3439_f2p0_941	--	--	--	--	--	--	--	--	--	--	--	--	--	--	--	--	--	--	--	--	--
i0_HQ_sampled12fd9_c3441_f2p6_500	--	--	--	--	--	--	--	--	--	--	--	--	--	--	--	--	--	--	--	--	--
i0_HQ_sampled12fd9_c34451_f3p0_323	--	--	--	--	--	--	--	--	--	--	--	--	--	--	--	--	--	--	--	--	--
i0_HQ_sampled12fd9_c344728_f2p0_731	--	--	--	--	--	--	--	--	--	--	--	--	--	--	--	--	--	--	--	--	--
i0_HQ_sampled12fd9_c34644_f2p0_791	--	--	--	--	--	--	--	--	--	--	--	--	--	--	--	--	--	--	--	--	--
i0_HQ_sampled12fd9_c34656_f2p0_328	--	--	--	--	--	--	--	--	--	--	--	--	--	--	--	--	--	--	--	--	--
i0_HQ_sampled12fd9_c346580_f3p0_413	gi|942363563|gb|JAN63711.1|	40S ribosomal protein S6 [Daphnia magna]	Q9BMX5.1	RecName: Full=40S ribosomal protein S6	tca:656796	K02991	RP-S6e, RPS6	small subunit ribosomal protein S6e	ko03010|ko04066|ko04910|ko04151|ko04150	Ribosome|HIF-1 signaling pathway|Insulin signaling pathway|PI3K-Akt signaling pathway|mTOR signaling pathway	--	--	--	--	--	J	COG2125	40s ribosomal protein s6	Molecular Function: structural constituent of ribosome (GO:0003735);|Cellular Component: ribosome (GO:0005840);|Biological Process: translation (GO:0006412);|Cellular Component: integral component of membrane (GO:0016021);	--	--
i0_HQ_sampled12fd9_c34733_f2p0_944	--	--	--	--	--	--	--	--	--	--	--	--	--	--	--	--	--	--	--	--	--
i0_HQ_sampled12fd9_c3476_f3p0_537	--	--	--	--	--	--	--	--	--	--	--	--	--	--	--	--	--	--	--	--	--
i0_HQ_sampled12fd9_c34875_f2p0_560	--	--	--	--	--	--	--	--	--	--	--	--	--	--	--	--	--	--	--	--	--
i0_HQ_sampled12fd9_c348999_f2p0_231	--	--	--	--	--	--	--	--	--	--	--	--	--	--	--	--	--	--	--	--	--
i0_HQ_sampled12fd9_c349036_f2p0_250	--	--	--	--	--	--	--	--	--	--	--	--	--	--	--	--	--	--	--	--	--
i0_HQ_sampled12fd9_c34908_f2p0_564	gi|568599688|gb|AHE13885.1|	glutathione S-transferase sigma [Brachionus sp. 'koreanus']	--	--	--	--	--	--	--	--	--	--	--	--	--	--	--	--	--	--	--
i0_HQ_sampled12fd9_c34945_f4p0_559	--	--	--	--	--	--	--	--	--	--	--	--	--	--	--	--	--	--	--	--	--
i0_HQ_sampled12fd9_c34968_f3p0_636	--	--	--	--	--	--	--	--	--	--	--	--	--	--	--	--	--	--	--	--	--
i0_HQ_sampled12fd9_c3505_f5p4_674	--	--	--	--	--	--	--	--	--	--	--	--	--	--	--	--	--	--	--	--	--
i0_HQ_sampled12fd9_c3507_f2p0_333	--	--	--	--	--	--	--	--	--	--	--	--	--	--	--	--	--	--	--	--	--
i0_HQ_sampled12fd9_c35193_f2p0_303	gi|672106653|gb|AIJ02079.1|	amylase [Litopenaeus vannamei]	--	--	spu:587610	K01176	E3.2.1.1, amyA, malS	alpha-amylase	ko04973|ko00500	Carbohydrate digestion and absorption|Starch and sucrose metabolism	--	--	--	--	--	G	COG0366	alpha amylase, catalytic	Biological Process: metabolic process (GO:0008152);|Molecular Function: hydrolase activity, acting on glycosyl bonds (GO:0016798);	--	--
i0_HQ_sampled12fd9_c35327_f3p0_566	--	--	--	--	--	--	--	--	--	--	--	--	--	--	--	--	--	--	--	--	--
i0_HQ_sampled12fd9_c355056_f4p0_583	gi|968105767|ref|XP_002051227.2|	uncharacterized protein Dvir_GJ13428 [Drosophila virilis]	Q9U3Z7.1	RecName: Full=NHP2-like protein 1 homolog; AltName: Full=Protein hoi-polloi	dvi:Dvir_GJ13428	K12845	SNU13, NHP2L	U4/U6 small nuclear ribonucleoprotein SNU13	ko03008|ko03040	Ribosome biogenesis in eukaryotes|Spliceosome	--	--	--	--	--	J	COG1358	(ribosomal) protein	Molecular Function: RNA binding (GO:0003723);|Cellular Component: nucleolus (GO:0005730);|Cellular Component: intracellular ribonucleoprotein complex (GO:0030529);|Biological Process: ribosome biogenesis (GO:0042254);	--	--
i0_HQ_sampled12fd9_c355436_f2p0_811	--	--	--	--	--	--	--	--	--	--	--	--	--	--	--	--	--	--	--	--	--
i0_HQ_sampled12fd9_c35564_f4p0_813	gi|209972750|gb|ACJ03792.1|	ubiquitin-conjugating enzyme E2 [Scylla paramamosain]	Q9DDJ0.1	RecName: Full=SUMO-conjugating enzyme UBC9-B; AltName: Full=RING-type E3 SUMO transferase UBC9-B; AltName: Full=SUMO-protein ligase B; AltName: Full=Ubiquitin carrier protein 9-B; AltName: Full=Ubiquitin carrier protein I-B; AltName: Full=Ubiquitin-conjugating enzyme E2 I-B; AltName: Full=Ubiquitin-protein ligase I-B	nvi:100115750	K10577	UBE2I, UBC9	ubiquitin-conjugating enzyme E2 I	ko04120|ko03013|ko04064	Ubiquitin mediated proteolysis|RNA transport|NF-kappa B signaling pathway	KOG0424	Ubiquitin-protein ligase	[O]	CELLULAR PROCESSES AND SIGNALING	Posttranslational modification, protein turnover, chaperones	O	COG5078	ubiquitin-conjugating enzyme	Molecular Function: ATP binding (GO:0005524);|Biological Process: protein sumoylation (GO:0016925);|Molecular Function: SUMO transferase activity (GO:0019789);	--	--
i0_HQ_sampled12fd9_c3565_f13p0_320	gi|679991666|gb|KFX44404.1|	60S ribosomal protein L39, partial [Talaromyces marneffei PM1]	Q90YS9.1	RecName: Full=60S ribosomal protein L39	isc:IscW_ISCW015391	K02924	RP-L39e, RPL39	large subunit ribosomal protein L39e	ko03010	Ribosome	KOG0002	60s ribosomal protein L39	[J]	INFORMATION STORAGE AND PROCESSING	Translation, ribosomal structure and biogenesis	J	COG2167	Ribosomal protein	--	--	--
i0_HQ_sampled12fd9_c35694_f2p0_758	--	--	--	--	--	--	--	--	--	--	--	--	--	--	--	--	--	--	--	--	--
i0_HQ_sampled12fd9_c3569_f6p0_968	--	--	--	--	--	--	--	--	--	--	--	--	--	--	--	--	--	--	--	--	--
i0_HQ_sampled12fd9_c358194_f9p0_905	--	--	--	--	--	--	--	--	--	--	--	--	--	--	--	--	--	--	--	--	--
i0_HQ_sampled12fd9_c358_f27p0_665	gi|342326346|gb|AEL23088.1|	small nuclear ribonucleoprotein polypeptide G [Cherax quadricarinatus]	Q9VXE0.1	RecName: Full=Probable small nuclear ribonucleoprotein G; Short=snRNP-G; AltName: Full=Sm protein G; Short=Sm-G; Short=SmG	xla:779307	K11099	SNRPG, SMG	small nuclear ribonucleoprotein G	ko03040	Spliceosome	--	--	--	--	--	K	ENOG41122Q1	Small nuclear ribonucleoprotein	Biological Process: mRNA splicing, via spliceosome (GO:0000398);|Molecular Function: RNA binding (GO:0003723);|Cellular Component: small nucleolar ribonucleoprotein complex (GO:0005732);|Cellular Component: viral nucleocapsid (GO:0019013);	--	--
i0_HQ_sampled12fd9_c360961_f2p0_958	--	--	--	--	--	--	--	--	--	--	--	--	--	--	--	--	--	--	--	--	--
i0_HQ_sampled12fd9_c36344_f3p0_368	gi|326517276|dbj|BAK00005.1|	predicted protein [Hordeum vulgare subsp. vulgare]	P69151.2	RecName: Full=Histone H4, minor	--	--	--	--	--	--	--	--	--	--	--	B	COG2036	Core component of nucleosome. Nucleosomes wrap and compact DNA into chromatin, limiting DNA accessibility to the cellular machineries which require DNA as a template. Histones thereby play a central role in transcription regulation, DNA repair, DNA replication and chromosomal stability. DNA accessibility is regulated via a complex set of post-translational modifications of histones, also called h…	Cellular Component: nucleosome (GO:0000786);|Molecular Function: DNA binding (GO:0003677);|Cellular Component: nucleus (GO:0005634);|Molecular Function: protein heterodimerization activity (GO:0046982);	--	--
i0_HQ_sampled12fd9_c36353_f2p0_699	--	--	--	--	--	--	--	--	--	--	--	--	--	--	--	--	--	--	--	--	--
i0_HQ_sampled12fd9_c36389_f3p0_374	--	--	--	--	--	--	--	--	--	--	--	--	--	--	--	--	--	--	--	--	--
i0_HQ_sampled12fd9_c364476_f6p0_477	gi|954476503|gb|KRZ06575.1|	40S ribosomal protein S8 [Trichinella zimbabwensis]	P62241.2	RecName: Full=40S ribosomal protein S8; AltName: Full=Small ribosomal subunit protein eS8	tsp:Tsp_06170	K02995	RP-S8e, RPS8	small subunit ribosomal protein S8e	ko03010	Ribosome	--	--	--	--	--	L	COG1041	RNA methylase	Molecular Function: nucleic acid binding (GO:0003676);|Molecular Function: structural constituent of ribosome (GO:0003735);|Molecular Function: metalloendopeptidase activity (GO:0004222);|Cellular Component: ribosome (GO:0005840);|Biological Process: translation (GO:0006412);|Biological Process: proteolysis (GO:0006508);|Molecular Function: methyltransferase activity (GO:0008168);|Biological Proc…	--	--
i0_HQ_sampled12fd9_c36468_f4p11_745	--	--	--	--	--	--	--	--	--	--	--	--	--	--	--	--	--	--	--	--	--
i0_HQ_sampled12fd9_c3653_f4p3_641	--	--	--	--	--	--	--	--	--	--	--	--	--	--	--	--	--	--	--	--	--
i0_HQ_sampled12fd9_c3658_f3p0_356	--	--	--	--	--	--	--	--	--	--	--	--	--	--	--	--	--	--	--	--	--
i0_HQ_sampled12fd9_c366312_f4p0_240	--	--	--	--	--	--	--	--	--	--	--	--	--	--	--	--	--	--	--	--	--
i0_HQ_sampled12fd9_c36648_f3p0_479	--	--	--	--	--	--	--	--	--	--	--	--	--	--	--	--	--	--	--	--	--
i0_HQ_sampled12fd9_c366599_f2p0_243	--	--	--	--	--	--	--	--	--	--	--	--	--	--	--	--	--	--	--	--	--
i0_HQ_sampled12fd9_c367228_f3p0_417	--	--	--	--	--	--	--	--	--	--	--	--	--	--	--	--	--	--	--	--	--
i0_HQ_sampled12fd9_c367868_f4p0_236	--	--	--	--	--	--	--	--	--	--	--	--	--	--	--	--	--	--	--	--	--
i0_HQ_sampled12fd9_c36789_f2p1_543	gi|309951472|gb|ADO95151.1|	ribosomal protein L32 [Antheraea yamamai]	Q962T1.1	RecName: Full=60S ribosomal protein L32	tca:658058	K02912	RP-L32e, RPL32	large subunit ribosomal protein L32e	ko03010	Ribosome	--	--	--	--	--	J	COG1717	(ribosomal) protein	Molecular Function: structural constituent of ribosome (GO:0003735);|Cellular Component: ribosome (GO:0005840);|Biological Process: translation (GO:0006412);	--	--
i0_HQ_sampled12fd9_c36795_f3p0_487	gi|357631258|gb|EHJ78848.1|	hypothetical protein KGM_10301 [Danaus plexippus]	Q9VLV5.1	RecName: Full=Probable small nuclear ribonucleoprotein E; Short=snRNP-E; AltName: Full=Sm protein E; Short=Sm-E; Short=SmE	nvi:100119346	K11097	SNRPE, SME	small nuclear ribonucleoprotein E	ko03040	Spliceosome	--	--	--	--	--	K	COG1958	small nuclear ribonucleoprotein	Biological Process: mRNA splicing, via spliceosome (GO:0000398);|Cellular Component: spliceosomal complex (GO:0005681);	--	--
i0_HQ_sampled12fd9_c36904_f3p0_835	gi|1000749845|ref|XP_015597728.1|	PREDICTED: U3 small nucleolar ribonucleoprotein protein IMP3 [Cephus cinctus]	Q3T0M3.1	RecName: Full=U3 small nucleolar ribonucleoprotein protein IMP3; Short=U3 snoRNP protein IMP3	ola:101155298	K14560	IMP3	U3 small nucleolar ribonucleoprotein protein IMP3	ko03008	Ribosome biogenesis in eukaryotes	--	--	--	--	--	J	COG0522	One of the primary rRNA binding proteins, it binds directly to 16S rRNA where it nucleates assembly of the body of the 30S subunit (By similarity)	--	--	--
i0_HQ_sampled12fd9_c3702_f2p8_320	--	--	--	--	--	--	--	--	--	--	--	--	--	--	--	--	--	--	--	--	--
i0_HQ_sampled12fd9_c37110_f2p0_288	--	--	--	--	--	--	--	--	--	--	--	--	--	--	--	--	--	--	--	--	--
i0_HQ_sampled12fd9_c37140_f2p0_414	--	--	--	--	--	--	--	--	--	--	--	--	--	--	--	--	--	--	--	--	--
i0_HQ_sampled12fd9_c372615_f3p0_239	gi|1031915576|gb|ANG56301.1|	amylase [Eriocheir sinensis]	P08144.1	RecName: Full=Alpha-amylase A; AltName: Full=1,4-alpha-D-glucan glucanohydrolase; Flags: Precursor	dan:Dana_GF18843	K01176	E3.2.1.1, amyA, malS	alpha-amylase	ko04973|ko00500	Carbohydrate digestion and absorption|Starch and sucrose metabolism	--	--	--	--	--	G	COG0366	alpha amylase, catalytic	--	--	--
i0_HQ_sampled12fd9_c37271_f4p2_473	--	--	--	--	--	--	--	--	--	--	--	--	--	--	--	--	--	--	--	--	--
i0_HQ_sampled12fd9_c37273_f2p2_278	--	--	--	--	--	--	--	--	--	--	--	--	--	--	--	--	--	--	--	--	--
i0_HQ_sampled12fd9_c37386_f2p0_542	--	--	--	--	--	--	--	--	--	--	--	--	--	--	--	--	--	--	--	--	--
i0_HQ_sampled12fd9_c37402_f2p0_637	--	--	--	--	--	--	--	--	--	--	--	--	--	--	--	--	--	--	--	--	--
i0_HQ_sampled12fd9_c374197_f2p0_233	--	--	--	--	--	--	--	--	--	--	--	--	--	--	--	--	--	--	--	--	--
i0_HQ_sampled12fd9_c374343_f50p0_536	--	--	--	--	--	--	--	--	--	--	--	--	--	--	--	--	--	--	--	--	--
i0_HQ_sampled12fd9_c374345_f11p0_507	gi|62484806|emb|CAI78901.1|	hemocyanin subunit 1 [Gammarus roeselii]	P04254.2	RecName: Full=Hemocyanin A chain	--	--	--	--	--	--	--	--	--	--	--	S	ENOG4111KTW	prophenoloxidase	Molecular Function: oxidoreductase activity (GO:0016491);|Molecular Function: metal ion binding (GO:0046872);|Biological Process: oxidation-reduction process (GO:0055114);	--	--
i0_HQ_sampled12fd9_c374349_f5p0_279	--	--	--	--	--	--	--	--	--	--	--	--	--	--	--	--	--	--	--	--	--
i0_HQ_sampled12fd9_c374350_f20p0_546	gi|929382476|ref|XP_014101746.1|	PREDICTED: NADH dehydrogenase [ubiquinone] 1 subunit C2-like, partial [Bactrocera oleae]	--	--	dvi:Dvir_GJ19555	K03968	NDUFC2	NADH dehydrogenase (ubiquinone) 1 subunit C2	ko00190	Oxidative phosphorylation	--	--	--	--	--	C	ENOG410Y341	Accessory subunit of the mitochondrial membrane respiratory chain NADH dehydrogenase (Complex I), that is believed not to be involved in catalysis. Complex I functions in the transfer of electrons from NADH to the respiratory chain. The immediate electron acceptor for the enzyme is believed to be ubiquinone (By similarity)	--	--	--
i0_HQ_sampled12fd9_c374355_f4p0_501	gi|507143694|gb|AGM37865.1|	family 7 cellobiohydrolase [Chelura terebrans]	Q8NK02.1	RecName: Full=1,4-beta-D-glucan cellobiohydrolase B; AltName: Full=Beta-glucancellobiohydrolase B; AltName: Full=Exocellobiohydrolase B; AltName: Full=Exoglucanase B; Flags: Precursor	ani:AN0494.2	K01225	CBHA_B	cellulose 1,4-beta-cellobiosidase	ko00500	Starch and sucrose metabolism	--	--	--	--	--	G	ENOG41101KD	The biological conversion of cellulose to glucose generally requires three types of hydrolytic enzymes (1) Endoglucanases which cut internal beta-1,4-glucosidic bonds	Molecular Function: hydrolase activity, hydrolyzing O-glycosyl compounds (GO:0004553);|Biological Process: metabolic process (GO:0008152);	--	--
i0_HQ_sampled12fd9_c374356_f64p0_655	gi|751868543|ref|YP_009118046.1|	NADH dehydrogenase subunit 5 (mitochondrion) [Brachyuropus grewingkii]	P18932.4	RecName: Full=NADH-ubiquinone oxidoreductase chain 5; AltName: Full=NADH dehydrogenase subunit 5	mde:20358590	K03883	ND5	NADH-ubiquinone oxidoreductase chain 5	ko00190	Oxidative phosphorylation	--	--	--	--	--	C	COG1009	subunit l	Cellular Component: membrane (GO:0016020);	--	--
i0_HQ_sampled12fd9_c374357_f29p0_626	--	--	--	--	--	--	--	--	--	--	--	--	--	--	--	--	--	--	--	--	--
i0_HQ_sampled12fd9_c37435_f2p0_377	--	--	--	--	--	--	--	--	--	--	--	--	--	--	--	--	--	--	--	--	--
i0_HQ_sampled12fd9_c374364_f11p0_705	--	--	--	--	--	--	--	--	--	--	--	--	--	--	--	--	--	--	--	--	--
i0_HQ_sampled12fd9_c374367_f40p0_941	gi|269798963|gb|ACZ43781.1|	crustin 1, partial [Fenneropenaeus chinensis]	--	--	--	--	--	--	--	--	--	--	--	--	--	--	--	--	--	--	--
i0_HQ_sampled12fd9_c374373_f6p0_813	--	--	--	--	--	--	--	--	--	--	--	--	--	--	--	--	--	--	--	--	--
i0_HQ_sampled12fd9_c374374_f34p0_657	gi|295149386|gb|ADF81052.1|	vitellogenin-like protein precursor, partial [Gammarus fossarum]	Q9U572.1	RecName: Full=Hemolymph clottable protein; Flags: Precursor	--	--	--	--	--	--	--	--	--	--	--	--	--	--	--	--	--
i0_HQ_sampled12fd9_c374376_f3p0_661	--	--	--	--	--	--	--	--	--	--	--	--	--	--	--	--	--	--	--	--	--
i0_HQ_sampled12fd9_c374381_f14p0_609	gi|602632372|ref|XP_007423078.1|	PREDICTED: 60S ribosomal protein L18 [Python bivittatus]	P12001.2	RecName: Full=60S ribosomal protein L18	pbi:103057327	K02883	RP-L18e, RPL18	large subunit ribosomal protein L18e	ko03010	Ribosome	--	--	--	--	--	J	COG1727	Ribosomal protein	--	--	--
i0_HQ_sampled12fd9_c374388_f12p0_466	--	--	--	--	--	--	--	--	--	--	--	--	--	--	--	--	--	--	--	--	--
i0_HQ_sampled12fd9_c374394_f6p0_708	--	--	--	--	--	--	--	--	--	--	--	--	--	--	--	--	--	--	--	--	--
i0_HQ_sampled12fd9_c374395_f15p0_374	--	--	--	--	--	--	--	--	--	--	--	--	--	--	--	--	--	--	--	--	--
i0_HQ_sampled12fd9_c374396_f5p0_337	--	--	--	--	--	--	--	--	--	--	--	--	--	--	--	--	--	--	--	--	--
i0_HQ_sampled12fd9_c374398_f22p0_530	gi|1041111813|ref|XP_017279334.1|	PREDICTED: tubulin alpha chain [Kryptolebias marmoratus]	P30436.2	RecName: Full=Tubulin alpha chain; Contains: RecName: Full=Detyrosinated tubulin alpha chain	tru:101067763	K07374	TUBA	tubulin alpha	ko04540|ko04210|ko04145	Gap junction|Apoptosis|Phagosome	--	--	--	--	--	Z	COG5023	protein polymerization	--	--	--
i0_HQ_sampled12fd9_c374399_f4p0_462	--	--	--	--	--	--	--	--	--	--	--	--	--	--	--	--	--	--	--	--	--
i0_HQ_sampled12fd9_c374402_f32p0_459	--	--	--	--	--	--	--	--	--	--	--	--	--	--	--	--	--	--	--	--	--
i0_HQ_sampled12fd9_c374404_f6p0_731	--	--	--	--	--	--	--	--	--	--	--	--	--	--	--	--	--	--	--	--	--
i0_HQ_sampled12fd9_c374407_f18p0_646	--	--	--	--	--	--	--	--	--	--	--	--	--	--	--	--	--	--	--	--	--
i0_HQ_sampled12fd9_c374409_f10p0_331	--	--	--	--	--	--	--	--	--	--	--	--	--	--	--	--	--	--	--	--	--
i0_HQ_sampled12fd9_c374410_f23p0_324	--	--	--	--	--	--	--	--	--	--	--	--	--	--	--	--	--	--	--	--	--
i0_HQ_sampled12fd9_c374414_f12p0_635	--	--	--	--	--	--	--	--	--	--	--	--	--	--	--	--	--	--	--	--	--
i0_HQ_sampled12fd9_c374417_f3p0_537	--	--	--	--	--	--	--	--	--	--	--	--	--	--	--	--	--	--	--	--	--
i0_HQ_sampled12fd9_c374420_f77p0_664	gi|385258072|gb|AFI54986.1|	ferritin [Macrobrachium rosenbergii]	Q26061.1	RecName: Full=Ferritin	hst:105187670	K00522	FTH1	ferritin heavy chain	ko04978	Mineral absorption	--	--	--	--	--	P	COG1528	Stores iron in a soluble, non-toxic, readily available form. Important for iron homeostasis (By similarity)	Molecular Function: ferroxidase activity (GO:0004322);|Cellular Component: cell (GO:0005623);|Biological Process: iron ion transport (GO:0006826);|Biological Process: cellular iron ion homeostasis (GO:0006879);|Molecular Function: ferric iron binding (GO:0008199);|Biological Process: oxidation-reduction process (GO:0055114);	--	--
i0_HQ_sampled12fd9_c374422_f2p0_672	--	--	--	--	--	--	--	--	--	--	--	--	--	--	--	--	--	--	--	--	--
i0_HQ_sampled12fd9_c374427_f7p0_975	--	--	--	--	--	--	--	--	--	--	--	--	--	--	--	--	--	--	--	--	--
i0_HQ_sampled12fd9_c374428_f11p0_507	gi|157114043|ref|XP_001657955.1|	AAEL006698-PA [Aedes aegypti]	Q9GN74.1	RecName: Full=60S ribosomal protein L31	aag:AaeL_AAEL006698	K02910	RP-L31e, RPL31	large subunit ribosomal protein L31e	ko03010	Ribosome	--	--	--	--	--	J	COG2097	(ribosomal) protein	Cellular Component: intracellular ribonucleoprotein complex (GO:0030529);	--	--
i0_HQ_sampled12fd9_c374429_f4p0_465	--	--	--	--	--	--	--	--	--	--	--	--	--	--	--	--	--	--	--	--	--
i0_HQ_sampled12fd9_c374430_f2p0_493	--	--	--	--	--	--	--	--	--	--	--	--	--	--	--	--	--	--	--	--	--
i0_HQ_sampled12fd9_c374437_f10p0_387	--	--	--	--	--	--	--	--	--	--	--	--	--	--	--	--	--	--	--	--	--
i0_HQ_sampled12fd9_c374439_f6p0_916	gi|954412817|gb|KRY65154.1|	hypothetical protein T4A_8306 [Trichinella pseudospiralis]	--	--	--	--	--	--	--	--	--	--	--	--	--	S	ENOG410Y5UK	NA	--	--	--
i0_HQ_sampled12fd9_c374440_f2p0_436	--	--	--	--	--	--	--	--	--	--	--	--	--	--	--	--	--	--	--	--	--
i0_HQ_sampled12fd9_c374442_f3p0_845	--	--	--	--	--	--	--	--	--	--	--	--	--	--	--	--	--	--	--	--	--
i0_HQ_sampled12fd9_c374443_f2p0_381	--	--	--	--	--	--	--	--	--	--	--	--	--	--	--	--	--	--	--	--	--
i0_HQ_sampled12fd9_c374451_f3p0_339	--	--	--	--	--	--	--	--	--	--	--	--	--	--	--	--	--	--	--	--	--
i0_HQ_sampled12fd9_c374455_f27p0_543	--	--	--	--	--	--	--	--	--	--	--	--	--	--	--	--	--	--	--	--	--
i0_HQ_sampled12fd9_c374456_f11p0_720	--	--	--	--	--	--	--	--	--	--	--	--	--	--	--	--	--	--	--	--	--
i0_HQ_sampled12fd9_c374462_f12p0_673	--	--	--	--	--	--	--	--	--	--	--	--	--	--	--	--	--	--	--	--	--
i0_HQ_sampled12fd9_c374464_f3p0_578	--	--	--	--	--	--	--	--	--	--	--	--	--	--	--	--	--	--	--	PF01391.17	Collagen triple helix repeat (20 copies)
i0_HQ_sampled12fd9_c374467_f13p0_786	--	--	--	--	--	--	--	--	--	--	--	--	--	--	--	--	--	--	--	--	--
i0_HQ_sampled12fd9_c374469_f11p0_488	--	--	--	--	--	--	--	--	--	--	--	--	--	--	--	--	--	--	--	--	--
i0_HQ_sampled12fd9_c374477_f2p0_532	gi|682331622|gb|AIN36963.1|	M15 protein [Cherax quadricarinatus]	--	--	--	--	--	--	--	--	--	--	--	--	--	--	--	--	--	--	--
i0_HQ_sampled12fd9_c374478_f17p0_957	gi|1028668145|ref|XP_016662725.1|	PREDICTED: uncharacterized protein LOC100167295 isoform X3 [Acyrthosiphon pisum]	--	--	api:100167295	K19326	SYNE1	nesprin-1	--	--	--	--	--	--	--	--	--	--	--	--	--
i0_HQ_sampled12fd9_c374482_f4p0_790	gi|915667685|gb|KOC69463.1|	Coatomer subunit zeta-1 [Habropoda laboriosa]	P35604.2	RecName: Full=Coatomer subunit zeta-1; AltName: Full=Zeta-1-coat protein; Short=Zeta-1 COP	cfo:105258445	K20472	COPZ, RET3	coatomer subunit zeta	--	--	--	--	--	--	--	U	COG5541	vesicle-mediated transport	Biological Process: protein transport (GO:0015031);	--	--
i0_HQ_sampled12fd9_c374485_f2p0_450	--	--	--	--	--	--	--	--	--	--	--	--	--	--	--	--	--	--	--	--	--
i0_HQ_sampled12fd9_c374487_f18p0_252	gi|959241941|gb|ALR35018.1|	chymotrypsin, partial [Macrophthalmus japonicus]	P00771.2	RecName: Full=Brachyurin; AltName: Full=Collagenolytic protease	--	--	--	--	--	--	--	--	--	--	--	O	COG5640	protease	Molecular Function: serine-type endopeptidase activity (GO:0004252);|Biological Process: proteolysis (GO:0006508);	--	--
i0_HQ_sampled12fd9_c374489_f4p0_773	--	--	--	--	--	--	--	--	--	--	--	--	--	--	--	--	--	--	--	--	--
i0_HQ_sampled12fd9_c374492_f2p0_657	--	--	--	--	--	--	--	--	--	--	--	--	--	--	--	--	--	--	--	--	--
i0_HQ_sampled12fd9_c374499_f26p0_949	gi|184198734|gb|ACC76803.1|	Lit v 3 allergen myosin light chain [Litopenaeus vannamei]	Q1HPS0.1	RecName: Full=Myosin regulatory light chain 2; Short=MLC-2	--	--	--	--	--	--	KOG0031	Myosin regulatory light chain, EF-Hand protein superfamily	[Z]	CELLULAR PROCESSES AND SIGNALING	Cytoskeleton	DTZ	COG5126	Calcium-binding protein	--	--	--
i0_HQ_sampled12fd9_c374501_f15p0_729	gi|586963393|gb|AHK05984.1|	vitellogenin protein precursor 1, partial [Gammarus marinus]	--	--	--	--	--	--	--	--	--	--	--	--	--	--	--	--	--	--	--
i0_HQ_sampled12fd9_c374510_f10p0_779	--	--	--	--	--	--	--	--	--	--	--	--	--	--	--	--	--	--	--	--	--
i0_HQ_sampled12fd9_c374511_f6p0_529	--	--	--	--	--	--	--	--	--	--	--	--	--	--	--	--	--	--	--	--	--
i0_HQ_sampled12fd9_c374513_f2p0_267	--	--	--	--	--	--	--	--	--	--	--	--	--	--	--	--	--	--	--	--	--
i0_HQ_sampled12fd9_c374514_f13p0_509	--	--	--	--	--	--	--	--	--	--	--	--	--	--	--	--	--	--	--	--	--
i0_HQ_sampled12fd9_c374517_f2p0_849	--	--	--	--	--	--	--	--	--	--	--	--	--	--	--	--	--	--	--	--	--
i0_HQ_sampled12fd9_c374519_f4p0_572	--	--	--	--	--	--	--	--	--	--	--	--	--	--	--	--	--	--	--	--	--
i0_HQ_sampled12fd9_c374521_f87p0_441	gi|159145694|gb|ABW90384.1|	putative ribosomal protein S25, partial [Sipunculus nudus]	Q8ISN9.1	RecName: Full=40S ribosomal protein S25	nve:NEMVE_v1g190935	K02975	RP-S25e, RPS25	small subunit ribosomal protein S25e	ko03010	Ribosome	--	--	--	--	--	J	COG4901	Ribosomal protein S25	Cellular Component: ribosome (GO:0005840);	--	--
i0_HQ_sampled12fd9_c374523_f2p0_792	gi|1005947724|ref|XP_015782171.1|	PREDICTED: phosphate carrier protein, mitochondrial-like [Tetranychus urticae]	P40614.1	RecName: Full=Phosphate carrier protein, mitochondrial; Short=PTP; Flags: Precursor	aga:AgaP_AGAP013333	K15102	SLC25A3, PHC, PIC	solute carrier family 25 (mitochondrial phosphate transporter), member 3	--	--	KOG0767	Mitochondrial phosphate carrier protein	[C]	METABOLISM	Energy production and conversion	S	ENOG410XPST	Phosphate carrier protein	Cellular Component: integral component of membrane (GO:0016021);|Biological Process: transmembrane transport (GO:0055085);	--	--
i0_HQ_sampled12fd9_c374526_f11p0_960	gi|659099629|gb|AID60326.1|	stubble-1 [Nilaparvata lugens]	Q8BZ10.2	RecName: Full=Transmembrane protease serine 11G; AltName: Full=Serine protease DESC4; Contains: RecName: Full=Transmembrane protease serine 11G non-catalytic chain; Contains: RecName: Full=Transmembrane protease serine 11G catalytic chain; Flags: Precursor	--	--	--	--	--	--	--	--	--	--	--	O	COG5640	protease	Molecular Function: hydrolase activity (GO:0016787);	--	--
i0_HQ_sampled12fd9_c374527_f4p0_570	--	--	--	--	--	--	--	--	--	--	--	--	--	--	--	--	--	--	--	--	--
i0_HQ_sampled12fd9_c374529_f46p0_670	--	--	--	--	--	--	--	--	--	--	--	--	--	--	--	--	--	--	--	--	--
i0_HQ_sampled12fd9_c374531_f42p0_587	gi|817074385|ref|XP_012259379.1|	PREDICTED: 40S ribosomal protein S13 [Athalia rosae]	Q9WVH0.3	RecName: Full=40S ribosomal protein S13	oas:101115399	K02953	RP-S13e, RPS13	small subunit ribosomal protein S13e	ko03010	Ribosome	KOG0400	40S ribosomal protein S13	[J]	INFORMATION STORAGE AND PROCESSING	Translation, ribosomal structure and biogenesis	J	COG0184	Forms an intersubunit bridge (bridge B4) with the 23S rRNA of the 50S subunit in the ribosome (By similarity)	--	--	--
i0_HQ_sampled12fd9_c374533_f13p0_620	gi|443614325|gb|AGC96524.1|	70kD heat shock protein, partial [Scylla paramamosain]	P29844.2	RecName: Full=Heat shock 70 kDa protein cognate 3; AltName: Full=78 kDa glucose-regulated protein homolog; AltName: Full=GRP 78; AltName: Full=Heat shock protein cognate 72; Flags: Precursor	dan:Dana_GF20248	K09490	HSPA5, BIP	heat shock 70kDa protein 5	ko04918|ko04141|ko03060	Thyroid hormone synthesis|Protein processing in endoplasmic reticulum|Protein export	KOG0100	Molecular chaperones GRP78/BiP/KAR2, HSP70 superfamily	[O]	CELLULAR PROCESSES AND SIGNALING	Posttranslational modification, protein turnover, chaperones	O	COG0443	Heat shock protein	--	--	--
i0_HQ_sampled12fd9_c374535_f7p0_324	--	--	--	--	--	--	--	--	--	--	--	--	--	--	--	--	--	--	--	--	--
i0_HQ_sampled12fd9_c374537_f2p0_768	--	--	--	--	--	--	--	--	--	--	--	--	--	--	--	--	--	--	--	--	--
i0_HQ_sampled12fd9_c374541_f10p0_894	gi|364023551|gb|AEW46850.1|	seminal fluid protein CSSFP002 [Chilo suppressalis]	Q5QSK2.1	RecName: Full=Transmembrane protease serine 11G; AltName: Full=Serine protease DESC4; Contains: RecName: Full=Transmembrane protease serine 11G non-catalytic chain; Contains: RecName: Full=Transmembrane protease serine 11G catalytic chain; Flags: Precursor	--	--	--	--	--	--	--	--	--	--	--	O	COG5640	protease	Molecular Function: hydrolase activity (GO:0016787);	--	--
i0_HQ_sampled12fd9_c374549_f10p0_750	--	--	--	--	--	--	--	--	--	--	--	--	--	--	--	--	--	--	--	--	--
i0_HQ_sampled12fd9_c374550_f2p0_521	--	--	--	--	--	--	--	--	--	--	--	--	--	--	--	--	--	--	--	--	--
i0_HQ_sampled12fd9_c374552_f6p0_516	--	--	--	--	--	--	--	--	--	--	--	--	--	--	--	--	--	--	--	--	--
i0_HQ_sampled12fd9_c374554_f6p0_403	--	--	--	--	--	--	--	--	--	--	--	--	--	--	--	--	--	--	--	--	--
i0_HQ_sampled12fd9_c374557_f4p0_861	--	--	--	--	--	--	--	--	--	--	--	--	--	--	--	--	--	--	--	--	--
i0_HQ_sampled12fd9_c374560_f55p0_972	gi|766943030|gb|AJT34991.1|	masquerade-like protein [Procambarus clarkii]	Q402U7.1	RecName: Full=Serine protease 44; AltName: Full=Testis serine protease 4; Short=TESSP-4; AltName: Full=Testis-specific serine protease 4; Flags: Precursor	--	--	--	--	--	--	--	--	--	--	--	O	COG5640	protease	--	--	--
i0_HQ_sampled12fd9_c374562_f4p0_987	gi|149287190|gb|ABR23494.1|	mitochondrial import inner membrane translocase subunit Tim8-like protein [Ornithodoros parkeri]	Q9Y1A3.1	RecName: Full=Mitochondrial import inner membrane translocase subunit Tim8	dmo:Dmoj_GI15714	K17780	TIM8	mitochondrial import inner membrane translocase subunit TIM8	--	--	--	--	--	--	--	O	ENOG41126D5	mitochondrial intermembrane chaperone that participates in the import and insertion of some multi-pass transmembrane proteins into the mitochondrial inner membrane. Also required for the transfer of beta-barrel precursors from the TOM complex to the sorting and assembly machinery (SAM complex) of the outer membrane. Acts as a chaperone-like protein that protects the hydrophobic precursors from ag…	Cellular Component: mitochondrion (GO:0005739);|Biological Process: protein transport (GO:0015031);|Molecular Function: metal ion binding (GO:0046872);	--	--
i0_HQ_sampled12fd9_c374566_f2p0_452	--	--	--	--	--	--	--	--	--	--	--	--	--	--	--	--	--	--	--	--	--
i0_HQ_sampled12fd9_c374567_f2p0_714	--	--	--	--	--	--	--	--	--	--	--	--	--	--	--	--	--	--	--	--	--
i0_HQ_sampled12fd9_c374570_f3p0_698	--	--	--	--	--	--	--	--	--	--	--	--	--	--	--	--	--	--	--	--	--
i0_HQ_sampled12fd9_c374571_f3p0_869	--	--	--	--	--	--	--	--	--	--	--	--	--	--	--	--	--	--	--	--	--
i0_HQ_sampled12fd9_c374575_f3p0_324	gi|674953242|emb|CDX80274.1|	BnaC09g34680D [Brassica napus]	P53501.1	RecName: Full=Actin-57B; Flags: Precursor	dsi:Dsimw501_GD11548	K05692	ACTB_G1	actin beta/gamma 1	ko04145|ko04520|ko04670|ko04015|ko04390|ko04611|ko04391|ko04510|ko04745|ko04810|ko04530|ko04919|ko04210|ko04921	Phagosome|Adherens junction|Leukocyte transendothelial migration|Rap1 signaling pathway|Hippo signaling pathway|Platelet activation|Hippo signaling pathway - fly|Focal adhesion|Phototransduction - fly|Regulation of actin cytoskeleton|Tight junction|Thyroid hormone signaling pathway|Apoptosis|Oxytocin signaling pathway	KOG0676	Actin and related proteins	[Z]	CELLULAR PROCESSES AND SIGNALING	Cytoskeleton	Z	COG5277	Actin-related protein	Molecular Function: nucleotide binding (GO:0000166);	--	--
i0_HQ_sampled12fd9_c374578_f7p0_719	gi|328796228|gb|AEB40303.1|	mitochondrial ATP synthase delta subunit precursor [Litopenaeus vannamei]	P05630.2	RecName: Full=ATP synthase subunit delta, mitochondrial; AltName: Full=F-ATPase delta subunit; Flags: Precursor	cqu:CpipJ_CPIJ012335	K02134	ATPeF1D, ATP5D, ATP16	F-type H+-transporting ATPase subunit delta	ko00190	Oxidative phosphorylation	--	--	--	--	--	C	COG0355	Produces ATP from ADP in the presence of a proton gradient across the membrane (By similarity)	Molecular Function: hydrogen ion transmembrane transporter activity (GO:0015078);|Molecular Function: cation-transporting ATPase activity (GO:0019829);|Molecular Function: ATPase activity, coupled to transmembrane movement of ions, rotational mechanism (GO:0044769);	--	--
i0_HQ_sampled12fd9_c374579_f23p0_555	gi|169931080|gb|ACB05778.1|	cuticular protein [Artemia franciscana]	--	--	--	--	--	--	--	--	--	--	--	--	--	S	ENOG4111Y42	Cuticular protein	--	--	--
i0_HQ_sampled12fd9_c374580_f50p0_839	--	--	--	--	--	--	--	--	--	--	--	--	--	--	--	--	--	--	--	--	--
i0_HQ_sampled12fd9_c374587_f2p0_967	--	--	--	--	--	--	--	--	--	--	--	--	--	--	--	--	--	--	--	--	--
i0_HQ_sampled12fd9_c374588_f5p0_628	--	--	--	--	--	--	--	--	--	--	--	--	--	--	--	--	--	--	--	--	--
i0_HQ_sampled12fd9_c374591_f3p0_509	--	--	--	--	--	--	--	--	--	--	--	--	--	--	--	--	--	--	--	--	--
i0_HQ_sampled12fd9_c374593_f2p0_372	--	--	--	--	--	--	--	--	--	--	--	--	--	--	--	--	--	--	--	--	--
i0_HQ_sampled12fd9_c374596_f2p0_893	--	--	--	--	--	--	--	--	--	--	--	--	--	--	--	--	--	--	--	--	--
i0_HQ_sampled12fd9_c374600_f48p0_939	--	--	--	--	--	--	--	--	--	--	--	--	--	--	--	--	--	--	--	--	--
i0_HQ_sampled12fd9_c374601_f17p0_238	--	--	--	--	--	--	--	--	--	--	--	--	--	--	--	--	--	--	--	--	--
i0_HQ_sampled12fd9_c374605_f12p0_489	--	--	--	--	--	--	--	--	--	--	--	--	--	--	--	--	--	--	--	--	--
i0_HQ_sampled12fd9_c374606_f12p0_897	--	--	--	--	--	--	--	--	--	--	--	--	--	--	--	--	--	--	--	--	--
i0_HQ_sampled12fd9_c374607_f10p0_987	--	--	--	--	--	--	--	--	--	--	--	--	--	--	--	--	--	--	--	--	--
i0_HQ_sampled12fd9_c374608_f3p0_576	--	--	--	--	--	--	--	--	--	--	--	--	--	--	--	--	--	--	--	--	--
i0_HQ_sampled12fd9_c374616_f3p0_431	--	--	--	--	--	--	--	--	--	--	--	--	--	--	--	--	--	--	--	--	--
i0_HQ_sampled12fd9_c374617_f4p0_491	--	--	--	--	--	--	--	--	--	--	--	--	--	--	--	--	--	--	--	--	--
i0_HQ_sampled12fd9_c374621_f6p0_612	--	--	--	--	--	--	--	--	--	--	--	--	--	--	--	--	--	--	--	--	--
i0_HQ_sampled12fd9_c374622_f2p0_373	--	--	--	--	--	--	--	--	--	--	--	--	--	--	--	--	--	--	--	--	--
i0_HQ_sampled12fd9_c374628_f14p0_459	--	--	--	--	--	--	--	--	--	--	--	--	--	--	--	--	--	--	--	--	--
i0_HQ_sampled12fd9_c374629_f3p0_394	--	--	--	--	--	--	--	--	--	--	--	--	--	--	--	--	--	--	--	--	--
i0_HQ_sampled12fd9_c374631_f3p0_379	--	--	--	--	--	--	--	--	--	--	--	--	--	--	--	--	--	--	--	--	--
i0_HQ_sampled12fd9_c374632_f11p0_988	gi|239505087|gb|ACR78689.1|	hypothetical cuticle protein, partial [Rimicaris exoculata]	P81578.1	RecName: Full=Cuticle protein AM1239; Short=CPAM1239	--	--	--	--	--	--	--	--	--	--	--	--	--	--	Molecular Function: structural constituent of cuticle (GO:0042302);	--	--
i0_HQ_sampled12fd9_c374639_f2p0_563	--	--	--	--	--	--	--	--	--	--	--	--	--	--	--	--	--	--	--	--	--
i0_HQ_sampled12fd9_c374648_f16p0_961	gi|432849647|ref|XP_004066605.1|	PREDICTED: ATP synthase subunit beta, mitochondrial [Oryzias latipes]	Q9PTY0.1	RecName: Full=ATP synthase subunit beta, mitochondrial; Flags: Precursor	ola:101164037	K02133	ATPeF1B, ATP5B, ATP2	F-type H+-transporting ATPase subunit beta	ko00190	Oxidative phosphorylation	--	--	--	--	--	C	COG0055	Produces ATP from ADP in the presence of a proton gradient across the membrane. The catalytic sites are hosted primarily by the beta subunits (By similarity)	Molecular Function: ATP binding (GO:0005524);|Biological Process: ATP synthesis coupled proton transport (GO:0015986);|Biological Process: ATP hydrolysis coupled proton transport (GO:0015991);|Cellular Component: proton-transporting ATP synthase complex, catalytic core F(1) (GO:0045261);|Molecular Function: proton-transporting ATP synthase activity, rotational mechanism (GO:0046933);	--	--
i0_HQ_sampled12fd9_c374651_f15p0_914	gi|682331622|gb|AIN36963.1|	M15 protein [Cherax quadricarinatus]	O02387.1	RecName: Full=Larval cuticle protein LCP-17; Flags: Precursor	--	--	--	--	--	--	--	--	--	--	--	S	ENOG4110SY1	Cuticular protein RR-1 motif 12	--	--	--
i0_HQ_sampled12fd9_c374652_f5p0_521	--	--	--	--	--	--	--	--	--	--	--	--	--	--	--	--	--	--	--	--	--
i0_HQ_sampled12fd9_c374653_f4p0_955	--	--	--	--	--	--	--	--	--	--	--	--	--	--	--	--	--	--	--	--	--
i0_HQ_sampled12fd9_c374654_f3p0_994	gi|594191368|gb|AHL84105.1|	F0-ATP synthase b-chain [Litopenaeus vannamei]	Q94516.2	RecName: Full=ATP synthase subunit b, mitochondrial; Short=ATPase subunit b; AltName: Full=FO-ATP synthase subunit b; Flags: Precursor	pxy:105386388	K02127	ATPeF0B, ATP5F1, ATP4	F-type H+-transporting ATPase subunit b	ko00190	Oxidative phosphorylation	--	--	--	--	--	I	ENOG410ZUQH	atp synthase	--	--	--
i0_HQ_sampled12fd9_c374655_f2p0_784	--	--	--	--	--	--	--	--	--	--	--	--	--	--	--	--	--	--	--	--	--
i0_HQ_sampled12fd9_c374656_f3p0_946	gi|108773740|gb|ABG11961.1|	tail muscle elongation factor 1 gamma [Procambarus clarkii]	P12261.3	RecName: Full=Elongation factor 1-gamma; Short=EF-1-gamma; AltName: Full=eEF-1B gamma	--	--	--	--	--	--	--	--	--	--	--	O	COG0625	glutathione Stransferase	Biological Process: translation (GO:0006412);	--	--
i0_HQ_sampled12fd9_c374661_f2p0_774	--	--	--	--	--	--	--	--	--	--	--	--	--	--	--	--	--	--	--	--	--
i0_HQ_sampled12fd9_c374662_f12p0_822	gi|375153528|gb|AFA36654.1|	elongation factor 1-delta protein [Eriocheir sinensis]	Q9VL18.1	RecName: Full=Probable elongation factor 1-delta; Short=EF-1-delta	--	--	--	--	--	--	--	--	--	--	--	J	COG2092	Promotes the exchange of GDP for GTP in EF-1-alpha GDP, thus allowing the regeneration of EF-1-alpha GTP that could then be used to form the ternary complex EF-1-alpha GTP AAtRNA (By similarity)	--	--	--
i0_HQ_sampled12fd9_c374665_f5p0_826	--	--	--	--	--	--	--	--	--	--	--	--	--	--	--	--	--	--	--	--	--
i0_HQ_sampled12fd9_c374666_f2p0_562	--	--	--	--	--	--	--	--	--	--	--	--	--	--	--	--	--	--	--	--	--
i0_HQ_sampled12fd9_c374667_f3p0_692	--	--	--	--	--	--	--	--	--	--	--	--	--	--	--	--	--	--	--	--	--
i0_HQ_sampled12fd9_c374668_f5p0_438	--	--	--	--	--	--	--	--	--	--	--	--	--	--	--	--	--	--	--	--	--
i0_HQ_sampled12fd9_c374669_f12p0_464	--	--	--	--	--	--	--	--	--	--	--	--	--	--	--	--	--	--	--	--	--
i0_HQ_sampled12fd9_c374673_f10p0_314	--	--	--	--	--	--	--	--	--	--	--	--	--	--	--	--	--	--	--	--	--
i0_HQ_sampled12fd9_c374674_f10p0_892	--	--	--	--	--	--	--	--	--	--	--	--	--	--	--	--	--	--	--	--	--
i0_HQ_sampled12fd9_c374677_f6p0_688	--	--	--	--	--	--	--	--	--	--	--	--	--	--	--	--	--	--	--	--	--
i0_HQ_sampled12fd9_c374684_f52p0_794	gi|411595986|gb|AFW19996.1|	mitochondrial cytochrome c oxidase subunit Va [Litopenaeus vannamei]	B0VYY0.1	RecName: Full=Cytochrome c oxidase subunit 5A, mitochondrial; AltName: Full=Cytochrome c oxidase polypeptide Va; Flags: Precursor	aec:105151513	K02264	COX5A	cytochrome c oxidase subunit 5a	ko00190|ko04260	Oxidative phosphorylation|Cardiac muscle contraction	--	--	--	--	--	O	ENOG4111MPD	cytoChrome c oxidase subunit	Molecular Function: cytochrome-c oxidase activity (GO:0004129);|Cellular Component: mitochondrial inner membrane (GO:0005743);|Biological Process: oxidation-reduction process (GO:0055114);|Biological Process: hydrogen ion transmembrane transport (GO:1902600);	--	--
i0_HQ_sampled12fd9_c374685_f2p0_545	--	--	--	--	--	--	--	--	--	--	--	--	--	--	--	--	--	--	--	--	--
i0_HQ_sampled12fd9_c374686_f11p0_910	gi|283854611|gb|ADB44901.1|	DEAD(Asp-Glu-Ala-Asp) box polypeptide 39 [Macrobrachium nipponense]	Q27268.1	RecName: Full=ATP-dependent RNA helicase WM6; Short=DEAD box protein UAP56; Short=Dmrnahel; AltName: Full=HEL/UAP56	crg:105319209	K12812	UAP56, BAT1, SUB2	ATP-dependent RNA helicase UAP56/SUB2	ko03040|ko03015|ko03013	Spliceosome|mRNA surveillance pathway|RNA transport	KOG0329	ATP-dependent RNA helicase	[A]	INFORMATION STORAGE AND PROCESSING	RNA processing and modification	L	COG0513	purine NTP-dependent helicase activity	Molecular Function: nucleic acid binding (GO:0003676);|Molecular Function: helicase activity (GO:0004386);|Molecular Function: ATP binding (GO:0005524);	--	--
i0_HQ_sampled12fd9_c374687_f32p0_506	gi|1040080587|gb|OBS57721.1|	hypothetical protein A6R68_11153 [Neotoma lepida]	P17078.3	RecName: Full=60S ribosomal protein L35	phd:102333597	K02918	RP-L35e, RPL35	large subunit ribosomal protein L35e	ko03010	Ribosome	--	--	--	--	--	J	COG0255	50s ribosomal protein l29	--	--	--
i0_HQ_sampled12fd9_c374688_f16p0_577	--	--	--	--	--	--	--	--	--	--	--	--	--	--	--	--	--	--	--	--	--
i0_HQ_sampled12fd9_c374689_f62p0_881	--	--	--	--	--	--	--	--	--	--	--	--	--	--	--	--	--	--	--	--	--
i0_HQ_sampled12fd9_c374691_f6p0_788	gi|672816928|gb|KFH61838.1|	hypothetical protein MVEG_12346 [Mortierella verticillata NRRL 6337]	Q9UI42.2	RecName: Full=Carboxypeptidase A4; AltName: Full=Carboxypeptidase A3; Flags: Precursor	tup:102492627	K08779	CPA1	carboxypeptidase A1	ko04974|ko04972	Protein digestion and absorption|Pancreatic secretion	--	--	--	--	--	E	COG2866	metallocarboxypeptidase activity	--	--	--
i0_HQ_sampled12fd9_c374694_f52p0_727	gi|568249601|gb|ETN59397.1|	60S ribosomal protein L9 [Anopheles darlingi]	P50882.2	RecName: Full=60S ribosomal protein L9	aag:AaeL_AAEL007699	K02940	RP-L9e, RPL9	large subunit ribosomal protein L9e	ko03010	Ribosome	--	--	--	--	--	J	COG0097	This protein binds to the 23S rRNA, and is important in its secondary structure. It is located near the subunit interface in the base of the L7 L12 stalk, and near the tRNA binding site of the peptidyltransferase center (By similarity)	--	--	--
i0_HQ_sampled12fd9_c374695_f2p0_950	--	--	--	--	--	--	--	--	--	--	--	--	--	--	--	--	--	--	--	--	--
i0_HQ_sampled12fd9_c374697_f16p0_861	--	--	--	--	--	--	--	--	--	--	--	--	--	--	--	--	--	--	--	--	--
i0_HQ_sampled12fd9_c374698_f15p0_294	--	--	--	--	--	--	--	--	--	--	--	--	--	--	--	--	--	--	--	--	--
i0_HQ_sampled12fd9_c374701_f11p0_517	gi|284027776|gb|ADB66711.1|	trypsin 1a [Panulirus argus]	P00765.1	RecName: Full=Trypsin-1; AltName: Full=Trypsin I	tca:655678	K01312	PRSS1_2_3	trypsin	ko04974|ko04080|ko04972	Protein digestion and absorption|Neuroactive ligand-receptor interaction|Pancreatic secretion	--	--	--	--	--	O	COG5640	protease	Molecular Function: serine-type endopeptidase activity (GO:0004252);|Biological Process: proteolysis (GO:0006508);	--	--
i0_HQ_sampled12fd9_c374702_f47p0_804	--	--	--	--	--	--	--	--	--	--	--	--	--	--	--	--	--	--	--	--	--
i0_HQ_sampled12fd9_c374705_f34p0_454	--	--	--	--	--	--	--	--	--	--	--	--	--	--	--	--	--	--	--	--	--
i0_HQ_sampled12fd9_c374707_f36p0_473	--	--	--	--	--	--	--	--	--	--	--	--	--	--	--	--	--	--	--	--	--
i0_HQ_sampled12fd9_c374708_f49p0_928	--	--	--	--	--	--	--	--	--	--	--	--	--	--	--	--	--	--	--	--	--
i0_HQ_sampled12fd9_c374712_f102p0_892	--	--	--	--	--	--	--	--	--	--	--	--	--	--	--	--	--	--	--	--	--
i0_HQ_sampled12fd9_c374715_f27p0_365	--	--	--	--	--	--	--	--	--	--	--	--	--	--	--	--	--	--	--	--	--
i0_HQ_sampled12fd9_c374716_f17p0_311	--	--	--	--	--	--	--	--	--	--	--	--	--	--	--	--	--	--	--	--	--
i0_HQ_sampled12fd9_c374717_f82p0_521	gi|298162774|gb|ADI59751.1|	early cuticle protein 3 [Callinectes sapidus]	O02387.1	RecName: Full=Larval cuticle protein LCP-17; Flags: Precursor	--	--	--	--	--	--	--	--	--	--	--	S	ENOG4110NKJ	Insect cuticle protein	--	--	--
i0_HQ_sampled12fd9_c374718_f50p0_597	gi|939675059|ref|XP_008555416.2|	PREDICTED: actin-85C [Microplitis demolitor]	P07837.1	RecName: Full=Actin, muscle-type A2; Flags: Precursor	rro:104675775	K05692	ACTB_G1	actin beta/gamma 1	ko04145|ko04520|ko04670|ko04015|ko04390|ko04611|ko04391|ko04510|ko04745|ko04810|ko04530|ko04919|ko04210|ko04921	Phagosome|Adherens junction|Leukocyte transendothelial migration|Rap1 signaling pathway|Hippo signaling pathway|Platelet activation|Hippo signaling pathway - fly|Focal adhesion|Phototransduction - fly|Regulation of actin cytoskeleton|Tight junction|Thyroid hormone signaling pathway|Apoptosis|Oxytocin signaling pathway	KOG0676	Actin and related proteins	[Z]	CELLULAR PROCESSES AND SIGNALING	Cytoskeleton	Z	COG5277	Actin-related protein	--	--	--
i0_HQ_sampled12fd9_c374719_f2p0_456	--	--	--	--	--	--	--	--	--	--	--	--	--	--	--	--	--	--	--	--	--
i0_HQ_sampled12fd9_c374720_f20p0_715	--	--	--	--	--	--	--	--	--	--	--	--	--	--	--	--	--	--	--	--	--
i0_HQ_sampled12fd9_c374721_f10p0_495	--	--	--	--	--	--	--	--	--	--	--	--	--	--	--	--	--	--	--	--	--
i0_HQ_sampled12fd9_c374722_f6p0_987	--	--	--	--	--	--	--	--	--	--	--	--	--	--	--	--	--	--	--	--	--
i0_HQ_sampled12fd9_c374724_f5p0_860	gi|453073538|gb|AGG22607.1|	mitochondrial cytochrome c oxidase subunit IV [Locusta migratoria]	P80971.2	RecName: Full=Cytochrome c oxidase subunit 4 isoform 2, mitochondrial; AltName: Full=Cytochrome c oxidase subunit IV isoform 2; Short=COX IV-2; Flags: Precursor	bmor:780848	K02263	COX4	cytochrome c oxidase subunit 4	ko00190|ko04260	Oxidative phosphorylation|Cardiac muscle contraction	--	--	--	--	--	O	ENOG4111T97	Cytochrome c oxidase subunit	Molecular Function: cytochrome-c oxidase activity (GO:0004129);|Cellular Component: integral component of membrane (GO:0016021);|Biological Process: hydrogen ion transmembrane transport (GO:1902600);	--	--
i0_HQ_sampled12fd9_c374725_f2p0_946	--	--	--	--	--	--	--	--	--	--	--	--	--	--	--	--	--	--	--	--	--
i0_HQ_sampled12fd9_c374728_f5p0_780	--	--	--	--	--	--	--	--	--	--	--	--	--	--	--	--	--	--	--	--	--
i0_HQ_sampled12fd9_c374734_f13p0_784	--	--	--	--	--	--	--	--	--	--	--	--	--	--	--	--	--	--	--	--	--
i0_HQ_sampled12fd9_c374739_f4p0_267	--	--	--	--	--	--	--	--	--	--	--	--	--	--	--	--	--	--	--	--	--
i0_HQ_sampled12fd9_c374743_f34p0_711	--	--	--	--	--	--	--	--	--	--	--	--	--	--	--	--	--	--	--	--	--
i0_HQ_sampled12fd9_c374745_f2p0_396	--	--	--	--	--	--	--	--	--	--	--	--	--	--	--	--	--	--	--	--	--
i0_HQ_sampled12fd9_c374746_f13p0_260	--	--	--	--	--	--	--	--	--	--	--	--	--	--	--	--	--	--	--	--	--
i0_HQ_sampled12fd9_c374747_f7p0_701	--	--	--	--	--	--	--	--	--	--	--	--	--	--	--	--	--	--	--	--	--
i0_HQ_sampled12fd9_c374748_f16p0_711	--	--	--	--	--	--	--	--	--	--	--	--	--	--	--	--	--	--	--	--	--
i0_HQ_sampled12fd9_c374750_f20p0_237	--	--	--	--	--	--	--	--	--	--	--	--	--	--	--	--	--	--	--	--	--
i0_HQ_sampled12fd9_c374755_f17p0_396	--	--	--	--	--	--	--	--	--	--	--	--	--	--	--	--	--	--	--	--	--
i0_HQ_sampled12fd9_c374756_f12p0_262	--	--	--	--	--	--	--	--	--	--	--	--	--	--	--	--	--	--	--	--	--
i0_HQ_sampled12fd9_c374757_f2p0_820	--	--	--	--	--	--	--	--	--	--	--	--	--	--	--	--	--	--	--	--	--
i0_HQ_sampled12fd9_c374760_f7p0_703	--	--	--	--	--	--	--	--	--	--	--	--	--	--	--	--	--	--	--	--	--
i0_HQ_sampled12fd9_c374761_f18p0_586	--	--	--	--	--	--	--	--	--	--	--	--	--	--	--	--	--	--	--	--	--
i0_HQ_sampled12fd9_c374765_f34p0_452	gi|190014502|emb|CAQ60115.1|	putative glyceraldehyde-3-phosphate dehydrogenase [Gammarus locusta]	P56649.1	RecName: Full=Glyceraldehyde-3-phosphate dehydrogenase; Short=GAPDH	bvg:104906366	K00134	GAPDH, gapA	glyceraldehyde 3-phosphate dehydrogenase	ko00710|ko04066|ko01200|ko01230|ko00010	Carbon fixation in photosynthetic organisms|HIF-1 signaling pathway|Carbon metabolism|Biosynthesis of amino acids|Glycolysis / Gluconeogenesis	KOG0657	Glyceraldehyde 3-phosphate dehydrogenase	[G]	METABOLISM	Carbohydrate transport and metabolism	G	COG0057	glyceraldehyde3phosphate dehydrogenase	Molecular Function: glyceraldehyde-3-phosphate dehydrogenase (NAD+) (phosphorylating) activity (GO:0004365);|Biological Process: glucose metabolic process (GO:0006006);|Biological Process: glycolytic process (GO:0006096);|Molecular Function: NADP binding (GO:0050661);|Molecular Function: NAD binding (GO:0051287);|Biological Process: oxidation-reduction process (GO:0055114);	--	--
i0_HQ_sampled12fd9_c374766_f13p0_322	--	--	--	--	--	--	--	--	--	--	--	--	--	--	--	--	--	--	--	--	--
i0_HQ_sampled12fd9_c374767_f67p0_999	gi|25453074|sp|Q9NH49.1|KARG_CALSI	RecName: Full=Arginine kinase; Short=AK	Q9NH49.1	RecName: Full=Arginine kinase; Short=AK	aag:AaeL_AAEL009185	K00933	E2.7.3.2	creatine kinase	ko00330	Arginine and proline metabolism	--	--	--	--	--	E	COG3869	ATP guanido phosphotransferase	Molecular Function: arginine kinase activity (GO:0004054);|Molecular Function: ATP binding (GO:0005524);|Biological Process: phosphorylation (GO:0016310);	--	--
i0_HQ_sampled12fd9_c374769_f37p0_519	--	--	--	--	--	--	--	--	--	--	--	--	--	--	--	--	--	--	--	--	--
i0_HQ_sampled12fd9_c374775_f31p0_716	--	--	--	--	--	--	--	--	--	--	--	--	--	--	--	--	--	--	--	--	--
i0_HQ_sampled12fd9_c374777_f73p0_377	gi|942347434|gb|JAN55648.1|	60S ribosomal protein L37a [Daphnia magna]	Q9VMU4.3	RecName: Full=60S ribosomal protein L37a	mis:MICPUN_92616	K02921	RP-L37Ae, RPL37A	large subunit ribosomal protein L37Ae	ko03010	Ribosome	KOG0402	60S ribosomal protein L37	[J]	INFORMATION STORAGE AND PROCESSING	Translation, ribosomal structure and biogenesis	J	COG1997	Ribosomal protein	--	--	--
i0_HQ_sampled12fd9_c374778_f5p0_913	gi|3907620|gb|AAC78681.1|	actin 1 [Penaeus monodon]	P45887.1	RecName: Full=Actin-5, muscle-specific; Flags: Precursor	rro:104675775	K05692	ACTB_G1	actin beta/gamma 1	ko04145|ko04520|ko04670|ko04015|ko04390|ko04611|ko04391|ko04510|ko04745|ko04810|ko04530|ko04919|ko04210|ko04921	Phagosome|Adherens junction|Leukocyte transendothelial migration|Rap1 signaling pathway|Hippo signaling pathway|Platelet activation|Hippo signaling pathway - fly|Focal adhesion|Phototransduction - fly|Regulation of actin cytoskeleton|Tight junction|Thyroid hormone signaling pathway|Apoptosis|Oxytocin signaling pathway	KOG0676	Actin and related proteins	[Z]	CELLULAR PROCESSES AND SIGNALING	Cytoskeleton	Z	COG5277	Actin-related protein	Molecular Function: ATP binding (GO:0005524);	--	--
i0_HQ_sampled12fd9_c374781_f15p0_776	--	--	--	--	--	--	--	--	--	--	--	--	--	--	--	--	--	--	--	--	--
i0_HQ_sampled12fd9_c374782_f42p0_649	--	--	--	--	--	--	--	--	--	--	--	--	--	--	--	--	--	--	--	--	--
i0_HQ_sampled12fd9_c374783_f3p0_600	--	--	--	--	--	--	--	--	--	--	--	--	--	--	--	--	--	--	--	--	--
i0_HQ_sampled12fd9_c374787_f34p0_707	--	--	--	--	--	--	--	--	--	--	--	--	--	--	--	--	--	--	--	--	--
i0_HQ_sampled12fd9_c374788_f30p0_391	--	--	--	--	--	--	--	--	--	--	--	--	--	--	--	--	--	--	--	--	--
i0_HQ_sampled12fd9_c374790_f143p0_736	gi|333441022|gb|AEF32710.1|	translationally controlled tumor protein [Eriocheir sinensis]	Q5MIP6.1	RecName: Full=Translationally-controlled tumor protein homolog; Short=TCTP	--	--	--	--	--	--	--	--	--	--	--	S	ENOG4111FVP	tumor protein	--	--	--
i0_HQ_sampled12fd9_c374791_f12p0_272	--	--	--	--	--	--	--	--	--	--	--	--	--	--	--	--	--	--	--	--	--
i0_HQ_sampled12fd9_c374792_f42p0_687	--	--	--	--	--	--	--	--	--	--	--	--	--	--	--	--	--	--	--	--	--
i0_HQ_sampled12fd9_c374793_f27p0_386	--	--	--	--	--	--	--	--	--	--	--	--	--	--	--	--	--	--	--	--	--
i0_HQ_sampled12fd9_c374794_f11p0_938	--	--	--	--	--	--	--	--	--	--	--	--	--	--	--	--	--	--	--	--	--
i0_HQ_sampled12fd9_c374795_f3p0_836	--	--	--	--	--	--	--	--	--	--	--	--	--	--	--	--	--	--	--	--	--
i0_HQ_sampled12fd9_c374796_f78p0_840	gi|646716106|gb|KDR19493.1|	Cytochrome c oxidase subunit 7A-related protein, mitochondrial [Zootermopsis nevadensis]	Q9VHS2.1	RecName: Full=Cytochrome c oxidase subunit 7A, mitochondrial; AltName: Full=Cytochrome c oxidase subunit VIIa; Flags: Precursor	tca:660325	K02270	COX7A	cytochrome c oxidase subunit 7a	ko00190|ko04260	Oxidative phosphorylation|Cardiac muscle contraction	--	--	--	--	--	--	--	--	--	--	--
i0_HQ_sampled12fd9_c374797_f66p0_503	gi|768425080|ref|XP_011553522.1|	PREDICTED: polyserase-2-like [Plutella xylostella]	Q8SQ23.1	RecName: Full=Tissue-type plasminogen activator; Short=t-PA; Short=t-plasminogen activator; Short=tPA; Contains: RecName: Full=Tissue-type plasminogen activator chain A; Contains: RecName: Full=Tissue-type plasminogen activator chain B; Flags: Precursor	--	--	--	--	--	--	--	--	--	--	--	O	COG5640	protease	--	--	--
i0_HQ_sampled12fd9_c374799_f72p0_921	gi|83939666|gb|ABC48600.1|	ribosomal protein L8 [Litopenaeus vannamei]	P41569.1	RecName: Full=60S ribosomal protein L8	cqu:CpipJ_CPIJ000162	K02938	RP-L8e, RPL8	large subunit ribosomal protein L8e	ko03010	Ribosome	--	--	--	--	--	J	COG0090	One of the primary rRNA binding proteins. Required for association of the 30S and 50S subunits to form the 70S ribosome, for tRNA binding and peptide bond formation. It has been suggested to have peptidyltransferase activity	Molecular Function: structural constituent of ribosome (GO:0003735);|Cellular Component: ribosome (GO:0005840);|Biological Process: translation (GO:0006412);	--	--
i0_HQ_sampled12fd9_c374802_f10p0_349	--	--	--	--	--	--	--	--	--	--	--	--	--	--	--	--	--	--	--	--	--
i0_HQ_sampled12fd9_c374806_f2p0_876	--	--	--	--	--	--	--	--	--	--	--	--	--	--	--	--	--	--	--	--	--
i0_HQ_sampled12fd9_c374807_f18p0_390	--	--	--	--	--	--	--	--	--	--	--	--	--	--	--	--	--	--	--	--	--
i0_HQ_sampled12fd9_c374811_f4p0_306	--	--	--	--	--	--	--	--	--	--	--	--	--	--	--	--	--	--	--	--	--
i0_HQ_sampled12fd9_c374812_f86p0_963	--	--	--	--	--	--	--	--	--	--	--	--	--	--	--	--	--	--	--	--	--
i0_HQ_sampled12fd9_c374821_f21p0_665	--	--	--	--	--	--	--	--	--	--	--	--	--	--	--	--	--	--	--	--	--
i0_HQ_sampled12fd9_c374822_f15p0_989	gi|10304437|gb|AAG16253.1|AF300705_1	beta-actin [Litopenaeus vannamei]	P18603.1	RecName: Full=Actin, clone 403; Flags: Precursor	tca:659219	K05692	ACTB_G1	actin beta/gamma 1	ko04145|ko04520|ko04670|ko04015|ko04390|ko04611|ko04391|ko04510|ko04745|ko04810|ko04530|ko04919|ko04210|ko04921	Phagosome|Adherens junction|Leukocyte transendothelial migration|Rap1 signaling pathway|Hippo signaling pathway|Platelet activation|Hippo signaling pathway - fly|Focal adhesion|Phototransduction - fly|Regulation of actin cytoskeleton|Tight junction|Thyroid hormone signaling pathway|Apoptosis|Oxytocin signaling pathway	KOG0676	Actin and related proteins	[Z]	CELLULAR PROCESSES AND SIGNALING	Cytoskeleton	Z	COG5277	Actin-related protein	Molecular Function: ATP binding (GO:0005524);	--	--
i0_HQ_sampled12fd9_c374824_f55p0_638	--	--	--	--	--	--	--	--	--	--	--	--	--	--	--	--	--	--	--	--	--
i0_HQ_sampled12fd9_c374827_f75p0_828	gi|385100007|ref|YP_006234450.1|	ND4 gene product (mitochondrion) [Gammarus duebeni]	P07707.1	RecName: Full=NADH-ubiquinone oxidoreductase chain 4; AltName: Full=NADH dehydrogenase subunit 4	mde:20358588	K03881	ND4	NADH-ubiquinone oxidoreductase chain 4	ko00190	Oxidative phosphorylation	--	--	--	--	--	C	COG1008	subunit m	Cellular Component: mitochondrion (GO:0005739);|Biological Process: mitochondrial electron transport, NADH to ubiquinone (GO:0006120);|Molecular Function: NADH dehydrogenase (ubiquinone) activity (GO:0008137);|Cellular Component: integral component of membrane (GO:0016021);	--	--
i0_HQ_sampled12fd9_c374828_f14p0_667	--	--	--	--	--	--	--	--	--	--	--	--	--	--	--	--	--	--	--	--	--
i0_HQ_sampled12fd9_c374832_f25p0_571	--	--	--	--	--	--	--	--	--	--	--	--	--	--	--	--	--	--	--	--	--
i0_HQ_sampled12fd9_c374835_f23p0_496	gi|324028132|gb|ADY16617.1|	ribosomal protein S3a [Fenneropenaeus merguiensis]	Q56FG9.1	RecName: Full=40S ribosomal protein S3a	cmk:103185488	K02984	RP-S3Ae, RPS3A	small subunit ribosomal protein S3Ae	ko03010	Ribosome	--	--	--	--	--	J	COG1890	Ribosomal protein	Molecular Function: structural constituent of ribosome (GO:0003735);|Biological Process: translation (GO:0006412);|Cellular Component: cytosolic small ribosomal subunit (GO:0022627);	--	--
i0_HQ_sampled12fd9_c374837_f41p0_394	--	--	--	--	--	--	--	--	--	--	--	--	--	--	--	--	--	--	--	--	--
i0_HQ_sampled12fd9_c374841_f22p0_349	--	--	--	--	--	--	--	--	--	--	--	--	--	--	--	--	--	--	--	--	--
i0_HQ_sampled12fd9_c374844_f4p0_463	--	--	--	--	--	--	--	--	--	--	--	--	--	--	--	--	--	--	--	--	--
i0_HQ_sampled12fd9_c374846_f10p0_755	--	--	--	--	--	--	--	--	--	--	--	--	--	--	--	--	--	--	--	--	--
i0_HQ_sampled12fd9_c374847_f7p0_940	gi|385299066|gb|AFI60316.1|	heat shock protein 70 [Eulimnogammarus verrucosus]	Q24789.1	RecName: Full=Heat shock cognate 70 kDa protein; Short=HSP70	ola:100125490	K03283	HSPA1_8	heat shock 70kDa protein 1/2/6/8	ko04010|ko04915|ko04141|ko03040|ko04612|ko04213|ko04144	MAPK signaling pathway|Estrogen signaling pathway|Protein processing in endoplasmic reticulum|Spliceosome|Antigen processing and presentation|Longevity regulating pathway - multiple species|Endocytosis	KOG0101	Molecular chaperones HSP70/HSC70, HSP70 superfamily	[O]	CELLULAR PROCESSES AND SIGNALING	Posttranslational modification, protein turnover, chaperones	O	COG0443	Heat shock protein	Molecular Function: ATP binding (GO:0005524);	--	--
i0_HQ_sampled12fd9_c374856_f16p0_957	gi|1009376786|gb|KYN00176.1|	60S ribosomal protein L3 [Cyphomyrmex costatus]	O16797.3	RecName: Full=60S ribosomal protein L3	aec:105155008	K02925	RP-L3e, RPL3	large subunit ribosomal protein L3e	ko03010	Ribosome	KOG0746	60S ribosomal protein L3 and related proteins	[J]	INFORMATION STORAGE AND PROCESSING	Translation, ribosomal structure and biogenesis	J	COG0087	One of the primary rRNA binding proteins, it binds directly near the 3'-end of the 23S rRNA, where it nucleates assembly of the 50S subunit (By similarity)	--	--	--
i0_HQ_sampled12fd9_c374859_f4p0_303	--	--	--	--	--	--	--	--	--	--	--	--	--	--	--	--	--	--	--	--	--
i0_HQ_sampled12fd9_c374864_f33p0_721	--	--	--	--	--	--	--	--	--	--	--	--	--	--	--	--	--	--	--	--	--
i0_HQ_sampled12fd9_c374865_f11p0_290	--	--	--	--	--	--	--	--	--	--	--	--	--	--	--	--	--	--	--	--	--
i0_HQ_sampled12fd9_c374866_f2p0_529	gi|3907620|gb|AAC78681.1|	actin 1 [Penaeus monodon]	O16808.1	RecName: Full=Actin; Flags: Precursor	rro:104675775	K05692	ACTB_G1	actin beta/gamma 1	ko04145|ko04520|ko04670|ko04015|ko04390|ko04611|ko04391|ko04510|ko04745|ko04810|ko04530|ko04919|ko04210|ko04921	Phagosome|Adherens junction|Leukocyte transendothelial migration|Rap1 signaling pathway|Hippo signaling pathway|Platelet activation|Hippo signaling pathway - fly|Focal adhesion|Phototransduction - fly|Regulation of actin cytoskeleton|Tight junction|Thyroid hormone signaling pathway|Apoptosis|Oxytocin signaling pathway	KOG0676	Actin and related proteins	[Z]	CELLULAR PROCESSES AND SIGNALING	Cytoskeleton	Z	COG5277	Actin-related protein	Molecular Function: ATP binding (GO:0005524);	--	--
i0_HQ_sampled12fd9_c374867_f12p0_289	--	--	--	--	--	--	--	--	--	--	--	--	--	--	--	--	--	--	--	--	--
i0_HQ_sampled12fd9_c374868_f25p0_787	--	--	--	--	--	--	--	--	--	--	--	--	--	--	--	--	--	--	--	--	--
i0_HQ_sampled12fd9_c374871_f2p0_229	--	--	--	--	--	--	--	--	--	--	--	--	--	--	--	--	--	--	--	--	--
i0_HQ_sampled12fd9_c374873_f3p0_504	--	--	--	--	--	--	--	--	--	--	--	--	--	--	--	--	--	--	--	--	--
i0_HQ_sampled12fd9_c374876_f10p0_728	--	--	--	--	--	--	--	--	--	--	--	--	--	--	--	--	--	--	--	--	--
i0_HQ_sampled12fd9_c374877_f11p0_241	--	--	--	--	--	--	--	--	--	--	--	--	--	--	--	--	--	--	--	--	--
i0_HQ_sampled12fd9_c374879_f2p0_287	--	--	--	--	--	--	--	--	--	--	--	--	--	--	--	--	--	--	--	--	--
i0_HQ_sampled12fd9_c374880_f56p0_807	--	--	--	--	--	--	--	--	--	--	--	--	--	--	--	--	--	--	--	--	--
i0_HQ_sampled12fd9_c374881_f29p0_495	gi|255653872|gb|ACU25384.1|	crustin 3 [Panulirus japonicus]	--	--	--	--	--	--	--	--	--	--	--	--	--	--	--	--	--	--	--
i0_HQ_sampled12fd9_c374882_f3p0_734	--	--	--	--	--	--	--	--	--	--	--	--	--	--	--	--	--	--	--	--	--
i0_HQ_sampled12fd9_c374883_f3p0_585	--	--	--	--	--	--	--	--	--	--	--	--	--	--	--	--	--	--	--	--	--
i0_HQ_sampled12fd9_c374885_f4p0_511	gi|56121719|gb|AAV74196.1|	ribosomal protein L26 [Penaeus monodon]	P61256.1	RecName: Full=60S ribosomal protein L26	phu:Phum_PHUM226830	K02898	RP-L26e, RPL26	large subunit ribosomal protein L26e	ko03010	Ribosome	--	--	--	--	--	J	COG0198	One of the proteins that surrounds the polypeptide exit tunnel on the outside of the subunit (By similarity)	Molecular Function: structural constituent of ribosome (GO:0003735);|Biological Process: translation (GO:0006412);|Cellular Component: large ribosomal subunit (GO:0015934);	--	--
i0_HQ_sampled12fd9_c374886_f32p0_353	--	--	--	--	--	--	--	--	--	--	--	--	--	--	--	--	--	--	--	--	--
i0_HQ_sampled12fd9_c374889_f6p0_446	--	--	--	--	--	--	--	--	--	--	--	--	--	--	--	--	--	--	--	--	--
i0_HQ_sampled12fd9_c374890_f15p0_229	--	--	--	--	--	--	--	--	--	--	--	--	--	--	--	--	--	--	--	--	--
i0_HQ_sampled12fd9_c374893_f15p0_255	--	--	--	--	--	--	--	--	--	--	--	--	--	--	--	--	--	--	--	--	--
i0_HQ_sampled12fd9_c374894_f5p0_651	--	--	--	--	--	--	--	--	--	--	--	--	--	--	--	--	--	--	--	--	--
i0_HQ_sampled12fd9_c374895_f2p0_284	--	--	--	--	--	--	--	--	--	--	--	--	--	--	--	--	--	--	--	--	--
i0_HQ_sampled12fd9_c374900_f2p0_614	gi|952530021|gb|KRT83350.1|	ribosomal protein, partial [Oryctes borbonicus]	O01727.1	RecName: Full=40S ribosomal protein S6	tca:656796	K02991	RP-S6e, RPS6	small subunit ribosomal protein S6e	ko03010|ko04066|ko04910|ko04151|ko04150	Ribosome|HIF-1 signaling pathway|Insulin signaling pathway|PI3K-Akt signaling pathway|mTOR signaling pathway	--	--	--	--	--	J	COG2125	40s ribosomal protein s6	Molecular Function: structural constituent of ribosome (GO:0003735);|Cellular Component: ribosome (GO:0005840);|Biological Process: translation (GO:0006412);	--	--
i0_HQ_sampled12fd9_c374902_f2p0_557	--	--	--	--	--	--	--	--	--	--	--	--	--	--	--	--	--	--	--	--	--
i0_HQ_sampled12fd9_c374903_f6p0_383	--	--	--	--	--	--	--	--	--	--	--	--	--	--	--	--	--	--	--	--	--
i0_HQ_sampled12fd9_c374906_f5p0_527	gi|262401289|gb|ACY66547.1|	ribosomal protein L5, partial [Scylla paramamosain]	Q5XUC7.1	RecName: Full=60S ribosomal protein L5	cmk:103171726	K02932	RP-L5e, RPL5	large subunit ribosomal protein L5e	ko03010	Ribosome	--	--	--	--	--	J	COG0256	This is one of the proteins that binds and probably mediates the attachment of the 5S RNA into the large ribosomal subunit, where it forms part of the central protuberance (By similarity)	Cellular Component: intracellular (GO:0005622);	--	--
i0_HQ_sampled12fd9_c374908_f14p0_729	gi|957824093|ref|XP_014661779.1|	PREDICTED: MICOS complex subunit Mic10-like [Priapulus caudatus]	Q7TNS2.1	RecName: Full=MICOS complex subunit Mic10; AltName: Full=Mitochondrial inner membrane organizing system protein 1	lgi:LOTGIDRAFT_217865	K17784	MINOS1, MOS1	mitochondrial inner membrane organizing system protein 1	--	--	--	--	--	--	--	S	ENOG4112535	Mitochondrial inner membrane organizing system	--	--	--
i0_HQ_sampled12fd9_c374912_f5p0_294	--	--	--	--	--	--	--	--	--	--	--	--	--	--	--	--	--	--	--	--	--
i0_HQ_sampled12fd9_c374921_f19p0_744	gi|528746115|gb|AGS42193.1|	C-type lectin 2 [Fenneropenaeus merguiensis]	--	--	--	--	--	--	--	--	--	--	--	--	--	S	ENOG410ZUGU	CLECT	Molecular Function: carbohydrate binding (GO:0030246);	--	--
i0_HQ_sampled12fd9_c374923_f2p0_735	gi|283854609|gb|ADB44900.1|	DEAD(Asp-Glu-Ala-Asp) box polypeptide 5 [Macrobrachium nipponense]	Q5R4I9.1	RecName: Full=Probable ATP-dependent RNA helicase DDX5; AltName: Full=DEAD box protein 5	tca:661233	K13178	DDX17	ATP-dependent RNA helicase DDX17	--	--	KOG0331	ATP-dependent RNA helicase	[A]	INFORMATION STORAGE AND PROCESSING	RNA processing and modification	L	COG0513	purine NTP-dependent helicase activity	Molecular Function: nucleic acid binding (GO:0003676);|Molecular Function: helicase activity (GO:0004386);|Molecular Function: ATP binding (GO:0005524);	--	--
i0_HQ_sampled12fd9_c374925_f13p0_809	gi|676458395|ref|XP_009054961.1|	hypothetical protein LOTGIDRAFT_71188, partial [Lottia gigantea]	O70244.2	RecName: Full=Cubilin; AltName: Full=460 kDa receptor; AltName: Full=Glycoprotein 280; Short=gp280; AltName: Full=Intrinsic factor-cobalamin receptor; AltName: Full=Intrinsic factor-vitamin B12 receptor; Flags: Precursor	lgi:LOTGIDRAFT_71188	K14616	CUBN	cubilin	ko04977	Vitamin digestion and absorption	--	--	--	--	--	--	--	--	--	--	--
i0_HQ_sampled12fd9_c374927_f4p0_351	--	--	--	--	--	--	--	--	--	--	--	--	--	--	--	--	--	--	--	--	--
i0_HQ_sampled12fd9_c374928_f20p0_301	--	--	--	--	--	--	--	--	--	--	--	--	--	--	--	--	--	--	--	--	--
i0_HQ_sampled12fd9_c374932_f3p0_490	--	--	--	--	--	--	--	--	--	--	--	--	--	--	--	--	--	--	--	--	--
i0_HQ_sampled12fd9_c374934_f2p0_385	--	--	--	--	--	--	--	--	--	--	--	--	--	--	--	--	--	--	--	--	--
i0_HQ_sampled12fd9_c374938_f10p0_553	--	--	--	--	--	--	--	--	--	--	--	--	--	--	--	--	--	--	--	--	--
i0_HQ_sampled12fd9_c374942_f4p0_466	--	--	--	--	--	--	--	--	--	--	--	--	--	--	--	--	--	--	--	--	--
i0_HQ_sampled12fd9_c374944_f5p0_775	--	--	--	--	--	--	--	--	--	--	--	--	--	--	--	--	--	--	--	--	--
i0_HQ_sampled12fd9_c374945_f5p0_995	--	--	--	--	--	--	--	--	--	--	--	--	--	--	--	--	--	--	--	--	--
i0_HQ_sampled12fd9_c374950_f5p0_430	--	--	--	--	--	--	--	--	--	--	--	--	--	--	--	--	--	--	--	--	--
i0_HQ_sampled12fd9_c374952_f36p0_802	--	--	--	--	--	--	--	--	--	--	--	--	--	--	--	--	--	--	--	--	--
i0_HQ_sampled12fd9_c374953_f44p0_656	gi|321477047|gb|EFX88006.1|	hypothetical protein DAPPUDRAFT_311515 [Daphnia pulex]	Q9V7U0.1	RecName: Full=Pro-resilin; Flags: Precursor	--	--	--	--	--	--	--	--	--	--	--	--	--	--	--	--	--
i0_HQ_sampled12fd9_c374958_f20p0_582	--	--	--	--	--	--	--	--	--	--	--	--	--	--	--	--	--	--	--	--	--
i0_HQ_sampled12fd9_c374971_f11p0_718	--	--	--	--	--	--	--	--	--	--	--	--	--	--	--	--	--	--	--	--	--
i0_HQ_sampled12fd9_c374974_f13p0_451	--	--	--	--	--	--	--	--	--	--	--	--	--	--	--	--	--	--	--	--	--
i0_HQ_sampled12fd9_c374980_f10p0_442	gi|40887063|gb|AAR96459.1|	beta actin [Cherax quadricarinatus]	P45521.1	RecName: Full=Actin	rro:104675775	K05692	ACTB_G1	actin beta/gamma 1	ko04145|ko04520|ko04670|ko04015|ko04390|ko04611|ko04391|ko04510|ko04745|ko04810|ko04530|ko04919|ko04210|ko04921	Phagosome|Adherens junction|Leukocyte transendothelial migration|Rap1 signaling pathway|Hippo signaling pathway|Platelet activation|Hippo signaling pathway - fly|Focal adhesion|Phototransduction - fly|Regulation of actin cytoskeleton|Tight junction|Thyroid hormone signaling pathway|Apoptosis|Oxytocin signaling pathway	KOG0676	Actin and related proteins	[Z]	CELLULAR PROCESSES AND SIGNALING	Cytoskeleton	Z	COG5277	Actin-related protein	Molecular Function: ATP binding (GO:0005524);	--	--
i0_HQ_sampled12fd9_c374983_f18p0_253	--	--	--	--	--	--	--	--	--	--	--	--	--	--	--	--	--	--	--	--	--
i0_HQ_sampled12fd9_c374991_f45p0_876	--	--	--	--	--	--	--	--	--	--	--	--	--	--	--	--	--	--	--	--	--
i0_HQ_sampled12fd9_c374996_f4p0_371	--	--	--	--	--	--	--	--	--	--	--	--	--	--	--	--	--	--	--	--	--
i0_HQ_sampled12fd9_c375012_f3p0_559	--	--	--	--	--	--	--	--	--	--	--	--	--	--	--	--	--	--	--	--	--
i0_HQ_sampled12fd9_c375023_f7p0_785	--	--	--	--	--	--	--	--	--	--	--	--	--	--	--	--	--	--	--	--	--
i0_HQ_sampled12fd9_c375025_f71p0_503	gi|936682082|ref|XP_014238078.1|	PREDICTED: 60S ribosomal protein L34-like [Trichogramma pretiosum]	P45842.2	RecName: Full=60S ribosomal protein L34; AltName: Full=L31	soc:105194210	K02915	RP-L34e, RPL34	large subunit ribosomal protein L34e	ko03010	Ribosome	--	--	--	--	--	J	COG2174	(ribosomal) protein	--	--	--
i0_HQ_sampled12fd9_c375026_f12p0_1000	--	--	--	--	--	--	--	--	--	--	--	--	--	--	--	--	--	--	--	--	--
i0_HQ_sampled12fd9_c375027_f12p0_245	--	--	--	--	--	--	--	--	--	--	--	--	--	--	--	--	--	--	--	--	--
i0_HQ_sampled12fd9_c375029_f11p0_413	--	--	--	--	--	--	--	--	--	--	--	--	--	--	--	--	--	--	--	--	--
i0_HQ_sampled12fd9_c375030_f8p0_269	--	--	--	--	--	--	--	--	--	--	--	--	--	--	--	--	--	--	--	--	--
i0_HQ_sampled12fd9_c375031_f61p0_769	gi|241566019|ref|XP_002402071.1|	ribosomal protein L15, putative [Ixodes scapularis]	Q9XYC2.3	RecName: Full=60S ribosomal protein L15	isc:IscW_ISCW008173	K02877	RP-L15e, RPL15	large subunit ribosomal protein L15e	ko03010	Ribosome	--	--	--	--	--	J	COG1632	Ribosomal protein L15	Biological Process: cytoplasmic translation (GO:0002181);|Molecular Function: structural constituent of ribosome (GO:0003735);|Cellular Component: cytosolic large ribosomal subunit (GO:0022625);	--	--
i0_HQ_sampled12fd9_c375033_f12p0_467	gi|242024748|ref|XP_002432788.1|	40S ribosomal protein S4, putative [Pediculus humanus corporis]	Q95V34.1	RecName: Full=40S ribosomal protein S4	phu:Phum_PHUM601190	K02987	RP-S4e, RPS4	small subunit ribosomal protein S4e	ko03010	Ribosome	KOG0378	40S ribosomal protein S4	[J]	INFORMATION STORAGE AND PROCESSING	Translation, ribosomal structure and biogenesis	J	COG1471	(ribosomal) protein	Molecular Function: structural constituent of ribosome (GO:0003735);|Cellular Component: ribosome (GO:0005840);|Biological Process: translation (GO:0006412);|Molecular Function: rRNA binding (GO:0019843);	--	--
i0_HQ_sampled12fd9_c375034_f12p0_472	--	--	--	--	--	--	--	--	--	--	--	--	--	--	--	--	--	--	--	--	--
i0_HQ_sampled12fd9_c375035_f13p0_537	--	--	--	--	--	--	--	--	--	--	--	--	--	--	--	--	--	--	--	--	--
i0_HQ_sampled12fd9_c375037_f16p0_478	--	--	--	--	--	--	--	--	--	--	--	--	--	--	--	--	--	--	--	--	--
i0_HQ_sampled12fd9_c375038_f5p0_921	--	--	--	--	--	--	--	--	--	--	--	--	--	--	--	--	--	--	--	--	--
i0_HQ_sampled12fd9_c375039_f14p0_451	gi|470363282|ref|XP_004365566.1|	peptidylprolyl isomerase [Capsaspora owczarzaki ATCC 30864]	P34887.1	RecName: Full=Peptidyl-prolyl cis-trans isomerase; Short=PPIase; AltName: Full=Cyclophilin; AltName: Full=Cyclosporin A-binding protein; AltName: Full=Rotamase	sre:PTSG_01472	K09565	PPIF	peptidyl-prolyl isomerase F (cyclophilin D)	ko04020|ko04022	Calcium signaling pathway|cGMP-PKG signaling pathway	--	--	--	--	--	O	COG0652	peptidyl-prolyl cis-trans isomerase activity	Biological Process: protein peptidyl-prolyl isomerization (GO:0000413);|Molecular Function: peptidyl-prolyl cis-trans isomerase activity (GO:0003755);|Biological Process: protein folding (GO:0006457);	--	--
i0_HQ_sampled12fd9_c375041_f15p0_245	--	--	--	--	--	--	--	--	--	--	--	--	--	--	--	--	--	--	--	--	--
i0_HQ_sampled12fd9_c375043_f2p0_229	--	--	--	--	--	--	--	--	--	--	--	--	--	--	--	--	--	--	--	--	--
i0_HQ_sampled12fd9_c375044_f12p0_447	--	--	--	--	--	--	--	--	--	--	--	--	--	--	--	--	--	--	--	--	--
i0_HQ_sampled12fd9_c375045_f12p0_597	--	--	--	--	--	--	--	--	--	--	--	--	--	--	--	--	--	--	--	--	--
i0_HQ_sampled12fd9_c375046_f14p0_401	--	--	--	--	--	--	--	--	--	--	--	--	--	--	--	--	--	--	--	--	--
i0_HQ_sampled12fd9_c375048_f10p0_603	--	--	--	--	--	--	--	--	--	--	--	--	--	--	--	--	--	--	--	--	--
i0_HQ_sampled12fd9_c375050_f10p0_359	--	--	--	--	--	--	--	--	--	--	--	--	--	--	--	--	--	--	--	--	--
i0_HQ_sampled12fd9_c375052_f14p0_253	--	--	--	--	--	--	--	--	--	--	--	--	--	--	--	--	--	--	--	--	--
i0_HQ_sampled12fd9_c375055_f3p0_572	--	--	--	--	--	--	--	--	--	--	--	--	--	--	--	--	--	--	--	--	--
i0_HQ_sampled12fd9_c375056_f11p0_432	gi|3907620|gb|AAC78681.1|	actin 1 [Penaeus monodon]	P53501.1	RecName: Full=Actin-57B; Flags: Precursor	dpo:Dpse_GA24346	K05692	ACTB_G1	actin beta/gamma 1	ko04145|ko04520|ko04670|ko04015|ko04390|ko04611|ko04391|ko04510|ko04745|ko04810|ko04530|ko04919|ko04210|ko04921	Phagosome|Adherens junction|Leukocyte transendothelial migration|Rap1 signaling pathway|Hippo signaling pathway|Platelet activation|Hippo signaling pathway - fly|Focal adhesion|Phototransduction - fly|Regulation of actin cytoskeleton|Tight junction|Thyroid hormone signaling pathway|Apoptosis|Oxytocin signaling pathway	KOG0676	Actin and related proteins	[Z]	CELLULAR PROCESSES AND SIGNALING	Cytoskeleton	Z	COG5277	Actin-related protein	Molecular Function: ATP binding (GO:0005524);	--	--
i0_HQ_sampled12fd9_c375058_f12p0_356	--	--	--	--	--	--	--	--	--	--	--	--	--	--	--	--	--	--	--	--	--
i0_HQ_sampled12fd9_c375059_f7p0_388	--	--	--	--	--	--	--	--	--	--	--	--	--	--	--	--	--	--	--	--	--
i0_HQ_sampled12fd9_c375062_f13p0_506	gi|82795527|gb|ABB91677.1|	arthrodial cuticle protein AMP16.5 [Callinectes sapidus]	P81575.1	RecName: Full=Cuticle protein AM/CP1114; AltName: Full=CPAM/CPAM1114	--	--	--	--	--	--	--	--	--	--	--	S	ENOG4111PJ1	Cuticular protein	--	--	--
i0_HQ_sampled12fd9_c375065_f10p0_407	--	--	--	--	--	--	--	--	--	--	--	--	--	--	--	--	--	--	--	--	--
i0_HQ_sampled12fd9_c375066_f12p0_263	--	--	--	--	--	--	--	--	--	--	--	--	--	--	--	--	--	--	--	--	--
i0_HQ_sampled12fd9_c375068_f36p0_555	--	--	--	--	--	--	--	--	--	--	--	--	--	--	--	--	--	--	--	--	--
i0_HQ_sampled12fd9_c375069_f11p0_597	--	--	--	--	--	--	--	--	--	--	--	--	--	--	--	--	--	--	--	--	--
i0_HQ_sampled12fd9_c37506_f2p27_271	--	--	--	--	--	--	--	--	--	--	--	--	--	--	--	--	--	--	--	--	--
i0_HQ_sampled12fd9_c375072_f14p0_291	--	--	--	--	--	--	--	--	--	--	--	--	--	--	--	--	--	--	--	--	--
i0_HQ_sampled12fd9_c375074_f4p0_831	--	--	--	--	--	--	--	--	--	--	--	--	--	--	--	--	--	--	--	--	--
i0_HQ_sampled12fd9_c375076_f6p0_864	--	--	--	--	--	--	--	--	--	--	--	--	--	--	--	--	--	--	--	--	--
i0_HQ_sampled12fd9_c375079_f15p0_384	--	--	--	--	--	--	--	--	--	--	--	--	--	--	--	--	--	--	--	--	--
i0_HQ_sampled12fd9_c375081_f10p0_706	--	--	--	--	--	--	--	--	--	--	--	--	--	--	--	--	--	--	--	--	--
i0_HQ_sampled12fd9_c375082_f10p0_749	gi|946526321|gb|ALM09356.1|	glutathione peroxidase 3 [Penaeus monodon]	G9JJU2.1	RecName: Full=Glutathione peroxidase; Short=PcGPx; Short=Se-PcGPx	lcm:102346689	K00432	gpx	glutathione peroxidase	ko00480|ko04918|ko00590	Glutathione metabolism|Thyroid hormone synthesis|Arachidonic acid metabolism	--	--	--	--	--	O	COG0386	glutathione peroxidase	Molecular Function: peroxidase activity (GO:0004601);|Biological Process: response to stimulus (GO:0050896);	--	--
i0_HQ_sampled12fd9_c375084_f17p0_999	--	--	--	--	--	--	--	--	--	--	--	--	--	--	--	--	--	--	--	--	--
i0_HQ_sampled12fd9_c375085_f3p0_509	gi|817223744|ref|XP_012287114.1|	PREDICTED: 60S ribosomal protein L6 [Orussus abietinus]	P47991.1	RecName: Full=60S ribosomal protein L6	hst:105187769	K02934	RP-L6e, RPL6	large subunit ribosomal protein L6e	ko03010	Ribosome	--	--	--	--	--	J	COG2163	(ribosomal) protein	--	--	--
i0_HQ_sampled12fd9_c375088_f10p0_907	--	--	--	--	--	--	--	--	--	--	--	--	--	--	--	--	--	--	--	--	--
i0_HQ_sampled12fd9_c375095_f5p0_306	--	--	--	--	--	--	--	--	--	--	--	--	--	--	--	--	--	--	--	--	--
i0_HQ_sampled12fd9_c375097_f4p0_372	--	--	--	--	--	--	--	--	--	--	--	--	--	--	--	--	--	--	--	--	--
i0_HQ_sampled12fd9_c375098_f5p0_548	--	--	--	--	--	--	--	--	--	--	--	--	--	--	--	--	--	--	--	--	--
i0_HQ_sampled12fd9_c375099_f2p0_417	--	--	--	--	--	--	--	--	--	--	--	--	--	--	--	--	--	--	--	--	--
i0_HQ_sampled12fd9_c375101_f17p0_727	gi|817059732|ref|XP_012251384.1|	PREDICTED: NADH dehydrogenase [ubiquinone] 1 beta subcomplex subunit 11, mitochondrial [Athalia rosae]	--	--	tca:658529	K11351	NDUFB11	NADH dehydrogenase (ubiquinone) 1 beta subcomplex subunit 11	ko00190	Oxidative phosphorylation	--	--	--	--	--	U	ENOG41120A5	NADH dehydrogenase (ubiquinone) 1 beta subcomplex	--	--	--
i0_HQ_sampled12fd9_c375110_f11p0_978	gi|629729692|ref|XP_007824392.1|	hypothetical protein MAA_08203 [Metarhizium robertsii ARSEF 23]	--	--	--	--	--	--	--	--	--	--	--	--	--	--	--	--	--	--	--
i0_HQ_sampled12fd9_c375113_f2p0_491	--	--	--	--	--	--	--	--	--	--	--	--	--	--	--	--	--	--	--	--	--
i0_HQ_sampled12fd9_c375117_f11p0_603	gi|597859699|gb|EYC09120.1|	hypothetical protein Y032_0062g3371 [Ancylostoma ceylanicum]	P11369.2	RecName: Full=LINE-1 retrotransposable element ORF2 protein; Short=ORF2p; AltName: Full=Long interspersed element-1; Short=L1; AltName: Full=Retrovirus-related Pol polyprotein LINE-1; Includes: RecName: Full=Reverse transcriptase; Includes: RecName: Full=Endonuclease	lcm:102353747	K20465	OSBPL9_10_11, ORP9_10_11	oxysterol-binding protein-related protein 9/10/11	--	--	--	--	--	--	--	S	ENOG410Y65V	Retrotransposon protein	--	--	--
i0_HQ_sampled12fd9_c375118_f6p0_278	gi|3907620|gb|AAC78681.1|	actin 1 [Penaeus monodon]	P45521.1	RecName: Full=Actin	rro:104675775	K05692	ACTB_G1	actin beta/gamma 1	ko04145|ko04520|ko04670|ko04015|ko04390|ko04611|ko04391|ko04510|ko04745|ko04810|ko04530|ko04919|ko04210|ko04921	Phagosome|Adherens junction|Leukocyte transendothelial migration|Rap1 signaling pathway|Hippo signaling pathway|Platelet activation|Hippo signaling pathway - fly|Focal adhesion|Phototransduction - fly|Regulation of actin cytoskeleton|Tight junction|Thyroid hormone signaling pathway|Apoptosis|Oxytocin signaling pathway	KOG0676	Actin and related proteins	[Z]	CELLULAR PROCESSES AND SIGNALING	Cytoskeleton	Z	COG5277	Actin-related protein	--	--	--
i0_HQ_sampled12fd9_c375121_f2p0_238	--	--	--	--	--	--	--	--	--	--	--	--	--	--	--	--	--	--	--	--	--
i0_HQ_sampled12fd9_c375126_f12p0_257	--	--	--	--	--	--	--	--	--	--	--	--	--	--	--	--	--	--	--	--	--
i0_HQ_sampled12fd9_c375128_f17p0_519	gi|32423714|gb|AAP81255.1|	actin [Haemaphysalis longicornis]	O42161.1	RecName: Full=Actin, cytoplasmic 1; AltName: Full=Beta-actin; Contains: RecName: Full=Actin, cytoplasmic 1, N-terminally processed	ola:100049433	K05692	ACTB_G1	actin beta/gamma 1	ko04145|ko04520|ko04670|ko04015|ko04390|ko04611|ko04391|ko04510|ko04745|ko04810|ko04530|ko04919|ko04210|ko04921	Phagosome|Adherens junction|Leukocyte transendothelial migration|Rap1 signaling pathway|Hippo signaling pathway|Platelet activation|Hippo signaling pathway - fly|Focal adhesion|Phototransduction - fly|Regulation of actin cytoskeleton|Tight junction|Thyroid hormone signaling pathway|Apoptosis|Oxytocin signaling pathway	KOG0676	Actin and related proteins	[Z]	CELLULAR PROCESSES AND SIGNALING	Cytoskeleton	Z	COG5277	Actin-related protein	Molecular Function: ATP binding (GO:0005524);	--	--
i0_HQ_sampled12fd9_c375136_f5p0_882	--	--	--	--	--	--	--	--	--	--	--	--	--	--	--	--	--	--	--	--	--
i0_HQ_sampled12fd9_c375138_f25p0_381	--	--	--	--	--	--	--	--	--	--	--	--	--	--	--	--	--	--	--	--	--
i0_HQ_sampled12fd9_c375139_f4p0_792	gi|985419032|ref|XP_015375002.1|	PREDICTED: larval/pupal cuticle protein H1C-like [Diuraphis noxia]	P82119.1	RecName: Full=Cuticle protein 6; AltName: Full=BcNCP14.9	--	--	--	--	--	--	--	--	--	--	--	S	ENOG41125JG	structural constituent of chitin-based cuticle	--	--	--
i0_HQ_sampled12fd9_c375148_f42p0_577	gi|954600779|gb|KRZ77739.1|	60S ribosomal protein L21 [Trichinella papuae]	P46778.2	RecName: Full=60S ribosomal protein L21; AltName: Full=Large ribosomal subunit protein eL21	tsp:Tsp_04780	K02889	RP-L21e, RPL21	large subunit ribosomal protein L21e	ko03010	Ribosome	--	--	--	--	--	J	COG2139	(ribosomal) protein	Molecular Function: structural constituent of ribosome (GO:0003735);|Cellular Component: ribosome (GO:0005840);|Biological Process: translation (GO:0006412);	--	--
i0_HQ_sampled12fd9_c375155_f9p0_242	--	--	--	--	--	--	--	--	--	--	--	--	--	--	--	--	--	--	--	--	--
i0_HQ_sampled12fd9_c375157_f5p0_535	gi|942368179|gb|JAN66019.1|	Glutathione s-transferase, partial [Daphnia magna]	Q5R8E8.3	RecName: Full=Glutathione S-transferase Mu 2; AltName: Full=GST class-mu 2; AltName: Full=GSTM2-2	pon:100174562	K00799	GST, gst	glutathione S-transferase	ko00982|ko00480|ko00980	Drug metabolism - cytochrome P450|Glutathione metabolism|Metabolism of xenobiotics by cytochrome P450	--	--	--	--	--	O	ENOG4111VAU	glutathione Stransferase	--	--	--
i0_HQ_sampled12fd9_c375158_f4p0_323	--	--	--	--	--	--	--	--	--	--	--	--	--	--	--	--	--	--	--	--	--
i0_HQ_sampled12fd9_c375164_f3p0_278	--	--	--	--	--	--	--	--	--	--	--	--	--	--	--	--	--	--	--	--	--
i0_HQ_sampled12fd9_c375170_f41p0_830	gi|768932969|ref|XP_011607083.1|	PREDICTED: histone H3.3-like [Takifugu rubripes]	P84245.2	RecName: Full=Histone H3.3	--	--	--	--	--	--	--	--	--	--	--	B	COG2036	Core component of nucleosome. Nucleosomes wrap and compact DNA into chromatin, limiting DNA accessibility to the cellular machineries which require DNA as a template. Histones thereby play a central role in transcription regulation, DNA repair, DNA replication and chromosomal stability. DNA accessibility is regulated via a complex set of post-translational modifications of histones, also called h…	--	--	--
i0_HQ_sampled12fd9_c375172_f2p0_281	gi|108773740|gb|ABG11961.1|	tail muscle elongation factor 1 gamma [Procambarus clarkii]	P12261.3	RecName: Full=Elongation factor 1-gamma; Short=EF-1-gamma; AltName: Full=eEF-1B gamma	--	--	--	--	--	--	--	--	--	--	--	O	COG0625	glutathione Stransferase	Molecular Function: translation elongation factor activity (GO:0003746);|Biological Process: translational elongation (GO:0006414);	--	--
i0_HQ_sampled12fd9_c375174_f5p0_271	--	--	--	--	--	--	--	--	--	--	--	--	--	--	--	--	--	--	--	--	--
i0_HQ_sampled12fd9_c375181_f2p0_559	--	--	--	--	--	--	--	--	--	--	--	--	--	--	--	--	--	--	--	--	--
i0_HQ_sampled12fd9_c375184_f3p0_325	--	--	--	--	--	--	--	--	--	--	--	--	--	--	--	--	--	--	--	--	--
i0_HQ_sampled12fd9_c375186_f2p0_515	--	--	--	--	--	--	--	--	--	--	--	--	--	--	--	--	--	--	--	--	--
i0_HQ_sampled12fd9_c375189_f5p0_365	gi|66809065|ref|XP_638255.1|	LSM domain-containing protein [Dictyostelium discoideum AX4]	Q54NC5.1	RecName: Full=Probable small nuclear ribonucleoprotein Sm D2; Short=Sm-D2; AltName: Full=snRNP core protein D2	ddi:DDB_G0285395	K11096	SNRPD2, SMD2	small nuclear ribonucleoprotein D2	ko03040	Spliceosome	--	--	--	--	--	K	COG1958	small nuclear ribonucleoprotein	--	--	--
i0_HQ_sampled12fd9_c375190_f4p0_229	--	--	--	--	--	--	--	--	--	--	--	--	--	--	--	--	--	--	--	--	--
i0_HQ_sampled12fd9_c375197_f9p0_330	--	--	--	--	--	--	--	--	--	--	--	--	--	--	--	--	--	--	--	--	--
i0_HQ_sampled12fd9_c375203_f6p0_401	gi|9186884|dbj|BAA99543.1|	BCS-1 [Amphibalanus amphitrite]	--	--	--	--	--	--	--	--	--	--	--	--	--	--	--	--	--	--	--
i0_HQ_sampled12fd9_c375204_f2p0_908	gi|642911248|ref|XP_008199756.1|	PREDICTED: polyadenylate-binding protein 1 isoform X1 [Tribolium castaneum]	P20965.3	RecName: Full=Polyadenylate-binding protein 1-A; Short=PABP-1-A; Short=Poly(A)-binding protein 1-A; Short=xPABP1-A; AltName: Full=Cytoplasmic poly(A)-binding protein 1-A	tca:657776	K13126	PABPC	polyadenylate-binding protein	ko03018|ko03015|ko03013	RNA degradation|mRNA surveillance pathway|RNA transport	KOG0123	Polyadenylate-binding protein (RRM superfamily)	[AJ]	INFORMATION STORAGE AND PROCESSING|INFORMATION STORAGE AND PROCESSING	RNA processing and modification |Translation, ribosomal structure and biogenesis	S	ENOG410XR5X	poly(A) binding protein, cytoplasmic	Molecular Function: nucleic acid binding (GO:0003676);	--	--
i0_HQ_sampled12fd9_c375210_f3p0_307	--	--	--	--	--	--	--	--	--	--	--	--	--	--	--	--	--	--	--	--	--
i0_HQ_sampled12fd9_c375212_f15p0_380	--	--	--	--	--	--	--	--	--	--	--	--	--	--	--	--	--	--	--	--	--
i0_HQ_sampled12fd9_c375214_f3p0_323	--	--	--	--	--	--	--	--	--	--	--	--	--	--	--	--	--	--	--	--	--
i0_HQ_sampled12fd9_c375221_f2p0_445	--	--	--	--	--	--	--	--	--	--	--	--	--	--	--	--	--	--	--	--	--
i0_HQ_sampled12fd9_c375224_f29p0_526	--	--	--	--	--	--	--	--	--	--	--	--	--	--	--	--	--	--	--	--	--
i0_HQ_sampled12fd9_c375229_f2p0_533	--	--	--	--	--	--	--	--	--	--	--	--	--	--	--	--	--	--	--	--	--
i0_HQ_sampled12fd9_c375236_f2p0_654	--	--	--	--	--	--	--	--	--	--	--	--	--	--	--	--	--	--	--	--	--
i0_HQ_sampled12fd9_c375248_f6p0_430	--	--	--	--	--	--	--	--	--	--	--	--	--	--	--	--	--	--	--	--	--
i0_HQ_sampled12fd9_c375256_f2p0_282	--	--	--	--	--	--	--	--	--	--	--	--	--	--	--	--	--	--	--	--	--
i0_HQ_sampled12fd9_c375259_f4p0_354	--	--	--	--	--	--	--	--	--	--	--	--	--	--	--	--	--	--	--	--	--
i0_HQ_sampled12fd9_c375264_f9p0_969	gi|225709760|gb|ACO10726.1|	disulfide-isomerase A3 precursor [Caligus rogercresseyi]	P38658.1	RecName: Full=Probable protein disulfide-isomerase ER-60; AltName: Full=ERP60; Flags: Precursor	dvi:Dvir_GJ18390	K08056	PDIA3, GRP58	protein disulfide isomerase family A, member 3	ko04612|ko04141	Antigen processing and presentation|Protein processing in endoplasmic reticulum	KOG0190	Protein disulfide isomerase (prolyl 4-hydroxylase beta subunit)	[O]	CELLULAR PROCESSES AND SIGNALING	Posttranslational modification, protein turnover, chaperones	O	COG0526	Thioredoxin	Molecular Function: protein disulfide isomerase activity (GO:0003756);|Cellular Component: endoplasmic reticulum (GO:0005783);|Biological Process: cell redox homeostasis (GO:0045454);	--	--
i0_HQ_sampled12fd9_c375265_f3p0_543	--	--	--	--	--	--	--	--	--	--	--	--	--	--	--	--	--	--	--	--	--
i0_HQ_sampled12fd9_c375267_f19p0_477	gi|58386971|ref|XP_315204.2|	AGAP004616-PA [Anopheles gambiae str. PEST]	Q24407.1	RecName: Full=ATP synthase-coupling factor 6, mitochondrial; Short=ATPase subunit F6; Flags: Precursor	aga:AgaP_AGAP004616	K02131	ATPeF0F6, ATP5J	F-type H+-transporting ATPase subunit 6	ko00190	Oxidative phosphorylation	--	--	--	--	--	C	ENOG41122G1	Mitochondrial membrane ATP synthase (F(1)F(0) ATP synthase or Complex V) produces ATP from ADP in the presence of a proton gradient across the membrane which is generated by electron transport complexes of the respiratory chain	Cellular Component: mitochondrial proton-transporting ATP synthase complex, coupling factor F(o) (GO:0000276);|Molecular Function: hydrogen ion transmembrane transporter activity (GO:0015078);|Biological Process: ATP synthesis coupled proton transport (GO:0015986);	--	--
i0_HQ_sampled12fd9_c375272_f2p0_369	--	--	--	--	--	--	--	--	--	--	--	--	--	--	--	--	--	--	--	--	--
i0_HQ_sampled12fd9_c375276_f2p0_298	--	--	--	--	--	--	--	--	--	--	--	--	--	--	--	--	--	--	--	--	--
i0_HQ_sampled12fd9_c375280_f5p0_375	--	--	--	--	--	--	--	--	--	--	--	--	--	--	--	--	--	--	--	--	--
i0_HQ_sampled12fd9_c375284_f4p0_973	--	--	--	--	--	--	--	--	--	--	--	--	--	--	--	--	--	--	--	--	--
i0_HQ_sampled12fd9_c375289_f5p0_339	--	--	--	--	--	--	--	--	--	--	--	--	--	--	--	--	--	--	--	--	--
i0_HQ_sampled12fd9_c375291_f3p0_356	--	--	--	--	--	--	--	--	--	--	--	--	--	--	--	--	--	--	--	--	--
i0_HQ_sampled12fd9_c375298_f7p0_413	--	--	--	--	--	--	--	--	--	--	--	--	--	--	--	--	--	--	--	--	--
i0_HQ_sampled12fd9_c375301_f4p0_604	gi|384255136|gb|AFH75400.1|	elongation factor 2 [Eriocheir sinensis]	Q1HPK6.1	RecName: Full=Translation elongation factor 2; Short=EF-2	ame:409167	K03234	EEF2	elongation factor 2	ko04921|ko04152	Oxytocin signaling pathway|AMPK signaling pathway	KOG0469	Elongation factor 2	[J]	INFORMATION STORAGE AND PROCESSING	Translation, ribosomal structure and biogenesis	J	COG0480	Catalyzes the GTP-dependent ribosomal translocation step during translation elongation. During this step, the ribosome changes from the pre-translocational (PRE) to the post- translocational (POST) state as the newly formed A-site-bound peptidyl-tRNA and P-site-bound deacylated tRNA move to the P and E sites, respectively. Catalyzes the coordinated movement of the two tRNA molecules, the mRNA and…	Molecular Function: translation elongation factor activity (GO:0003746);|Molecular Function: GTPase activity (GO:0003924);|Molecular Function: GTP binding (GO:0005525);|Biological Process: translational elongation (GO:0006414);	--	--
i0_HQ_sampled12fd9_c375303_f2p0_560	--	--	--	--	--	--	--	--	--	--	--	--	--	--	--	--	--	--	--	--	--
i0_HQ_sampled12fd9_c375307_f3p0_279	--	--	--	--	--	--	--	--	--	--	--	--	--	--	--	--	--	--	--	--	--
i0_HQ_sampled12fd9_c375317_f4p0_374	--	--	--	--	--	--	--	--	--	--	--	--	--	--	--	--	--	--	--	--	--
i0_HQ_sampled12fd9_c375318_f2p0_312	--	--	--	--	--	--	--	--	--	--	--	--	--	--	--	--	--	--	--	--	--
i0_HQ_sampled12fd9_c375325_f2p0_472	--	--	--	--	--	--	--	--	--	--	--	--	--	--	--	--	--	--	--	--	--
i0_HQ_sampled12fd9_c375326_f2p0_884	gi|321466121|gb|EFX77118.1|	hypothetical protein DAPPUDRAFT_305875 [Daphnia pulex]	--	--	--	--	--	--	--	--	--	--	--	--	--	S	ENOG4111SVQ	NA	--	--	--
i0_HQ_sampled12fd9_c375327_f28p0_720	--	--	--	--	--	--	--	--	--	--	--	--	--	--	--	--	--	--	--	--	--
i0_HQ_sampled12fd9_c375328_f22p0_750	--	--	--	--	--	--	--	--	--	--	--	--	--	--	--	--	--	--	--	--	--
i0_HQ_sampled12fd9_c375329_f2p0_933	--	--	--	--	--	--	--	--	--	--	--	--	--	--	--	--	--	--	--	--	--
i0_HQ_sampled12fd9_c375330_f13p0_494	gi|374719840|gb|AEZ67461.1|	trypsinogen 1 [Litopenaeus vannamei]	P00765.1	RecName: Full=Trypsin-1; AltName: Full=Trypsin I	xma:102237162	K09632	CTRL	chymotrypsin-like protease	ko04974|ko04972	Protein digestion and absorption|Pancreatic secretion	--	--	--	--	--	O	COG5640	protease	--	--	--
i0_HQ_sampled12fd9_c375334_f21p0_913	--	--	--	--	--	--	--	--	--	--	--	--	--	--	--	--	--	--	--	--	--
i0_HQ_sampled12fd9_c375347_f10p0_951	gi|148646395|gb|ABR01223.1|	elongation factor 2 [Penaeus monodon]	Q1HPK6.1	RecName: Full=Translation elongation factor 2; Short=EF-2	ame:409167	K03234	EEF2	elongation factor 2	ko04921|ko04152	Oxytocin signaling pathway|AMPK signaling pathway	KOG0469	Elongation factor 2	[J]	INFORMATION STORAGE AND PROCESSING	Translation, ribosomal structure and biogenesis	J	COG0480	Catalyzes the GTP-dependent ribosomal translocation step during translation elongation. During this step, the ribosome changes from the pre-translocational (PRE) to the post- translocational (POST) state as the newly formed A-site-bound peptidyl-tRNA and P-site-bound deacylated tRNA move to the P and E sites, respectively. Catalyzes the coordinated movement of the two tRNA molecules, the mRNA and…	Molecular Function: translation elongation factor activity (GO:0003746);|Molecular Function: GTPase activity (GO:0003924);|Molecular Function: GTP binding (GO:0005525);|Biological Process: translational elongation (GO:0006414);	--	--
i0_HQ_sampled12fd9_c375348_f11p0_952	--	--	--	--	--	--	--	--	--	--	--	--	--	--	--	--	--	--	--	--	--
i0_HQ_sampled12fd9_c375349_f7p0_882	--	--	--	--	--	--	--	--	--	--	--	--	--	--	--	--	--	--	--	--	--
i0_HQ_sampled12fd9_c375350_f6p0_908	gi|1009600843|ref|XP_015928720.1|	PREDICTED: von Willebrand factor C and EGF domain-containing protein-like [Parasteatoda tepidariorum]	--	--	--	--	--	--	--	--	--	--	--	--	--	S	ENOG41128HH	NA	--	--	--
i0_HQ_sampled12fd9_c375352_f6p0_791	--	--	--	--	--	--	--	--	--	--	--	--	--	--	--	--	--	--	--	--	--
i0_HQ_sampled12fd9_c375354_f10p0_301	--	--	--	--	--	--	--	--	--	--	--	--	--	--	--	--	--	--	--	--	--
i0_HQ_sampled12fd9_c375356_f10p0_597	--	--	--	--	--	--	--	--	--	--	--	--	--	--	--	--	--	--	--	--	--
i0_HQ_sampled12fd9_c375360_f45p0_783	gi|926631936|ref|XP_013781715.1|	PREDICTED: 60S ribosomal protein L13-like [Limulus polyphemus]	P26373.4	RecName: Full=60S ribosomal protein L13; AltName: Full=Breast basic conserved protein 1; AltName: Full=Large ribosomal subunit protein eL13	ame:552517	K02873	RP-L13e, RPL13	large subunit ribosomal protein L13e	ko03010	Ribosome	--	--	--	--	--	J	COG4352	cytoplasmic translation	--	--	--
i0_HQ_sampled12fd9_c375368_f11p0_546	--	--	--	--	--	--	--	--	--	--	--	--	--	--	--	--	--	--	--	--	--
i0_HQ_sampled12fd9_c375369_f15p0_540	--	--	--	--	--	--	--	--	--	--	--	--	--	--	--	--	--	--	--	--	--
i0_HQ_sampled12fd9_c375370_f12p0_614	--	--	--	--	--	--	--	--	--	--	--	--	--	--	--	--	--	--	--	--	--
i0_HQ_sampled12fd9_c375371_f10p0_994	--	--	--	--	--	--	--	--	--	--	--	--	--	--	--	--	--	--	--	--	--
i0_HQ_sampled12fd9_c375376_f10p0_455	--	--	--	--	--	--	--	--	--	--	--	--	--	--	--	--	--	--	--	--	--
i0_HQ_sampled12fd9_c375378_f27p0_466	--	--	--	--	--	--	--	--	--	--	--	--	--	--	--	--	--	--	--	--	--
i0_HQ_sampled12fd9_c375379_f13p0_392	--	--	--	--	--	--	--	--	--	--	--	--	--	--	--	--	--	--	--	--	--
i0_HQ_sampled12fd9_c375380_f16p0_680	--	--	--	--	--	--	--	--	--	--	--	--	--	--	--	--	--	--	--	--	--
i0_HQ_sampled12fd9_c375382_f10p0_391	--	--	--	--	--	--	--	--	--	--	--	--	--	--	--	--	--	--	--	--	--
i0_HQ_sampled12fd9_c375383_f55p0_718	gi|645011262|ref|XP_008213727.1|	PREDICTED: 60S ribosomal protein L13a [Nasonia vitripennis]	Q962U0.1	RecName: Full=60S ribosomal protein L13a	nvi:100118263	K02872	RP-L13Ae, RPL13A	large subunit ribosomal protein L13Ae	ko03010	Ribosome	--	--	--	--	--	J	COG0102	This protein is one of the early assembly proteins of the 50S ribosomal subunit, although it is not seen to bind rRNA by itself. It is important during the early stages of 50S assembly (By similarity)	--	--	--
i0_HQ_sampled12fd9_c375388_f19p0_267	--	--	--	--	--	--	--	--	--	--	--	--	--	--	--	--	--	--	--	--	--
i0_HQ_sampled12fd9_c375397_f13p0_477	--	--	--	--	--	--	--	--	--	--	--	--	--	--	--	--	--	--	--	--	--
i0_HQ_sampled12fd9_c375403_f31p0_517	--	--	--	--	--	--	--	--	--	--	--	--	--	--	--	--	--	--	--	--	--
i0_HQ_sampled12fd9_c375407_f3p0_752	--	--	--	--	--	--	--	--	--	--	--	--	--	--	--	--	--	--	--	--	--
i0_HQ_sampled12fd9_c375408_f19p0_235	--	--	--	--	--	--	--	--	--	--	--	--	--	--	--	--	--	--	--	--	--
i0_HQ_sampled12fd9_c375410_f2p0_702	gi|702240673|ref|XP_010045506.1|	PREDICTED: peptidyl-prolyl cis-trans isomerase [Eucalyptus grandis]	Q01490.1	RecName: Full=Peptidyl-prolyl cis-trans isomerase B; Short=PPIase B; AltName: Full=Cyclophilin B; AltName: Full=Rotamase B; Flags: Precursor	egr:104434228	K03768	PPIB, ppiB	peptidyl-prolyl cis-trans isomerase B (cyclophilin B)	--	--	--	--	--	--	--	O	ENOG410Z0G4	PPIases accelerate the folding of proteins (By similarity)	Biological Process: cellular process (GO:0009987);|Molecular Function: isomerase activity (GO:0016853);	--	--
i0_HQ_sampled12fd9_c375412_f12p0_232	--	--	--	--	--	--	--	--	--	--	--	--	--	--	--	--	--	--	--	--	--
i0_HQ_sampled12fd9_c375419_f39p0_993	--	--	--	--	--	--	--	--	--	--	--	--	--	--	--	--	--	--	--	--	--
i0_HQ_sampled12fd9_c375423_f4p0_297	--	--	--	--	--	--	--	--	--	--	--	--	--	--	--	--	--	--	--	--	--
i0_HQ_sampled12fd9_c375429_f54p0_816	gi|385100012|ref|YP_006234455.1|	ND2 gene product (mitochondrion) [Gammarus duebeni]	P34848.2	RecName: Full=NADH-ubiquinone oxidoreductase chain 2; AltName: Full=NADH dehydrogenase subunit 2	aga:ND2	K03879	ND2	NADH-ubiquinone oxidoreductase chain 2	ko00190	Oxidative phosphorylation	--	--	--	--	--	C	COG1009	subunit l	Cellular Component: membrane (GO:0016020);	--	--
i0_HQ_sampled12fd9_c375430_f3p0_720	--	--	--	--	--	--	--	--	--	--	--	--	--	--	--	--	--	--	--	--	--
i0_HQ_sampled12fd9_c375433_f17p0_261	--	--	--	--	--	--	--	--	--	--	--	--	--	--	--	--	--	--	--	--	--
i0_HQ_sampled12fd9_c375434_f32p0_648	--	--	--	--	--	--	--	--	--	--	--	--	--	--	--	--	--	--	--	--	--
i0_HQ_sampled12fd9_c375436_f17p0_592	--	--	--	--	--	--	--	--	--	--	--	--	--	--	--	--	--	--	--	--	--
i0_HQ_sampled12fd9_c375438_f22p0_266	--	--	--	--	--	--	--	--	--	--	--	--	--	--	--	--	--	--	--	--	--
i0_HQ_sampled12fd9_c375441_f41p0_975	--	--	--	--	--	--	--	--	--	--	--	--	--	--	--	--	--	--	--	--	--
i0_HQ_sampled12fd9_c375444_f27p0_424	--	--	--	--	--	--	--	--	--	--	--	--	--	--	--	--	--	--	--	--	--
i0_HQ_sampled12fd9_c375446_f14p0_430	gi|930174217|gb|ALF44683.1|	receptor for activated protein kinase C [Eriocheir sinensis]	O42249.1	RecName: Full=Guanine nucleotide-binding protein subunit beta-2-like 1; AltName: Full=Receptor of activated protein kinase C; Short=RACK	--	--	--	--	--	--	KOG0279	G protein beta subunit-like protein	[T]	CELLULAR PROCESSES AND SIGNALING	Signal transduction mechanisms	S	ENOG410XQGZ	guanine nucleotidebinding protein	Molecular Function: kinase activity (GO:0016301);|Biological Process: phosphorylation (GO:0016310);	--	--
i0_HQ_sampled12fd9_c375450_f25p0_318	gi|207298833|gb|ACI23568.1|	skeletal muscle actin 5 [Homarus americanus]	P45521.1	RecName: Full=Actin	rro:104675775	K05692	ACTB_G1	actin beta/gamma 1	ko04145|ko04520|ko04670|ko04015|ko04390|ko04611|ko04391|ko04510|ko04745|ko04810|ko04530|ko04919|ko04210|ko04921	Phagosome|Adherens junction|Leukocyte transendothelial migration|Rap1 signaling pathway|Hippo signaling pathway|Platelet activation|Hippo signaling pathway - fly|Focal adhesion|Phototransduction - fly|Regulation of actin cytoskeleton|Tight junction|Thyroid hormone signaling pathway|Apoptosis|Oxytocin signaling pathway	KOG0676	Actin and related proteins	[Z]	CELLULAR PROCESSES AND SIGNALING	Cytoskeleton	Z	COG5277	Actin-related protein	Molecular Function: ATP binding (GO:0005524);	--	--
i0_HQ_sampled12fd9_c375457_f5p0_306	gi|928499734|gb|ALE99171.1|	40S ribosomal protein S20 [Procambarus clarkii]	P23403.1	RecName: Full=40S ribosomal protein S20; AltName: Full=S22	sko:100372305	K02969	RP-S20e, RPS20	small subunit ribosomal protein S20e	ko03010	Ribosome	--	--	--	--	--	J	COG0051	tRNA binding	Molecular Function: structural constituent of ribosome (GO:0003735);|Biological Process: translation (GO:0006412);|Cellular Component: small ribosomal subunit (GO:0015935);	--	--
i0_HQ_sampled12fd9_c375459_f11p0_565	gi|952549535|dbj|GAQ08612.1|	hypothetical protein ALT_5933 [Aspergillus lentulus]	--	--	--	--	--	--	--	--	--	--	--	--	--	S	ENOG410Y37X	NA	--	--	--
i0_HQ_sampled12fd9_c375465_f13p0_347	--	--	--	--	--	--	--	--	--	--	--	--	--	--	--	--	--	--	--	--	--
i0_HQ_sampled12fd9_c375468_f3p0_386	--	--	--	--	--	--	--	--	--	--	--	--	--	--	--	--	--	--	--	--	--
i0_HQ_sampled12fd9_c375470_f22p0_750	gi|7414466|emb|CAB85964.1|	phosphoenolpyruvate carboxykinase [Litopenaeus vannamei]	Q16822.3	RecName: Full=Phosphoenolpyruvate carboxykinase [GTP], mitochondrial; Short=PEPCK-M; Flags: Precursor	bfo:BRAFLDRAFT_68589	K01596	E4.1.1.32, pckA, PCK	phosphoenolpyruvate carboxykinase (GTP)	ko04920|ko00620|ko04922|ko00020|ko04152|ko04964|ko04910|ko04068|ko03320|ko04151|ko00010	Adipocytokine signaling pathway|Pyruvate metabolism|Glucagon signaling pathway|Citrate cycle (TCA cycle)|AMPK signaling pathway|Proximal tubule bicarbonate reclamation|Insulin signaling pathway|FoxO signaling pathway|PPAR signaling pathway|PI3K-Akt signaling pathway|Glycolysis / Gluconeogenesis	--	--	--	--	--	C	COG1274	Catalyzes the conversion of oxaloacetate (OAA) to phosphoenolpyruvate (PEP), the rate-limiting step in the metabolic pathway that produces glucose from lactate and other precursors derived from the citric acid cycle (By similarity)	Molecular Function: phosphoenolpyruvate carboxykinase (GTP) activity (GO:0004613);|Molecular Function: GTP binding (GO:0005525);|Biological Process: gluconeogenesis (GO:0006094);|Molecular Function: kinase activity (GO:0016301);|Biological Process: phosphorylation (GO:0016310);	--	--
i0_HQ_sampled12fd9_c375472_f10p0_302	--	--	--	--	--	--	--	--	--	--	--	--	--	--	--	--	--	--	--	--	--
i0_HQ_sampled12fd9_c375478_f3p0_631	--	--	--	--	--	--	--	--	--	--	--	--	--	--	--	--	--	--	--	--	--
i0_HQ_sampled12fd9_c375480_f17p0_666	--	--	--	--	--	--	--	--	--	--	--	--	--	--	--	--	--	--	--	--	--
i0_HQ_sampled12fd9_c375481_f14p0_383	--	--	--	--	--	--	--	--	--	--	--	--	--	--	--	--	--	--	--	--	--
i0_HQ_sampled12fd9_c375487_f13p0_758	gi|682331622|gb|AIN36963.1|	M15 protein [Cherax quadricarinatus]	O02387.1	RecName: Full=Larval cuticle protein LCP-17; Flags: Precursor	--	--	--	--	--	--	--	--	--	--	--	S	ENOG4110SY1	Cuticular protein RR-1 motif 12	--	--	--
i0_HQ_sampled12fd9_c375492_f22p0_756	--	--	--	--	--	--	--	--	--	--	--	--	--	--	--	--	--	--	--	--	--
i0_HQ_sampled12fd9_c375499_f4p0_510	gi|46240816|dbj|BAD15065.1|	crustin-like peptide type 4, partial [Marsupenaeus japonicus]	--	--	--	--	--	--	--	--	--	--	--	--	--	--	--	--	Cellular Component: extracellular region (GO:0005576);|Biological Process: negative regulation of peptidase activity (GO:0010466);|Molecular Function: peptidase inhibitor activity (GO:0030414);	--	--
i0_HQ_sampled12fd9_c375507_f24p0_258	--	--	--	--	--	--	--	--	--	--	--	--	--	--	--	--	--	--	--	--	--
i0_HQ_sampled12fd9_c375508_f11p0_673	gi|1036984435|ref|XP_017099318.1|	PREDICTED: uncharacterized protein LOC108127016 isoform X1 [Drosophila bipectinata]	--	--	--	--	--	--	--	--	--	--	--	--	--	S	ENOG4110X3U	CLECT	--	--	--
i0_HQ_sampled12fd9_c375512_f15p0_799	--	--	--	--	--	--	--	--	--	--	--	--	--	--	--	--	--	--	--	--	--
i0_HQ_sampled12fd9_c375514_f26p0_431	--	--	--	--	--	--	--	--	--	--	--	--	--	--	--	--	--	--	--	--	--
i0_HQ_sampled12fd9_c375515_f35p0_652	--	--	--	--	--	--	--	--	--	--	--	--	--	--	--	--	--	--	--	--	--
i0_HQ_sampled12fd9_c375516_f14p0_435	--	--	--	--	--	--	--	--	--	--	--	--	--	--	--	--	--	--	--	--	--
i0_HQ_sampled12fd9_c375518_f15p0_424	--	--	--	--	--	--	--	--	--	--	--	--	--	--	--	--	--	--	--	--	--
i0_HQ_sampled12fd9_c375520_f19p0_671	gi|207298827|gb|ACI23565.1|	skeletal muscle actin 2 [Homarus americanus]	P45521.1	RecName: Full=Actin	rro:104675775	K05692	ACTB_G1	actin beta/gamma 1	ko04145|ko04520|ko04670|ko04015|ko04390|ko04611|ko04391|ko04510|ko04745|ko04810|ko04530|ko04919|ko04210|ko04921	Phagosome|Adherens junction|Leukocyte transendothelial migration|Rap1 signaling pathway|Hippo signaling pathway|Platelet activation|Hippo signaling pathway - fly|Focal adhesion|Phototransduction - fly|Regulation of actin cytoskeleton|Tight junction|Thyroid hormone signaling pathway|Apoptosis|Oxytocin signaling pathway	KOG0676	Actin and related proteins	[Z]	CELLULAR PROCESSES AND SIGNALING	Cytoskeleton	Z	COG5277	Actin-related protein	Molecular Function: ATP binding (GO:0005524);	--	--
i0_HQ_sampled12fd9_c375522_f10p0_948	gi|3907620|gb|AAC78681.1|	actin 1 [Penaeus monodon]	P53501.1	RecName: Full=Actin-57B; Flags: Precursor	rro:104675775	K05692	ACTB_G1	actin beta/gamma 1	ko04145|ko04520|ko04670|ko04015|ko04390|ko04611|ko04391|ko04510|ko04745|ko04810|ko04530|ko04919|ko04210|ko04921	Phagosome|Adherens junction|Leukocyte transendothelial migration|Rap1 signaling pathway|Hippo signaling pathway|Platelet activation|Hippo signaling pathway - fly|Focal adhesion|Phototransduction - fly|Regulation of actin cytoskeleton|Tight junction|Thyroid hormone signaling pathway|Apoptosis|Oxytocin signaling pathway	KOG0676	Actin and related proteins	[Z]	CELLULAR PROCESSES AND SIGNALING	Cytoskeleton	Z	COG5277	Actin-related protein	Molecular Function: ATP binding (GO:0005524);	--	--
i0_HQ_sampled12fd9_c375524_f11p0_472	--	--	--	--	--	--	--	--	--	--	--	--	--	--	--	--	--	--	--	--	--
i0_HQ_sampled12fd9_c375525_f13p0_746	--	--	--	--	--	--	--	--	--	--	--	--	--	--	--	--	--	--	--	--	--
i0_HQ_sampled12fd9_c375526_f20p0_314	--	--	--	--	--	--	--	--	--	--	--	--	--	--	--	--	--	--	--	--	--
i0_HQ_sampled12fd9_c375527_f50p0_634	--	--	--	--	--	--	--	--	--	--	--	--	--	--	--	--	--	--	--	--	--
i0_HQ_sampled12fd9_c375529_f57p0_982	gi|190014502|emb|CAQ60115.1|	putative glyceraldehyde-3-phosphate dehydrogenase [Gammarus locusta]	P56649.1	RecName: Full=Glyceraldehyde-3-phosphate dehydrogenase; Short=GAPDH	sko:100370055	K00134	GAPDH, gapA	glyceraldehyde 3-phosphate dehydrogenase	ko00710|ko04066|ko01200|ko01230|ko00010	Carbon fixation in photosynthetic organisms|HIF-1 signaling pathway|Carbon metabolism|Biosynthesis of amino acids|Glycolysis / Gluconeogenesis	KOG0657	Glyceraldehyde 3-phosphate dehydrogenase	[G]	METABOLISM	Carbohydrate transport and metabolism	G	COG0057	glyceraldehyde3phosphate dehydrogenase	Molecular Function: glyceraldehyde-3-phosphate dehydrogenase (NAD+) (phosphorylating) activity (GO:0004365);|Biological Process: glucose metabolic process (GO:0006006);|Biological Process: glycolytic process (GO:0006096);|Molecular Function: NADP binding (GO:0050661);|Molecular Function: NAD binding (GO:0051287);|Biological Process: oxidation-reduction process (GO:0055114);	--	--
i0_HQ_sampled12fd9_c375530_f16p0_493	--	--	--	--	--	--	--	--	--	--	--	--	--	--	--	--	--	--	--	--	--
i0_HQ_sampled12fd9_c375531_f21p0_415	--	--	--	--	--	--	--	--	--	--	--	--	--	--	--	--	--	--	--	--	--
i0_HQ_sampled12fd9_c375534_f3p0_798	gi|1007784514|ref|XP_015829149.1|	PREDICTED: NADH dehydrogenase [ubiquinone] flavoprotein 1, mitochondrial [Nothobranchius furzeri]	P25708.2	RecName: Full=NADH dehydrogenase [ubiquinone] flavoprotein 1, mitochondrial; AltName: Full=Complex I-51kD; Short=CI-51kD; AltName: Full=NADH dehydrogenase flavoprotein 1; AltName: Full=NADH-ubiquinone oxidoreductase 51 kDa subunit; Flags: Precursor	dmo:Dmoj_GI13499	K03942	NDUFV1	NADH dehydrogenase (ubiquinone) flavoprotein 1	ko00190	Oxidative phosphorylation	--	--	--	--	--	C	COG1894	Nadh dehydrogenase	--	--	--
i0_HQ_sampled12fd9_c375535_f5p0_406	--	--	--	--	--	--	--	--	--	--	--	--	--	--	--	--	--	--	--	--	--
i0_HQ_sampled12fd9_c375536_f53p0_630	--	--	--	--	--	--	--	--	--	--	--	--	--	--	--	--	--	--	--	--	--
i0_HQ_sampled12fd9_c37553_f3p0_832	--	--	--	--	--	--	--	--	--	--	--	--	--	--	--	--	--	--	--	--	--
i0_HQ_sampled12fd9_c375541_f16p0_310	--	--	--	--	--	--	--	--	--	--	--	--	--	--	--	--	--	--	--	--	--
i0_HQ_sampled12fd9_c375543_f12p0_260	--	--	--	--	--	--	--	--	--	--	--	--	--	--	--	--	--	--	--	--	--
i0_HQ_sampled12fd9_c375544_f17p0_434	gi|1041111813|ref|XP_017279334.1|	PREDICTED: tubulin alpha chain [Kryptolebias marmoratus]	P30436.2	RecName: Full=Tubulin alpha chain; Contains: RecName: Full=Detyrosinated tubulin alpha chain	tru:101067763	K07374	TUBA	tubulin alpha	ko04540|ko04210|ko04145	Gap junction|Apoptosis|Phagosome	--	--	--	--	--	Z	COG5023	protein polymerization	--	--	--
i0_HQ_sampled12fd9_c375547_f10p0_515	gi|385100012|ref|YP_006234455.1|	ND2 gene product (mitochondrion) [Gammarus duebeni]	P29868.1	RecName: Full=NADH-ubiquinone oxidoreductase chain 2; AltName: Full=NADH dehydrogenase subunit 2	dsi:ND2	K03879	ND2	NADH-ubiquinone oxidoreductase chain 2	ko00190	Oxidative phosphorylation	--	--	--	--	--	C	COG1009	subunit l	Cellular Component: mitochondrion (GO:0005739);|Molecular Function: oxidoreductase activity (GO:0016491);|Cellular Component: membrane part (GO:0044425);|Biological Process: oxidation-reduction process (GO:0055114);	--	--
i0_HQ_sampled12fd9_c375549_f14p0_465	gi|332376787|gb|AEE63533.1|	unknown [Dendroctonus ponderosae]	Q27268.1	RecName: Full=ATP-dependent RNA helicase WM6; Short=DEAD box protein UAP56; Short=Dmrnahel; AltName: Full=HEL/UAP56	tca:662877	K12812	UAP56, BAT1, SUB2	ATP-dependent RNA helicase UAP56/SUB2	ko03040|ko03015|ko03013	Spliceosome|mRNA surveillance pathway|RNA transport	KOG0329	ATP-dependent RNA helicase	[A]	INFORMATION STORAGE AND PROCESSING	RNA processing and modification	L	COG0513	purine NTP-dependent helicase activity	Molecular Function: nucleic acid binding (GO:0003676);|Molecular Function: helicase activity (GO:0004386);|Molecular Function: ATP binding (GO:0005524);	--	--
i0_HQ_sampled12fd9_c375550_f41p0_810	gi|305690108|gb|ADM64456.1|	fatty acid binding protein [Eriocheir sinensis]	P24526.2	RecName: Full=Myelin P2 protein	--	--	--	--	--	--	--	--	--	--	--	I	ENOG4111US8	acid binding protein	--	--	--
i0_HQ_sampled12fd9_c375551_f34p0_570	--	--	--	--	--	--	--	--	--	--	--	--	--	--	--	--	--	--	--	--	--
i0_HQ_sampled12fd9_c375556_f15p0_237	--	--	--	--	--	--	--	--	--	--	--	--	--	--	--	--	--	--	--	--	--
i0_HQ_sampled12fd9_c375558_f22p0_275	--	--	--	--	--	--	--	--	--	--	--	--	--	--	--	--	--	--	--	--	--
i0_HQ_sampled12fd9_c375562_f23p0_541	--	--	--	--	--	--	--	--	--	--	--	--	--	--	--	--	--	--	--	--	--
i0_HQ_sampled12fd9_c375565_f22p0_472	gi|17223038|gb|AAL36896.1|AF430077_1	putative antimicrobial peptide [Litopenaeus setiferus]	--	--	--	--	--	--	--	--	--	--	--	--	--	--	--	--	--	--	--
i0_HQ_sampled12fd9_c375566_f36p0_591	--	--	--	--	--	--	--	--	--	--	--	--	--	--	--	--	--	--	--	--	--
i0_HQ_sampled12fd9_c375568_f15p0_487	--	--	--	--	--	--	--	--	--	--	--	--	--	--	--	--	--	--	--	--	--
i0_HQ_sampled12fd9_c375569_f15p0_324	--	--	--	--	--	--	--	--	--	--	--	--	--	--	--	--	--	--	--	--	--
i0_HQ_sampled12fd9_c375570_f18p0_352	--	--	--	--	--	--	--	--	--	--	--	--	--	--	--	--	--	--	--	--	--
i0_HQ_sampled12fd9_c375572_f26p0_330	--	--	--	--	--	--	--	--	--	--	--	--	--	--	--	--	--	--	--	--	--
i0_HQ_sampled12fd9_c375573_f26p0_615	--	--	--	--	--	--	--	--	--	--	--	--	--	--	--	--	--	--	--	--	--
i0_HQ_sampled12fd9_c375578_f15p0_413	--	--	--	--	--	--	--	--	--	--	--	--	--	--	--	--	--	--	--	--	--
i0_HQ_sampled12fd9_c375579_f14p0_528	--	--	A2V735.1	RecName: Full=Tropomyosin; AltName: Full=Tropomyosin, slow-tonic isoform; Short=Tm-Chio-tonic	--	--	--	--	--	--	--	--	--	--	--	--	--	--	--	--	--
i0_HQ_sampled12fd9_c375580_f12p0_361	gi|47217896|emb|CAG05018.1|	unnamed protein product, partial [Tetraodon nigroviridis]	Q98SP8.2	RecName: Full=Embryonic polyadenylate-binding protein A; Short=Embryonic poly(A)-binding protein A; Short=ePAB-A; Short=ePABP-A; AltName: Full=XePABP-A	tru:101075227	K13126	PABPC	polyadenylate-binding protein	ko03018|ko03015|ko03013	RNA degradation|mRNA surveillance pathway|RNA transport	KOG0123	Polyadenylate-binding protein (RRM superfamily)	[AJ]	INFORMATION STORAGE AND PROCESSING|INFORMATION STORAGE AND PROCESSING	RNA processing and modification |Translation, ribosomal structure and biogenesis	S	ENOG410XR5X	poly(A) binding protein, cytoplasmic	--	--	--
i0_HQ_sampled12fd9_c375581_f23p0_276	gi|722490040|ref|YP_009107166.1|	NADH dehydrogenase subunit 5 (mitochondrion) [Eulimnogammarus vittatus]	--	--	--	--	--	--	--	--	--	--	--	--	--	--	--	--	Cellular Component: membrane (GO:0016020);	--	--
i0_HQ_sampled12fd9_c375583_f17p0_874	gi|385100011|ref|YP_006234454.1|	ND1 gene product (mitochondrion) [Gammarus duebeni]	B0FWD8.1	RecName: Full=NADH-ubiquinone oxidoreductase chain 1; AltName: Full=NADH dehydrogenase subunit 1	cqu:ND1	K03878	ND1	NADH-ubiquinone oxidoreductase chain 1	ko00190	Oxidative phosphorylation	--	--	--	--	--	C	COG1005	NDH-1 shuttles electrons from NADH, via FMN and iron- sulfur (Fe-S) centers, to quinones in the respiratory chain. The immediate electron acceptor for the enzyme in this species is believed to be ubiquinone. Couples the redox reaction to proton translocation (for every two electrons transferred, four hydrogen ions are translocated across the cytoplasmic membrane), and thus conserves the redox ene…	Cellular Component: mitochondrial inner membrane (GO:0005743);|Molecular Function: NADH dehydrogenase (ubiquinone) activity (GO:0008137);|Cellular Component: integral component of membrane (GO:0016021);|Biological Process: oxidation-reduction process (GO:0055114);	--	--
i0_HQ_sampled12fd9_c375586_f31p0_657	gi|385100010|ref|YP_006234453.1|	CYTB gene product (mitochondrion) [Gammarus duebeni]	Q9MFN9.1	RecName: Full=Cytochrome b; AltName: Full=Complex III subunit 3; AltName: Full=Complex III subunit III; AltName: Full=Cytochrome b-c1 complex subunit 3; AltName: Full=Ubiquinol-cytochrome-c reductase complex cytochrome b subunit	dse:CYTB	K00412	CYTB, petB	ubiquinol-cytochrome c reductase cytochrome b subunit	ko00190|ko02020|ko04260	Oxidative phosphorylation|Two-component system|Cardiac muscle contraction	--	--	--	--	--	C	COG1290	Component of the ubiquinol-cytochrome c reductase complex (complex III or cytochrome b-c1 complex), which is a respiratory chain that generates an electrochemical potential coupled to ATP synthesis (By similarity)	Cellular Component: mitochondrial inner membrane (GO:0005743);|Biological Process: mitochondrial electron transport, ubiquinol to cytochrome c (GO:0006122);|Molecular Function: ubiquinol-cytochrome-c reductase activity (GO:0008121);|Molecular Function: electron transfer activity (GO:0009055);|Cellular Component: respiratory chain complex III (GO:0045275);|Molecular Function: metal ion binding (GO…	--	--
i0_HQ_sampled12fd9_c375587_f38p0_710	--	--	--	--	--	--	--	--	--	--	--	--	--	--	--	--	--	--	--	--	--
i0_HQ_sampled12fd9_c375588_f13p0_241	--	--	--	--	--	--	--	--	--	--	--	--	--	--	--	--	--	--	--	--	--
i0_HQ_sampled12fd9_c375591_f14p0_271	--	--	--	--	--	--	--	--	--	--	--	--	--	--	--	--	--	--	--	--	--
i0_HQ_sampled12fd9_c375592_f10p0_451	--	--	--	--	--	--	--	--	--	--	--	--	--	--	--	--	--	--	--	--	--
i0_HQ_sampled12fd9_c375594_f10p0_447	--	--	--	--	--	--	--	--	--	--	--	--	--	--	--	--	--	--	--	--	--
i0_HQ_sampled12fd9_c375596_f10p0_397	--	--	--	--	--	--	--	--	--	--	--	--	--	--	--	--	--	--	--	--	--
i0_HQ_sampled12fd9_c375641_f2p0_421	--	--	--	--	--	--	--	--	--	--	--	--	--	--	--	--	--	--	--	--	--
i0_HQ_sampled12fd9_c375643_f7p0_723	--	--	--	--	--	--	--	--	--	--	--	--	--	--	--	--	--	--	--	--	--
i0_HQ_sampled12fd9_c375646_f7p0_642	--	--	--	--	--	--	--	--	--	--	--	--	--	--	--	--	--	--	--	--	--
i0_HQ_sampled12fd9_c37564_f3p0_550	--	--	--	--	--	--	--	--	--	--	--	--	--	--	--	--	--	--	--	--	--
i0_HQ_sampled12fd9_c375669_f2p0_368	--	--	--	--	--	--	--	--	--	--	--	--	--	--	--	--	--	--	--	--	--
i0_HQ_sampled12fd9_c375677_f5p0_544	--	--	--	--	--	--	--	--	--	--	--	--	--	--	--	--	--	--	--	--	--
i0_HQ_sampled12fd9_c375679_f2p0_390	--	--	--	--	--	--	--	--	--	--	--	--	--	--	--	--	--	--	--	--	--
i0_HQ_sampled12fd9_c375693_f2p0_352	--	--	--	--	--	--	--	--	--	--	--	--	--	--	--	--	--	--	--	--	--
i0_HQ_sampled12fd9_c375702_f3p0_290	--	--	--	--	--	--	--	--	--	--	--	--	--	--	--	--	--	--	--	--	--
i0_HQ_sampled12fd9_c375705_f7p0_814	gi|131573332|gb|ABO33174.1|	serine protease-like protein 3 [Penaeus monodon]	Q8SQ23.1	RecName: Full=Tissue-type plasminogen activator; Short=t-PA; Short=t-plasminogen activator; Short=tPA; Contains: RecName: Full=Tissue-type plasminogen activator chain A; Contains: RecName: Full=Tissue-type plasminogen activator chain B; Flags: Precursor	--	--	--	--	--	--	--	--	--	--	--	O	COG5640	protease	Molecular Function: peptidase activity (GO:0008233);	--	--
i0_HQ_sampled12fd9_c375720_f4p0_632	--	--	--	--	--	--	--	--	--	--	--	--	--	--	--	--	--	--	--	--	--
i0_HQ_sampled12fd9_c375731_f8p0_860	gi|186969143|gb|ACC97407.1|	gastrolith protein [Cherax quadricarinatus]	--	--	--	--	--	--	--	--	--	--	--	--	--	S	ENOG410XX7G	chitin deacetylase activity	Molecular Function: catalytic activity (GO:0003824);|Biological Process: organic substance metabolic process (GO:0071704);	--	--
i0_HQ_sampled12fd9_c375735_f4p0_586	--	--	--	--	--	--	--	--	--	--	--	--	--	--	--	--	--	--	--	--	--
i0_HQ_sampled12fd9_c375742_f6p0_479	--	--	--	--	--	--	--	--	--	--	--	--	--	--	--	--	--	--	--	--	--
i0_HQ_sampled12fd9_c375748_f7p0_686	--	--	--	--	--	--	--	--	--	--	--	--	--	--	--	--	--	--	--	--	--
i0_HQ_sampled12fd9_c375749_f3p0_284	--	--	--	--	--	--	--	--	--	--	--	--	--	--	--	--	--	--	--	--	--
i0_HQ_sampled12fd9_c375766_f8p0_619	--	--	--	--	--	--	--	--	--	--	--	--	--	--	--	--	--	--	--	--	--
i0_HQ_sampled12fd9_c375769_f3p0_703	--	--	--	--	--	--	--	--	--	--	--	--	--	--	--	--	--	--	--	--	--
i0_HQ_sampled12fd9_c375770_f2p0_339	--	--	--	--	--	--	--	--	--	--	--	--	--	--	--	--	--	--	--	--	--
i0_HQ_sampled12fd9_c375772_f4p0_454	--	--	--	--	--	--	--	--	--	--	--	--	--	--	--	--	--	--	--	--	--
i0_HQ_sampled12fd9_c375785_f2p0_347	--	--	--	--	--	--	--	--	--	--	--	--	--	--	--	--	--	--	--	--	--
i0_HQ_sampled12fd9_c375791_f3p0_348	--	--	--	--	--	--	--	--	--	--	--	--	--	--	--	--	--	--	--	--	--
i0_HQ_sampled12fd9_c375800_f3p0_662	--	--	--	--	--	--	--	--	--	--	--	--	--	--	--	--	--	--	--	--	--
i0_HQ_sampled12fd9_c375819_f5p0_526	gi|926635365|ref|XP_013783567.1|	PREDICTED: NADH dehydrogenase [ubiquinone] 1 alpha subcomplex subunit 10, mitochondrial-like [Limulus polyphemus]	P91929.2	RecName: Full=NADH dehydrogenase [ubiquinone] 1 alpha subcomplex subunit 10, mitochondrial; AltName: Full=Complex I-42kD; Short=CI-42kD; AltName: Full=NADH-ubiquinone oxidoreductase 42 kDa subunit; Flags: Precursor	tca:660535	K03954	NDUFA10	NADH dehydrogenase (ubiquinone) 1 alpha subcomplex subunit 10	ko00190	Oxidative phosphorylation	--	--	--	--	--	--	--	--	--	--	--
i0_HQ_sampled12fd9_c375820_f4p0_556	--	--	--	--	--	--	--	--	--	--	--	--	--	--	--	--	--	--	--	--	--
i0_HQ_sampled12fd9_c375824_f4p0_432	--	--	--	--	--	--	--	--	--	--	--	--	--	--	--	--	--	--	--	--	--
i0_HQ_sampled12fd9_c375836_f6p0_707	gi|62484806|emb|CAI78901.1|	hemocyanin subunit 1 [Gammarus roeselii]	P04254.2	RecName: Full=Hemocyanin A chain	--	--	--	--	--	--	--	--	--	--	--	S	ENOG410XR2D	Larval storage protein (LSP) which may serve as a store of amino acids for synthesis of adult proteins	Molecular Function: oxidoreductase activity (GO:0016491);|Molecular Function: metal ion binding (GO:0046872);|Biological Process: oxidation-reduction process (GO:0055114);	--	--
i0_HQ_sampled12fd9_c375842_f2p0_377	--	--	--	--	--	--	--	--	--	--	--	--	--	--	--	--	--	--	--	--	--
i0_HQ_sampled12fd9_c375847_f5p0_510	--	--	--	--	--	--	--	--	--	--	--	--	--	--	--	--	--	--	--	--	--
i0_HQ_sampled12fd9_c375848_f2p0_567	--	--	--	--	--	--	--	--	--	--	--	--	--	--	--	--	--	--	--	--	--
i0_HQ_sampled12fd9_c375868_f2p0_269	--	--	--	--	--	--	--	--	--	--	--	--	--	--	--	--	--	--	--	--	--
i0_HQ_sampled12fd9_c375872_f4p0_789	gi|915667685|gb|KOC69463.1|	Coatomer subunit zeta-1 [Habropoda laboriosa]	P35604.2	RecName: Full=Coatomer subunit zeta-1; AltName: Full=Zeta-1-coat protein; Short=Zeta-1 COP	cfo:105258445	K20472	COPZ, RET3	coatomer subunit zeta	--	--	--	--	--	--	--	U	COG5541	vesicle-mediated transport	Biological Process: protein transport (GO:0015031);	--	--
i0_HQ_sampled12fd9_c375927_f6p0_434	--	--	--	--	--	--	--	--	--	--	--	--	--	--	--	--	--	--	--	--	--
i0_HQ_sampled12fd9_c375934_f4p0_976	--	--	--	--	--	--	--	--	--	--	--	--	--	--	--	--	--	--	--	--	--
i0_HQ_sampled12fd9_c375939_f2p0_613	--	--	--	--	--	--	--	--	--	--	--	--	--	--	--	--	--	--	--	--	--
i0_HQ_sampled12fd9_c375955_f2p0_641	--	--	--	--	--	--	--	--	--	--	--	--	--	--	--	--	--	--	--	--	--
i0_HQ_sampled12fd9_c375963_f4p0_817	gi|926638810|ref|XP_013785438.1|	PREDICTED: proteasome subunit alpha type-5-like [Limulus polyphemus]	Q9Z2U1.1	RecName: Full=Proteasome subunit alpha type-5; AltName: Full=Macropain zeta chain; AltName: Full=Multicatalytic endopeptidase complex zeta chain; AltName: Full=Proteasome zeta chain	soc:105193030	K02729	PSMA5	20S proteasome subunit alpha 5	ko03050	Proteasome	KOG0176	20S proteasome, regulatory subunit alpha type PSMA5/PUP2	[O]	CELLULAR PROCESSES AND SIGNALING	Posttranslational modification, protein turnover, chaperones	O	COG0638	The proteasome is a multicatalytic proteinase complex which is characterized by its ability to cleave peptides with Arg, Phe, Tyr, Leu, and Glu adjacent to the leaving group at neutral or slightly basic pH. The proteasome has an ATP-dependent proteolytic activity (By similarity)	--	--	--
i0_HQ_sampled12fd9_c375974_f3p0_411	--	--	--	--	--	--	--	--	--	--	--	--	--	--	--	--	--	--	--	--	--
i0_HQ_sampled12fd9_c375976_f3p0_436	--	--	--	--	--	--	--	--	--	--	--	--	--	--	--	--	--	--	--	--	--
i0_HQ_sampled12fd9_c375980_f4p0_523	gi|952530021|gb|KRT83350.1|	ribosomal protein, partial [Oryctes borbonicus]	Q9BMX5.1	RecName: Full=40S ribosomal protein S6	tca:656796	K02991	RP-S6e, RPS6	small subunit ribosomal protein S6e	ko03010|ko04066|ko04910|ko04151|ko04150	Ribosome|HIF-1 signaling pathway|Insulin signaling pathway|PI3K-Akt signaling pathway|mTOR signaling pathway	--	--	--	--	--	J	COG2125	40s ribosomal protein s6	Molecular Function: structural constituent of ribosome (GO:0003735);|Cellular Component: ribosome (GO:0005840);|Biological Process: translation (GO:0006412);	--	--
i0_HQ_sampled12fd9_c375983_f3p0_363	--	--	--	--	--	--	--	--	--	--	--	--	--	--	--	--	--	--	--	--	--
i0_HQ_sampled12fd9_c375987_f4p0_332	--	--	--	--	--	--	--	--	--	--	--	--	--	--	--	--	--	--	--	--	--
i0_HQ_sampled12fd9_c376007_f4p0_533	--	--	--	--	--	--	--	--	--	--	--	--	--	--	--	--	--	--	--	--	--
i0_HQ_sampled12fd9_c376010_f3p0_405	--	--	--	--	--	--	--	--	--	--	--	--	--	--	--	--	--	--	--	--	--
i0_HQ_sampled12fd9_c376016_f5p0_614	--	--	--	--	--	--	--	--	--	--	--	--	--	--	--	--	--	--	--	--	--
i0_HQ_sampled12fd9_c376017_f4p0_567	--	--	--	--	--	--	--	--	--	--	--	--	--	--	--	--	--	--	--	--	--
i0_HQ_sampled12fd9_c376031_f4p0_571	gi|907752323|ref|XP_013118167.1|	PREDICTED: succinate dehydrogenase [ubiquinone] iron-sulfur subunit, mitochondrial-like, partial [Stomoxys calcitrans]	P21914.2	RecName: Full=Succinate dehydrogenase [ubiquinone] iron-sulfur subunit, mitochondrial; AltName: Full=Iron-sulfur subunit of complex II; Short=Ip; Flags: Precursor	mde:101899606	K00235	SDHB, SDH2	succinate dehydrogenase (ubiquinone) iron-sulfur subunit	ko01200|ko00190|ko00020	Carbon metabolism|Oxidative phosphorylation|Citrate cycle (TCA cycle)	--	--	--	--	--	C	COG0479	succinate dehydrogenase	--	--	--
i0_HQ_sampled12fd9_c376077_f3p0_347	--	--	--	--	--	--	--	--	--	--	--	--	--	--	--	--	--	--	--	--	--
i0_HQ_sampled12fd9_c376079_f3p0_925	--	--	--	--	--	--	--	--	--	--	--	--	--	--	--	--	--	--	--	--	--
i0_HQ_sampled12fd9_c376083_f5p0_426	gi|321461230|gb|EFX72264.1|	hypothetical protein DAPPUDRAFT_189030 [Daphnia pulex]	Q4R5B8.1	RecName: Full=Eukaryotic translation initiation factor 3 subunit F; Short=eIF3f; AltName: Full=Deubiquitinating enzyme eIF3f; AltName: Full=Eukaryotic translation initiation factor 3 subunit 5; AltName: Full=eIF-3-epsilon; AltName: Full=eIF3 p47	ame:413145	K03249	EIF3F	translation initiation factor 3 subunit F	ko03013	RNA transport	--	--	--	--	--	S	COG1310	Component of the eukaryotic translation initiation factor 3 (eIF-3) complex, which is involved in protein synthesis and, together with other initiation factors, stimulates binding of mRNA and methionyl-tRNAi to the 40S ribosome (By similarity)	Molecular Function: translation initiation factor activity (GO:0003743);|Biological Process: translational initiation (GO:0006413);|Molecular Function: translation initiation factor binding (GO:0031369);|Cellular Component: eukaryotic translation initiation factor 3 complex, eIF3m (GO:0071541);	--	--
i0_HQ_sampled12fd9_c376088_f3p0_519	--	--	--	--	--	--	--	--	--	--	--	--	--	--	--	--	--	--	--	--	--
i0_HQ_sampled12fd9_c376090_f4p0_571	--	--	--	--	--	--	--	--	--	--	--	--	--	--	--	--	--	--	--	--	--
i0_HQ_sampled12fd9_c376092_f5p0_768	--	--	--	--	--	--	--	--	--	--	--	--	--	--	--	--	--	--	--	--	--
i0_HQ_sampled12fd9_c376103_f4p0_366	--	--	--	--	--	--	--	--	--	--	--	--	--	--	--	--	--	--	--	--	--
i0_HQ_sampled12fd9_c376105_f4p0_970	--	--	--	--	--	--	--	--	--	--	--	--	--	--	--	--	--	--	--	--	--
i0_HQ_sampled12fd9_c376107_f2p0_520	gi|1007760089|ref|XP_015819260.1|	PREDICTED: histone H3.3 isoform X1 [Nothobranchius furzeri]	P84245.2	RecName: Full=Histone H3.3	--	--	--	--	--	--	--	--	--	--	--	B	COG2036	Core component of nucleosome. Nucleosomes wrap and compact DNA into chromatin, limiting DNA accessibility to the cellular machineries which require DNA as a template. Histones thereby play a central role in transcription regulation, DNA repair, DNA replication and chromosomal stability. DNA accessibility is regulated via a complex set of post-translational modifications of histones, also called h…	--	--	--
i0_HQ_sampled12fd9_c376109_f3p0_500	--	--	--	--	--	--	--	--	--	--	--	--	--	--	--	--	--	--	--	--	--
i0_HQ_sampled12fd9_c376112_f3p0_658	--	--	--	--	--	--	--	--	--	--	--	--	--	--	--	--	--	--	--	--	--
i0_HQ_sampled12fd9_c376130_f3p0_659	--	--	--	--	--	--	--	--	--	--	--	--	--	--	--	--	--	--	--	--	--
i0_HQ_sampled12fd9_c376149_f2p0_447	--	--	--	--	--	--	--	--	--	--	--	--	--	--	--	--	--	--	--	--	--
i0_HQ_sampled12fd9_c376150_f5p0_519	--	--	--	--	--	--	--	--	--	--	--	--	--	--	--	--	--	--	--	--	--
i0_HQ_sampled12fd9_c376160_f2p0_237	--	--	--	--	--	--	--	--	--	--	--	--	--	--	--	--	--	--	--	--	--
i0_HQ_sampled12fd9_c376164_f4p0_618	--	--	--	--	--	--	--	--	--	--	--	--	--	--	--	--	--	--	--	--	--
i0_HQ_sampled12fd9_c376170_f4p0_275	--	--	--	--	--	--	--	--	--	--	--	--	--	--	--	--	--	--	--	--	--
i0_HQ_sampled12fd9_c376174_f6p0_584	gi|942327681|gb|JAN45773.1|	putative ATP synthase subunit alpha, mitochondrial [Daphnia magna]	P35381.2	RecName: Full=ATP synthase subunit alpha, mitochondrial; AltName: Full=Protein bellwether; Flags: Precursor	bmor:692926	K02132	ATPeF1A, ATP5A1, ATP1	F-type H+-transporting ATPase subunit alpha	ko00190	Oxidative phosphorylation	--	--	--	--	--	C	COG0056	Produces ATP from ADP in the presence of a proton gradient across the membrane. The alpha chain is a regulatory subunit (By similarity)	Molecular Function: ATP binding (GO:0005524);|Biological Process: ATP synthesis coupled proton transport (GO:0015986);|Biological Process: ATP hydrolysis coupled proton transport (GO:0015991);|Cellular Component: proton-transporting ATP synthase complex, catalytic core F(1) (GO:0045261);|Molecular Function: proton-transporting ATP synthase activity, rotational mechanism (GO:0046933);|Molecular Fu…	--	--
i0_HQ_sampled12fd9_c376180_f3p0_299	gi|262401289|gb|ACY66547.1|	ribosomal protein L5, partial [Scylla paramamosain]	O65353.1	RecName: Full=60S ribosomal protein L5	tca:103312128	K02932	RP-L5e, RPL5	large subunit ribosomal protein L5e	ko03010	Ribosome	--	--	--	--	--	J	COG0256	This is one of the proteins that binds and probably mediates the attachment of the 5S RNA into the large ribosomal subunit, where it forms part of the central protuberance (By similarity)	Cellular Component: intracellular (GO:0005622);	--	--
i0_HQ_sampled12fd9_c376181_f3p0_367	--	--	--	--	--	--	--	--	--	--	--	--	--	--	--	--	--	--	--	--	--
i0_HQ_sampled12fd9_c376194_f2p0_738	--	--	--	--	--	--	--	--	--	--	--	--	--	--	--	--	--	--	--	--	--
i0_HQ_sampled12fd9_c376212_f3p0_473	--	--	--	--	--	--	--	--	--	--	--	--	--	--	--	--	--	--	--	--	--
i0_HQ_sampled12fd9_c376213_f4p0_864	gi|260832169|ref|XP_002611030.1|	hypothetical protein BRAFLDRAFT_283521 [Branchiostoma floridae]	Q9V3H2.1	RecName: Full=26S proteasome non-ATPase regulatory subunit 14; AltName: Full=26S proteasome regulatory complex subunit p37B; AltName: Full=26S proteasome regulatory subunit rpn11; AltName: Full=Yippee-interacting protein 5	bfo:BRAFLDRAFT_283521	K03030	PSMD14, RPN11, POH1	26S proteasome regulatory subunit N11	ko03050	Proteasome	--	--	--	--	--	S	COG1310	Component of the eukaryotic translation initiation factor 3 (eIF-3) complex, which is involved in protein synthesis and, together with other initiation factors, stimulates binding of mRNA and methionyl-tRNAi to the 40S ribosome (By similarity)	--	--	--
i0_HQ_sampled12fd9_c376225_f4p0_826	gi|108773740|gb|ABG11961.1|	tail muscle elongation factor 1 gamma [Procambarus clarkii]	P12261.3	RecName: Full=Elongation factor 1-gamma; Short=EF-1-gamma; AltName: Full=eEF-1B gamma	--	--	--	--	--	--	--	--	--	--	--	O	COG0625	glutathione Stransferase	Molecular Function: translation elongation factor activity (GO:0003746);|Biological Process: translational elongation (GO:0006414);	--	--
i0_HQ_sampled12fd9_c376235_f3p0_406	--	--	--	--	--	--	--	--	--	--	--	--	--	--	--	--	--	--	--	--	--
i0_HQ_sampled12fd9_c376242_f6p0_588	--	--	--	--	--	--	--	--	--	--	--	--	--	--	--	--	--	--	--	--	--
i0_HQ_sampled12fd9_c37631_f4p2_687	--	--	--	--	--	--	--	--	--	--	--	--	--	--	--	--	--	--	--	--	--
i0_HQ_sampled12fd9_c376485_f3p0_389	--	--	--	--	--	--	--	--	--	--	--	--	--	--	--	--	--	--	--	--	--
i0_HQ_sampled12fd9_c377336_f2p0_237	--	--	--	--	--	--	--	--	--	--	--	--	--	--	--	--	--	--	--	--	--
i0_HQ_sampled12fd9_c377599_f6p0_664	--	--	--	--	--	--	--	--	--	--	--	--	--	--	--	--	--	--	--	--	--
i0_HQ_sampled12fd9_c3775_f11p0_747	gi|646720181|gb|KDR22009.1|	hypothetical protein L798_03032 [Zootermopsis nevadensis]	--	--	tca:662710	K03938	NDUFS5	NADH dehydrogenase (ubiquinone) Fe-S protein 5	ko00190	Oxidative phosphorylation	--	--	--	--	--	C	ENOG41123TD	NADH dehydrogenase (Ubiquinone) Fe-S protein 5, 15kDa (NADH-coenzyme Q reductase)	--	--	--
i0_HQ_sampled12fd9_c377814_f3p0_268	--	--	--	--	--	--	--	--	--	--	--	--	--	--	--	--	--	--	--	--	--
i0_HQ_sampled12fd9_c3781_f3p0_345	--	--	--	--	--	--	--	--	--	--	--	--	--	--	--	--	--	--	--	--	--
i0_HQ_sampled12fd9_c3784_f3p0_792	--	--	--	--	--	--	--	--	--	--	--	--	--	--	--	--	--	--	--	--	--
i0_HQ_sampled12fd9_c378918_f3p0_521	--	--	--	--	--	--	--	--	--	--	--	--	--	--	--	--	--	--	--	--	--
i0_HQ_sampled12fd9_c37912_f3p31_455	--	--	--	--	--	--	--	--	--	--	--	--	--	--	--	--	--	--	--	--	--
i0_HQ_sampled12fd9_c37920_f2p0_802	--	--	--	--	--	--	--	--	--	--	--	--	--	--	--	--	--	--	--	--	--
i0_HQ_sampled12fd9_c379457_f4p0_807	gi|985388854|ref|XP_015379006.1|	PREDICTED: NADH-ubiquinone oxidoreductase 75 kDa subunit, mitochondrial [Diuraphis noxia]	Q66HF1.1	RecName: Full=NADH-ubiquinone oxidoreductase 75 kDa subunit, mitochondrial; Flags: Precursor	api:100162912	K03934	NDUFS1	NADH dehydrogenase (ubiquinone) Fe-S protein 1	ko00190	Oxidative phosphorylation	--	--	--	--	--	C	COG1034	subunit g	--	--	--
i0_HQ_sampled12fd9_c37972_f2p0_921	--	--	--	--	--	--	--	--	--	--	--	--	--	--	--	--	--	--	--	--	--
i0_HQ_sampled12fd9_c38032_f2p7_469	--	--	--	--	--	--	--	--	--	--	--	--	--	--	--	--	--	--	--	--	--
i0_HQ_sampled12fd9_c38046_f6p0_422	--	--	--	--	--	--	--	--	--	--	--	--	--	--	--	--	--	--	--	--	--
i0_HQ_sampled12fd9_c381002_f2p0_253	--	--	--	--	--	--	--	--	--	--	--	--	--	--	--	--	--	--	--	--	--
i0_HQ_sampled12fd9_c381548_f2p0_584	--	--	--	--	--	--	--	--	--	--	--	--	--	--	--	--	--	--	--	--	--
i0_HQ_sampled12fd9_c38185_f5p16_372	--	--	--	--	--	--	--	--	--	--	--	--	--	--	--	--	--	--	--	--	--
i0_HQ_sampled12fd9_c38193_f4p4_464	--	--	--	--	--	--	--	--	--	--	--	--	--	--	--	--	--	--	--	--	--
i0_HQ_sampled12fd9_c381975_f3p0_305	--	--	--	--	--	--	--	--	--	--	--	--	--	--	--	--	--	--	--	--	--
i0_HQ_sampled12fd9_c38250_f6p0_405	gi|357620570|gb|EHJ72719.1|	mitochondrial ribosomal protein S21 [Danaus plexippus]	--	--	pxy:105393400	K02970	RP-S21, MRPS21, rpsU	small subunit ribosomal protein S21	ko03010	Ribosome	--	--	--	--	--	J	ENOG4111YFB	Ribosomal protein S21	Molecular Function: structural constituent of ribosome (GO:0003735);|Cellular Component: ribosome (GO:0005840);|Biological Process: translation (GO:0006412);	--	--
i0_HQ_sampled12fd9_c38262_f3p0_688	gi|943944417|ref|XP_014355560.1|	PREDICTED: proteasome maturation protein [Papilio machaon]	--	--	pxy:105389510	K11599	POMP, UMP1	proteasome maturation protein	ko03050	Proteasome	--	--	--	--	--	--	--	--	--	--	--
i0_HQ_sampled12fd9_c383059_f8p0_956	--	--	--	--	--	--	--	--	--	--	--	--	--	--	--	--	--	--	--	--	--
i0_HQ_sampled12fd9_c38326_f2p1_649	--	--	--	--	--	--	--	--	--	--	--	--	--	--	--	--	--	--	--	--	--
i0_HQ_sampled12fd9_c383282_f4p0_901	--	--	--	--	--	--	--	--	--	--	--	--	--	--	--	--	--	--	--	--	--
i0_HQ_sampled12fd9_c38347_f3p1_410	--	--	--	--	--	--	--	--	--	--	--	--	--	--	--	--	--	--	--	--	--
i0_HQ_sampled12fd9_c38368_f3p0_882	--	--	--	--	--	--	--	--	--	--	--	--	--	--	--	--	--	--	--	--	--
i0_HQ_sampled12fd9_c383964_f2p0_750	--	--	--	--	--	--	--	--	--	--	--	--	--	--	--	--	--	--	--	--	--
i0_HQ_sampled12fd9_c38400_f2p0_987	gi|831502014|ref|XP_012710993.1|	PREDICTED: apolipoprotein D-like [Fundulus heteroclitus]	P58989.1	RecName: Full=Crustacyanin-A1 subunit	mde:101897456	K03098	APOD	apolipoprotein D and lipocalin family protein	--	--	--	--	--	--	--	M	COG3040	Outer membrane lipoprotein	--	--	--
i0_HQ_sampled12fd9_c38502_f2p0_650	--	--	--	--	--	--	--	--	--	--	--	--	--	--	--	--	--	--	--	--	--
i0_HQ_sampled12fd9_c385488_f4p0_871	--	--	--	--	--	--	--	--	--	--	--	--	--	--	--	--	--	--	--	--	--
i0_HQ_sampled12fd9_c38563_f3p0_904	gi|506442430|gb|AGM14510.1|	long-wavelength opsin, partial [Gammarus minus]	O16020.1	RecName: Full=Rhodopsin	ame:413961	K04255	OPN4, Rh2_7	r-opsin	--	--	--	--	--	--	--	U	ENOG410XRW9	Receptor	Molecular Function: G-protein coupled receptor activity (GO:0004930);|Biological Process: G-protein coupled receptor signaling pathway (GO:0007186);|Biological Process: phototransduction (GO:0007602);|Cellular Component: integral component of membrane (GO:0016021);	--	--
i0_HQ_sampled12fd9_c38688_f2p0_559	--	--	--	--	--	--	--	--	--	--	--	--	--	--	--	--	--	--	--	--	--
i0_HQ_sampled12fd9_c3871_f2p0_478	--	--	--	--	--	--	--	--	--	--	--	--	--	--	--	--	--	--	--	--	--
i0_HQ_sampled12fd9_c38738_f3p1_391	gi|209972750|gb|ACJ03792.1|	ubiquitin-conjugating enzyme E2 [Scylla paramamosain]	Q9W6H5.1	RecName: Full=SUMO-conjugating enzyme UBC9-A; AltName: Full=RING-type E3 SUMO transferase UBC9-A; AltName: Full=SUMO-protein ligase A; AltName: Full=Ubiquitin carrier protein 9-A; AltName: Full=Ubiquitin carrier protein I-A; AltName: Full=Ubiquitin-conjugating enzyme E2 I-A; AltName: Full=Ubiquitin-protein ligase I-A	api:100145842	K10577	UBE2I, UBC9	ubiquitin-conjugating enzyme E2 I	ko04120|ko03013|ko04064	Ubiquitin mediated proteolysis|RNA transport|NF-kappa B signaling pathway	KOG0424	Ubiquitin-protein ligase	[O]	CELLULAR PROCESSES AND SIGNALING	Posttranslational modification, protein turnover, chaperones	O	COG5078	ubiquitin-conjugating enzyme	Molecular Function: ATP binding (GO:0005524);|Biological Process: protein sumoylation (GO:0016925);|Molecular Function: SUMO transferase activity (GO:0019789);	--	--
i0_HQ_sampled12fd9_c387920_f4p0_502	--	--	--	--	--	--	--	--	--	--	--	--	--	--	--	--	--	--	--	--	--
i0_HQ_sampled12fd9_c387_f41p0_593	gi|1041129544|ref|XP_017289092.1|	PREDICTED: type-2 ice-structuring protein-like isoform X2 [Kryptolebias marmoratus]	--	--	bfo:BRAFLDRAFT_69088	K06560	MRC	mannose receptor, C type	ko04145	Phagosome	--	--	--	--	--	S	ENOG410XPJ1	c-type lectin domain family	--	--	--
i0_HQ_sampled12fd9_c38823_f2p16_309	--	--	--	--	--	--	--	--	--	--	--	--	--	--	--	--	--	--	--	--	--
i0_HQ_sampled12fd9_c38868_f2p0_636	--	--	--	--	--	--	--	--	--	--	--	--	--	--	--	--	--	--	--	--	--
i0_HQ_sampled12fd9_c388826_f3p0_593	--	--	--	--	--	--	--	--	--	--	--	--	--	--	--	--	--	--	--	--	--
i0_HQ_sampled12fd9_c389437_f2p0_706	--	--	--	--	--	--	--	--	--	--	--	--	--	--	--	--	--	--	--	--	--
i0_HQ_sampled12fd9_c38953_f2p0_920	--	--	--	--	--	--	--	--	--	--	--	--	--	--	--	--	--	--	--	--	--
i0_HQ_sampled12fd9_c39001_f2p7_304	--	--	--	--	--	--	--	--	--	--	--	--	--	--	--	--	--	--	--	--	--
i0_HQ_sampled12fd9_c390537_f6p0_498	--	--	--	--	--	--	--	--	--	--	--	--	--	--	--	--	--	--	--	--	--
i0_HQ_sampled12fd9_c39062_f3p0_860	--	--	--	--	--	--	--	--	--	--	--	--	--	--	--	--	--	--	--	--	--
i0_HQ_sampled12fd9_c390846_f2p0_350	--	--	--	--	--	--	--	--	--	--	--	--	--	--	--	--	--	--	--	--	--
i0_HQ_sampled12fd9_c39136_f2p0_490	--	--	--	--	--	--	--	--	--	--	--	--	--	--	--	--	--	--	--	--	--
i0_HQ_sampled12fd9_c39166_f5p0_480	--	--	--	--	--	--	--	--	--	--	--	--	--	--	--	--	--	--	--	--	--
i0_HQ_sampled12fd9_c391865_f2p0_480	--	--	--	--	--	--	--	--	--	--	--	--	--	--	--	--	--	--	--	--	--
i0_HQ_sampled12fd9_c392554_f2p0_487	--	--	--	--	--	--	--	--	--	--	--	--	--	--	--	--	--	--	--	--	--
i0_HQ_sampled12fd9_c39298_f2p0_984	gi|195144378|ref|XP_002013173.1|	GL23535 [Drosophila persimilis]	P49055.1	RecName: Full=Actin, alpha skeletal muscle; AltName: Full=Alpha-actin-1; Flags: Precursor	dpe:Dper_GL23535	K05692	ACTB_G1	actin beta/gamma 1	ko04145|ko04520|ko04670|ko04015|ko04390|ko04611|ko04391|ko04510|ko04745|ko04810|ko04530|ko04919|ko04210|ko04921	Phagosome|Adherens junction|Leukocyte transendothelial migration|Rap1 signaling pathway|Hippo signaling pathway|Platelet activation|Hippo signaling pathway - fly|Focal adhesion|Phototransduction - fly|Regulation of actin cytoskeleton|Tight junction|Thyroid hormone signaling pathway|Apoptosis|Oxytocin signaling pathway	KOG0676	Actin and related proteins	[Z]	CELLULAR PROCESSES AND SIGNALING	Cytoskeleton	Z	COG5277	Actin-related protein	--	--	--
i0_HQ_sampled12fd9_c39318_f2p0_360	--	--	--	--	--	--	--	--	--	--	--	--	--	--	--	--	--	--	--	--	--
i0_HQ_sampled12fd9_c395_f35p0_909	--	--	--	--	--	--	--	--	--	--	--	--	--	--	--	--	--	--	--	--	--
i0_HQ_sampled12fd9_c396085_f4p0_374	--	--	--	--	--	--	--	--	--	--	--	--	--	--	--	--	--	--	--	--	--
i0_HQ_sampled12fd9_c39628_f3p0_587	--	--	--	--	--	--	--	--	--	--	--	--	--	--	--	--	--	--	--	--	--
i0_HQ_sampled12fd9_c397585_f5p0_910	gi|283854609|gb|ADB44900.1|	DEAD(Asp-Glu-Ala-Asp) box polypeptide 5 [Macrobrachium nipponense]	P17844.1	RecName: Full=Probable ATP-dependent RNA helicase DDX5; AltName: Full=DEAD box protein 5; AltName: Full=RNA helicase p68	tca:661233	K13178	DDX17	ATP-dependent RNA helicase DDX17	--	--	KOG0331	ATP-dependent RNA helicase	[A]	INFORMATION STORAGE AND PROCESSING	RNA processing and modification	L	COG0513	purine NTP-dependent helicase activity	Molecular Function: nucleic acid binding (GO:0003676);|Molecular Function: helicase activity (GO:0004386);|Molecular Function: ATP binding (GO:0005524);	--	--
i0_HQ_sampled12fd9_c39812_f3p0_406	--	--	--	--	--	--	--	--	--	--	--	--	--	--	--	--	--	--	--	--	--
i0_HQ_sampled12fd9_c398296_f2p0_526	gi|512911411|ref|XP_004927405.1|	PREDICTED: cytochrome c oxidase subunit 6B1 isoform X2 [Bombyx mori]	O94581.2	RecName: Full=Cytochrome c oxidase subunit 6B; AltName: Full=Cytochrome c oxidase polypeptide VIb	sko:102805462	K02267	COX6B	cytochrome c oxidase subunit 6b	ko00190|ko04260	Oxidative phosphorylation|Cardiac muscle contraction	--	--	--	--	--	O	ENOG41121WM	cytochrome C oxidase	--	--	--
i0_HQ_sampled12fd9_c4001_f2p2_552	--	--	--	--	--	--	--	--	--	--	--	--	--	--	--	--	--	--	--	--	--
i0_HQ_sampled12fd9_c400329_f2p0_365	--	--	--	--	--	--	--	--	--	--	--	--	--	--	--	--	--	--	--	--	--
i0_HQ_sampled12fd9_c400432_f3p0_723	--	--	--	--	--	--	--	--	--	--	--	--	--	--	--	--	--	--	--	--	--
i0_HQ_sampled12fd9_c400498_f3p0_924	gi|722490038|ref|YP_009107164.1|	cytochrome c oxidase subunit III (mitochondrion) [Eulimnogammarus vittatus]	B0FWD1.1	RecName: Full=Cytochrome c oxidase subunit 3; AltName: Full=Cytochrome c oxidase polypeptide III	cqu:COX3	K02262	COX3	cytochrome c oxidase subunit 3	ko00190|ko04260	Oxidative phosphorylation|Cardiac muscle contraction	--	--	--	--	--	C	COG1845	Cytochrome C Oxidase, Subunit III	Molecular Function: cytochrome-c oxidase activity (GO:0004129);|Cellular Component: mitochondrion (GO:0005739);|Cellular Component: integral component of membrane (GO:0016021);|Biological Process: aerobic electron transport chain (GO:0019646);|Biological Process: hydrogen ion transmembrane transport (GO:1902600);	--	--
i0_HQ_sampled12fd9_c401098_f2p0_543	--	--	--	--	--	--	--	--	--	--	--	--	--	--	--	--	--	--	--	--	--
i0_HQ_sampled12fd9_c4021_f3p0_954	--	--	--	--	--	--	--	--	--	--	--	--	--	--	--	--	--	--	--	--	--
i0_HQ_sampled12fd9_c402212_f5p0_597	--	--	--	--	--	--	--	--	--	--	--	--	--	--	--	--	--	--	--	--	--
i0_HQ_sampled12fd9_c402516_f2p0_249	gi|675865082|ref|XP_009018101.1|	hypothetical protein HELRODRAFT_157041 [Helobdella robusta]	Q94300.1	RecName: Full=60S ribosomal protein L11-1	hro:HELRODRAFT_157041	K02868	RP-L11e, RPL11	large subunit ribosomal protein L11e	ko03010	Ribosome	KOG0397	60S ribosomal protein L11	[J]	INFORMATION STORAGE AND PROCESSING	Translation, ribosomal structure and biogenesis	J	COG0094	This is 1 of the proteins that binds and probably mediates the attachment of the 5S RNA into the large ribosomal subunit, where it forms part of the central protuberance. In the 70S ribosome it contacts protein S13 of the 30S subunit (bridge B1b), connecting the 2 subunits	Molecular Function: structural constituent of ribosome (GO:0003735);|Cellular Component: ribosome (GO:0005840);|Biological Process: translation (GO:0006412);	--	--
i0_HQ_sampled12fd9_c40270_f2p0_396	--	--	--	--	--	--	--	--	--	--	--	--	--	--	--	--	--	--	--	--	--
i0_HQ_sampled12fd9_c403075_f5p0_808	--	--	--	--	--	--	--	--	--	--	--	--	--	--	--	--	--	--	--	--	--
i0_HQ_sampled12fd9_c40360_f2p0_524	gi|326496204|dbj|BAJ94564.1|	predicted protein [Hordeum vulgare subsp. vulgare]	Q9GRJ3.1	RecName: Full=40S ribosomal protein S23	hro:HELRODRAFT_192684	K02973	RP-S23e, RPS23	small subunit ribosomal protein S23e	ko03010	Ribosome	--	--	--	--	--	J	COG0048	Interacts with and stabilizes bases of the 16S rRNA that are involved in tRNA selection in the A site and with the mRNA backbone. Located at the interface of the 30S and 50S subunits, it traverses the body of the 30S subunit contacting proteins on the other side and probably holding the rRNA structure together. The combined cluster of proteins S8, S12 and S17 appears to hold together the shoulder…	Molecular Function: structural constituent of ribosome (GO:0003735);|Biological Process: translation (GO:0006412);|Cellular Component: small ribosomal subunit (GO:0015935);	--	--
i0_HQ_sampled12fd9_c4040_f3p0_679	--	--	--	--	--	--	--	--	--	--	--	--	--	--	--	--	--	--	--	--	--
i0_HQ_sampled12fd9_c40477_f2p0_319	--	--	--	--	--	--	--	--	--	--	--	--	--	--	--	--	--	--	--	--	--
i0_HQ_sampled12fd9_c407269_f5p0_833	gi|731188617|ref|YP_009111311.1|	polyprotein [Dinocampus coccinellae paralysis virus]	P13025.1	RecName: Full=RNA1 polyprotein; AltName: Full=P1; Contains: RecName: Full=P1A protein; Short=1A; AltName: Full=Protease cofactor; Contains: RecName: Full=Putative ATP-dependent helicase; AltName: Full=1B; AltName: Full=Membrane-binding protein; AltName: Full=NTP-binding protein; Short=NTB; Contains: RecName: Full=Viral genome-linked protein; AltName: Full=1C-VPg; Contains: RecName: Full=Picornain…	--	--	--	--	--	--	--	--	--	--	--	--	--	--	Molecular Function: hydrolase activity (GO:0016787);	--	--
i0_HQ_sampled12fd9_c40896_f2p0_647	--	--	--	--	--	--	--	--	--	--	--	--	--	--	--	--	--	--	--	--	--
i0_HQ_sampled12fd9_c409022_f3p0_386	--	--	--	--	--	--	--	--	--	--	--	--	--	--	--	--	--	--	--	--	--
i0_HQ_sampled12fd9_c409103_f3p0_544	--	--	--	--	--	--	--	--	--	--	--	--	--	--	--	--	--	--	--	--	--
i0_HQ_sampled12fd9_c410112_f2p0_279	--	--	--	--	--	--	--	--	--	--	--	--	--	--	--	--	--	--	--	--	--
i0_HQ_sampled12fd9_c41057_f4p0_547	gi|936583106|ref|XP_014205605.1|	PREDICTED: chromatin accessibility complex protein 1-like [Copidosoma floridanum]	Q9NRG0.1	RecName: Full=Chromatin accessibility complex protein 1; Short=CHRAC-1; AltName: Full=Chromatin accessibility complex 15 kDa protein; Short=CHRAC-15; Short=HuCHRAC15; AltName: Full=DNA polymerase epsilon subunit p15	nvi:100118128	K11656	CHRAC1, CHRAC15	chromatin accessibility complex protein 1	--	--	--	--	--	--	--	K	COG5208	Nuclear transcription factor Y	--	--	--
i0_HQ_sampled12fd9_c4110_f2p0_899	--	--	--	--	--	--	--	--	--	--	--	--	--	--	--	--	--	--	--	--	--
i0_HQ_sampled12fd9_c41149_f2p0_458	--	--	--	--	--	--	--	--	--	--	--	--	--	--	--	--	--	--	--	PF01391.17	Collagen triple helix repeat (20 copies)
i0_HQ_sampled12fd9_c411714_f3p0_630	gi|942387811|gb|JAN75835.1|	Tubulin alpha-1 chain [Daphnia magna]	P41351.1	RecName: Full=Tubulin alpha chain; AltName: Full=Alpha-tubulin; Contains: RecName: Full=Detyrosinated tubulin alpha chain	tet:TTHERM_00558620	K07374	TUBA	tubulin alpha	ko04540|ko04210|ko04145	Gap junction|Apoptosis|Phagosome	--	--	--	--	--	Z	COG5023	protein polymerization	Molecular Function: GTPase activity (GO:0003924);|Molecular Function: structural constituent of cytoskeleton (GO:0005200);|Molecular Function: GTP binding (GO:0005525);|Cellular Component: cytoplasm (GO:0005737);|Cellular Component: microtubule (GO:0005874);|Biological Process: microtubule-based process (GO:0007017);	--	--
i0_HQ_sampled12fd9_c411769_f3p0_493	gi|342326258|gb|AEL23044.1|	signal sequence receptor beta-like protein, partial [Cherax quadricarinatus]	Q5E9E4.1	RecName: Full=Translocon-associated protein subunit beta; Short=TRAP-beta; AltName: Full=Signal sequence receptor subunit beta; Short=SSR-beta; Flags: Precursor	isc:IscW_ISCW012704	K13250	SSR2	translocon-associated protein subunit beta	ko04141	Protein processing in endoplasmic reticulum	--	--	--	--	--	U	ENOG4111KGI	signal sequence receptor, beta (translocon-associated protein beta)	Cellular Component: endoplasmic reticulum (GO:0005783);|Cellular Component: integral component of membrane (GO:0016021);	--	--
i0_HQ_sampled12fd9_c4118_f3p0_788	--	--	--	--	--	--	--	--	--	--	--	--	--	--	--	--	--	--	--	--	--
i0_HQ_sampled12fd9_c411_f19p0_579	gi|985413921|ref|XP_015372426.1|	PREDICTED: cuticle protein 19.8-like [Diuraphis noxia]	--	--	--	--	--	--	--	--	--	--	--	--	--	S	ENOG41125JG	structural constituent of chitin-based cuticle	--	--	--
i0_HQ_sampled12fd9_c412089_f2p0_257	--	--	--	--	--	--	--	--	--	--	--	--	--	--	--	--	--	--	--	--	--
i0_HQ_sampled12fd9_c412144_f2p0_713	--	--	--	--	--	--	--	--	--	--	--	--	--	--	--	--	--	--	--	--	--
i0_HQ_sampled12fd9_c413120_f2p0_249	--	--	--	--	--	--	--	--	--	--	--	--	--	--	--	--	--	--	--	--	--
i0_HQ_sampled12fd9_c41354_f2p0_559	--	--	--	--	--	--	--	--	--	--	--	--	--	--	--	--	--	--	--	--	--
i0_HQ_sampled12fd9_c41385_f2p0_289	--	--	--	--	--	--	--	--	--	--	--	--	--	--	--	--	--	--	--	--	--
i0_HQ_sampled12fd9_c415119_f2p0_236	--	--	--	--	--	--	--	--	--	--	--	--	--	--	--	--	--	--	--	--	--
i0_HQ_sampled12fd9_c415169_f2p0_393	--	--	--	--	--	--	--	--	--	--	--	--	--	--	--	--	--	--	--	--	--
i0_HQ_sampled12fd9_c415900_f2p0_819	--	--	--	--	--	--	--	--	--	--	--	--	--	--	--	--	--	--	--	--	--
i0_HQ_sampled12fd9_c416122_f2p0_799	gi|111572543|gb|ABH10628.1|	laminin receptor [Litopenaeus vannamei]	Q0PXX8.1	RecName: Full=40S ribosomal protein SA	hro:HELRODRAFT_185784	K02998	RP-SAe, RPSA	small subunit ribosomal protein SAe	ko03010	Ribosome	KOG0830	40S ribosomal protein SA (P40)/Laminin receptor 1	[J]	INFORMATION STORAGE AND PROCESSING	Translation, ribosomal structure and biogenesis	J	COG0052	30S ribosomal protein S2	Biological Process: ribosomal small subunit assembly (GO:0000028);|Molecular Function: structural constituent of ribosome (GO:0003735);|Biological Process: translation (GO:0006412);|Cellular Component: cytosolic small ribosomal subunit (GO:0022627);	--	--
i0_HQ_sampled12fd9_c418283_f2p0_283	--	--	--	--	--	--	--	--	--	--	--	--	--	--	--	--	--	--	--	--	--
i0_HQ_sampled12fd9_c418284_f3p0_491	--	--	--	--	--	--	--	--	--	--	--	--	--	--	--	--	--	--	--	--	--
i0_HQ_sampled12fd9_c418298_f3p0_491	--	--	--	--	--	--	--	--	--	--	--	--	--	--	--	--	--	--	--	--	--
i0_HQ_sampled12fd9_c418400_f2p0_389	--	--	--	--	--	--	--	--	--	--	--	--	--	--	--	--	--	--	--	--	--
i0_HQ_sampled12fd9_c4184_f5p12_740	--	--	--	--	--	--	--	--	--	--	--	--	--	--	--	--	--	--	--	--	--
i0_HQ_sampled12fd9_c42118_f6p0_543	gi|321477047|gb|EFX88006.1|	hypothetical protein DAPPUDRAFT_311515 [Daphnia pulex]	Q9V7U0.1	RecName: Full=Pro-resilin; Flags: Precursor	--	--	--	--	--	--	--	--	--	--	--	--	--	--	--	--	--
i0_HQ_sampled12fd9_c421_f27p1_609	--	--	--	--	--	--	--	--	--	--	--	--	--	--	--	--	--	--	--	--	--
[truncated: 6,879 more rows]
